# Supplementary material for: Performance of bias-correction schemes for CMORPH rainfall estimates in the Zambezi River basin
Source: Copernicus journal article supplement (doi:10.5194/hess-23-2915-2019), 2019-07-12
Supplement: Supplementary file 1 [file hess-23-2915-2019-supplement.zip]

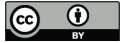

## *Supplement of*

# **Performance of bias-correction schemes for CMORPH rainfall estimates in the Zambezi River basin**

**Webster Gumindoga et al.**

*Correspondence to:* Webster Gumindoga ([w.gumindoga@utwente.nl](mailto:w.gumindoga@utwente.nl))

- [hess-23-2915-2019-supplement-title-page.pdf](#)
- Data
  - Bias (%)\_1998-2013.tif
  - Bias (%)\_1998-2013.tif.aux.xml
  - CMORPH\_daily rainfall for zambezi stations\_1998\_2013.xls
  - Mean Annual Rainfall\_CMORPH\_1998-2013.tif
  - Mean Annual Rainfall\_CMORPH\_1998-2013.tif.aux.xml
  - Mean Annual Rainfall\_Gauge\_1998-2013.tif
  - Mean Annual Rainfall\_Gauge\_1998-2013.tif.aux.xml
  - Mean Daily Rainfall\_CMORPH\_1998-2013.tif
  - Mean Daily Rainfall\_CMORPH\_1998-2013.tif.aux.xml
  - Mean Daily Rainfall\_Gauge\_1998-2013.tif
  - Mean Daily Rainfall\_Gauge\_1998-2013.tif.aux.xml
  - Metadata File\_HESS-2017-385.docx
  - Zambezi\_60 stations locations.dbf
  - Zambezi\_60 stations locations.prj
  - Zambezi\_60 stations locations.qpj
  - Zambezi\_60 stations locations.shp
  - Zambezi\_60 stations locations.shx

The copyright of individual parts of the supplement might differ from the CC BY 4.0 License.
