# Supplementary material for: Performance of bias-correction schemes for CMORPH rainfall estimates in the Zambezi River basin
Source: Copernicus journal article supplement (doi:10.5194/hess-23-2915-2019), 2019-07-12
Supplement: Supplementary file 1 [file Metadata File_HESS-2017-385.docx]

**Supplementary data**

*Supplementary data consists of shapefiles of the Zambezi study area boundary, sub-basin boundaries, location of the 60 raingauges and lakes (Figure 1). Additional material provided is the raster files of uncorrected CMORPH bias (%) making up Figure 2. Raster files of daily and yearly uncorrected CMORPH and gauge rainfall from 1998-2013 are also provided. Table shows necessary information such as units, temporal and spatial extent of data.*

*Meta data*

| Data | Format | Temporal extent | Spatial extent | Units | Coordinate System |
| --- | --- | --- | --- | --- | --- |
| Subbasins | Shapefile |  | Zambezi basin |  | WGS 1984 |
| Lakes | Shapefile |  | Zambezi basin |  | WGS 1984 |
| Raingauge | Shapefile |  | 60 stations in Zambezi basin |  | WGS 1984 |
| Bias (%) | Raster (tiff) | 1998-2013 | Zambezi basin | % | WGS 1984 |
| Mean Annual Precipitation (Gauge and Uncorrected Rainfall) | Raster  (tiff) | Annual from 1998-2013 | Zambezi basin | mm yr-1 | WGS 1984 |
| Mean Daily Precipitation (Gauge and Uncorrected Rainfall) | Raster  (tiff) | Daily from 1998-2013 | Zambezi basin | mm d-1 | WGS 1984 |
