# Supplementary material for: Performance of bias-correction schemes for CMORPH rainfall estimates in the Zambezi River basin
Source: Copernicus journal article supplement (doi:10.5194/hess-23-2915-2019), 2019-07-12
Supplement: Supplementary file 2 [file hess-23-2915-2019-supplement.zip]

Archive with 19 entries (18 files):
- hess-23-2915-2019-supplement-title-page.pdf
- Data/
- Data/Zambezi_60 stations locations.shx
- Data/Zambezi_60 stations locations.prj
- Data/Zambezi_60 stations locations.qpj
- Data/Zambezi_60 stations locations.dbf
- Data/Bias (%)_1998-2013.tif.aux.xml
- Data/Mean Annual Rainfall_CMORPH_1998-2013.tif
- Data/Mean Daily Rainfall_Gauge_1998-2013.tif
- Data/Mean Annual Rainfall_Gauge_1998-2013.tif
- Data/Zambezi_60 stations locations.shp
- Data/Mean Daily Rainfall_CMORPH_1998-2013.tif.aux.xml
- Data/Mean Annual Rainfall_Gauge_1998-2013.tif.aux.xml
- Data/CMORPH_daily rainfall for zambezi stations_1998_2013.xls
- Data/Metadata File_HESS-2017-385.docx
- Data/Bias (%)_1998-2013.tif
- Data/Mean Annual Rainfall_CMORPH_1998-2013.tif.aux.xml
- Data/Mean Daily Rainfall_Gauge_1998-2013.tif.aux.xml
- Data/Mean Daily Rainfall_CMORPH_1998-2013.tif
