# Supplementary material for: Performance of bias-correction schemes for CMORPH rainfall estimates in the Zambezi River basin
Source: Copernicus journal article supplement (doi:10.5194/hess-23-2915-2019), 2019-07-12
Supplement: Supplementary file 2 [file hess-23-2915-2019-supplement.zip › Data/Bias (%)_1998-2013.tif.aux.xml]

<PAMDataset>
  <PAMRasterBand band="1">
    <Metadata>
      <MDI key="STATISTICS_MAXIMUM">45.103294372559</MDI>
      <MDI key="STATISTICS_MEAN">-3.4620219441685</MDI>
      <MDI key="STATISTICS_MINIMUM">-62.86060333252</MDI>
      <MDI key="STATISTICS_STDDEV">5.5931971299338</MDI>
    </Metadata>
  </PAMRasterBand>
</PAMDataset>
