# Supplementary material for: Performance of bias-correction schemes for CMORPH rainfall estimates in the Zambezi River basin
Source: Copernicus journal article supplement (doi:10.5194/hess-23-2915-2019), 2019-07-12
Supplement: Supplementary file 2 [file hess-23-2915-2019-supplement.zip › Data/CMORPH_daily rainfall for zambezi stations_1998_2013.xls]

## Sheet: CMORPH_54 stations
Station	Mushumbi	Rukomechi	Muzarabani	Zumbo	Caia	Marromeu	Tembue	Chingodzi	Morrumbala	Mutarara	Balaka	Chikwawa	Chileka	Chingale	Makhanga	Mwanza	Nchalo	Neno	Nsanje	Ngabu	Mimosa	Thyolo	Bvumbwe	Chichiri	Chileka	Makoka	Mangochi	Monkey	Dedza	Chitedze	KIA	Salima	Nkhota	Kasungu	Mzimba	Nkhata	Mzuzu	Bolero	Karonga	Chitipa	Tembwe	MAVINGA	CAZOMBO	LUENA_(LUSO)	PANDAMATENGA	KASANE	MAKANGA	NGABU	THYOLO
X	30.5579	29.38	31.0076	30.45	35.3833	36.95	32.8333	34.6333	35.5833	33	34.97	34.7833	34.9667	35.25	35.15	34.5167	34.9333	34.65	35.2667	34.95	35.62	35.13	35.07	35.05	34.97	35.18	35.25	34.92	34.25	33.63	33.78	34.58	34.28	33.47	33.6	34.3	34.02	33.78	33.95	33.27	33.07	20.35	22.9	19.917	25.633	25.15	35.15	34.95	35.217
Y	-16.1531	-16.1317	-16.3887	-15.6167	-17.8167	-18.2833	-14.9	-16	-17.35	-17.3833	-14.98	-16.0333	-15.6667	-15.3667	-16.5167	-15.6167	-16.2333	-15.4	-16.95	-16.5	-16.07	-16.13	-15.92	-15.78	-15.67	-15.53	-14.47	-14.08	-14.32	-13.97	-13.78	-13.75	-12.92	-13.02	-11.9	-11.6	-11.43	-11.02	-9.88	-9.7	-13.92	-15.833	-11.867	-11.783	-18.533	-17.817	-16.517	-16.5	-16.149
1998-01-01	2.5	25.4	8	18.9	11.9	0	7.9	0.6	16.6	2.3	0.1	0.8	0.5	0.3	0.2	0.7	0.8	1	1.6	0.1	0.3	0.1	0	0	0.5	0.2	0	0	0.1	1.6	1.6	0	0.5	3.1	1	0	0	0.4	0.8	0.4	2.3	45.6	10.7	3.6	34.7	86	0.2	0.1	0.1
1998-01-02	15.6	3.6	23.5	13.3	13.1	1.6	0.9	3	34	11.4	0	5.7	0.5	0	7.1	0	5.7	0	12.8	4	5.9	7.1	3.4	3.4	0.5	1	0.3	0	0	0.3	1.4	0.3	5.7	8.3	0.8	1.1	0.5	0.9	1.4	0.8	2.4	0.9	1.3	1	2.7	0	7.1	4	7.1
1998-01-03	0.2	0.7	0.7	1.1	3.2	4.2	2.1	2.5	7.6	9	8.1	2.7	19.1	17.3	5.1	11.1	2.7	15.3	2	3.5	16	6.5	7	7	19.1	16.2	0.4	0.4	0.3	1	0.6	1.3	15	5.1	0.2	1	0.2	0.1	0.8	1.2	2.7	21.4	3.2	2.6	15.3	3.1	5.1	3.5	6.5
1998-01-04	2.9	1.5	4.1	0.9	1	24.4	0.9	4.9	11.8	0.8	1.5	4.9	1.8	1.6	13.9	1.3	4.9	1.3	11.5	6.2	11.9	5.6	3.3	3.3	1.8	2.5	8	0.7	1.2	1.1	1.3	1.1	3.5	0.4	4.5	3.2	2	1.1	0.1	1.6	3.7	11.2	0.3	0.1	6.5	15.5	13.9	6.2	5.6
1998-01-05	0.1	3.5	0.1	0.6	2.5	0.6	14.5	0	1.4	0.9	2.6	0.2	0.3	0.4	0	0	0.2	0	1.5	0	3.3	0.4	6.7	6.7	0.3	2.5	5.8	2.1	3.2	1.4	1.2	0.2	0	0.5	0.9	0.9	1.5	1.7	1.5	3.2	1.7	12.4	0	0	0.6	3.7	0	0	0.4
1998-01-06	1.8	1.9	0.6	0.5	0	0.1	1.4	0	0	0.3	0	0	0	13.6	13.2	0	0	0	0.2	0	27.5	2.2	1.6	1.6	0	1.1	0.2	0	0	0.1	0	0.4	0.8	0.3	1.9	0	1.1	2.1	0.5	1.3	6.2	34.2	2.6	2.8	35.4	24.1	13.2	0	2.2
1998-01-07	0	15.4	0	0	37.4	2.8	4.9	9.7	5.4	1	1.5	5	3.2	1.6	0.2	5	5	3.5	0.9	5.4	0.1	0.9	1.8	1.8	3.2	1.5	1.9	12.2	6.8	5.7	1.6	2.9	0.1	3	0.1	0.2	0.6	2	0.7	0.1	6.4	1.5	1.9	0.1	0.1	0	0.2	5.4	0.9
1998-01-08	0	17	0	0	48.1	2.1	31.6	6.1	9.5	44.5	6.9	18.1	11.3	11.8	47.8	4.1	18.1	3.2	42.8	24.1	6.8	27.1	21.9	21.9	11.3	16.6	17.7	5.3	18.5	29.8	27.9	4	4.5	5.2	2	1.2	2	3.3	0	0.3	18.7	0	6.7	2.8	10	10.9	47.8	24.1	27.1
1998-01-09	5.9	7.3	3.5	10.8	6.3	6.7	19.1	2.7	3.3	4.3	0.2	2	1	3.3	8.8	0.5	2	0.3	2.8	4.1	0.5	16.4	11.9	11.9	1	5	0.1	0	0.3	0	0	0.1	2.2	0	0.5	0.3	0.4	0.2	5.8	1.2	1	0	27.7	3.6	6.5	1.8	8.8	4.1	16.4
1998-01-10	9.6	20.3	0.3	20	1.5	7.1	14.9	1	0	30.2	7.6	2.4	1.6	1.8	1.1	2.7	2.4	3.8	2	1.8	0.9	3.8	2.8	2.8	1.6	3.1	6.6	5.5	3	2.6	10.8	1.1	2.4	3.7	1.2	3.7	0.9	0.3	0.8	0.9	4.4	0	1.4	0	0	0	1.1	1.8	3.8
1998-01-11	9.6	4.7	15.6	2.8	17	5.2	4.6	7.4	4.2	15.9	17.8	3.7	1.7	1.9	4	5	3.7	7.1	3.3	4.4	3.1	2.1	1.7	1.7	1.7	0.6	15.4	7.2	7.8	6	4.9	5.6	4.1	0.7	11.4	7.7	9.5	3	3.1	3.1	5.4	0	0	5.3	0.6	0	4	4.4	2.1
1998-01-12	1.7	1	3.3	0.1	13.9	10.2	0.2	2	7	11.2	4.4	2	0.7	6.2	18.2	0.4	2	1.5	11.2	20.7	3.1	2.3	0.2	0.2	0.7	1.5	8.2	2.6	0.9	3.2	3.4	1.7	1.1	0.9	4	4.8	3	1.5	11.2	1.3	1.7	1	8.5	0	0.4	2	18.2	20.7	2.3
1998-01-13	0	0	0.2	0	0.2	0.9	0.4	0.9	0.1	0	0.1	0.6	0.2	0	1.6	0.6	0.6	0.1	2.4	1.1	1.1	1.6	1.3	1.3	0.2	0.3	7.2	14.5	2.1	7.3	3.6	12.8	32.9	2.7	2.4	17.7	7.5	1.4	12.6	1.6	1.2	0.1	2.2	3.8	0.1	0.8	1.6	1.1	1.6
1998-01-14	0.9	0.1	1.8	0.1	2.9	0.4	1.8	2.2	2.8	1.6	4.3	3.2	0.8	2.1	1.6	1.3	3.2	0.3	1.8	1.2	1.4	2.6	0.9	0.9	0.8	0.7	7.1	4.6	6.2	6.6	4	3.8	7.8	2.5	10.1	8	5.4	2	0.8	7.2	16.4	0.7	0.6	0.9	0	0	1.6	1.2	2.6
1998-01-15	5.4	2.4	2.8	0.8	0.2	0.5	0.9	2.2	0.6	1.7	7.5	1.3	3.7	2.1	0.7	6.3	1.3	10	1.1	0.6	1	1.3	2.5	2.5	3.7	2.2	2.3	4.2	9.2	4.9	6.6	4.5	7.7	7.9	4.5	1.5	1.5	2	1.3	0.3	13.9	2	0.4	0	1.8	0.3	0.7	0.6	1.3
1998-01-16	0.4	0.3	0.3	2.9	0.7	0.5	0	0.1	0	0.6	0.1	0	0.1	0.1	0	0.2	0	0.3	0.1	0	0.2	0	0	0	0.1	0.1	4	4.1	0.7	0.3	2.1	3.2	2.4	3.8	1.2	3.5	3.9	0.9	0.9	3.5	3.2	2.5	0.5	0.1	0	0.2	0	0	0
1998-01-17	0.2	0	0.4	0.1	9.4	15.4	2.1	1.3	8.9	1	0.1	1.1	0.5	0.3	4.5	0.4	1.1	0.1	7.5	4.4	2.2	1.2	0.8	0.8	0.5	0.6	0.3	0.3	0	5.2	3.9	1.4	4.2	3.5	1.9	3.2	2.6	1	2	2.1	6.4	0.2	1.6	0.3	0.3	1.2	4.5	4.4	1.2
1998-01-18	13.9	0.4	41.9	0.1	36.2	13.2	0	10.1	36.7	4.8	5.8	10.1	13.8	7.4	9.8	11	10.1	14.8	19.6	6.3	16.4	12.4	14.9	14.9	13.8	10.5	0.1	0.7	1.6	1.6	0.9	0.9	0.1	26.9	0	0.3	0.3	0.1	0	0	1.8	0.1	7	0.6	0.1	0	9.8	6.3	12.4
1998-01-19	4.3	0.9	2.2	0.1	16.5	38.1	0	1.6	22.3	29	0.1	2.5	0.6	0.1	13.8	1.1	2.5	0.4	18.6	3.8	3.6	2	0.4	0.4	0.6	0.5	0.5	0.3	2.1	5.9	1.5	0.3	16.8	3.2	3.5	2.7	3.2	2.3	0.1	0	4.1	8.1	8	0.9	0.1	0	13.8	3.8	2
1998-01-20	4.7	0.1	3.3	0	23.5	35.1	6.4	42.7	46	12.3	1.8	41.5	19.4	4.3	26.5	13.2	41.5	11.3	40.5	71.2	23.4	15.1	12.1	12.1	19.4	5.4	1.7	0	10.5	3.1	9.8	0	0.1	1.6	0.8	2.5	1.3	4.5	0.4	0.1	13.9	0.3	7.2	3.3	13.4	13.3	26.5	71.2	15.1
1998-01-21	1.2	3.6	0	1.5	18.7	85.5	4.1	1.3	51	1.4	0	3.8	0	2	10.2	0	3.8	0	28	3.5	7.6	13.8	5.9	5.9	0	0.2	1.1	2.8	7.1	1.4	0.8	1.8	3.7	9.7	1.2	4.9	2.3	3.1	1.4	1	4.6	5.5	0	21.9	4.6	22.5	10.2	3.5	13.8
1998-01-22	7.9	2.7	9	3.1	0.5	0.7	14.3	0.9	1.4	10.6	0.8	0.4	0	1.4	0.9	0.8	0.4	0.1	1.8	0.2	1.2	0.3	0	0	0	0	35.4	1.5	4.3	5.2	8.9	0	0.5	14.5	1.4	0.1	0	0.7	0.2	0.9	0.5	18.4	3.1	1.1	2.8	0.7	0.9	0.2	0.3
1998-01-23	1.7	0.4	2.8	1.8	0	0	3.2	0.4	1.5	0.1	14.8	1.5	3.6	16.1	1.9	4.4	1.5	22.5	0.7	0.5	51.5	6.1	14.6	14.6	3.6	8.9	16	13.6	2.6	5.2	1.4	3.1	1.5	2.8	0.1	6	1.2	0	0	0	3.4	8.1	1.3	1.5	0	0.1	1.9	0.5	6.1
1998-01-24	29.4	1.5	3.7	6.4	4.1	3.8	0.8	0.2	0	0	1.7	0.3	0.5	4.4	0	0.4	0.3	2.9	0	0	4.9	0.4	2.5	2.5	0.5	2.4	26.3	7.7	0.5	0.6	0.2	6.4	20.4	0.9	0	5.4	0	0	0.3	1.7	3.7	0	0.5	0.4	0.1	3.7	0	0	0.4
1998-01-25	13.8	15.2	6.1	10.4	12.4	26.2	19.7	4.2	7.1	2.9	9.3	7.3	4	9.7	2.5	7.4	7.3	12.1	4.8	4	20.1	9.9	7.4	7.4	4	5	5.6	18	36.2	6.3	15.3	17.9	12.3	2.3	0.4	8.1	5.7	3.1	0.1	0	2	0.7	0.8	6.2	3.6	6.6	2.5	4	9.9
1998-01-26	5.6	1	2.1	2.8	4.6	24.8	2.3	1.2	0.3	19.7	7.3	2.4	0	0.9	1.6	0	2.4	0	0.4	3.2	0	1.3	0	0	0	0	4	4.3	29.3	0.8	2.2	1.8	3.7	0.4	2.6	10.3	10.2	3.9	0	0.3	0.6	0.2	1.5	1.5	2.5	0.3	1.6	3.2	1.3
1998-01-27	8.3	20.7	10.1	33.5	9.7	17.1	35.4	7.6	14.3	10	1.4	4.2	6.2	2.5	7.1	4.7	4.2	4.6	6.1	5.5	0.6	0.6	4	4	6.2	3.6	0.6	0.3	1.8	1.2	2.2	0.3	0.6	0.3	0.7	0.5	1	0	0	0	0.2	2.3	0.7	1.2	2.2	3.6	7.1	5.5	0.6
1998-01-28	14.4	12.1	2.4	14.5	6.9	0.5	8.2	5.2	8.9	19.8	7.9	3.2	0.2	0.6	1	1.4	3.2	2.1	4.4	1.4	0.6	3.2	2.8	2.8	0.2	0.7	6	3.8	5.2	2.9	1.7	2.1	0.5	0.5	0.3	0.4	1.3	0.5	0.1	5.1	6.7	3.6	0.6	1.5	4.5	5.3	1	1.4	3.2
1998-01-29	8.4	6.8	12	3.9	3.2	0.2	3.8	2.2	3.5	2	5.7	0.7	3.3	6.8	3.1	5.5	0.7	7.1	6.6	4.7	2.1	0.6	1.4	1.4	3.3	3.4	0.2	0.1	2	2.4	2.4	0.1	2.3	1.1	2.6	1.9	1.6	0.5	37.1	10.5	1.5	18.4	1.1	1.3	11.2	8	3.1	4.7	0.6
1998-01-30	8	35.2	0	63.5	0	0.4	1.9	2.8	8.8	0	1.5	3.6	0.4	0.4	20.5	2.4	3.6	2.3	58	6	7.4	4.2	3.9	3.9	0.4	1.3	1.8	0	2.2	19.7	10.3	0.9	1.2	6.8	1.9	2.4	4.3	5.9	16.1	16.2	20.4	21	0.4	3.3	1.1	0.1	20.5	6	4.2
1998-01-31	0.1	6.2	0.2	0	7.3	0.5	0	4.7	9.1	1.5	1.2	3.7	4.1	5.3	10.8	1.6	3.7	1.8	12.1	13	8.3	2.3	4.5	4.5	4.1	6	1.4	0.6	2.3	0.8	0.7	0.5	0.6	0.1	2.7	4.4	3.8	2	11.2	5.8	0.8	6.3	0.8	0.3	0	0	10.8	13	2.3
1998-02-01	1.6	1.6	1	2.7	11.2	1.7	2.5	0.1	10.6	1.3	1.3	0.2	0.4	0.4	1.6	0.3	0.2	0.2	4.4	3.4	0.4	0.2	0	0	0.4	0.5	0.4	0.5	0.3	0.5	0.1	0.4	6.8	0.1	0.1	0.1	0	0	0.3	0	1.1	0.1	1.4	3.6	0	0	1.6	3.4	0.2
1998-02-02	4.1	1.1	14.2	2.6	17.3	26.3	15.6	7.6	13.2	3.1	3.1	6.9	10.2	4.6	7.2	10.3	6.9	7.3	6	6.6	6.7	4.4	11.8	11.8	10.2	10.3	8.7	6.5	6.2	2	3.3	2.9	0.2	0.1	0	0	0	0	0	0	0.2	0	0.4	4.8	0	0	7.2	6.6	4.4
1998-02-03	0.1	0.1	1.8	0	0.2	6.7	7.5	3.9	0	1	7	6.7	4.5	2.8	2.4	4.2	6.7	4.2	0.5	2.3	9.3	10.6	10.1	10.1	4.5	4.7	5.3	1.2	2.1	6.5	4.3	2.2	0.1	1	2.8	0.9	0.8	0.7	2.8	2	9.1	0.4	0.4	0.6	0	0.1	2.4	2.3	10.6
1998-02-04	2	0.1	0.6	0	0	0	0	0	0	0	0	0	0.1	0	0	0	0	0	0	0	0.2	0	0	0	0.1	0.1	0.8	0.7	0	0	0	0.1	0.1	0.4	1	1	1	2.3	0.2	0	0	0.1	0.1	1.2	1.1	0.5	0	0	0
1998-02-05	0.2	0.1	0	0	0	0.1	0	0	0	0	0	0	0	0	0	0	0	0	0	0	0	0	0	0	0	0	0.4	0.3	0	0.1	0.1	0.3	0.1	0	0	0.1	0	0	2.1	1.2	0	0	0	0	0.4	0.3	0	0	0
1998-02-06	0	0	0.4	0	0	0	0	0	0	0	0	0	0	0	0	0	0	0	0	0	0.1	0	0	0	0	0	0	0.1	0	0.1	0	0.1	0	0.4	1.5	0.8	1.3	0.4	11	26.7	0	0	0	0	0	0.3	0	0	0
1998-02-07	0	0	0	0	0	0	0	0	0	0	0	0	0	0	0	0	0	0	0	0	0	0	0	0	0	0	0.1	0.1	0	0.1	0	0.2	0	0.1	2.3	2	3.5	1.6	5.3	6	0	0	2	0	0	0	0	0	0
1998-02-08	0	0	0	0	0	0	0.4	0	0	0	0	0	0	0	0	0	0	0	0	0	0	0	0	0	0	0	1.4	0	0.2	6.6	2.7	0.1	0.1	0.3	0	0	0	3.3	0.6	19.8	4.6	0.1	0.7	0.5	0	0	0	0	0
1998-02-09	0	0.8	0.1	0	0	0	0	0	0	0	0	0	0	0	0	0	0	0	0	0	0	0	0	0	0	0	0.1	1.2	0	0.1	0.1	1.5	2.3	3.3	0	3	0.7	0.6	0.3	0	0.1	0	9.7	0.6	0	0	0	0	0
1998-02-10	0	0	0	0	0	0	0	0	0	0	0	0	0	0	0	0	0	0	0	0	0	0	0	0	0	0	0	0	0	0	0	0	0	0	0.1	1	2.1	1.9	5.7	0.3	0.2	0	8.3	3.9	0	0	0	0	0
1998-02-11	0	0	0	0	0	0	0	0.1	0	0	0.1	0.1	0	1.4	0	0.1	0.1	0.1	0	0.1	0.4	0	0.1	0.1	0	0.5	4.5	0.3	0.7	1.9	0.5	0.3	1.6	0.1	3.8	28	25.6	17.3	1.4	4.7	4.6	0	1.5	1.4	0	0	0	0.1	0
1998-02-12
1998-02-13	0	0	0	0	0	0.4	0	0	0	0	0.1	0	0	0	0	0	0	0	0	0	0.2	0	0	0	0	0	0.4	0.7	0	0	0	0.6	0.4	0	1.9	4.5	4.1	5.1	0.9	2.5	0	11.3	0.8	5.3	0	0.1	0	0	0
1998-02-14	0	0	0	0	0	0.7	0	0	0	0	0	0	0	0.2	0	0	0	0	0	0	0	0.1	0.2	0.2	0	0.1	0.2	0.2	0	0	0	0.6	0	0	0	1.9	0.8	1	1.6	3	0	0.6	0.4	0	0	0	0	0	0.1
1998-02-15	0	0	0	0	0	2.4	0	0	0	0	0	0	0	0	0	0	0	0	0	0	0.2	0	0	0	0	0	0	0	0	0	0	0	0	0	0.2	0	0	0	0.1	5	0	1.3	0	41.7	0.5	1.6	0	0	0
1998-02-16	0.3	0	9.3	0	0	0.1	0	0	0	0.7	0	0	0	0	0	0	0	0	0	0	0	0	0	0	0	0	0	0	0.9	5	16.4	1.8	0	0	0.5	0	0	0.1	0.5	3.9	1.6	0.5	0.4	16.9	6.6	1.2	0	0	0
1998-02-17	27.1	7.7	53	6.7	0.1	0.1	0.8	0.1	0.2	42.3	0	0.1	0.3	0	0	0.6	0.1	0.9	0	0	0	0	0	0	0.3	0	0	0	0.4	9.5	1	0.3	0	5.2	1.6	0.8	0.3	10.5	6	4.7	5.4	0.7	1.3	9	0.8	0.3	0	0	0
1998-02-18	18.7	43	10.3	9.4	10.7	0.9	0.2	0.7	3.9	0.3	0.1	3	1.5	0	6.1	1.1	3	0.8	8.4	4.5	0	5.2	3.6	3.6	1.5	2.5	0	0	0.3	0	0	1.2	9.7	0	2.1	24.8	27.2	13.3	0.1	0.6	0.4	0.1	6	2.1	56.1	10	6.1	4.5	5.2
1998-02-19	0.1	1.5	1.2	0.2	0.6	4.4	0	2.5	0.5	0	2.1	3	4.2	0.2	0.9	2.7	3	2.5	0.1	0.4	0.9	3.1	3.9	3.9	4.2	4.3	0.3	0.5	4.5	6.6	4.8	0	15.2	0	2.5	2.8	1.2	4.2	0.4	6.1	4.6	0.1	5.6	3	0.1	0.4	0.9	0.4	3.1
1998-02-20	0	0	0	0	0	39.4	0	0	0	0	0	0	0	0	0	0.1	0	0	0	0	0	0	0	0	0	0	0	0.3	0	14.1	56.4	11.7	53.9	24	18.9	1.5	0.3	0.2	12.1	21.8	0.7	1.1	12.1	18.5	2.3	1.6	0	0	0
1998-02-21	3.2	0	1.5	1.5	0.7	2	0.1	0	10.4	0	0	0.4	0.4	1.3	2.3	0	0.4	0	6.6	0.5	18.7	2.7	2.5	2.5	0.4	0.5	0	3	4.9	2	27.5	6.2	0.8	0.6	0.9	0.7	0.2	0.2	0.4	0.2	0	0.1	4.4	15	1.2	0.3	2.3	0.5	2.7
1998-02-22	15.5	4.9	2.5	30.7	0.5	1.2	0.2	0.4	3.7	0	0.6	1.3	2.3	4.8	6.6	1.4	1.3	1.8	4.2	0.7	7	4.4	3.6	3.6	2.3	3.5	0.4	0	2.2	1.1	2.3	1.3	12.6	7.1	4.1	6.9	5.5	0.1	3	17.9	0	9.8	3	25	3.1	5.4	6.6	0.7	4.4
1998-02-23	0	3.2	4.1	2	0.1	10	0.1	0.1	0.3	0	1.5	0.4	0.9	6.7	0.5	0.3	0.4	0.4	0.1	0.4	1.5	1.6	2	2	0.9	2.7	3.9	0.3	0.3	5.3	3.5	7	4.5	2.5	2	12.8	2.6	0.8	14.3	34.3	2.3	0.3	1.4	2.5	0.5	1.3	0.5	0.4	1.6
1998-02-24	1.1	1.9	3.2	0.5	2.1	6.1	0	0.1	1	1.3	0.3	0.1	0	0.6	0.1	0.1	0.1	0.1	0.2	0.1	5.3	0.2	0.2	0.2	0	0.1	0.9	1.4	0.3	0	6	0	0	2.4	4.6	2.2	2.9	1.8	4.6	7.6	0	5.8	2.9	0.1	0	4.6	0.1	0.1	0.2
1998-02-25	0.1	0.6	7.8	0	8.2	29.4	1.6	3.6	12.4	0	9.7	2.5	9.1	11.5	2.4	2.9	2.5	3.7	5.1	3.7	11.5	5.9	7.2	7.2	9.1	6.1	10.4	9.6	7.9	18.8	17.9	10	0.7	6.2	1.6	0.9	0	0	0.2	0.2	7.2	4.7	1.4	3.8	0	0	2.4	3.7	5.9
1998-02-26	0	0	0	0.4	0	4	0.2	0	0	0	0.1	0	0.1	0.5	0	0.1	0	0.4	0	0	0.1	0	0.6	0.6	0.1	1.2	0.5	0.7	5.4	1.6	1.9	1.1	3	7.8	0.9	27.2	2	0.7	7.7	0.9	1.6	14.8	3	1.3	0.3	0.4	0	0	0
1998-02-27	0	0.6	0.6	7.4	0	0	0	0	0	0	0.3	0	0	0	0	0	0	0	0	0	0.3	0	0	0	0	0	0.9	0.4	0.4	53.6	80	2.7	0.6	8	0	34.1	14	1.9	4.5	7.5	7.1	0.7	0	0.5	0.1	0.6	0	0	0
1998-02-28	0	4.3	0	0.3	0.2	0.1	3.9	0	0	0	3.8	0.3	1.4	0	0	0.3	0.3	0.4	0	0	0	0.3	0.5	0.5	1.4	0.7	0	10.9	2	4.8	2.9	15.5	3.4	0.2	0	0	0	0	0.7	1.9	10.1	2.3	2.2	4.4	0	0	0	0	0.3
1998-03-01	0	0.2	0	0	0	0	0.6	0	0	0	9.9	0.2	2.6	0.1	0.1	0.8	0.2	2.4	0	0	0.4	1.2	1.5	1.5	2.6	2.3	0	12.8	21.6	1.5	7	0.5	1	0.3	0	0	0	0	0	0	0.2	0	0.7	2.4	0	0	0.1	0	1.2
1998-03-02	0.5	0.1	0	0.2	0	0.1	0	0	0	0	0	0	0	0	0	0	0	0	0	0	0	0	0.1	0.1	0	0.3	0	0	0.1	0	0	0	0.1	0	24.5	0	1.5	23.3	0	1.3	0	0	0	18.5	0.2	0.1	0	0	0
1998-03-03	5.1	0	1.3	0	0	0.2	0	0	0	0	2.2	0	0	0.4	0	0.4	0	0.4	0	0	0	0	0.4	0.4	0	0.8	0	3.2	1.6	14.3	7.5	2.9	0	0	4.5	0.1	1.4	4.4	0	0	17.1	0	1.4	23.1	0.1	0	0	0	0
1998-03-04	2.8	1.7	14.1	0.2	0	0	0	0	0	3	1	0	0.3	0.1	0	0.6	0	1	0	0	0	0	0	0	0.3	0.1	0	0.5	5.3	7.5	7.1	2	1.6	3.4	0.7	1.4	14.5	15.8	0	0	14	0	0	11.8	0	0	0	0	0
1998-03-05	0	0	0	0	0.3	0	0	0	0.1	0	0	0	0	0	0	0	0	0	0	0	0	0	0	0	0	0	0	0	0.6	4.7	3.6	0.3	0.1	2.6	0.5	0.8	2.3	7	0.5	0	2.1	0	3.1	18.9	0	0.3	0	0	0
1998-03-06	0	0	0	0	0.2	0	0	0	0	0	1.1	0	0	0	0	0	0	0	0	0	0	0	0	0	0	0	0	0	3.6	0.4	0.2	0	4	0	3.1	5.8	4	5.3	11.4	16.4	0.3	0	0.3	0	0	0	0	0	0
1998-03-07	0.2	0.1	0.1	0	0	0.2	0	0	0	0	0.2	0	0	0.4	0	0	0	0	0	0	0	0	0	0	0	0	2.8	0.7	0.2	1.3	0.3	0.8	7.4	4.7	1.4	2	1.8	1.6	0	3.9	3.6	0.3	0.1	0	0	0	0	0	0
1998-03-08	0	0	0	0	0	0.4	0.1	0.7	0	0	2	7.5	3.2	0	0	11.4	7.5	0.9	0	0	0	6.9	3.5	3.5	3.2	1.2	11.1	4.8	2.1	1.2	0.5	2.4	1.1	2.1	5	28.6	11.1	1.1	1.8	2.5	1.2	0	0.8	12.5	0	0	0	0	6.9
1998-03-09	0	0.3	0	0	0	4	6.6	6	0	0.3	1.1	9.2	33.2	9.9	1.3	30.2	9.2	17.6	0	1.4	3.2	10.1	14	14	33.2	32.8	1.3	0.2	4.1	0.9	0.9	3.2	8	0.3	11.6	43.3	2.6	1.8	26.2	0.9	0.2	0	13	20.4	0	0	1.3	1.4	10.1
1998-03-10	0.2	0	0.5	0.2	0	0.4	24.8	1.2	2.2	1.4	6.9	0.3	0.8	2.2	14.5	1.4	0.3	2.7	12.6	9	1.1	0.7	0.8	0.8	0.8	0.7	13	0.9	1.4	0.7	0.3	0.3	16.9	0.4	39.9	10.9	0.5	1.7	1	3.2	3	0	0.3	5.1	0	0.4	14.5	9	0.7
1998-03-11	1.1	0	4.4	0.1	0.2	0.6	5.6	7.8	4.9	16.1	10	5.4	2.5	9.1	9.2	3.9	5.4	8.8	7.9	18.6	4.8	2.9	4.3	4.3	2.5	2.6	58.4	19.8	4.1	16.5	9.6	4.1	0.6	0.1	5.3	4.5	0.7	0.4	0	2.2	24.2	0	1.1	15.8	4.3	1.7	9.2	18.6	2.9
1998-03-12	0.1	0.2	0	0	13.4	22.4	5.3	3.9	10.5	0.8	5.5	2.6	2.8	0.6	6.8	4	2.6	5.4	13.2	6.4	1.7	2.7	1.8	1.8	2.8	1.5	11.8	11.9	4.3	6.8	2.6	9.3	14.3	3.6	9.9	25.2	2	1	0.2	6.1	7	0.2	3	0.4	4.1	2.1	6.8	6.4	2.7
1998-03-13	5.6	17.5	20.8	13.1	62.2	54.3	17.7	6.7	21.7	11.5	2.4	3	4	8.7	3.1	5.2	3	3.7	9.2	0.7	4.5	1.5	1.4	1.4	4	1.4	2.8	1	1.6	15.9	5.3	11.4	12	15.9	1.1	1.1	0.6	8.3	0.6	0.7	25.6	13.7	0.2	0.4	27	5.8	3.1	0.7	1.5
1998-03-14	5.6	3.1	5.4	4.5	8.5	1.1	10.8	14.3	28.4	2.4	0.4	15.9	3.9	5.6	12.7	0.4	15.9	1.3	25.9	11.7	14.1	17.9	8.2	8.2	3.9	4.6	0	0.3	0	0	0	0	1.2	2.8	0.3	1.4	3	4.1	1	4.7	0.2	1.4	1.1	0.2	0.6	1.1	12.7	11.7	17.9
1998-03-15	0.1	4.6	0.2	0.1	0	22.4	3.8	11.5	1.6	1	23.4	17.1	16.2	16.7	23.2	23.5	17.1	38.1	7.1	18.5	24.9	22.6	4.9	4.9	16.2	11.8	2.9	7.1	1.6	0.6	0.5	8.1	1.4	0.3	0.8	0.1	0.1	0	0.7	0.2	4.1	0	5.4	0	0	0	23.2	18.5	22.6
1998-03-16	9.6	13.2	9.4	3.9	7.8	3.3	0.1	3.4	3.5	6.7	0	1.8	1.9	1.7	2.6	2.4	1.8	0.8	10.4	1	0	0.9	0.6	0.6	1.9	0.8	0	0	0	0.2	1.2	2.5	4.9	0.6	0	1.2	0	0	0.5	2.3	0.9	0	3.8	5.2	0	0	2.6	1	0.9
1998-03-17	13.5	20.3	16.8	18.3	0.3	0.9	18.2	0	0	3.4	0	0	0	0.4	0	0	0	0	0	0	0	0	0	0	0	0.1	0	0	0	0	0	0.6	0.2	0.2	1.3	1	0.4	0.1	0	0.1	2.4	6.2	0.5	14.3	2.2	0.3	0	0	0
1998-03-18	1.2	3.8	6.1	20.7	0	0	1.3	0	0	0	0.3	0	0	0.1	0	0	0	0	0	0	0	0	0	0	0	0	0.4	0.1	0.5	0.2	0.1	0.1	0	2.3	7.8	3.9	0.6	0	0	0	0.2	1.3	30.4	5.7	0	2	0	0	0
1998-03-19	0.3	1.2	0.1	0.6	0	1.7	0.1	1.1	0	0	0.7	3.7	8.2	3.6	0.3	8.5	3.7	1.9	0.3	0.6	18.6	8.8	15.7	15.7	8.2	10.6	0	0	0.3	0	0	0	0	0	0	0	0.2	2.5	1.2	0.3	0	3.4	4.6	7.5	2.8	0	0.3	0.6	8.8
1998-03-20	0	0.3	0	0	1.4	19.8	2.4	0	0.7	0	0.1	0	2	0.5	0	2.1	0	2.6	0.1	0	0	0	0.1	0.1	2	1.5	0.2	0	0	1.8	4.5	0.1	0	0.9	0	0.7	4.6	2.7	2.4	0	0.4	0.8	1.4	8.7	0	0	0	0	0
1998-03-21	0	0	0	0	3	2.4	0	0	22.9	0	0	0	0.7	0	0	1.1	0	0.1	0	0	0	0	0.2	0.2	0.7	0.7	0	0	0	0.9	0.9	1.9	0.4	0	0	0.1	0	0.4	18.8	2.7	1.3	15.2	12.1	3.3	0	0	0	0	0
1998-03-22	0	0	0	0	1	65.8	0.5	0	4.1	0	3.9	0	0.3	20.8	0.1	0.1	0	0.2	0	0	8.1	0.4	0.4	0.4	0.3	4	0	2.1	0.5	3.1	2.2	1.7	2.1	1.4	0	0.2	0.1	0	6.1	0.4	5.6	2	0	0.2	0	0	0.1	0	0.4
1998-03-23	0.2	0	0	0	2.1	6.2	0	2.5	0.1	0	2.5	3.2	5.4	6.9	0.4	0.6	3.2	0.1	0	0.4	7.3	3.9	3.1	3.1	5.4	8.7	0.1	0	0.5	4.8	2.1	4	0.7	0.1	0.8	5.2	0.1	0	1	15.1	12.3	0	0	0	0	0	0.4	0.4	3.9
1998-03-24	0	0.1	0	0	3.4	0.1	0.9	0.5	0	0	0.7	0.7	0.5	1	0.4	0.3	0.7	0.6	0.4	0.4	0.9	0.8	0.7	0.7	0.5	0.6	0.1	0	0.2	4.5	2.9	0	1.6	0.1	0.6	0.2	0.3	0	1.8	11.9	6.9	0	0.4	0	0	0	0.4	0.4	0.8
1998-03-25	0	0	0	0	0	0	0	0	0	0	1.1	0	0	0.3	0	0	0	0.3	0	0	0	0	0	0	0	0	0.2	0.3	0.2	0	0	0	0.2	0	0	0	0.1	0.2	0.4	0.5	0	0	2.4	9.5	0	0	0	0	0
1998-03-26	0.1	0	0	0	0	0.4	0.6	0	0	0	0.1	0	0.1	0	0	0	0	0.2	0	0	0.5	0	0.2	0.2	0.1	0.1	0	0.1	0	0.1	0.2	0.2	3.5	0	0	0	0	0	0.1	0.1	0.1	0	0.4	0	0.3	0.1	0	0	0
1998-03-27	0.3	0	0	0	0	2.2	0.4	0	0	0	0	0	0	0	0	0	0	0	0	0	0	0	0	0	0	0	0.3	0.2	0.6	0.5	0.3	0.4	0.7	5.1	1.2	0.2	0.2	0.2	14.5	25.9	0.8	0	1.7	0.9	1.1	0.4	0	0	0
1998-03-28	0.5	0	0	0	0	1.3	10.7	0	0	0	0.1	0	0	0	0	0.3	0	1.1	0	0	0	0	0	0	0	0	0	0	0.3	0.9	0.6	0	0.4	0.3	0.8	2.3	0.3	0.2	1.7	4.9	1.6	0.9	1.1	1.9	0	0	0	0	0
1998-03-29	0	0	0	0	0	0.1	0	0	0	0	0.1	0	0.8	0	0	0.1	0	0.6	0	0	0.1	0	0	0	0.8	1	0	0	0	0	0	0	0.1	0	0	0	0	0	0	0.4	9.1	0.6	0.9	0.8	0	0	0	0	0
1998-03-30	0	0	0	0	0.3	0	0.7	0	0	0	0	0	0	0	0	0	0	1.2	0	0	0	0	0	0	0	0.1	0	0	0	2.3	0.8	0.1	0.2	11.8	0.1	1	0.2	0	0.3	0.7	7	1.6	3.4	3	0	0	0	0	0
1998-03-31	0	0	0	0	0	0.2	0	0	0	0	0	0	0	1	0	0	0	0	0	0	0	0	0	0	0	0	1.4	0.7	0	0	0	0.3	0	0	1.3	1.1	0.6	0.2	5.6	0.1	0	0	1.2	0.7	0	0	0	0	0
1998-04-01	0	0	0	0	0	0	0	0	0	0	0	0	0	0	0	0	0	0	0	0	0	0	0	0	0	0	0	0	0	0	0	0	0	0	0	0	1.2	2	1.3	0.1	0	0	0	0.6	8.1	0.3	0	0	0
1998-04-02	0	0	0	0	0	0	0	0	0	0	0	0	0	0	0	0	0	0	0	0	0	0	0	0	0	0	0.6	0	0	0	0	0	0	0	0	0.3	0.3	0.2	0.6	0	0	0	0	0.8	49.5	20.1	0	0	0
1998-04-03	0	0	0	0	0	4.2	0	0	0	0	0.4	0	0	0	0	0	0	0.7	0	0	0	0	0	0	0	0	0	0.6	0	0	0	1.8	0.5	0	0.7	2.7	13.4	13.3	0.3	0.2	0	0	0	0	0.6	0.4	0	0	0
1998-04-04	0	0	0	0	0.5	0.1	0	0	0	0	0.1	0	0	0	0	0	0	0	0	0	0	0	0	0	0	0	0	3.9	3.4	10.6	15.2	1.2	1.4	1	0.7	1.5	5.3	16.6	2.5	0.2	2.3	0	0	0	0	0	0	0	0
1998-04-05	0	0	0	0	0	1	0	0	0	0	0	0	0.3	2.4	0	0	0	0	0	0	0	0	0	0	0.3	0	0	0.2	0	0.4	0	0.6	1.5	1	13.5	9.2	9.2	6.5	25.8	19.9	0.1	0	0	0	2.2	0	0	0	0
1998-04-06	0	0	0	0	0	1.7	0	0.6	0	0	0.2	2.1	1.9	0.5	0	0.4	2.1	0.2	0	0	14.6	4.5	2.8	2.8	1.9	2.6	0	0	1.2	1.4	1.1	0.1	0.2	7.1	24.3	8.9	1.3	0.9	14.3	25.5	0.9	2.2	0	0	0	0.1	0	0	4.5
1998-04-07	0	0	0	0	0	1.3	0.2	0	0	0	1.3	0.3	0	9.4	28.4	0	0.3	2.9	37.1	41.5	8.5	1.2	0.1	0.1	0	0.3	2.6	1.8	0.6	0.7	0.9	1.3	0.1	1.9	10.1	22	16.5	3.2	0.3	0	0.4	0.4	0	0	0	0	28.4	41.5	1.2
1998-04-08	0	0	0	0	0	1.2	0	0	0	0	6.7	0.1	0.2	1.3	0	0.2	0.1	2.8	0	0	0	0.7	0	0	0.2	0.1	3.2	6.2	18.9	8.4	7.5	4.7	0	0.2	2.4	0.8	2.5	3.9	2	0.1	11.3	0	8.1	0	0	0	0	0	0.7
1998-04-09	0	0	0	0	0.1	4.6	0.1	1.3	0	0.8	0.9	1.8	0	1.7	0	0	1.8	0	0	0.1	3.5	0.8	0	0	0	0	0.4	0.5	1.2	3.4	2.5	1.8	0.1	3.4	10.1	6.3	6.3	8.9	1.6	1	3.1	0.1	3.1	0	0.2	0	0	0.1	0.8
1998-04-10	0	0	0	0	0	0.5	0	0	0.7	0	0	0	0	0	0	0	0	0	0	0	0	0	0	0	0	0	0.3	0	0	0	0	0.1	0	0	0.2	20	8	1.2	6.1	1.5	0	0.7	0	0.4	0	0	0	0	0
1998-04-11	0.3	0.1	0.2	0	0	0.9	0	0	0	0	0	0	0	0	0	0	0	0	0	0	0	0	0	0	0	0	0.1	0.3	0	0	0	0.3	0	0	0.2	0	0	0	0.9	2.4	0	0	7.8	2.1	0	0	0	0	0
1998-04-12	0	0	0	0	0	5	0	0	0	0	0	0	0	0	0	0	0	0	0	0	0	0	0	0	0	0	0.1	1	0	0	0	1.3	0	0	0	0	0	0	0.2	3.6	0	0	12.8	0.9	0	0	0	0	0
1998-04-13	0	0	0	0	0	0.1	0	0	0	0	0	0	0	0	0	0	0	0	0	0	0.1	0	0	0	0	0	0	0.5	0.1	0	0	0.3	0	0	0	0	0.3	0.5	8.3	12.2	0	0	0.6	0.2	0	0	0	0	0
1998-04-14	0	0	0	0	0	0	0	0	0	0	0	0	0	0	0	0	0	0	0	0	0	0	0	0	0	0	0	0	0	0	0	0.3	0	0	4.3	3.1	0.3	0.8	19.8	41	0	0	2.9	1.4	0	0	0	0	0
1998-04-15	0	0	0	0	0	1.2	0	0	0	0	0	0	0	0	0	0	0	0	0	0	0	0	0	0	0	0	0.4	0	0	0	0	0	2.9	0	1.3	5	0.1	0	22	74.5	0	0	0	0	0	0	0	0	0
1998-04-16	0	0	0	0	0.2	3.1	0	0	0.6	0	0.1	0	0	0.1	0	0	0	0	0.1	0.1	0	0	0	0	0	0	0.8	0.1	0	0	0	0	0.1	0	0	5.9	3.8	4.3	21.1	10.4	0	0	0	0	0	0	0	0.1	0
1998-04-17	0	0	0	0	0.1	1.3	0	0.1	0.9	0.1	0	0	0	0.1	0.6	0	0	0	0.7	0.7	0.3	0	0	0	0	0	0	0	0	0	0	0	0	0	0	0	0	0	2.5	0.5	0	0	0	0.1	0	0	0.6	0.7	0
1998-04-18	0.1	0.2	0.4	0	0	0.9	0	0	0.1	0	0.1	0.1	0	0	0.1	0	0.1	0	0.1	0	0	0	0	0	0	0	0.3	0.4	0	0	0	0.1	0.2	0	0.1	0	0	0	0	0	0	0	0	0	0	0	0.1	0	0
1998-04-19	0.2	0.2	0.4	0	0	0.4	0	0	0	0	0	0	0	0.9	0	0	0	0	0	0	0	0	0	0	0	0	2	0.8	0	0	0	0.3	0	0	0.1	0	0	0	0	0	0	0	0	0	0	0	0	0	0
1998-04-20	0	0	0	0	0	0	0	0	0	0	0	0	0	0.1	0	0	0	0	0	0	0	0	0	0	0	0	3	0.3	0	0	0	0.8	0	0.2	0	0	0	0	0	0	0	0	0	0	0	0	0	0	0
1998-04-21	0	0	0	0	0	0.6	0	0	0	0	0	0	0	2.1	0	0	0	0	0	0	0	0	0	0	0	0	2.1	2	0	0	0	0.2	0	0	0	0	0	0	0	0	0	0	0	0	0	0.2	0	0	0
1998-04-22	0.1	0	0	0	0	0	0	0	0	0	0.4	0	0	0	0	0	0	0.3	0	0	0	0	0	0	0	0	0	0	0.1	0	0	0	0	0	0	0	0	0	0	0	0	0	0	0	0	0.1	0	0	0
1998-04-23	0	0.5	0	0	0	0	0	0	0	0	0.2	0	0	0	0	0	0	0	0	0	0	0	0	0	0	0	0	0	0.1	0	0	0	0	0	0	0	0	0	0	0	0	0	0	0	0	0	0	0	0
1998-04-24	0.1	0	0	0	0	0	0	0	0	0	0	0	0	0	0	0	0	0	0	0	2.4	0	0	0	0	0	0.2	0	0.1	0.1	0.1	0.1	0	0	0	0	0	0	0	0	0	0	0	0	0	0	0	0	0
1998-04-25
1998-04-26	0	0.2	0	0	0	0.1	0	0	0	0	0	0	0	0	0	0	0	0	0	0	0	0	0	0	0	0	0	0	0.1	0	0	0	0	0	0	0.1	0	0	0	0.1	0	0	0	0	0	0	0	0	0
1998-04-27	0.2	0.5	0.1	0	0	0	0	0	0	0	1.1	0	0	3.4	0	0	0	0	0	0	0	0	0	0	0	0	0.1	0.1	0.1	0	0.1	0.1	0	0	0	0	0.1	0.1	0	0	0	0	0	0	0	0	0	0	0
1998-04-28	0	0.2	0	0	0	0.8	0	0	0	0	0.8	0	0	0.2	0	0	0	0	0	0	0	0	0	0	0	0	0	0.2	0.2	0	0	0.2	0	0	0.1	0.3	0	0	0	0	0	0	0	0	0.1	0.1	0	0	0
1998-04-29	0	0	0	0	0	1.4	0	0	0	0	0	0	0	1.4	0	0	0	0	0	0	2.4	0	0	0	0	0	0.1	0.2	0	0	0	0.1	0	0	0	0	0	0	0	0	0	0	0	0	0	0	0	0	0
1998-04-30	0	0.1	0	0	0	2.9	0	0	0	0	0	0	0	0.1	0	0	0	0	0	0	0.6	0	0	0	0	0	0.1	0.4	0	0	0	0.4	0	0	0	0	0	0	0	0	0	0	0	0	0	0	0	0	0
1998-05-01	0	0	0	0	0	0	0	0	0	0	0	0	0	0	0	0	0	0	0	0	0	0	0	0	0	0	0	0	0	0	0	0	0	0	0	0	2.5	1.5	0	0	0	0	0	0	0	0	0	0	0
1998-05-02	0	0	0	0	0	0	0	0	0	0	0	0	0	0	0	0	0	0	0	0	0	0	0	0	0	0	0	0	0	0	0	0	0	0	0	0	0	0	0	0	0	0	0	0	0	0	0	0	0
1998-05-03	0	0	0	0	0	0	0	0	0	0	0.1	0	0	0	0	0	0	0	0	0	0	0	0	0	0	0	0	0	0	0	0	0	0	0	0	0	0	0	0	0	0	0	0	0	0	0	0	0	0
1998-05-04	0	0	0	0	0	0	0	0	0	0	0.4	0	0.2	8.4	0	0	0	0.9	0	0	0	0	0	0	0.2	0.4	0	0.1	0	0	0	0.8	0	0	0	0	0	0	0	0.1	0	0	0	0	0	0	0	0	0
1998-05-05	0	0.3	0	0	0	0	0	0	0	0	0	0	0.2	1.4	0	0	0	0	0	0	1.8	0	0	0	0.2	0	0	4.8	0.1	0	0	0	0	0	0	0	0	0	0	0	0	0	0	0	0	0	0	0	0
1998-05-06	0	0.2	0	0	0	6.2	0	0	0	0	1.7	0	0	0.5	0	0	0	0	0	0	0.9	0	0	0	0	0	1.3	12.3	1.8	0	0	2.1	0	0	0	0	0	0	0	0	0	0	0	0	0.9	0.2	0	0	0
1998-05-07	0	0	0	0	0	0	0	0	0	0	1.4	0	0	1.1	0	0	0	0	0	0	1.1	0	0	0	0	0	4.3	0.2	0	0	0	8.9	0	0	0	0	0	0	0	0	0	0	0	0	0	0	0	0	0
1998-05-08	0	0	0	0	0	0.2	0	0	0	0	1.6	0	0	0	0	0	0	0	0	0	1.1	0	0	0	0	0	0	1.9	0	0.1	0	0	0	0	0	0	0	0	0	0	0	0	0	0	0	0	0	0	0
1998-05-09	0	0	0	0	0	3.9	0	0	0	0	0	0	0.1	0	0	0	0	0	0	0	0.3	0	0	0	0.1	0.5	0	0.3	0	0	0	5.4	0	0	0	0	0	0	0	0	0	0	0	0	0	0	0	0	0
1998-05-10	0	0	0	0.1	0	0	0	0	0	0	0	0	0	0	0	0	0	0	0	0	0	0.1	0.1	0.1	0	0.1	0	0	0	0	0	0	0	0	0	0	0	0	0	0	0	0	0	0	0	0	0	0	0.1
1998-05-11	0	0	0	0	0	0	0	0	0	0	0	0	0	0.9	0	0	0	0	0	0	0	0	0	0	0	0	1.7	0	0.5	0	0	0	0	0	0	0.3	0	0	0	0	0	0	0	0	0.1	0	0	0	0
1998-05-12	0	0	0	0	0	5.5	0	0	0	0	0.2	0	0	8.7	0	0	0	0	0	0	3.9	0	0	0	0	0	2.7	0.6	0	0	0.5	0	0	0	0	0	0	0	1.4	0.5	0	0	0	0	0.1	0	0	0	0
1998-05-13	0	0.1	0	0	0.3	0.4	0	0	0	0	5.6	0	0.7	5.7	0	0	0	0	0	0	3.6	0.1	0.3	0.3	0.7	1.8	10.3	13.4	0.7	0.2	0.8	4.8	2.8	0.4	1.1	0	0	0	0.1	0.6	0	0	0	0	0.1	0	0	0	0.1
1998-05-14	0	0.1	0	0	0	4.6	0	0	0.1	0	0.4	0	0	7.9	0	0	0	0	0	0	4.2	0	0	0	0	0.1	19.2	9.8	0	0	0	8.2	2.6	0.2	0	0	0.3	0.5	0	0	0	0	0	0	0	0	0	0	0
1998-05-15	0.2	0	0	0	0	1.2	0	0	0.1	0	0.9	0	0	10.9	0	0	0	0	0	0	17.5	0	0	0	0	0.3	7.3	9.3	0.4	0	0.1	5.4	2.3	0	0.5	1.4	0.4	0.1	1.2	0	0	0.1	0	0	0	0	0	0	0
1998-05-16	0.1	0	0.1	0	0	0.1	0	0	0.1	0	6.1	0.2	1	3.6	0.2	0	0.2	0	0.2	0	8.5	0.9	1.5	1.5	1	2.2	13.1	0.6	0	0.2	0.1	1.9	12.2	0	1.6	0.2	0.1	0.1	0	0	0	0	0	0	0	0	0.2	0	0.9
1998-05-17	0	0.2	0	0	0.2	2.9	0	0	0	0	0	0.1	0	4.1	0	0	0.1	0	0.2	0	1.6	0.2	0	0	0	0.1	0.1	6.7	0	0	0	4.6	3.5	0	0.2	0	0	0	0.5	0	0	0	0	0	0	0	0	0	0.2
1998-05-18	0	0	0	0	0	1.8	0	0	0	0	0	0	0	4.4	0	0	0	0.8	0	0	0	0	0	0	0	0	0	0	1.5	0	0	0	0	0	0	0	0	0	0	0	0	0	0	0	0	0	0	0	0
1998-05-19	0.1	0	0	0	0	0	0	0	0	0	0.6	0	0	1.3	0	0	0	0	0	0	2.6	0	0	0	0	0.2	0.2	5.6	0.2	0	0.4	6	0	0.8	0	1.6	0.4	0.2	0	0.3	0	0	0	0	0	0	0	0	0
1998-05-20	0	0.2	0	0	0	1	0	0	0	0	0	0	0	4.1	0	0	0	0	0	0	1.6	0	0	0	0	0	7.2	20.7	0.2	0.5	1	13.1	0	0.1	0	2.2	0.1	0.1	0	0	0.1	0	0	0	0	0	0	0	0
1998-05-21	0	0.1	0	0	0	1.1	0	0	0	0	0	0	0	7.1	0	0	0	0	0	0	2.7	0	0	0	0	0	20.8	18.8	0	0.2	1	12.6	0	0	0	2.4	0.5	0	0	0	0	0	0	0	0	0.2	0	0	0
1998-05-22	0	0	0	0	0.1	2	0	0	0	0	0.1	0	0	0.4	0	0	0	0	0	0	0	0	0	0	0	0.4	9.3	14.9	0	0	0	5.6	0	0	0	0.8	0.4	0	0	0	0	0	0	0	0	0.2	0	0	0
1998-05-23	0	0	0	0	0	2.8	0	0	0	0	0	0	0.4	0.3	0	0	0	0	0	0	0.7	0.4	0.4	0.4	0.4	0.2	4.8	8	0	0	0	3.7	0	0	0.1	0	0.2	0	0	0	0	0	0	0	0	0	0	0	0.4
1998-05-24	0	0	0	0	0	0	0	0	0.7	0	0	0	0	0.1	0.6	0	0	0.2	1.3	0	4.3	0	0	0	0	0	11.9	7.8	0	0	0	3.7	1.2	0	0	0.5	0.6	0.1	2.3	0.2	0	0.1	0	0	0	0	0.6	0	0
1998-05-25	0	0.1	0	0	0	0	0	0	0	0.4	0	0	0	3.2	0	0	0	0	0	0	1.2	0	0	0	0	0	6.1	5.8	0	0	0	3.1	0	0	0.7	5.7	0	0	2.6	1.6	0	0.1	0	0	0.1	0	0	0	0
1998-05-26	0.1	0.1	0	0	0	0	0	0	0	0	0	0	0	0.8	0	0	0	0	0	0	9.6	0	0	0	0	0	6.9	9	0	0	0	6.2	0.5	0	0	0.7	1.4	0.4	0.1	1.3	0	0.1	0	0	0	0	0	0	0
1998-05-27	0	0	0	0	0	0.2	0	0	0	0	0	0	0	5.7	0	0	0	0	0	0	16.1	0	0	0	0	0	15.2	6	0	0	0	2.6	1.4	0.1	0	7.4	2	1.1	2.3	0	0	0	0	0	0	0	0	0	0
1998-05-28	0.1	0.1	0	0	0	0	0	0	0	0	0	0	0	0.2	0	0	0	0	0	0	0	0	0	0	0	0	15.4	14.7	0	0	0.2	2	1.5	0	0	6.1	2.9	0	3.2	9.6	0	0.1	0	0	0	0	0	0	0
1998-05-29	0.1	0.2	0	0	0	0	0	0	0	0	2.6	0	0	39.6	0	0	0	0	0	0	0	0	0	0	0	0	12.5	7	1.3	0.2	0.2	0.5	0	0.2	0.1	0	0	2	1.1	0	0	0	0	0	0.2	0	0	0	0
1998-05-30	0.2	0	0	0	0	1.2	0	0	0	0	0.3	0	0	0.5	0	0	0	0	0	0	0	0	0	0	0	0	3	3.9	1.2	0.5	0.8	3	0.1	0.1	0	0	0	0	0	0	0	0.2	0	0	0.2	0.1	0	0	0
1998-05-31	0	0.1	0	0	0	0	0	0	0	0	0	0	0	15.6	0	0	0	0	0	0	0	0	0	0	0	0	7.2	1.1	0.4	0	0	0.1	0	0	0	0	0	0	2	0	0.1	0.1	0	0	0	0.1	0	0	0
1998-06-01	0	0	0	0	0	0	0	0	0	0	0	0	0	6.6	0	0	0	0	0	0	0.8	0	0	0	0	0	0.4	0	0	0	0	23.3	0	0	0	0	0	0	0.1	0	0	0	0	0	0.1	0	0	0	0
1998-06-02	0	0	0	0.1	0.2	0	0	0	0	0	0	0	0	4.7	0	0	0	0	0	0	3	0	0	0	0	0.1	2.5	7.6	0	0	0	10.2	0	0	0	0	0	0	0	0	0	0.2	0	0	0.1	0	0	0	0
1998-06-03	0	0	0	0	0	0	0	0	0	0	0	0	0	1.3	0	0	0	0	0	0	18.3	0	0.1	0.1	0	1.9	2.5	2.5	0	0	0.2	6.5	0	0.3	0	0	0	0	0	1.9	0	0	0	0	0	0	0	0	0
1998-06-04	0	0	0	0	0	0	0	0	0	0	8.8	0	0	13.5	0	0	0	0	0	0	3.7	0	0.5	0.5	0	1.6	4.7	12.3	1.2	1.3	4.7	6	11.7	3.8	5.5	2.9	0	0	0	0	0	0	0	0	0	0	0	0	0
1998-06-05	0	0	0	0	0	17.2	0	0	0	0	0.2	0	0	4.7	0	0	0	0	0	0	0	0.2	0.9	0.9	0	0.1	0	0	0	1.7	0.7	0	0	3.9	1	9.2	0.9	0	5.3	0.6	0.5	0	0	0	0	0	0	0	0.2
1998-06-06	0	0	0	0.1	0	8.3	0	0	0	0	0	0	0	9.9	0	0	0	0	0	0	0	0	0	0	0	0	20.4	0.2	0	0	0	28.3	7.7	0	0	0.1	0.3	0	4.2	4.4	0	0	0	0	0	0	0	0	0
1998-06-07	0	0.1	0	0	0	0.1	0	0	3	0	8.5	0	0	4	0	0	0	0	0	0	0	0	0	0	0	0	1.5	12.4	8.8	0	0.7	7.9	5.7	1.4	2.7	0.1	0.2	0	0	1.9	0	0	0	0	0	0	0	0	0
1998-06-08	0	0.3	0	0	0	1.1	0	0	0	0	0	0	0	0.4	0	0	0	0	0	0	0	0	0	0	0	0	3.3	9.5	0	0.7	1	4	0	0.2	0.8	0	0	0	0	0	0.1	0	0	0	0.1	0	0	0	0
1998-06-09	0.1	0.1	0	0	0.3	0.5	0	0	0	0	0	0	0	0	0	0	0	0	0	0	0	0	0	0	0	0	14.7	3.6	0.1	0.1	0.9	2.6	0	0.1	0.6	0	0.7	0.8	5.7	1.3	0	0.1	0	0	0	0	0	0	0
1998-06-10	0	0.1	0	0	0.6	0	0	0	0	0	0	0	0	0	0	0	0	0	0	0	0	0	0	0	0	0	1.9	1.2	0	0	0	1.2	0.6	0	0	1.7	1.3	0.4	6.3	2.5	0	0	0	0	0	0	0	0	0
1998-06-11	0	0	0	0	0	1.7	0	0	0	0	2.1	0	0.1	9.5	0	0	0	0	0.1	0	2.4	0	0	0	0.1	0.7	9.4	22.3	0	0	0	10.3	7.5	0	0	0	1.6	1.9	2.8	0	0	0	0	0	0	0	0	0	0
1998-06-12	0	0	0	0	0	1.6	0	0	0	0	0	0	0	1.9	0	0	0	0	0	0	4.5	0	0	0	0	0	19.7	9.7	0.2	0	0	11	4.3	0	0.3	8.8	6.2	3.3	8.2	1.5	0	0.2	0	0	0	0	0	0	0
1998-06-13	0	0	0	0	0	0	0	0	0	0.2	6.6	0	0	12.1	0	0	0	0	0	0	0	0	0	0	0	0	11.9	10.7	1.7	0	0.1	7.8	0.1	0	1.7	1.2	0.7	0.1	0	1.1	0	0	0	0	0	0	0	0	0
1998-06-14	0	0	0	0	0	4.1	0	0	0	0	1.9	0	0	18.7	0	0	0	0	0	0	0	0	0	0	0	0	0.1	1.1	1.1	0	0	1.3	0	0	0	1.9	0.5	0	0	3.8	0	0.1	0	0	0	0	0	0	0
1998-06-15	0.1	0.1	0	0	0	23.5	0	0	0	0	1.6	0	0.2	17.9	0	0	0	1.4	0	0	0	0	0	0	0.2	0	10.8	16.7	4	0	0.3	7.3	0	0	2.2	10.5	4.1	0.5	3.1	0	0	0	0	0	0	0	0	0	0
1998-06-16	0	0	0	0	0	14.3	0	0	0	0	2.8	0	0	1.1	0	0	0	0	0	0	0	0	0	0	0	0	10.1	13	0	0.1	0.3	8.6	0	0	0	1.2	0.7	0.3	2	0	0	0.2	0	0	0	0	0	0	0
1998-06-17	0	0.1	0	0.1	0	3.3	0	0	0	0	0	0	0	0.5	0	0	0	0	0	0	0.7	0	0	0	0	0	5.2	7.6	0	0	0	3.2	1.5	0	0	0	0.1	0	0.4	0	0	0	0	0	0.3	0.1	0	0	0
1998-06-18	0	0	0	0	0	6.6	0	0	0	0	1.8	0	0	17.6	0	0	0	0.7	0	0	5.1	0	0	0	0	0	13.1	26.5	0	0	0	5	2.2	0	0.5	5	0	0	1	0	0	0.3	0	0	0	0	0	0	0
1998-06-19	0.1	0	0	0	0	0	0	0	0	0.5	1.3	0	0	17.3	0	0	0	1.9	0	0	0.8	0	0	0	0	0.4	8	9.6	0	0	0	0.3	0	0.1	0	0	0	0	1.4	0.6	0	0.2	0	0	0	0	0	0	0
1998-06-20	0	0.4	0	0	0	0.1	0	0	0	0	0	0	0	21.3	0	0	0	4.2	0	0	0	0	0	0	0	0	0	7.7	0	0	0	0	0	0	0	0	0	0	0	0	0	0	0	0	0	0	0	0	0
1998-06-21	0	0	0	0	0	0	0	0	0	0	0	0	0.1	4.9	0	0	0	5.9	0	0	0	0	0	0	0.1	0.5	0.8	2.4	0	0	0	1.9	0	0	0.3	0	0	0	0	0	0	0	0	0	0	0	0	0	0
1998-06-22	0	0	0	0	0.2	0.2	0	0	0	0	0	0	0	0	0	0	0	0	0	0	0	0	0	0	0	0	5.3	10.3	0	0	0	1.8	0	0	0	0.3	0.1	0	0	0.4	0	0	0	0	0	0	0	0	0
1998-06-23	0.1	0	0.1	0	0	1	0	0	0	0	0.3	0	0	0.2	0	0.1	0	0	0	0	0	0	0	0	0	0	14.4	7.1	0	0	0	2.6	0	0.1	0	0	0	0	0.9	0	0	0	0	0	0	0	0	0	0
1998-06-24
1998-06-25	0	0.3	0	0	0	0	0	0	0	0	0.1	0	1	1.7	0	0.6	0	0.4	0	0	0	0	0	0	1	1.5	14.4	15.6	0	0	0	2.1	0	0	0	0.4	0.7	0	2.3	0	0	0	0	0	0	0	0	0	0
1998-06-26	0	0.3	0	0	0	0	0	0	0	0	0	0	0	4	0	0	0	0	0	0	0	0	0	0	0	0	2.9	6	0.2	0.2	0.6	0.1	0	0	0.2	0.3	0	0	1.6	3.3	0	0.1	0	0	0	0	0	0	0
1998-06-27	0.1	0.1	0.1	0	0	0	0	0	0.2	0	1.4	0	0	14.8	0	0	0	5	0	0	0	0	0	0	0	0	1.6	4.8	3.7	0.5	1.6	1.9	0	0.1	1.6	1.1	0	0	0.2	0.7	0	0	0	0	0	0.1	0	0	0
1998-06-28	0.7	0.6	0.3	0.1	0.1	6.9	0	0	0.1	0	0	0	0	0	0	0	0	0	0	0	0	0	0	0	0	0	0.9	3.6	0	0.3	0.3	1.1	0	0.2	0	1.3	0.8	0.4	0	0	0	0	0	0	0	0.2	0	0	0
1998-06-29	0	0	0	0	0	0	0	0	0	0	0	0	0	0	0	0	0	0	0	0	0	0	0	0	0	0	5.8	16.5	0	0	0	9	0	0	0	3.6	2.2	1.8	0	0	0	0	0	0	0	0.2	0	0	0
1998-06-30	0	0.2	0	0	0	0	0	0	0	0.1	1	0	0	1.4	0	0	0	0	0	0	0	0	0	0	0	0	2.3	4.8	0.4	0	0	5.3	1.5	0.2	1.9	2.9	2.3	0.8	2	4.2	0	0	0	0	0	0	0	0	0
1998-07-01	0	0	0	0	0	0	0	0	0	0	9.9	0	0	0.4	0	0	0	0	0	0	0	0	0	0	0	0	0.7	3.4	0.2	0	1.2	9.9	0.1	0	0.6	2.1	3.3	2.1	0	0	0	0	0	0	0	0	0	0	0
1998-07-02	0	0	0	0	0	0	0	0	0	0	11.1	0.4	1.6	12.5	0	1	0.4	1.5	0	0	0	6.2	7.4	7.4	1.6	5.7	9.1	3.2	1.5	0.4	0.9	20.3	2.3	0	1	2.4	5.5	0.7	1.8	0	0	0	0	0	0	0	0	0	6.2
1998-07-03	0.1	0.1	0	0	0	24.3	0	0	0	0	0	0.6	0	2.9	0	0.1	0.6	1.3	0	0	0	1.9	0	0	0	0	0.4	2.5	0	0	0	0	0	0	0.2	0	0	0	1.1	0	0	0	0	0	0	0	0	0	1.9
1998-07-04	0.1	0.1	0	0	0.1	1.8	0	0	0	0	7.6	0	0	2.6	0	0	0	0.3	0	0	0	0	0	0	0	0	0.3	2.6	2.3	0.2	0.5	0.9	0	0	0.5	1.6	0.2	1	0	1.7	0	0.1	0	0	0	0	0	0	0
1998-07-05	0	0.1	0	0.1	0	1.7	0	0	0	0	1.9	0	2	33.1	0	0.6	0	11.5	0	0	0	0	0	0	2	1	3.1	2.1	1	0	0	0	0.1	0	1.3	1.9	0.4	0.1	1.1	0.3	0	0	0	0	0	0	0	0	0
1998-07-06	0	0.4	0	0.1	0	0	0	0	0	0	4.7	0	0	18.1	0	0.3	0	11.1	0	0	0	0	0	0	0	0	3.4	5.8	0	0	0	0	0	0	0	0	0	0	0	0	0	0	0	0	0	0	0	0	0
1998-07-07	0	0.1	0	0	0	0	0	0	0	0	1.9	0	0	3.3	0	0	0	0.6	0	0	0	0.8	4	4	0	0.9	0.9	9	2.1	0	0	0	0	0	0.4	1.4	0	0	0	0	0	0	0	0	0	0	0	0	0.8
1998-07-08	0	0.5	0	0	0	8	0	0.4	0	0	0.4	4.3	0.7	4.8	0.5	1.3	4.3	3.2	0	0.2	0	9.8	13.6	13.6	0.7	3.4	5.1	2	2.8	0	0	0.5	0.5	0.1	0.2	0.3	0	0.2	0	0	0	0	0	0	0	0	0.5	0.2	9.8
1998-07-09	0.1	0	0.1	0	0	7.2	0	1.7	0	0	1.4	5	1.1	8.8	0	0.5	5	3.8	0	0.2	0	1.7	0	0	1.1	1.5	6.1	2.9	0	0	0.1	2.7	0	0	0	0.4	0.2	0	0.2	0.3	0	0.1	0	0	0	0	0	0.2	1.7
1998-07-10	0	0	0	0	0.8	6.7	0	0.2	0.2	0	0	0	0	0.8	0.1	0	0	0	0.1	0.6	0	0	0	0	0	0	1.7	8.5	0	0	0	2.2	0.4	0.1	0	0	0	0	0	0	0	0.1	0	0	0	0.2	0.1	0.6	0
1998-07-11	0	0	0	0	0	1.8	0	0	0.1	0	0	0	0	1.8	0	0	0	0	0	0	3.3	0	0	0	0	0	3.3	5.9	0	0	0	2	1.3	0	0.1	0	0	0	0	0	0	0	0	0	0.1	0	0	0	0
1998-07-12	0	0	0.1	0	0	0.1	0	0	0	0	0	0	0	0.6	0	0	0	0	0	0	2.9	0	0	0	0	0	10.6	9.6	0	0	0	6.3	0.9	0	0.3	0	0	0	0.7	0	0	0	0	0	0	0	0	0	0
1998-07-13	0.1	0	0	0	0.3	9.8	0	0	0	0	0	0	0	0.3	0	0	0	0	0	0	2.5	0	0	0	0	0	15.4	1.5	0	0	0	0.7	0.4	0	0.2	0.2	0.2	0.1	0.2	0	0	0	0	0	0	0	0	0	0
1998-07-14	0.1	0	0	0	0	5.4	0	0	0	0	0	0	0	0.2	0	0	0	0	0	0	2.3	0	0	0	0	0	3.2	12.3	0	0	0	7.2	0	0.1	0.5	1.8	0.9	0.7	0	0	0	0	0	0	0	0	0	0	0
1998-07-15	0	0	0	0	0	0.2	0	0	0	0	0	0	0	0.7	0	0	0	0	0	0	9.7	0	0.5	0.5	0	0	27.4	1.7	2.6	0.2	0.6	0.6	0	0	0	0	0	0	0	0	0	0	0	0	0	0.1	0	0	0
1998-07-16	0.1	0	0.1	0	0	6.9	0	0	0	1.5	1.8	0	0	8.3	0	0	0	0	0	0	0	0	0	0	0	0	8.1	15.6	1.8	0.4	1	4.9	0	0	4.6	0.7	0.1	0	0.3	0.9	0	0.1	0	0	0	0	0	0	0
1998-07-17	0.2	0.1	0.1	0	0	2	0	0	0	0	0	0	0	1.2	0	0	0	0	0	0	0	0	0	0	0	0	1.1	1.3	1.4	0.2	0.2	0.3	0	0	0	0	0	0	0	0	0.1	0.1	0	0	0	0.1	0	0	0
1998-07-18	0	0.3	0	0	0	0.9	0	0	0	0	3.3	0	0	0.3	0	0	0	0	0	0	0	0	0	0	0	0	10.1	6.8	2.7	0	0.3	4.7	0	0	0	0	0.1	0	0.7	0	0	0	0	0	0.1	0.1	0	0	0
1998-07-19	0	0.1	0	0	0	0	0	0	0	0	3.5	0	0.1	3.4	0	0	0	0.1	0	0	0	0	0	0	0.1	0.4	2.1	5.2	0.5	0	0	1.4	0	0	0	0	0	0	0.3	0	0	0	0	0	0	0	0	0	0
1998-07-20	0	0	0	0	0	4.8	0	0	0	0	3.4	0	2.3	8.5	0	0.4	0	2.4	0	0	4.8	0	0.7	0.7	2.3	2.1	0.4	3.3	5.7	0	0	9.2	10.9	0.1	0.6	1.6	0.2	0	0	0.6	0	0	0	0	0.4	0	0	0	0
1998-07-21	0	0.1	0.1	0	0	0	0	0	0	0	3.1	0	1	15.1	0	0.3	0	9.8	0	0	0	0	0.4	0.4	1	0	8.1	18	4.3	0.2	0.3	5.1	0	0.2	0.1	3.3	0.2	0.1	0.5	1.4	0	0	0	0	0	0	0	0	0
1998-07-22	0	0.1	0.2	0	0	0	0	0	0	0	0	0	0	0	0	0	0	4.4	0	0	0	0	0	0	0	0	2.3	1.4	0	0	0	0.3	0	0.1	0.1	0	0	0	0.6	0.6	0.1	0	0	0	0	0	0	0	0
1998-07-23	0.5	0.6	0.1	0	0.1	0.1	0	0	0	0	0	0	0	0	0	0	0	0	0	0	0	0	0	0	0	0	1.4	3.5	0	0	0	1.7	0	0	0	0	0	0	0	0	0	0	0	0	0	0.3	0	0	0
1998-07-24	0	0	0.1	0	0	0.2	0	0	0	0	0	0	0	0	0	0	0	0	0	0	0	0	0	0	0	0	6.8	8.5	0	0.1	0.1	5.4	0	0	0	0	0.2	0	0.5	0.3	0	0	0	0	0.2	0	0	0	0
1998-07-25	0	0.7	0	0	0.2	1.9	0	0	0.2	0	0.7	0	0.3	1.2	0	0	0	0	0	0	0	0.1	0.2	0.2	0.3	0.3	9	7.5	0	0	0	3.4	0	0.1	0.3	0.2	0.1	0	0.4	0.5	0	0	0	0	0.1	0	0	0	0.1
1998-07-26	0.1	0.4	0	0	0	0.2	0	0	0	0	2.8	0	0	5.8	0	0	0	0	0	0	1.3	0	0	0	0	0	6.6	6	3.3	0	0.1	3.3	0.1	0.1	0.3	0.2	0.1	0	0	0	0	0	0	0	0	0	0	0	0
1998-07-27	0.1	0.1	0	0	0	0.8	0	0	0	0	3.6	0	0	9.8	0	0	0	0.1	0	0	0	0	0	0	0	0	3	12.6	0.7	0	0	0.2	0	0.1	0.2	0	0	0.1	0	0	0	0	0	0	0	0	0	0	0
1998-07-28	0	0	0	0	0	1.7	0	0.3	0	0	0	0	0.4	0.6	0	0.5	0	1.7	0	0	0	0	0	0	0.4	0.7	10.2	10.1	0.4	0.1	0.4	1.4	0	0	0	0	0	0	0.5	0.6	0.1	0	0	0	0	0.5	0	0	0
1998-07-29	0	0	0	0	0	0.4	0	0	0	0	0	0	0	0	0	2.6	0	0	0	0	8	0	0	0	0	4.3	0.9	0	0	0	0.3	0.6	0	0	0	0	0	0	0	0	0	0	0	0	0	0	0	0	0
1998-07-30	0	0	0	0	0.4	0.4	0	0	0	0	0	0	0	0	0	0	0	0	0	0	0	0	0	0	0	0	6.8	1.1	0	0	0	7.9	0	0	0	0	0	0	0	0	0	0	0	0	0	0	0	0	0
1998-07-31	0	0	0	0	0	5.7	0	0	0	0	0	0	0	0	0	0	0	0	0	0	0	0	0	0	0	0	0	0.4	0	0	0	0	0	0	0	0	0	0	0	0	0	0	0	0	0	0	0	0	0
1998-08-01	0	0	0	0	0.7	1.6	0	0	0	0	0	0	0	0	0	0	0	0	0	0	0	0	0	0	0	0	0	0	0	0	0	0	0	0	0	0	0	0	0	0	0	0	0	0	0	0	0	0	0
1998-08-02	0	0	0	0	0	4.4	0	0	0	0	0	0	0	0	0	0	0	0	0	0	0	0	0	0	0	0	0	0	0	0	0	25.3	0	0	0	0	0	0	0	0	0	0	0	0	0	0	0	0	0
1998-08-03	0	0	0	0	0	0.1	0	0	0	0	0	0	0	0	0	0	0	0	0	0	0	0	0	0	0	0	0	3.5	0	0	0	1.5	0	0	0	0	0	0	0	0	0	0	0	0	0	0	0	0	0
1998-08-04	0	0	0	0	0	0	0	0	0	0	0	0	0	0	0	0	0	0	0	0	0	0	0	0	0	0	0	0	0	0	0	1.7	0	0	0	0	0	0	0	0	0	0	0.3	0	0	0	0	0	0
1998-08-05	0	0	0	0	0	0.1	0	0	0	0	0	0	0	2.8	0	0	0	0	0	0	0	0	0	0	0	0	6.7	0	0	0	0	6.1	0	0	0	0	0	0	2.5	0	0	0	0.2	0	0	0	0	0	0
1998-08-06	0	0	0	0	0	0.6	0	0	0	0	0	0	0	3.6	0	0	0	0	0	0	0	0	0	0	0	0	0	1	0	0	0	0	0	0	0	0	0	0	4.8	0	0	0	0	0	0	0	0	0	0
1998-08-07	0	0	0	0	0	0	0	0	0	0	0	0	0	0	0	0	0	0	0	0	0	0	0	0	0	0	0	0	0	0	0	0	0	0	0	0	0	0	0	0	0	0	0	0	0	0	0	0	0
1998-08-08	0	0	0	0	0	0.1	0	0	0	0	0.9	0	0	4.4	0	0	0	0.3	0	0	0	0	0	0	0	0	0	0	0	0	0.2	0.8	0	0	0	0	0	0	0	0	0	0	0	0	0	0	0	0	0
1998-08-09	0	0	0	0	0	0.2	0	0	0	0	1.3	0	0.3	2.1	0	0.2	0	0.8	0	0	0	0	0	0	0.3	0	5.8	5.3	0	0	0	3.6	0	0	0	0	0	0	0	0	0	0	0	0	0	0	0	0	0
1998-08-10	0	0	0	0	0	2.3	0	0	0	0	0	0	0	0.1	0	0	0	0	0	0	0	0	0	0	0	0	0	0	0	0	0	1.7	0	0	0	0	0	0	8.3	0	0	0.1	0	0	0	0	0	0	0
1998-08-11	0	0	0	0	0	0	0	0	0	0	0	0	0.2	8.1	0	0	0	0	0	0	0	0	0	0	0.2	0.7	1.1	1.6	0	0	0	2.3	0	0	0	0	0	0	2.6	0	0	0.1	0	0	0	0	0	0	0
1998-08-12	0	0	0	0	0	0	0	0	0	0	0	0	0	1.3	0	0	0	0	0	0	0	0	0	0	0	0	4.7	0.2	0	0	0	1.6	0	0	0	0	0	0	0	0	0	0	0	0	0	0	0	0	0
1998-08-13	0	0	0	0	0	15.3	0	0	0	0	0	0	0	1.6	0	0	0	0	0	0	0	0	0	0	0	0	0	12.5	0	0	0	0	0	0	0	0	0	0	5.7	0	0	0	0	2.7	0	0	0	0	0
1998-08-14	0	0	0	0	0	8.3	0	0	0	0	0.6	0	0.1	7.8	0	0	0	0.7	0	0	3.2	0	0.8	0.8	0.1	2.2	2	0	0	0	0	4.8	1.5	0	0	13	2.4	0	4.1	0	0	0	0	0	0	0	0	0	0
1998-08-15	0	0	0	0	0	1.2	0	0	0	0	0	0	0	0	0	0	0	0	0	0	0	0	0	0	0	0	0	0	0	0	0	2.4	0	0	0	0	1.4	0	6	0	0	0.1	0	0	0	0	0	0	0
1998-08-16	0	0	0	0	0	0	0	0	0	0	0	0	0	0	0	0	0	0	0	0	0	0	0	0	0	0	0	0	0	0	0	1.9	0	0	0	0	0	0	0	0	0	0	0	0	0	0	0	0	0
1998-08-17	0	0	0	0	0	0	0	0	0	0	0	0	0	0	0	0	0	0	0	0	0	0	0	0	0	0	1	2.4	0	0	0.1	0.9	0	0	0	0	0	0	3.4	0	0	0	0	0	0	0	0	0	0
1998-08-18	0	0	0	0	0	0	0	0	0	0	0	0	0	2.5	0	0	0	0	0	0	0	0	0	0	0	0	1.2	15.8	0	0	0	7.4	0	0	0	0	0	0	2	0	0	0	0	0	0	0	0	0	0
1998-08-19	0	0	0	0	0	0	0	0	0	0	0.1	0	0	0	0	0	0	0	0	0	0	0	0	0	0	0	0.1	0.4	0.1	0.2	0.2	2.9	0	0	0.2	0	0.6	0.5	4	0	0	0	0	0	0	0	0	0	0
1998-08-20	0	0	0	0	0	0	0	0	0	0	0	0	0	0	0	0	0	0	0	0	0	0	0	0	0	0	0	1.5	0	0.1	0.2	0	0	0	0	0	0	0	0	0	0.1	0	0	0	0	0	0	0	0
1998-08-21	0	0	0	0	0	0	0	0	0	0	0	0	0	0	0	0	0	0	0	0	0	0	0	0	0	0	0	0.9	0	0	0	0	0	0	0	0	0	0	0.2	0	0	0	0	0	0	0	0	0	0
1998-08-22	0	0	0	0	0	7	0	0	0	0	0.5	0	0	0	0	0	0	0	0	0	0	0	0.8	0.8	0	0	0.3	3.2	0	0	0	0	0	0.1	0	0	3.5	0	1.6	0.3	0	0.1	0	0	0	0	0	0	0
1998-08-23	0	0	0	0	0	0.5	0	0	0	0	0	0	0	0	0	0	0	0	0	0	0	0	0	0	0	0	0.3	0	0	0	0	4.1	3.4	0.1	0	0	0.9	0	0	0	0	0	0	0	0	0	0	0	0
1998-08-24	0	0	0	0	0.2	3.7	0	0	4.6	0	0.3	0	0	0.7	0	0	0	0	0	0	0.1	0	0	0	0	0	0	0	0.1	0	0	0.3	0.9	0	0	0	0.7	0	1.8	0	0	0	0	0	0	0	0	0	0
1998-08-25	0	0	0	0	0	0.2	0	0	1.2	0	0	0	0	0.3	0	0	0	0	0.5	0	0	0	0	0	0	0.1	0.6	0.8	0	0	0	0.8	0	0	0	0	0.1	0	0	0	0	0	0	0	0	0	0	0	0
1998-08-26	0	0	0	0	0	0.2	0	0	0	0	0	0	0	0	0.3	0	0	0	0	0	0	0	0	0	0	0	0	0.5	0	0	0	0	0	0	0	0	0	0	1.1	0	0	0.1	0	0	0	0	0.3	0	0
1998-08-27	0	0	0	0	0	0.5	0	0	0	0	0	0	0	3.7	0	0	0	0	0	0	0	0	0	0	0	0	1.1	6.7	0	0	0	0.4	0	0	0.1	0	0	0	0	0	0	0	0	0	0	0	0	0	0
1998-08-28	0	0.3	0	0.2	0	0	0	0	0	0	0	0	0	4.9	0	0	0	0	0	0	0	0	0	0	0	0.1	0.5	0	0	0	0.1	0.7	0	0	0	0	0	0	0	0	0	0	0	0	0	0.1	0	0	0
1998-08-29	0	0.6	0	0	0	0	0	0	0	0	0	0	0	0.5	0	0	0	0	0	0	0	0	0	0	0	0	0	0	0.2	0.1	0	0	0	0	0	0.3	0	0	0	0	0	0	0	0	0	0	0	0	0
1998-08-30	0	0	0	0	0	0	0	0	0	0	0	0	0	0.3	0	0	0	0	0	0	0.1	0	0.3	0.3	0	0.3	1.1	4.3	0	0	0	0	0	0	0	0	0	0	0	0	0	0	0	0	0	0	0	0	0
1998-08-31	0	0	0	0	0	0.2	0	0	0	0	0	0	0	3.2	0	0	0	0	0	0	0	0	0	0	0	0.4	0.2	0.6	0	0	0	0	0	0	0	0	0	0	1.4	0	0	0	0	0	0	0	0	0	0
1998-09-01	0	0	0	0	0	0.1	0	0	0	0	0	0	0	0	0	0	0	0	0	0	0.5	0	0	0	0	0	0.4	2.5	0	0	0	0.2	0	0	0	0	0	0	0	0	0	0	0	0	0	0.1	0	0	0
1998-09-02	0	0	0	0.1	0	0.4	0	0	0	0	0	0.4	0	0	0	0	0.4	0	0	0	0.9	0.6	0.6	0.6	0	0	0.1	0.6	0	0	0	0.9	0	0	0.2	0	0	0	0	0	0	0	0	0	0	0.1	0	0	0.6
1998-09-03	0	0	0	0	0	0.6	0	0	0	0	2.4	0.5	0.1	4.2	0	0	0.5	0	0	0	0	1	3.9	3.9	0.1	2.5	6.2	6.7	0	0	0	1.9	0	0	0.1	1.2	0.5	0	0	0	0	0	0	0	0	0	0	0	1
1998-09-04	0	0	0	0	0	0	0	0	0	0	0	0	0	3.4	0	0	0	0	0	0	0	0	0	0	0	0	2.4	0.4	0	0	0	1	0	0.1	0.7	0.6	0.2	0.2	1.7	0.1	0	0	0	0	0	0	0	0	0
1998-09-05	0	0	0	0	0	0	0	0	0	0	0	0	0	4.6	0	0	0	0	0	0	0	0	0	0	0	0	0	0	0	0	0	0	0	0	0	0	0	0	0	0	0	0	0	0	0	0	0	0	0
1998-09-06	0	0	0	0	0	0	0	0	0	0	0.1	0	0	1.6	0	0	0	0.1	0	0	0	0	0	0	0	0	0	0	0	0	0	0	0	0	0	0	0	0	0	0	0	0	0	0	0	0	0	0	0
1998-09-07	0	0	0	0	0	0	0	0	0	0	0	0	0	4.4	0	0.2	0	0	0	0	0	0	0	0	0	0	0	0	0	0	0	0	0	0	0	0	0	0	0	0	0	0	0	0	0	0	0	0	0
1998-09-08	0	0	0	0	0	0.4	0	0	0	0	0	0	0.1	2.8	0	0	0	0	0	0	0	0	1	1	0.1	0.6	0.2	0.5	0	0.1	0.3	1	0	0	0	0	0	0	0.5	0.1	0	0	0	3.2	0	0	0	0	0
1998-09-09	0	0	0	0	0	0	0	0	0	0	0.3	0	0	0	0	0	0	0	0	0	0	0	0	0	0	0	0	1.7	0	0.2	0.3	0.5	0	0	0	0	0	0	2.2	0	0.1	0	0	0	0	0	0	0	0
1998-09-10	0	0	0	0	0	0	0	0	0	0	0	0	0	0.2	0	0	0	0	0	0	0	0	0	0	0	0	0	0	0	0.1	0	0	0	0	0.1	0	0	0	0.5	0	0	0	0	0	0	0	0	0	0
1998-09-11	0	0	0	0	0	0.2	0	0	0	0	0	0	0	0	0	0	0	0	0	0	0	0	0	0	0	0	0	0	0	0	0	0.6	0	0	0	0	0	0	0.4	0.2	0	0	0	0	0	0	0	0	0
1998-09-12	0	0	0	0	0	0	0	0	0	0	0	0	0	0	0	0	0	0	0	0	0.8	0	0	0	0	0	2.2	2.2	0	0	0.1	1.7	0	0	0	0.1	0	0	0	0	0	0	0	0	0	0	0	0	0
1998-09-13	0	0	0	0	0	0.7	0	0	0	0	0.8	0	0.5	0.4	0	0	0	0	0	0	0.4	0.7	1.3	1.3	0.5	0.1	4	6.3	0.3	0	0.2	2.8	0	0	0	0	0	0	0	0	0	0	0	0	0	0	0	0	0.7
1998-09-14	0	0	0	0	0	0.2	0	0	0	0	0	0	0	0	0	0	0	0	0	0	0	0	0	0	0	0	0.8	0.3	0.3	0	0	0.1	0	0	0	0	0	0	0	0	0	0	0	0	0	0	0	0	0
1998-09-15	0	0	0	0	0	0.3	0	0	0	0	0	0	0	1.9	0	0	0	0	0	0	0.4	0	0	0	0	0	1.8	0.7	0	0	0	0.7	0	0	0.2	0	0	0	0	0	0.2	0	0	0	0	0	0	0	0
1998-09-16	0.1	0	0.1	0	0.1	0.6	0	0.1	0	0	0	0.1	0.8	7.9	0	0	0.1	0	0	0	0	0	0.1	0.1	0.8	7	1.6	8.3	0	0	0	0.7	0	0	0	0	0	0	0	0	0.5	0	0	0	0	0	0	0	0
1998-09-17	0	0	0	0	0	3.2	0	0	0	0	0	0	0	0	0	0	0	0	0	0	0.1	0	0	0	0	0	0	1.7	0	0	0	1	0	0	0	0	1.6	0	0	0	0	0	0	0	0	0	0	0	0
1998-09-18	0	0	0	0	0	0.1	0	0	0	0	0	0	0	0.2	0	0	0	0	0	0	1.2	0.2	0.6	0.6	0	0.8	0	0	0	0	0	0	0	0	0	0	0	0	0	0	0	0.1	0	8.4	0	0	0	0	0.2
1998-09-19	0	0	0	0	0	0.9	0	0	0	0	0	0	0	0.8	0	0	0	0	0	0	1.8	0	0	0	0	0.2	2.7	0	0	0	0	0	0	0	0	0	0	0	0.4	0	0	0	0.7	4.4	0	0	0	0	0
1998-09-20	0	0	0	0	0	1.8	0	0	0	0	0	0	0.1	0	0	0.1	0	0.1	0	0	0	0	0	0	0.1	0.2	3.5	0	0	0	0	4.6	0	0	0	0	0	0	0	0	0	0	0	2	0	0	0	0	0
1998-09-21	0	0	0	0	0	0	0	0	0	0	0.4	0	0.1	1.6	0	0	0	0	0	0	0	0	0	0	0.1	0.3	1.2	1.8	0	0	0	0.6	0	0	0	0	0	0	0	0	0	0	0	0	0	0	0	0	0
1998-09-22	0	0	0	0	0	0	0	0.1	0	0	0	0.1	0.1	0	0	0.2	0.1	0	0	0	0	0.1	0.6	0.6	0.1	0.1	0.1	0	0	0	0	0	0	0	0	0	0	0	0	0	0	0	0	0	0	0	0	0	0.1
1998-09-23	0	0	0	0	0	3.5	0	0	0	0	0.1	0	0	0	0	0	0	0	0	0	0	0	0.1	0.1	0	0	0	0	0	0	0	0	0	0	0	0.1	0	0	2.1	0	0	0	0	0	0	0	0	0	0
1998-09-24	0	0	0	0	0	0	0	0	0	0	0	0	0	0.8	0	0	0	0	0	0	0	0	0	0	0	0	0.8	0	0	0	0	3.6	0	0	0	0	0.1	0	1.6	0	0	0	19.6	0	0	0	0	0	0
1998-09-25	0	0	0	0	0	0	0	0	0	0	0	0	0	2.8	0	0	0	0	0	0	0	0	0	0	0	0	0	0.3	0.1	0	0.6	3.6	0	0	0	0	0	0	0	0	0	0	1.3	4.9	1.6	0.3	0	0	0
1998-09-26	0	0	0	0	0	0	0	0	0	0	0	0	0.1	0	0	0	0	0	0	0	0	0	0	0	0.1	0.6	0	0	0	0	0	1.2	0	0	0	0	0	0	0	0	0	0	0.1	4.8	0.1	0.2	0	0	0
1998-09-27	0	0	0	0	0	0	0	0	0	0	0.3	0	0	0	0	0	0	0	0	0	0	0	0	0	0	0	0.3	0.3	0	0	0	0	0	0	0	0	0.4	0	1	0	0	0	0	8.1	0	0	0	0	0
1998-09-28	0	0	0	0	0	0	0	0	0	0	0	0	0	0	0	0	0	0	0	0	0	0	0	0	0	0	0.5	0.8	0	0	0	0	0.5	0	0.8	0.5	0.9	0	2	0	0	0	2.7	2.4	0	0	0	0	0
1998-09-29	0	0	0	0	0	0.3	0	0	0	0	0	0	0	0.4	0	0	0	0	0	0	4.2	0	0.1	0.1	0	0.2	0.8	1.2	0	0	0	0	0	0	0	0	0	0	0	0	0	0	3.5	2.7	0	0	0	0	0
1998-09-30	0	0.1	0	0	0	0.3	0	0.1	0	0	0	0.1	0	0.7	0	0	0.1	0	0	0	0	0.4	0.7	0.7	0	0.3	1.2	0	0	0	0	0	0	0	0	0.1	0	0	0	0	0	4.2	0	2.4	0	0	0	0	0.4
1998-10-01	0	0	0	0	0.1	0.2	0	0	0	0	0	0	0	4.5	0	0	0	0.1	0	0	0	0	0.1	0.1	0	0	0	0	0	0	0.1	0	0	0	0.1	16.9	0.7	0	1.8	0	0	0.5	0	15.2	0	0	0	0	0
1998-10-02	0	0	0	0	0.2	0	0	0	0	0	0	0	0	7.5	0	0	0	0	0	0	0	0	0	0	0	0	0	4.6	0	0.1	0.1	0	0	0.2	0.8	0	0.1	0	12.1	0	0.3	0	0.5	2	0	0	0	0	0
1998-10-03	0	0	0	0	0	0	0	0	0	0	0	0	0	0.3	0	0	0	0	0	0	0	0	0	0	0	0	2.6	0	0.1	0.1	0	2.1	0	0	1.4	0	0	0	1.1	0	0	0.2	0	7.6	0	0	0	0	0
1998-10-04	0	0	0	0	0	0	0	0	0	0	0	0	0	1.5	0	0	0	0	0	0	0	0	0	0	0	0	6.1	1.3	0	0	0	0	0	0.1	1.5	0	0	0	5.4	0	0	0	0	3.5	0	0	0	0	0
1998-10-05	0	0	0	0	0	0.7	0	0	0	0	0	0	0	2.4	0	0	0	0	0	0	0	0	0	0	0	0	3.8	0.9	0	0	0	0	0	0	0.5	0	0	0	25.1	0	0	0	0	0	0	0	0	0	0
1998-10-06	0	0	0	0	0	0	0	0	0	0	0	0	0	0	0	0	0	0	0	0	0	0	0.1	0.1	0	0	0.5	7.8	0	0	0	6.4	0	0.1	0	0	0	0	0.8	0	0	0	0	0	0	0	0	0	0
1998-10-07	0	0	0.1	0	0	0	0	0	0	0	0	0	0	4.4	0	0	0	0	0	0	0	0	0.1	0.1	0	0	0.9	0.2	0.3	0	0.2	1.6	0	0.1	0	0	0	0	0	3.5	0	0	0	0.1	0	0	0	0	0
1998-10-08	0	0	0	0	0	0.1	0	0	0	0	0	0	0	0.1	0	0	0	0	0	0	0	0	0	0	0	0	0	1	0.1	0.2	0.1	0	0	0	0	0	0	0.2	0.6	0	0	0	0	0.2	0	0	0	0	0
1998-10-09	0	0	0	0	0	0	0	0	0	0	0	0	0	3.4	0	0	0	0	0	0	0	0	0	0	0	0	1.6	8	0	0	0	2.9	0	0	0	0	0	0	0	0	0	0	0	0.3	0	0	0	0	0
1998-10-10	0	0	0	0	0	1.2	0	0	0	0	0	0	0	2.3	0	0	0	0	0	0	0	0	0	0	0	0	0	1.4	0	0	0	0	0	0	0	0	0	0	0	0	0	0	0	0	0	0	0	0	0
1998-10-11	0	0	0	0	0	0.2	0	0	0	0	0	0	0	0.1	0	0	0	0	0	0	0.1	0	0	0	0	0	0	0.2	0	0	0	0	0	0	0	0	0.5	0	0	0	0	0	0	0.1	0	0	0	0	0
1998-10-12	0	0	0	0	0	0	0	0	0	0	0	0	0	2.8	0	0	0	0	0	0	0	0	0.1	0.1	0	0.1	0	2.8	0.1	0	0	0	0	0	0	0	0	0	0	0	0	1.6	2	11.5	0	0	0	0	0
1998-10-13	0	0	0	0	0	0.1	0	0	0	0	1.4	0	0.4	7	0	0.1	0	0.1	0	0	0	0	0	0	0.4	0.6	0.1	0.3	0.6	0	0	0	0	0	0	0	0	0	3.2	0	0	5.7	0	0	0	0.4	0	0	0
1998-10-14	0	0	0	0	0.1	0	0	0	0	0	0.1	0	0	4.6	0	0	0	0	0	0	0	0	0.1	0.1	0	0	4.4	0	0	0	0	1	0	0	0	5.1	0	0	2.8	0	0	4.7	0.2	0.4	0	0.2	0	0	0
1998-10-15	0	0	0	0	0	0.2	0	0	0	0	0	0	0	0	0	0	0	0	0	0	0	0	0	0	0	0	0.9	0.7	0	0	0	0.1	0	0	0	0	0	0	1.2	0	0	0	0.1	0.1	0	0.7	0	0	0
1998-10-16	0	0	0	0	0.3	0.1	0	0	0	0	0	0	0	0	0	0	0	0	0	0	0.3	0	0	0	0	0	0	0	0	0	0	0	0	0	0	0	0	0	10.9	0	3.7	0	0	0	0.7	0	0	0	0
1998-10-17	0	0	0	0	0	0	0.2	0	0	0	0	0.2	0	0.7	0	0	0.2	0	0	0	6.5	1.8	0.6	0.6	0	0	0	0.4	0	0	0	0.1	0	0	0	0	0	0	0.6	0	0	0	0	0.1	0	0	0	0	1.8
1998-10-18	0	0	0	0	0.1	1.1	0.5	0	0	1	0.9	0.2	0.7	0.4	0	2.4	0.2	0	0.8	0	2.7	0.7	2.1	2.1	0.7	0.4	0.9	0.3	0.2	0.3	0.3	1.2	0.1	0	0	0	0	0	0	0	0.1	0	0	0	0	0	0	0	0.7
1998-10-19	0	0.2	0.1	0.1	3.9	3.6	0.6	0.7	5.4	0	1.1	2.1	0.3	0	0.1	2.8	2.1	3.8	0.9	0.2	0.7	3.1	2.4	2.4	0.3	0.2	0.1	0	0	0.2	0	0.3	0	0	0.8	0	0	0	0.3	0	1.2	0	0.1	2	0.1	0	0.1	0.2	3.1
1998-10-20	0.1	0	0	0	0.5	1.2	0	2.9	2.6	9.4	0.6	4.7	4.8	4	0.4	0.4	4.7	0.7	2.3	0.5	5.7	3.8	8.8	8.8	4.8	6.7	0.1	0	0.1	0.9	0.1	0	0	0	0	0.4	0.2	0	0.2	0	0.9	0	0	0	0.3	0	0.4	0.5	3.8
1998-10-21	0.2	0.2	0.2	0	20.5	3.2	0	3.3	65.5	0	0.2	3.9	0.1	0.3	23.3	0	3.9	0	33.6	25.1	4.7	4.4	1	1	0.1	0.1	0.3	0	0.1	3.3	2	1.6	0.7	8.2	1.8	1.3	0.8	1.3	0	0.5	8.8	0.9	0	0	0.1	0	23.3	25.1	4.4
1998-10-22	0.3	0	0	0	0	1.2	0	0	0.2	2.9	3.9	0	0.5	1	0	0.4	0	1.8	0	0	0	0	0	0	0.5	0.5	0.1	1.3	2	0.1	0.2	0.9	1.2	0.5	0.2	0.3	1.4	3.6	0	0	0.1	0.1	0.8	2	0.1	0	0	0	0
1998-10-23	0	0.1	0	0	0.2	0	0	0	0	0	0.3	0	0	0.1	0	0	0	0	0	0	0	0	0	0	0	0	0.2	0.4	0	0.6	0.6	0.8	0.6	0.5	1.9	1.5	1.8	2.3	0.2	0	0.8	1.2	0.6	2.8	0	0	0	0	0
1998-10-24	0.1	0.1	0.1	0	0	0	0	0	0	0	0	0	0	0	0	0	0	0	0	0	0	0	0	0	0	0	0.3	0.1	0	0	0	0.1	0	0	0	0	5.4	7.9	0.7	0.7	0	0.4	0.4	1	0.9	0	0	0	0
1998-10-25	0.1	0	0.3	0	0	0	0.4	0	0	0	3.6	0	0.4	0.9	0	0.4	0	2.6	0	0	0.3	0	0.1	0.1	0.4	0.7	5.3	4.7	9.9	0.4	0.4	0.7	4.7	1.9	0.1	0	0.6	1.5	0	0	0.1	0.7	1.9	1.4	0	0	0	0	0
1998-10-26	0	0	0	0	0.1	2.1	0	0	1	0	0.1	0	0	0	0.1	0	0	0	0.3	0	0	0	0	0	0	0	0.2	0	0	0	0	0	0.1	0	1.1	0.3	0.5	0.1	0.4	0.3	0.1	0.1	0	2.3	0	0	0.1	0	0
1998-10-27	0	0	0	0	0	0.3	0.4	0	0	0	5	0	0.1	0.3	0	0.2	0	0.1	0	0	0	0	0.5	0.5	0.1	0.1	0.5	0.2	2.5	0.2	0	1.2	0	0	1.1	0	0	0	0	0	0.1	0.2	0	1.2	0	0	0	0	0
1998-10-28	0	0	0	0	0	0.1	0.1	0.2	0	0	0.2	0.2	0.1	0	0.1	0.1	0.2	0	0	0.1	0.3	0.1	0.2	0.2	0.1	0.2	0	0.2	1.1	0	0	0.7	0	0.9	0	0	0	1	0.5	0.2	0	1.3	3.2	0.7	0	0	0.1	0.1	0.1
1998-10-29	0	0	0	0	0	0	0	4.4	1.7	0	0.1	2.9	1.4	0	1.2	3.9	2.9	0.6	5	0	2.8	6.3	2.7	2.7	1.4	1.1	0.2	0	0.2	1.6	0.1	0	0	0	0	0	0	0.1	0.1	0	0	0	3.5	0.8	0	0.1	1.2	0	6.3
1998-10-30	0	0	0	0	0.1	0	0	0	0.2	0	0	0.2	0.3	0	0	0	0.2	0.2	0	0	0	0.4	0.4	0.4	0.3	0.3	0	0.1	0	0	0	0.3	0	0.1	0.1	1.9	0	0	0.1	0	0	0	0.2	0.7	0	0	0	0	0.4
1998-10-31	0	0	0	0	0	0	1.2	1.2	0	0	0	2.8	0.5	0	2.2	1.9	2.8	0.5	0	0.2	0.2	1.4	0.2	0.2	0.5	0.1	0	0	0	0	0	0	0	0	0	0.5	0	0	0.3	0	0	0	0.6	0	0	0	2.2	0.2	1.4
1998-11-01	0	0	0	0	0	0	0.1	0	0	0	0	0	0	0.2	0	0	0	0.1	0	0	0	0	0	0	0	0	0	0	0	0	0	0	0	0	0	0	0	0	0.2	0	0	0	7.5	4.1	0	0	0	0	0
1998-11-02	0	0	0	0	0	0	0	0	0	0	0	0	0	0	0.1	0	0	0	0.3	0.3	0	0	0	0	0	0	0	0	0	0	0	0	0	0	0	0	0	0	0	0	0	0	3.2	3.7	0	0	0.1	0.3	0
1998-11-03	0	0	0	0	0	0	0.2	0	0	0	0	0	0	0	0	0	0	0	0	0.1	0	0	0	0	0	0	0	0	0	0	0	0.2	0	0	0	0	0	0	0	0	0	0.1	43.8	3.1	0	0	0	0.1	0
1998-11-04	0	0	0	0	0	0.2	0	0	0	0	0	0	0	2.2	0	0	0	0	0	0	0	0	0	0	0	0	0	0.3	0	0	0	0	0	0	0.3	1.6	0.3	0	0.3	0	0	1.4	0.2	0.4	0.3	0.1	0	0	0
1998-11-05	0	0	0	0	0	0.1	0	0	0	0	0	0	0	0.2	0	0	0	0	0	0	0	0	0	0	0	0	0.1	1	0	0	0	0	0	0	0.2	0	0	0.6	1.4	0.1	0	0.9	1.8	4	0.2	0.3	0	0	0
1998-11-06	0	0	0	0	0	0	0	0	0	0	0	0	0.1	0	0	0.1	0	0	0	0	7	0.1	0.6	0.6	0.1	1.3	0.1	0.3	0.2	0	0	0.1	0	0	0.1	0	0	0	0.2	0.1	0	5.1	7.9	0	1.5	0	0	0	0.1
1998-11-07	0	0	0	0	0	0.4	0	0	0	0	0	0	0.1	0	1.2	0.2	0	1.5	0.1	2.2	1.4	0.7	0.9	0.9	0.1	0	0	0	0	0	0	0.1	0	0	0	0	0	0	1.3	0	0	2.7	0.2	3.5	0.6	2.3	1.2	2.2	0.7
1998-11-08	0	0	0	0.1	0	0.2	0	0	0	0	0	0.1	0	0	0	0	0.1	0	0	0.1	0	0.3	0	0	0	0	0.1	0	0.1	0	0	0.3	0	0	0	0	0	0	0.2	0	0	0	3.1	10.1	0	0.5	0	0.1	0.3
1998-11-09	0	0	0	0	0	0.2	0	0	0	0	0	0	0	0.9	0	0	0	0	0	0	0	0	0	0	0	0	0	0.1	0	0.2	0.1	0	0	0	0.1	0	0	0	0.4	0	0.7	11.6	16.4	0.1	0	0	0	0	0
1998-11-10	0	0	0	0	0	0	0	0	0	0	0	0	0	0.2	0.2	0	0	0	0.7	0.3	0.1	0	0	0	0	0	0	0	0	0	0	0	0	0	0	0	0	0	0.1	0	0.1	9	7.2	0.6	2.9	17	0.2	0.3	0
1998-11-11	0	0	0	0	0	0	0	0	0	0	0	0	0	0	0	0	0	0	0	0	0	0	0	0	0	0	0	0	0	0	0	0	0	0	0	0	0	0	0	0	0	0.4	1.2	0	7.5	3.5	0	0	0
1998-11-12	0	0	0	0	0	0.1	0	0	0	0	0	0	0	0	0	0	0	0	0	0	0	0	0	0	0	0	0	0	0	0	0	1.3	0	0	0	0	0.1	0	0	0.5	0	0	0.8	3.8	0	0	0	0	0
1998-11-13	0	0	0	0	0	0.1	0	0	0	0	0.1	0	0	0	0	0	0	0	0	0	0	0	0	0	0	0	0.2	0	0.1	0.3	0.2	0.7	0	0	0	0.1	0.1	0	0.6	0	0.1	0	0.3	5	0	0	0	0	0
1998-11-14	0	1.6	0	0	0	0.1	0	0	0	0	0	0	0	0.7	0	0	0	0	0	0	0	0	0	0	0	0.1	0.1	0.1	0.1	0.2	0.3	0	0	0	0	1.5	0.7	0	1.1	0	0	0	0.1	0	0	1.9	0	0	0
1998-11-15	0	0.7	0	0	24.4	0.2	0	0	42.2	0	0	0	0	0.4	0	0	0	0	4.2	0	0.2	0.1	0	0	0	0	0.2	0	0.1	0	0	0.2	0	0	0	0.3	0.3	0	0.9	0	0	2.3	5.4	65.8	0.7	0	0	0	0.1
1998-11-16	0	1.7	0	0	0	0.2	0.3	0	0.3	1.1	0	0	0	0.1	0	0	0	0	0.5	0	0	0.6	0.4	0.4	0	0	0.7	0	0	0	0	0.8	0.7	0	0.2	0	0.2	0	1.1	0	0	0.2	10.8	5	4.5	0	0	0	0.6
1998-11-17	0.3	6.5	0	1.3	0	0.1	3.7	0	0	8	0	0	0	0	0	0	0	0	0	0	0.1	0.1	0	0	0	0	0.1	0	0.2	0	0	0	0.4	0	0	0	0.5	0	1.2	0	0	0.9	0.1	0	3.8	0.2	0	0	0.1
1998-11-18	1.4	16.5	0.2	0.7	0	0	0.5	0	0	0.5	0	0.1	0.1	0	0	0	0.1	0	0	0.2	0	0	0	0	0.1	0	0	0	0.2	0.3	0.1	0	0	0.2	0	0	0	0	0.1	0	0.3	3.6	7.8	4.1	6.5	0	0	0.2	0
1998-11-19	0	4.4	0.1	0.8	4.2	0	0	2.4	2.1	5.6	0	1.9	0.2	0	7.8	0.3	1.9	0.1	4.3	7.6	12.2	2.6	0.8	0.8	0.2	0.2	0	0	0	0	0	0	0	0	0	0	0	0	0.2	0	0	1.8	0	0	65.6	0	7.8	7.6	2.6
1998-11-20	7.6	1.1	0.7	1.3	39.2	0	1	25.9	37.3	6.1	0.1	11	4.3	0.8	25.7	11	11	6	12.4	17.9	6.8	8.4	4.9	4.9	4.3	1.9	0	0	0	0	0	0	0	0	0	0	0	0	0	0	0	0.4	5	1	0	0	25.7	17.9	8.4
1998-11-21	4.7	0	10.6	7	20.7	3.1	9.3	30.8	9.5	0.2	0.4	7	15.4	8.9	20.5	19.7	7	10.6	5.8	7.6	27	4.1	5.4	5.4	15.4	5.5	0.1	0	0	0	0	0.4	0	0	0.7	0	0	0	1.7	0	0	2.7	0	3.9	0	0	20.5	7.6	4.1
1998-11-22	0	0	0.3	0	1.2	14.9	0.5	8.3	3.4	8.7	0.4	6.5	2.9	2.1	6.4	1.9	6.5	1.4	2.5	5.6	15.6	7.4	4.8	4.8	2.9	3	0	0.6	3.1	2.7	3.8	0.2	2.7	3.8	23.8	26.6	25.7	3.7	1.8	0.7	1.5	0	0	0.5	0	0.1	6.4	5.6	7.4
1998-11-23	0	0	0	0	2.1	16.6	1.6	3.5	10.9	11.5	0	24.1	0.1	2.6	31.2	0.6	24.1	0.1	41.6	39.4	51.3	38.4	4.3	4.3	0.1	0.2	0.1	1.1	0	22.1	11.6	1.7	10.6	9.4	1.7	8.1	0.5	3.5	11.6	41.5	43.7	2.9	0.5	1.2	0	0	31.2	39.4	38.4
1998-11-24	1.9	5.1	0.3	19.3	10.1	0.2	9	0.2	5.5	13.6	0	0.1	0.7	1.6	0	0.8	0.1	7.6	0.1	0.1	0.6	0.3	0.2	0.2	0.7	0.6	1.5	0	0	5.9	5.8	2.3	12.8	8.3	0.1	1.2	0.1	0	0	18.6	2.5	0.5	6.4	0	0.7	10.2	0	0.1	0.3
1998-11-25	6.8	7.5	2.1	18.7	25.3	1.6	26.2	0.2	36.4	52.9	0.4	0.1	0.7	0.6	5.1	1.2	0.1	0	24.1	6.5	1.8	0.1	0	0	0.7	0.2	0	0	1.4	0.7	0.3	0.1	4.2	6.9	0.2	0	0	0	0	0.2	0.2	10.5	13.1	3.7	6.7	5.6	5.1	6.5	0.1
1998-11-26	6.1	19.7	1	19.4	8.9	19.4	23.1	0	28.2	29	2.5	2.6	0.6	0.1	9.1	0.1	2.6	0	10.8	5.2	5.3	9	4	4	0.6	0.9	6.2	0.2	0	0	0	0	0	0	0.1	0	0	0	0	0.2	4.2	0	0.1	0	3.6	2.3	9.1	5.2	9
1998-11-27	37.7	4.5	49.9	27.9	25.1	0	0.6	0	3.4	0.4	0	0	0	0.2	0.1	0	0	0	1.2	0.2	1.9	0	0	0	0	0	0	0	0	0	0	0	0	0	0.3	0	0	0	1.1	1.3	0	9.5	11	0.8	0	0	0.1	0.2	0
1998-11-28	0	3.9	0.5	44.8	7.2	0.1	11.4	0	23.6	27.8	10.2	0.1	3.3	3.4	1	0.2	0.1	0.9	6.7	0	6.6	0.3	1.7	1.7	3.3	6.4	2.2	0.7	0.9	0.2	0.2	1.3	1	0.1	1.4	0.1	0.1	0.1	0.3	0.2	13.5	0	8.7	1.2	0.6	0	1	0	0.3
1998-11-29	0	0.3	0	1.1	0.5	21.3	4.1	2.5	0	1.5	0	0	0.1	0	0	12.4	0	11.5	0.6	0	0	0	0	0	0.1	0	0	0.1	0	0	0	0.4	0	0	0	0	0	0	0.1	0	3.9	10.6	0.3	0	8	28.8	0	0	0
1998-11-30	0.3	0.9	0	0.5	0	2.1	1.8	0.5	0.1	4.8	0	0.6	0.1	0	0.4	0.7	0.6	0.1	6.6	0	0	0.3	0.3	0.3	0.1	0.3	0.1	2	0	0	0	0.5	0	0	0	0	0.3	0.2	0	0	0	4	36.7	7.7	0.6	0	0.4	0	0.3
1998-12-01	45.1	7.5	46.9	17.6	0	0.3	0.8	0	0	10.4	0	0	0	0	0.1	0	0	0	0	0	0	0	0	0	0	0	0.5	0.2	0	0	0	0.5	0	0	0.7	0	0.2	0.3	0.6	0.2	0.2	1.3	3.6	0	0	0	0.1	0	0
1998-12-02	0.2	4.1	2.3	12.9	22	1.7	62.8	22.2	15.6	29.9	0.5	12.3	6.1	3.3	9.2	11.4	12.3	5.4	18	12	15.4	10.1	7.8	7.8	6.1	5.6	0.7	0.5	12.7	16.7	10.9	8	0	8.5	1.1	0.2	1.4	0.9	1.4	0.8	38.7	2	3.8	3	5.8	3.1	9.2	12	10.1
1998-12-03	0	0.4	0	2.6	7.4	2.4	12.1	4.3	3.1	11.3	0.1	2.7	4	2.9	1.4	7.2	2.7	1.3	2.6	0.7	2.3	2	2.6	2.6	4	2.9	0.6	0.3	6.4	20.9	13.5	0.5	1	23.9	4.8	0	0	2.1	8.4	18.1	16.9	0.3	5.5	16	0.3	0	1.4	0.7	2
1998-12-04	0	0	0	0.1	0	0	0	0	0	0	0.3	0.1	0	0.1	0	0	0.1	0	0	0	5	2.2	1.4	1.4	0	0.1	1.3	0.7	0.2	0	0	0.6	0.9	0.2	9.7	16.7	15.6	8.9	0.4	3.1	0	0	4	2	0	0	0	0	2.2
1998-12-05	0	0	0	0	0	0	0	0	0	0	0	0.1	0	0	0	0	0.1	0	0	0	0	0.9	0.7	0.7	0	0	0.1	0	0	0	0	0	0.1	0	2.1	4.9	1.6	0.4	1.9	0.3	0	4.3	9	20.6	0	0	0	0	0.9
1998-12-06	0	0	0.1	0	0	0.1	0	0	0	0	0.2	0	0	0	0	0	0	0	0	0	0	0	0	0	0	0	0	0.1	0	0	0	0.7	0.4	0.5	0.9	5.3	1.1	1.7	1.1	0.1	0.8	1.1	0.1	4.4	0	0	0	0	0
1998-12-07	1.3	2.5	2.1	0	0	0.2	0	7	0.5	0	2.7	1.3	1.9	2.2	0	7.4	1.3	9	1.1	1	7.3	0.3	0.2	0.2	1.9	0.3	1.4	0.3	0	0.2	0	0.6	0	1.1	0	0	0	0	0.3	0	0.9	4.2	5.3	1.2	4.7	0.3	0	1	0.3
1998-12-08	14.3	0	2	12.9	0	0.1	15	0	0	0	0	0	0	1.8	0	0	0	0.7	0	0	0.2	0	0	0	0	0	0	2.1	0	0	0	0.3	2.9	0	0.1	0.5	1.5	0	1.3	0	0	19	5.6	3	7.4	1.7	0	0	0
1998-12-09	0.3	0.3	2.2	0	0	0	0	0	0	0	4.5	0.4	44.4	11.6	0.2	1.6	0.4	1.8	0	0	0	7.1	32.9	32.9	44.4	83.1	0.3	0.7	1.9	8.2	0.2	0	0.3	11.1	6.4	4.2	5.8	3.5	0.4	0.5	5.2	0	11	2.8	6.4	0.1	0.2	0	7.1
1998-12-10	0	0	0	0	4.4	0.9	4.6	1.9	16.7	112.7	0.1	19.8	0	0	27.8	0	19.8	6.4	27.2	27.4	0.5	10.4	0	0	0	0	8.5	0	0	4.8	0.9	0	1.6	0.2	3.6	0	0	0.1	1.8	15.4	3.8	36.5	7	5	0.3	3.8	27.8	27.4	10.4
1998-12-11	0	3.8	0	0	3.7	0.1	48.2	2.9	14.1	34.2	101	0	10.3	0.1	3.9	13.3	0	11.5	12.2	5.1	0.9	0.1	0	0	10.3	0.9	8	2.9	1.3	32.4	3.8	0.2	2	0.9	0.1	0	0	0	0.4	0.6	45.3	4.7	0	23.1	0.3	1.2	3.9	5.1	0.1
1998-12-12	0	0.2	0	7.1	1.2	3.3	1.7	0.6	2.3	46.8	0	0.1	0	0	0	0	0.1	0	4.5	0	0	0.7	0	0	0	0	0	1	0	0	0	0.5	0	0	0	0	0	0	0	0	0	0	3.8	2.9	0	0	0	0	0.7
1998-12-13	0	0	0	2.2	0.8	11.6	3.5	18.9	0	32.7	0	2.8	0	0	0	13.4	2.8	1.2	0.4	1.4	0	2.6	0	0	0	0	0.1	0	3.5	26.7	0	0	0	2.1	5.9	0	1.6	4.9	0	0.7	14.8	2.3	2	0.3	3.3	20.4	0	1.4	2.6
1998-12-14	0	2.5	0	1	0	0	6.2	77.5	5.2	0	0.5	107.7	27.1	0	5.5	53.7	107.7	45.1	0	51.3	2	20.5	7.5	7.5	27.1	2.2	0.3	2.7	0.4	5.3	0.1	1	0	1.7	0.5	0	0	0	0	0	43	4.6	2	3.7	0	0	5.5	51.3	20.5
1998-12-15	2.5	1.1	5	0	0	1.6	1.1	1.8	0	3	1.2	3.3	8.7	0	0	9.2	3.3	7.1	0	0	0	0	0.5	0.5	8.7	1	0.4	0.4	0.2	0.1	0	0.8	0	0	1.7	0	0	0.7	0.2	0.3	0	4.4	8.6	5.4	3	12.1	0	0	0
1998-12-16	1.4	4	2.7	2.6	8.9	0.3	8.5	0.5	2.2	0.4	0.3	1.1	1.2	0.1	0.4	6.5	1.1	2.4	1	0.2	0	2.1	1.2	1.2	1.2	0	0.1	0.2	0.2	0.3	0.3	0.2	0	0	0	0	0	0	0	0	0	9	0	0.5	2.8	6.8	0.4	0.2	2.1
1998-12-17	0	0	0	0	7.6	0.3	3.6	0.6	0.4	0.3	0.3	1.4	2.8	0.9	0.1	3.1	1.4	1	0.2	0.2	5	0.9	6.9	6.9	2.8	7.3	0.4	0.7	0.1	0	0	0.6	0	0	0	0	0.2	0	0.4	0	0	67.6	4.8	2.6	14.6	21.6	0.1	0.2	0.9
1998-12-18	0	0	0	0	1.2	0.1	0.8	1.7	12.7	0	6.8	10	4	4.6	0.5	5.4	10	0.8	0.1	0.2	7	20.1	12.1	12.1	4	0.8	0	1	0.1	0.1	0.3	0.1	0	0	1.5	0.7	0.3	0	3.8	0.5	0	1.7	0.2	8.8	0	0	0.5	0.2	20.1
1998-12-19	1.3	0	14.2	0	0.5	0.8	0	0	0	39	0	0	0	0	0	0	0	0	0	0	0	0	0	0	0	0	5.5	2.3	0	0	0.1	0.2	0	0.8	0.1	1.3	0.1	0	0	0	0	7.6	0.2	0.3	6.5	2.1	0	0	0
1998-12-20	15.7	8.7	8.8	4.5	17.8	8.1	1.2	1.1	24.8	18.1	0.4	0	0.2	2.2	0.7	2	0	1.9	4.9	0	9.3	8.6	3	3	0.2	1.4	3.9	1.4	1.7	1	0.1	1	0	0.2	0.5	0	0.1	0	0	0	8.1	13.8	15.8	3.6	12.7	15.2	0.7	0	8.6
1998-12-21	13.3	34.6	33.5	16.1	14.2	2.3	18.8	2.8	18.1	0.1	3.4	0	0	0	0	0.7	0	0.8	0	0.1	0	0	0	0	0	0	7.8	19.3	10.8	44.9	18.8	16	20.3	47.3	17.3	2.6	2.5	0.8	2.7	6.9	10.9	5.3	3.2	0.2	1.3	15.2	0	0.1	0
1998-12-22	4.4	86.5	7.4	19.9	18.9	19.6	33.9	43.4	4	11.6	12.2	16.1	18.5	3.6	26.7	26.4	16.1	27.8	8	27.9	4.5	23.4	18.1	18.1	18.5	15.6	18.4	9.1	17.6	33.6	20.3	20.3	5.6	6.3	11	2.3	3.8	4.8	18.5	11	21.7	13.9	6.3	0	0.7	13.6	26.7	27.9	23.4
1998-12-23	4	7.1	9.9	3	1.4	0.9	1.2	0	26.3	12.8	3.8	0.2	3.3	0.2	17.3	9.5	0.2	8.8	0.7	7.9	1.7	0	0	0	3.3	0.2	3	1	2.9	3	1.1	0.3	6.7	0	13.6	14	6.4	1.1	0	0	17.9	9.3	1.7	1.6	0	0	17.3	7.9	0
1998-12-24	13.1	5	7.4	8.5	1.2	71.8	42.1	61.2	5.9	19.6	7.6	80.4	35.5	21.4	49.8	35.4	80.4	25.9	9.9	113.6	1.9	63.3	73.5	73.5	35.5	55.7	0.9	7.8	7.2	35.4	8.3	1.4	6.2	17.1	12.5	0	0.3	3.4	0.2	4.2	32.5	20.2	1.9	0.1	0	0	49.8	113.6	63.3
1998-12-25	2.1	12.2	0	28.1	9.8	15.3	5.7	0.4	5	26.6	4.8	1.3	6.1	0.3	8.5	20	1.3	9.9	7	4.8	0.6	3.3	2.6	2.6	6.1	3.6	1.3	3.8	8.7	15	14.3	2.7	2.2	4.7	1.4	4.1	3.7	3.2	0.5	0.2	2.9	12.5	0.2	0	3.2	1.9	8.5	4.8	3.3
1998-12-26	0	9.1	0	4.2	16.3	13.4	0.4	66.8	0.2	0	0.2	16.3	10	0	0.9	3.8	16.3	1.2	0.6	4.6	0	5.7	4.4	4.4	10	2.4	0	0.4	0	0	0	0.4	0.8	0	0.1	0	0	0	0	0.2	20	8.5	6.3	0.6	6.3	9.8	0.9	4.6	5.7
1998-12-27	0.1	1.4	4.1	0	0	0	0	4.2	0.3	0	0	0.1	0	0	0.3	1.8	0.1	0.1	0.7	0.8	0.8	0.1	0	0	0	0	0.6	0.8	0	11.9	19.8	0.4	0	5	0.8	0	0	0	0	0	0.3	28.8	2	6.2	0.1	11.6	0.3	0.8	0.1
1998-12-28	1.1	2	8.4	0.2	0	1.1	57.4	4.7	0	2.3	16.8	3.1	2.5	31.8	0.3	5.3	3.1	4.6	0	1.1	8.7	6.3	29.2	29.2	2.5	6.3	1.4	7.4	8.3	1.4	2.6	4.9	1.2	2.1	2.8	4	2.6	11	0	0.4	0.9	7.1	0.4	0.1	10.8	0.2	0.3	1.1	6.3
1998-12-29	3.3	0	5.3	1.6	0	0.2	6	2.8	0	0.1	23	2	2	0.8	0	0.5	2	0	0	1.1	0.1	0.6	3.8	3.8	2	2.8	0	3.8	19.9	15.4	21	18.8	0.5	23.2	45.5	33.5	10.4	2.5	0.6	0	10	6	2	0.1	3.9	0	0	1.1	0.6
1998-12-30	5.9	16.6	1.7	1.4	74.8	1	2.1	0	12.5	21	0.2	1.4	0.5	2.2	5.2	0	1.4	0	5.8	2.1	1.8	1.6	0.4	0.4	0.5	0.3	1.2	0.1	2.3	3.2	6.9	12.1	10.4	18.6	1.2	0.5	0.3	0.1	0	0.1	0.7	1.8	1.6	0.3	6.4	10.6	5.2	2.1	1.6
1998-12-31	3.3	33.4	6.4	4.5	1.2	0.1	0.6	8.9	3.5	2.4	0.3	3.9	0	0.1	7.2	0	3.9	0	5.2	3.8	1.8	1	0.7	0.7	0	0.2	1.1	0	0.4	0	0	4.8	0.5	0	6.2	4.3	0.2	0	0	0	0	8.8	0	16.4	5.9	1.7	7.2	3.8	1
1999-01-01	14.8	6	1	9.7	11.1	1.4	0.4	0	0	0.7	0.3	0	0	0	0	0	0	0	0	0.8	0.3	0	0	0	0	0	1.1	0	0.3	0.1	0	0.6	2.9	0.8	6.8	7.8	0.3	0	3	1.3	1.7	0.2	0.2	2.7	6.3	1.9	0	0.8	0
1999-01-02	60.7	51.5	33.2	19.2	17.9	2.6	7.5	13.2	13.9	65.2	45.1	31.7	13.3	30	24.4	21.1	31.7	30.2	24.5	9.2	16.2	21.8	13.3	13.3	13.3	28.1	3.7	8.6	15.6	19.3	3.5	5.5	0.4	2.3	0.4	0.4	0.1	0.7	0.6	0.6	68.8	0	1.5	3.1	17.9	12.1	24.4	9.2	21.8
1999-01-03	22.3	12.1	70.2	17.5	14.6	25.5	39.9	17	24.9	17	46.9	17.1	26.3	46.5	12.2	11.4	17.1	13.7	19.8	7.1	27.9	11.4	10.4	10.4	26.3	13.4	61.7	19.1	12.8	25	10.6	19.8	1.3	26.5	0.7	1.2	0.8	1.2	0.1	0	66.6	0	4.7	12.1	0	0	12.2	7.1	11.4
1999-01-04	87.6	33.6	17.6	16.1	0	3.8	31.9	1.1	7.6	0	9.9	0.1	7.6	8.5	1.3	3.4	0.1	5.7	1	8	0	0.2	2.2	2.2	7.6	1.2	60.4	76.9	4.6	3.9	7.3	65	12	4.4	4.7	0.8	0.6	0.9	2	1.3	5.6	0	0.3	7.5	0	0	1.3	8	0.2
1999-01-05	24.2	2.6	15	31.2	68.1	0.8	11.8	3.7	41.3	0	4	6.7	2.7	4.3	0.3	1.2	6.7	0.5	11.8	2.3	16.2	12.2	9.7	9.7	2.7	3.1	13.7	7.1	4.6	0.7	0.6	3	0.3	0	1.2	1	2.4	3.4	2.3	10.5	3.4	0	4.4	2.9	0	0	0.3	2.3	12.2
1999-01-06	0.4	1.1	11.8	15	4.5	0	23.7	6.8	10.7	93.7	9.8	9.9	6.9	2.7	7.7	15.2	9.9	3.8	10.8	4.9	7.5	7.1	7	7	6.9	3.2	16.8	10.3	15.8	9.7	7.7	14.9	5.2	2.3	1.5	0	0.3	0.5	1.4	2.2	11.9	3.8	14	8.2	0	0	7.7	4.9	7.1
1999-01-07	29.6	1	14	0.2	0.6	33.3	15.9	16.9	3.5	5.7	11.8	7.8	14.5	12.5	14.9	8.1	7.8	19.7	7.1	13.5	28.5	15.7	19	19	14.5	23.4	2	2.8	8	2.1	5.1	9.1	7.2	9.2	7.7	2.7	2.1	2.2	0	0.1	4	0.1	11.6	6.4	0	0	14.9	13.5	15.7
1999-01-08	0	4.4	33.9	0	22.5	79.8	13.4	0.1	18.5	7.7	22.9	0	13.1	10.3	2.8	15	0	48.7	1.8	0.1	46.1	2.3	8.9	8.9	13.1	7.4	0.5	0.4	0.9	1.3	1.9	4	11.2	1.3	8.3	0.5	0.5	0.7	4.6	3.1	13.1	8.3	4.6	7.7	0	0.6	2.8	0.1	2.3
1999-01-09	0	6.8	67	0	49	33.4	0	38.3	12.1	4.5	0.1	49	22.7	42.9	113.8	17.7	49	5.2	17.2	126	39.7	58.8	61.6	61.6	22.7	39.5	2.9	0	0	1.2	0.3	2.2	4.8	3.8	11	11.5	4.4	0.7	3.6	0.7	5.9	0	0.6	18.1	0.6	0.7	113.8	126	58.8
1999-01-10	4.1	9.4	0.4	4.7	12.4	3.7	6.4	10.3	24.7	3.7	0	11.8	0.5	0	0.2	4.6	11.8	5.5	3.9	1.1	1.3	0	0.3	0.3	0.5	0	0	0.6	0.1	0	0	0.3	0	0.4	0.3	0.6	0.9	1.9	0.2	0	0.4	38	0	9.1	25.1	19.3	0.2	1.1	0
1999-01-11	12.6	5.9	0.3	20.2	1.4	42.6	4.5	0	0.1	45.7	0	0.1	0	0.3	0	0.6	0.1	1.3	0	0	3	0.1	0	0	0	0	4.6	0.7	1.9	2	1.4	1.9	9.8	4	20.3	11	15.6	11.1	34.7	36.8	0.8	4.5	4.1	6	23.5	17	0	0	0.1
1999-01-12	23.6	16.8	33.2	15.7	83.3	15.7	1.8	30.5	60.3	40.4	0.2	49.5	21.8	5.5	38.8	74.9	49.5	71.2	41.6	25.4	29.1	38.8	25.3	25.3	21.8	8.8	1.4	0.3	2.1	1.7	0	0.5	0.5	0	0.2	0.2	0.4	0	0.5	2.5	3.8	6.3	0.3	17.1	17.7	0	38.8	25.4	38.8
1999-01-13	6.1	9	4.1	18.8	63.5	11.8	6.1	4.7	41.2	75.5	9.5	13.2	16.8	30.8	5.7	9.3	13.2	8.5	9.7	6.8	35.3	28.9	37.3	37.3	16.8	24.2	16	1.7	0.7	18.8	7.4	0.5	0	25.1	28.5	47.3	58.5	27.3	1.4	22.5	30.1	8.8	0	2.5	0.2	0	5.7	6.8	28.9
1999-01-14	25.1	14	33.8	26.9	18	0.5	75.7	12.1	50.7	15.4	17.5	4.8	4.4	3.8	5.7	8.5	4.8	25.4	2.1	11.9	0	0.9	0	0	4.4	5	0	4.5	5.7	5.7	1.6	27.4	3	2	56	21.2	18.7	4.2	3.3	3	4	0.1	2.4	11.1	0	0	5.7	11.9	0.9
1999-01-15	18.6	16.5	40.5	7.4	0	0.1	80.3	6.3	3.4	0	14.2	3.1	11.3	5.7	0	15.1	3.1	25.4	9.1	0	21.7	9.6	2.1	2.1	11.3	12.6	4.3	0.2	28.2	4.1	4.4	8.3	1.4	2.7	16.4	2.9	3.7	3.7	2	5.9	8.3	0.3	1.5	21	0	0.1	0	0	9.6
1999-01-16	6.2	6.6	2.1	5.2	1.1	1	3.2	1.3	9.2	0.7	6.1	3.3	17.9	25.7	0.7	17.4	3.3	23	5.8	0	7.7	3.7	18.9	18.9	17.9	20.8	5.5	8.3	9.8	12.7	17.3	13.4	9.4	10.1	20.1	2	4.8	2.4	9.2	10	7.6	0.5	0.2	4.2	0	0.6	0.7	0	3.7
1999-01-17	84.3	33.7	22	33.1	5.5	1.8	13.2	14.9	27.9	16.6	11.7	12.7	2.7	0.2	39.8	3.4	12.7	0.8	17.6	38.7	8.8	10.9	5.6	5.6	2.7	1.5	6	14.1	25.1	20.7	28.7	30.9	30.3	22.4	11.1	10.7	8	6.4	16.3	20.5	13.4	1.5	0.2	0.4	2.7	0	39.8	38.7	10.9
1999-01-18	4.4	24.8	3.2	2.2	15.9	0.1	15.9	33.1	1.9	2.6	8.5	25.4	1.9	1.6	55.8	6.1	25.4	1.6	6.7	55	8.2	16.6	10.1	10.1	1.9	0.8	4.6	5.1	3.1	2	1.2	3.9	11	0.8	2.4	0.2	0.8	0.7	6.3	1.3	2	15	0.2	0	0.2	0.7	55.8	55	16.6
1999-01-19	1.1	7.4	3.6	2	0	0.3	17.4	1.4	0.3	0.9	1.9	3.5	11	3.4	18.2	5.3	3.5	10.2	7.4	22.5	15.2	7.4	16.6	16.6	11	15	3.4	19.2	25	2.4	7.2	5	15.9	7.4	3.4	0.6	2.3	1.1	6.1	5.9	1.5	3.6	1.6	1.8	10.9	0.3	18.2	22.5	7.4
1999-01-20	8.5	5.2	3.9	6.4	0	0	12.3	1.1	0.1	0.1	1.4	0.9	0	1.1	0.1	0.2	0.9	0.3	0	0	1.1	1	0	0	0	0	0.2	5.8	2.6	7.1	4.6	5.6	0	0.6	0	0	0	0.3	4	6.5	5.3	1.4	0.3	7.6	1	1.4	0.1	0	1
1999-01-21	4.1	19.9	0.2	3.6	0.4	0.5	0.9	9	0.1	0.2	0.4	18.4	0	1.2	3	0	18.4	0.2	0	0.7	8.2	11.3	4.7	4.7	0	0	0.1	2.5	1.4	1.4	2.5	3.1	0	2.5	0.2	0.5	0.3	0.5	10.9	14.3	0.2	38.5	2.9	6.8	4.8	24.6	3	0.7	11.3
1999-01-22	0.1	2.7	1.4	0.3	1.2	0.2	6	0.7	8.8	18.6	6.5	0.2	0.2	5.9	2.8	0.3	0.2	0.4	1.8	0.3	14.4	3.2	3.3	3.3	0.2	3.6	1.2	1.3	13.2	6.3	9.8	1.6	10	1.3	0.1	3.7	3.7	3.7	12.7	13.7	0.5	9.4	0.9	1.2	11	6.7	2.8	0.3	3.2
1999-01-23	25.9	2.7	26.6	6.4	2.2	1.8	0.3	9.9	4.8	2.4	0.1	16.9	8.9	0.6	9.1	4.9	16.9	1.8	14	7.3	1.7	25.3	11.9	11.9	8.9	1.1	0	0.3	0.1	2.4	1.1	1.1	10.1	10.9	12.5	10.7	13.6	9.5	2.2	6	19	5.1	0.5	5.6	4	15.6	9.1	7.3	25.3
1999-01-24	26	1.9	19.3	32.2	2.9	1.5	16.9	0.2	0	0	0	0	1.6	1.1	0	0.9	0	0.9	0	0	0.4	1.9	5.5	5.5	1.6	0.6	0	1.3	1.4	2.3	2.8	12.2	10.5	12	9.1	61.1	31	4	11.8	16.8	10.6	33.8	2.7	4.1	0	6.2	0	0	1.9
1999-01-25	0.1	3.6	0.9	1.6	0	19.1	4.1	0	0	6.6	3.7	0	2.9	0	0	1.3	0	21.6	0	1.9	12.1	1.2	20.6	20.6	2.9	1	5	0	0.3	14.3	0	3.1	15.6	23.6	0	42.2	0	0	0.2	0	13.2	0.7	2.7	2.9	0	0	0	1.9	1.2
1999-01-26	0	0	0.3	0	0	6.8	0	0	9	0	1	0	0.2	18.9	0	1.3	0	0.7	0	0	1.1	0	0.9	0.9	0.2	1.6	5.2	1.9	15.1	20.7	3.7	1	14.1	12.3	12.2	8.4	0.2	0	2.2	29.2	41.5	0	37.9	12.3	0	0	0	0	0
1999-01-27	1.9	0	22.2	22.8	3	11.7	8.4	0.8	6	0.3	14.1	1	3.7	18.8	1.2	5.5	1	5	0.7	0	23.9	3.6	5.4	5.4	3.7	4.7	45.3	35.4	30.5	8.5	7.3	27.7	11.1	1	4.5	5.8	5	2.3	1.1	3.2	21.8	0	2.1	0.1	0	0	1.2	0	3.6
1999-01-28	0.4	0	3.6	0	46.7	1.5	41.2	46.4	40.4	21.2	15.9	43.5	16.1	45.3	63.3	10.7	43.5	18.3	78.4	34.7	51.5	43.7	32.6	32.6	16.1	22.5	47	19.2	14.6	15.4	15.8	7	7.9	16.6	17.9	9.8	8.5	14.3	1.4	0	5.1	0	1.6	0	0.6	0.7	63.3	34.7	43.7
1999-01-29	0.1	0.9	0.7	0.2	7.4	0.3	4.1	8.2	3.6	5.4	25.7	8.8	17.6	12.8	12.3	20.8	8.8	27.4	13.6	6.5	20.7	13.7	17.9	17.9	17.6	12.5	3.5	4.7	14.4	8.7	6.8	2.6	1.3	3	14.8	0.6	0.2	0.3	4.3	13.5	16.9	2.9	0	0	0	3.9	12.3	6.5	13.7
1999-01-30	19.5	18	5.8	23.4	55.3	7	5	44.6	43.4	15	10.8	38.6	39.5	17.2	48.6	33.2	38.6	35.2	54.2	37.8	48.7	85.2	67.6	67.6	39.5	34.7	20.7	0.3	26.8	0.3	0.4	1.3	0	0	0	13	14.7	6.4	0	0	1.2	22.1	9.4	0.9	17.8	1.9	48.6	37.8	85.2
1999-01-31	6.4	6.8	0	29.1	1.9	2.7	32.7	10	6.2	12	11.9	12.4	11.3	8.2	18.9	19	12.4	20	40.1	14.8	20.9	15.4	16.7	16.7	11.3	13.1	3.6	10.2	49.5	49.9	41.7	18.7	52.1	9.7	8.5	0.7	4.5	1.8	6	3.2	28	15.2	4.8	45.8	18.5	15.7	18.9	14.8	15.4
1999-02-01	7	10.4	36.8	2.3	3.2	0.1	12.2	3.3	0.8	56.8	4.7	4.7	0.4	0	7	4.3	4.7	6.8	8.5	1.8	16.6	0.4	1.1	1.1	0.4	0.2	39	49.8	9.8	36.4	26	15.1	59.9	24.6	18.9	14.1	11.1	1.8	0.4	0	16.1	6.6	1.4	22.2	4.2	21.3	7	1.8	0.4
1999-02-02	23.4	10.6	51	10.1	9.8	18	3.4	0	2.6	7.4	10.9	0	0	0	1.2	0.4	0	0	2.2	1.1	0	0	0	0	0	0	13.6	19.2	2.6	0.4	7.2	38.3	15.4	1.4	12.1	8	4.4	0.1	14.8	38.8	2.3	13.4	0	5.5	4.5	0.3	1.2	1.1	0
1999-02-03	31.1	11.9	11.8	31.1	0.6	4	0	0	0.1	2.3	0.4	0.2	0.1	0.2	0.6	0.4	0.2	0.6	1.2	0.2	0.1	0.1	0	0	0.1	0	0.2	1.6	0	6	1.3	0.5	0	0.3	1.9	0	0	0	0.3	0.3	0.7	4.4	0	1.3	15.3	4.5	0.6	0.2	0.1
1999-02-04	22.9	8.2	17.7	16	0	0.8	14.7	0.2	0	0.7	0	1.2	0	0.1	0	0	1.2	0	0	0	0.3	0.3	0	0	0	0	0.1	0.2	0	0	0	0.6	0	0	0.8	0	0	0	0.2	0.3	0	8	1.4	1.3	50.1	8.6	0	0	0.3
1999-02-05	13	18.5	9.2	7.2	0	4.3	0	0.9	0	0	1.1	0.4	0	0	0	1.7	0.4	2.1	0	0	0.3	0	0	0	0	0	1.1	0.3	0.2	1.5	11.6	2.7	0	1.8	2.3	0	0	0	0.5	0.1	1.8	1.2	0	0	0.2	0	0	0	0
1999-02-06	9.9	21	1	12.4	0	0.3	33	0	0	0.3	0	0	0	0	0	0	0	0	0	0	0	0	0	0	0	0	0	0.1	0	0	0	0.7	0.2	0	0	0	0.4	0	0	0	1.2	4.3	1.2	0	0.2	0.4	0	0	0
1999-02-07	0.6	0.8	0.7	3.4	1.9	0	2.2	0	0	13.7	0	0.1	0	0	0	0.1	0.1	0.2	0	0	0.1	0.1	0.1	0.1	0	0	0	0	2.5	1.7	1.2	0	0.3	1.5	1.2	0.9	1.1	1.5	0	0	0.4	10.6	1.3	43.7	10.6	0.3	0	0	0.1
1999-02-08	14.9	6.1	1	2.9	1.2	0	8.4	0.1	0.1	0	7.2	0.1	1.9	2.7	3.3	3.5	0.1	3.8	0.8	2.7	0	0	0.2	0.2	1.9	1.8	0.6	0.1	6.4	6.4	3.7	0.5	1.2	5	1.5	2.5	0.8	0.5	0.3	1	12.5	8.5	1.9	10.4	0	5.4	3.3	2.7	0
1999-02-09	2.1	0	1.5	1.5	0.1	4.3	5.6	0	0	0	0.3	0	8.2	0.7	0	2.1	0	2.4	0.2	0	0	0	0	0	8.2	9.3	0	0	3.3	0.2	0.6	0	0	0	6	0	0.1	0.5	4.1	3.9	1.9	3	2.9	1.7	0	0	0	0	0
1999-02-10	2.1	0	0	1.6	6.6	45.4	0	0.1	4.4	1.3	0	0.2	0.1	0	0.6	0	0.2	0	1.4	0.3	0.6	0.4	0.1	0.1	0.1	0.1	0	0	0	0.8	1	2.4	0	0.1	0	1.8	0.3	0	5.1	16.3	0.4	0	0.7	34.7	0	0	0.6	0.3	0.4
1999-02-11	0.2	0.4	1	0	9.9	41.6	2.7	0	2.2	0	1	0	2.2	5	0	1.5	0	3.8	0.1	0	0	0	0.1	0.1	2.2	2.4	27.8	42.3	19.8	28.5	31.5	18.3	1.8	0.2	2.8	13.1	23.1	26.3	13.1	12.1	16.6	0	2.3	0	0	0	0	0	0
1999-02-12	0	0	0	0	0	0.7	1.9	1.7	0	0	2.9	2	12.9	5.3	0.3	11.9	2	10.7	0	0.3	5.9	1.8	7.9	7.9	12.9	12.5	0	1	1.3	2.2	1.8	2	2.9	0.8	8.1	7	8	6.4	22	16	2.6	0	0	0.5	0	0	0.3	0.3	1.8
1999-02-13	12.4	3.9	8.9	3.6	0.1	11.6	0.3	2	2.3	2.5	0.7	4	0	2	1.2	0	4	0	0.7	0.2	0.1	2.4	0	0	0	0.5	0	0	2.5	0	0	0	0	0	0	0	0	0	0.4	0	0	0	0.4	2.1	0	0	1.2	0.2	2.4
1999-02-14	9.3	26.7	2.7	10.6	0	4.6	0	4.7	1.1	0	0.5	4.7	1.5	0.1	0.6	1.1	4.7	0.4	2.9	0	0.8	6.3	2.2	2.2	1.5	2.2	1.4	0.3	0	0	0	0	8.8	1.5	1.3	1.6	0.1	2.2	0	0	0	6.5	1.7	8	0.8	3.2	0.6	0	6.3
1999-02-15	0	1.8	0	0	9.8	26.9	0	0	0.1	0	0	0	0	0	0	0	0	0	0.1	0	0	0	0	0	0	0	0.1	0.6	0.2	2.5	15.3	4.2	7.9	3	0	0.6	0	0.6	5.4	3.7	0.8	51.3	0	3.7	0	0	0	0	0
1999-02-16	1.2	2.5	12.3	0	0.9	0.3	0	0	0.2	3.3	0	0	0.1	2.7	0.3	0	0	0	1.7	0.3	0	0	0.2	0.2	0.1	0.4	0	0.3	0	1.2	2.1	1.9	4.3	0	0	0	0	0	0.7	3.3	0	35.3	40.9	1	0	0	0.3	0.3	0
1999-02-17	0	0	0	0	27.4	0	0.4	3.5	23.4	0.2	2.1	4.8	40.5	45.5	0.1	41.8	4.8	50.6	0.7	0.1	7.5	5.2	21.4	21.4	40.5	31.6	5.6	32.4	0.9	4	5.3	21.1	20.7	2.5	0	0	0	0	0	0	1.1	3.9	41.8	35.1	0	0	0.1	0.1	5.2
1999-02-18	2.6	12.8	10	2.6	4.3	0	4.9	1.9	2.2	11	0.3	1.9	2.6	3.5	4.8	1.6	1.9	1.1	0.5	3.4	2.3	2.2	12.1	12.1	2.6	24.4	0.5	15.2	26	0.5	5.9	76.9	10.5	7.3	0	0	0	0	0	0.5	13.9	0.2	25.6	0.5	14.8	0	4.8	3.4	2.2
1999-02-19	14.5	2	19.1	7.8	3.5	22.2	16.6	1	27.1	27.5	0	1.5	1.7	0	5	0.1	1.5	0.1	2.6	4.2	1	3.3	1.8	1.8	1.7	0.7	0	0.2	0.2	15.1	15	1.4	8.2	51.2	2.1	0.2	0.1	0	1.9	0.5	31.3	0.1	1.1	0.2	120.5	0.1	5	4.2	3.3
1999-02-20	59.3	44.3	1.6	108.5	18.5	2.4	0.4	3.7	36.4	8	1.3	5.9	4.6	0	42.3	7.9	5.9	1.1	39	80.5	28.1	10.6	6.9	6.9	4.6	1.5	4.6	1.4	0	0	0.2	1.5	0.5	0.1	0	0	0	0	3.9	7.6	0.2	4.1	1.6	0	10.1	0.4	42.3	80.5	10.6
1999-02-21	26.2	1.5	0.2	15.7	4.2	0.5	0	19.8	10.6	90.1	0.8	32.5	14.1	1.7	7.1	51.6	32.5	17.8	5.7	6.4	8.6	46.1	54.7	54.7	14.1	19.9	0	0	1.8	1.6	0.2	0	0.3	0	2.2	0	0	0	0.7	0.4	3.7	5.3	7.5	0	0	0	7.1	6.4	46.1
1999-02-22	27.8	0.9	0	0	0.1	0.7	13.2	2.6	1.4	0	12.3	12.9	13.5	18	9.5	7.1	12.9	16.9	5.1	14.7	18.2	18	17.9	17.9	13.5	15.9	5.6	9.3	22.6	59.5	32.2	6.7	3.4	8.4	0.5	0	0	0	1.8	3.1	25.4	6.5	1	3.7	0	0	9.5	14.7	18
1999-02-23	75	4.6	6.2	1.5	1	1.1	4.7	0	1.1	17.2	21.8	2	13.1	2.1	0	0	2	0.3	3.7	0.1	2	0.4	0.5	0.5	13.1	4.6	21.4	9.9	16.5	39.3	21.9	15.1	1.5	36.2	0.5	0.2	3.1	0	0	0	17.9	1.2	0.1	2	0	0	0	0.1	0.4
1999-02-24	4.4	0.3	1.3	1	0.5	17.9	16.6	0	1.2	7.9	0	0	0	0	0	0	0	0.8	4.5	0.7	0.1	0	0	0	0	0	8.1	0	3	22.1	11.1	7.6	2.9	8.1	17.5	4	3.2	2.1	1.7	1.8	14.2	0	1.7	0.6	0	0	0	0.7	0
1999-02-25	1	5.2	0.4	0.4	0	0.8	0	0	0	0	0.2	0	0	0	0	0	0	0	0	0.1	0	0	0	0	0	0	0	0.3	1.6	0	0.1	0.7	2.9	0.5	15.4	9.1	0.8	0.3	0.8	3	1.4	0	13.6	0.5	0	0	0	0.1	0
1999-02-26	16.5	7.2	13.5	20.6	2.3	0.1	2.7	2.2	14.1	49.5	6.5	7.6	7.4	0	1.1	1.5	7.6	1.8	1.7	5.5	5.1	5.4	16.3	16.3	7.4	9.2	0.5	18	20.1	4.6	7.9	27.2	31.3	1.2	2.5	22	9.7	4.1	0.5	5.5	4.4	0	2.5	3.4	0	0	1.1	5.5	5.4
1999-02-27	35.4	11.1	13.1	39.3	0	3	6.7	0	0	2.8	0.2	0	0	0.2	0	0	0	0.1	0	0	0.2	0	0	0	0	0	0.6	5.5	0	0.5	0	22.3	0	0	0.1	7.6	0.3	1.4	0.4	2	3.3	0	2.2	3.5	0	0	0	0	0
1999-02-28	0	0.7	0	3.8	0	0.7	22.9	0	0.8	6	33.6	0	0	4.6	0.2	0	0	0.2	2.1	0	1.3	0	0.4	0.4	0	0.5	5.4	7.6	17.8	7.4	7	5.7	5.7	50.9	2.1	12.5	10.2	10.1	0.8	1.6	4.7	0	0.2	3.2	0	0	0.2	0	0
1999-03-01	0.5	0.1	0	22.6	0	0.5	5.6	0	0	0	7.4	0	0	0.4	0	0	0	0.1	0	0	0	0	0	0	0	0	39.3	11.4	9.9	3.3	4.4	4.4	2.6	5.5	0.7	2	1.6	1.1	3.1	5.5	8	0	2.1	0	0	0	0	0	0
1999-03-02	0	0	0	0	11.1	21.6	0	0	1.5	0	0.4	0	0.1	0.2	0.1	0	0	0	0	0.1	0	0.1	0.2	0.2	0.1	0.1	11.7	29.2	27.6	26.6	27.8	21.8	0.6	9.5	14.8	2	2.6	2.7	13	12.5	22	0	7.2	12.6	0	0	0.1	0.1	0.1
1999-03-03	0.4	0	0	0	6.5	21.2	0.4	0	0.1	6.4	0.5	0	1.9	1.4	0	1.4	0	1.4	0.1	0	0.3	0.3	0.8	0.8	1.9	0.9	0	0.1	0.3	0.9	1.1	0	12	1.6	0	0	0	0.1	1.5	0.5	0.6	0.8	0.1	0	0.2	0.1	0	0	0.3
1999-03-04	0.1	0	0.4	0	0	7.6	0	0.1	1.5	1.4	0.6	0	0	0.6	0.5	0	0	0	3	1	0	0	0	0	0	0.1	0.7	2	0	14.4	14	11.4	22.6	18.4	1.1	1.2	0.7	2.3	4.8	2.7	11.8	0	0.2	3.4	0	0	0.5	1	0
1999-03-05	10.4	1.8	9.4	0	4.2	0.4	0.3	4	1.7	0	1.1	4.1	1.5	1	3.1	4.5	4.1	2	1.3	1.8	0	2	0.9	0.9	1.5	0.2	20.7	5.6	1.3	6.4	3.5	9.7	20	1.5	3.8	5.1	2.9	2	0.1	0.8	1.3	0	0.9	4.2	0.4	0.1	3.1	1.8	2
1999-03-06	0	0	0	0	0	0.2	0.1	0	0.1	0	2	0	0.2	1.3	0	0.3	0	0	0	0	0	0.1	0	0	0.2	0	0	0.3	0.3	0.5	0.8	0.6	22.5	4.2	25.7	31.1	21.6	11	8.1	0.6	3.2	0.1	6.7	7	3	0	0	0	0.1
1999-03-07	0.1	0	0	0.2	0	0	0	0	0	0	3.3	0	0.2	10.8	0	0.2	0	0.2	0	0	1.2	0	0.2	0.2	0.2	0.9	3.4	1	0.3	5.4	0.2	3.9	3.7	0.4	12.5	46.6	8.7	4.3	8.2	1.3	12.2	5.4	5.1	4.4	0	0	0	0	0
1999-03-08	3.1	0.7	0	0	0	2.7	0	0	0	0	12.4	0	0	1.4	0	0	0	0.1	0	0	3.6	0	1.5	1.5	0	0	24	18.6	6.3	1.7	5.3	48.4	27.6	16	8.9	34.7	14.2	7.2	3.4	0.6	1.2	1.7	3.5	1.8	0	0	0	0	0
1999-03-09	0.1	2	0.1	0	0	6.3	0	0	0	0	20.6	0	0.1	4.8	0	0.2	0	1.8	11	0.2	2.5	0	0.1	0.1	0.1	0	0.4	0.6	0.7	7.2	6.7	1	1.5	0.4	6.2	12.1	5.4	0.2	0.1	0	4.5	0	0	4.1	0	0	0	0.2	0
1999-03-10	0	0	0	0	17.5	0	0.4	2.9	0	0.7	4	4.3	4.4	30.3	0	3	4.3	16.8	0	0	13.4	4.8	3.9	3.9	4.4	5.6	24.4	9.1	9.1	10.9	8.7	8.2	8.2	4.8	0.9	4.1	3.1	1.3	7.8	9.5	17.9	0.4	0	8.9	0.1	0	0	0	4.8
1999-03-11	0	0	0	0	0	0	17.4	2.2	2.4	0	26	7	18.9	3.1	0	9.3	7	9.8	0	0	6.8	7.4	13.2	13.2	18.9	31	16.7	19.6	33.6	34.1	36.5	36.7	1.9	0.1	1.4	3	2	0	18.1	15.6	35.9	0	0	3	0	0	0	0	7.4
1999-03-12	0	0	0	0	0	0	8.2	1.7	1.4	3	14.3	1.2	0.4	0	0	3.4	1.2	0.1	26.2	0	0	0	0.1	0.1	0.4	0	4.7	1.8	5.5	1	0.7	4.1	1.1	0.8	1.6	0.3	0.1	2.6	0.8	0.4	1.7	0	0	0.7	0	0	0	0	0
1999-03-13	0	0	0	0	0.4	0	0.2	2.9	4.7	0	14.2	3.9	0.2	5.6	22.5	0	3.9	0.9	26.2	18	8.9	5.1	2	2	0.2	4.4	5	6.9	11.6	15.6	21.3	15.5	4.7	9.8	1.9	2.2	12.9	10.7	6.3	18.4	10.9	1.1	0.6	4.9	0	0.6	22.5	18	5.1
1999-03-14	0.5	1	0	0	0	0	0	0.8	0	0	0	0.4	0	0	0.5	0	0.4	0.1	0	1.7	0.2	0.3	0.4	0.4	0	0	0.6	0.6	8.1	9.7	6.9	16.5	10.1	11.7	23.3	35	34.9	17.7	2.6	7.4	9.2	35	3.8	8.1	0.1	0	0.5	1.7	0.3
1999-03-15	2.1	1.8	0	3.6	0	0.8	0	0	0	0	0	0	0	0	0	0	0	0	0	0	0	0	0	0	0	0	0.5	6.3	0.9	16.6	14.9	16.1	2.2	23.5	27.6	29.2	8.3	3.7	1.3	4.2	0.3	4.4	1.6	5.7	22.4	23.5	0	0	0
1999-03-16	0	0	0.2	0	0	0	0.6	0	0	0	0.1	0	0	0.3	0	0	0	0	0	0	0	0	0	0	0	0.3	0.3	0	1	33.1	18.5	6.8	4.2	10	1.6	10.1	5	2.1	4.9	1.3	22.2	1.3	0.2	1.5	36.3	28.1	0	0	0
1999-03-17	0	0	0	0	0	3.7	0.6	0	0	0	5.3	0	0	0	0	0	0	0	0	0	0	0	0	0	0	0	0.6	1	2	4.6	2.6	5.3	4	0.3	2	13.3	1.3	3	3.3	7.6	9.9	0	0.4	0	0	0.4	0	0	0
1999-03-18	0	0	0	0	0	1.7	0	0	0	0	0	0	0.1	1	0	0	0	0	0	0	0	0	0	0	0.1	0.4	2.3	2.9	3.5	4.2	4.4	0.4	3.9	1	9.5	18.2	17.9	7.1	3.6	2.2	6.2	0	19.7	12.1	0	0	0	0	0
1999-03-19	0	0	0	0	0	0	0	0	0	0	7.4	0	0.1	0.2	0	0	0	0	0	0	0	0	0	0	0.1	0.1	0	0	0	0.1	0.1	0.5	18.6	7.6	8.6	19.8	29.1	49.1	47.1	44.3	0.2	9.2	0.1	5.9	2.5	0.1	0	0	0
1999-03-20	0.5	0.2	1.9	0	8.2	2.4	0	0	33.2	0	7.5	0	0	0.5	0	0	0	3.4	14.4	0.4	4.9	0	0.2	0.2	0	2.5	19.9	12.3	2.1	1.1	4.4	13.2	17.1	3.9	9.5	30.2	52.3	61.1	8.1	7.5	0.6	17.3	0.3	15.2	5.6	17.5	0	0.4	0
1999-03-21	0	0	0	0	6.7	43.9	0.1	2.5	0.4	0.2	19.3	0.6	10.2	1.8	1.6	50.6	0.6	85.6	9.7	2.5	9.3	12.1	3	3	10.2	10.5	4.2	1.3	20.3	16.8	4.1	4.3	23.5	0.7	21.5	12.5	14	11.2	5	24.2	4	15.6	2.1	0.1	22.3	19.5	1.6	2.5	12.1
1999-03-22	3	6	0.1	0	0	4.7	0	0	0	0.3	1.7	0	0.5	0.3	0	0.3	0	8.4	0	0	0.2	0.8	4.7	4.7	0.5	1	0	2.6	15	27.5	0.9	5.9	0.1	29.6	5.5	16.6	1.5	0	8.8	16.6	4.5	0.7	0.8	0	22.1	100.6	0	0	0.8
1999-03-23	0.5	11.2	21.5	0	1.8	1.3	0	5	16.4	38.4	4.4	0.9	2.2	2.8	0.5	2.7	0.9	5.5	0.7	7.3	1.4	0.1	0.4	0.4	2.2	5	12.5	4.3	3.5	9.3	16.3	8.6	3.3	1.9	0	0.3	0.1	0	0.8	12.6	0.7	2.3	0	1.1	21.3	32.7	0.5	7.3	0.1
1999-03-24	0	14.2	0.6	0	0.1	0.8	1.3	1.6	0	0.2	3.7	0.4	0.5	2	0	3.2	0.4	0.1	0	0	0.3	0	0.3	0.3	0.5	0.4	0.5	6	1	1.1	0.4	19.2	6.2	0.1	6	7.8	0.8	0.1	4.5	4.7	2.3	6.9	0.1	3.6	0	0	0	0	0
1999-03-25	0	0	0	0	0.1	1.7	0	0	0	0	0	0	0	0	0	0	0	0	0	0	0	0	0	0	0	0	0	0	0	0	0	1.7	0.1	0	1.5	0.3	5.3	1	3.8	20.5	0.2	0	0.1	0	0	0	0	0	0
1999-03-26	0	0	0	0	0.1	4.3	0	1.4	0	0.1	0.1	3.5	0.6	1.3	0.4	0.3	3.5	0.8	1.7	0.5	5.9	3.4	0.1	0.1	0.6	0.6	0.1	0	0	0	0	0	1	0.2	7.2	6.3	8	10.3	8.8	12.2	0	0	1.5	3.5	0	0	0.4	0.5	3.4
1999-03-27	0	0	0	0	22	36.7	2.7	6.5	14.7	0	2.2	7.1	2.1	1.8	18.8	0.7	7.1	2.4	5.1	12.6	11.4	3.9	1.5	1.5	2.1	3.1	10.1	2.5	2.9	0.3	0.9	2	17.2	3.9	35.5	55.7	50.7	2.1	1.5	10.6	0	0	0.1	4.3	0	0.5	18.8	12.6	3.9
1999-03-28	0	0	0	0	0	23.5	0.5	1.7	1.2	0.5	0	0.6	1.1	0	7.9	1.3	0.6	1.4	1.1	11.7	0	0.1	0	0	1.1	0.2	0	0.2	1.6	0.7	1.2	0	4.7	46.7	23.8	48.8	28.6	9.8	48.3	24.5	0	0	0	0.1	0	0	7.9	11.7	0.1
1999-03-29	0	0	0	0	0	1.5	0	4.2	0	0	0	0	6.3	4.7	0.1	0.9	0	0.8	0.1	0.2	1.2	2.4	1.2	1.2	6.3	3	0.3	3.2	0	0	0	0	0.2	3.4	65.4	75.6	27.2	4.2	2	0.6	0	0.1	0	0	0	0	0.1	0.2	2.4
1999-03-30	0	0	0	0	0	1.6	0	0	0.6	0	0	0.1	0.3	0	0	0.8	0.1	1.2	0	0	0.5	0.3	0.2	0.2	0.3	0.5	0	2.5	0	0	0	0	0	0	29.8	18.2	15.5	0	4.6	14.4	0	3.9	3	0.8	0	0	0	0	0.3
1999-03-31	0	0	0	0	0	26.1	0	0	1.7	0	0	0	0	0	0	0	0	0	0	0	0	0	0	0	0	0	0	1.2	0	0	0	0	0.1	0	25.7	11.6	0.4	0	27.7	23.6	0	0	0	2.1	0	0	0	0	0
1999-04-01	0	0	0	0	0.9	6.4	0	0	1	0	25.9	0	4.2	0.3	0	1.5	0	4.6	8.5	0	22.5	6.2	14.1	14.1	4.2	7.6	0.5	0	2.2	5.9	6.4	3.9	5.3	1.4	8.8	4.8	0	0.3	9.5	13.9	5.6	0	0	0.1	0	0	0	0	6.2
1999-04-02	0	0	0	0	0.1	40.9	0	4	0	0	2	3.8	0.3	0	23.9	0.2	3.8	0.6	3.6	20.6	8.7	3.8	2.6	2.6	0.3	1.4	0	6.5	6.2	2.9	0	0.5	7	0.2	4.2	17.9	0	1.1	15	7.1	13.9	2.5	2.6	24.4	0	0	23.9	20.6	3.8
1999-04-03	1.2	0.5	0.9	0	3	2.1	0	6.5	19	0	0.2	4.2	0	0.6	5	0.5	4.2	10.6	6.7	8.4	18.9	7.5	6.5	6.5	0	0	3.8	0.1	0	3.9	3.7	0	5.5	1.7	0.1	2.9	7.4	5.6	44.9	53.4	15.2	0.2	0.9	23.1	0	0	5	8.4	7.5
1999-04-04	0.9	0.1	1.1	0	0.7	4.5	0.4	0	7.8	3.5	4.1	0	0.2	1.7	0.1	0.3	0	0	0.7	0.1	1	0.1	0.2	0.2	0.2	0.2	2.7	6.2	15.2	6.5	9.1	1.7	37.8	11.8	2.5	33.6	53.5	33.1	40	21.6	3.6	0	0	0	0	0	0.1	0.1	0.1
1999-04-05	0	0.2	0	0	2.2	27.3	0	0.1	2.9	0	0.3	0.1	0.1	0.8	0.1	0	0.1	0.2	0.7	0	1.6	0	0.1	0.1	0.1	0.3	3.7	0.5	16.8	10.9	19.5	1.9	0.2	17.5	0	10.5	7.1	4.4	4.7	0	0.4	0	0	0	0	0	0.1	0	0
1999-04-06	5	0	0	0.5	0	7.1	0	0.6	1.5	0	4.3	1	0	2.7	0	0	1	0.1	0	0	3.6	0	0.3	0.3	0	2.3	1.9	0.9	0.6	3.2	0.5	4.5	0.1	3.9	0	5.3	10.1	28.3	1.6	0.1	0.4	0	0	0	0	0	0	0	0
1999-04-07	4.2	0	0	0	0	0.4	0	0.1	0	0	0	0.2	0	0.1	0	0	0.2	0	0	0	0	0	0	0	0	0	0	0.2	0	0	0	1.2	1.9	0	0	24.7	0.2	0.2	3	0.1	0	0	0	0	0	0	0	0	0
1999-04-08	0	0	0	0	0	2.7	0.3	0	0	0	0	0	0	0	0	0	0	0	0	0	0	5	2.5	2.5	0	0	20.3	0	4.2	0	1.1	0.4	0.2	0	0	65.4	12.7	1.3	28	27.2	29	0	0	0	0	0	0	0	5
1999-04-09	0	0	0	0	0	0.5	14.5	0	0	0	25.7	0	0	0	0	0	0	0	0	0	0	0	0	0	0	0	41.2	43.7	0	2.3	5.3	24.2	16.4	0	27.4	48.1	29.9	16.3	2.4	0	0	0	0	0	0	0	0	0	0
1999-04-10	0	0	0	0	2.1	4	1.1	1.7	0	0	0.4	10.8	19.2	2.3	0	28.8	10.8	3.2	0	0	14.9	23.5	19.2	19.2	19.2	5.8	0	0	0	0.1	0.4	2.8	0.3	0	1.2	1.8	0.9	0	0	0.7	12.8	0	0	0	0	0	0	0	23.5
1999-04-11	0	0	0	0	0	35.4	0	0	0.3	0	0.2	0	0	0	0	0	0	0	0.3	0	0.1	0	0	0	0	0	0	0	0	0	0	0	1.1	0	3	15	7.5	2.4	0.8	13.9	0	0	0	0.1	0	0	0	0	0
1999-04-12	0	0	0	0	0	3.5	0	0.2	0	0	0	0.4	0	0	0	0	0.4	0	0	0	0	0	0	0	0	0	0	0	0.3	14.2	5.1	0	0	0	0	0	0	0	2.6	11.9	6.1	0	0	0	0	0	0	0	0
1999-04-13	0	0	0	0	0	0.2	0	0	1.7	0	0	0	0	0	0	0	0	0	0	0	0	0	0	0	0	0	0	0	0	0	0	0	0	0	0.6	6.7	0.4	0	9.5	9.1	0	0	0	0	0	0	0	0	0
1999-04-14	0	0	0	0	0	0	0	0	0	0	0.5	0	0	0	0	0	0	0	0	0	0	0	0	0	0	0	0.7	0	3.1	0	0	0	34.4	0	10.1	4.5	0	0	3	4.2	0	0	0	0	0	0	0	0	0
1999-04-15	0	0	0	0	0	0	0	0	0	0	0	0	0	0	0	0	0	0	0	0	0	0	0	0	0	0	0	0	3.3	0	0	0	1.4	2.5	0	0	0	0	5.5	1.5	0	0	0	0	0	0	0	0	0
1999-04-16	0	0	0	0	0	0	0	0	0	0	0	0	0	0	0	0	0	0	0	0	0	0	0	0	0	0.6	0	0	0	0	0	0	0	0	0	0	0	0	0	1.4	0	0	0	0	0	0	0	0	0
1999-04-17	0	0	0	0	0	4.3	0	0	0	0	0	0	0	5.6	0	0	0	0	0	0	0	0	0	0	0	0	0	0	0	0	0	2.9	0	0	0	0	0	0	0	0	0	0	0.2	0	0	0	0	0	0
1999-04-18	0	0	0	0	0	3.8	0	0	0	0	0.1	0	0.5	2.5	0	0.2	0	0.2	0	0	0	0	0	0	0.5	1.2	0	0	0	0.2	0.9	0	0	0	0	0	0	0	0	0	0	0	0.9	0	0	0	0	0	0
1999-04-19	0	0	0	0	0	0.9	0	0	0	0	0	0	0	0.8	0	0	0	0	0	0	0	0	0	0	0	0	0	0	0	0	0	0	0	0	0	2.8	0	0	0	0	0	0	0.1	0	0	0	0	0	0
1999-04-20	0	0	0	0	0	0	0	0	0	0	0	0	0	0	0	0	0	0	0	0	0	0	0	0	0	0	0	0	0	0	0	0	0	0	0.2	0.6	1	0	0	0	0	0	0	0.2	0	0	0	0	0
1999-04-21	0	0	0	0	0	0	0	0	0	0	0.2	0	0	1.8	0	0	0	0	0	0	0	0	0	0	0	0	0	2.3	0	0	0	0.4	0	0	0	0	0	0	0	0	0	0	0	0.3	0	0	0	0	0
1999-04-22	0	0	0	0	0	0	0	0	0	0	0	0	0	0	0	0	0	0	0	0	0	0	0	0	0	0	0	0	0	0	0	0	0	0	0	0	0	0	0	0	0	0	0	0	0	0	0	0	0
1999-04-23	0	0	0	0	0	0	0	0	0	0	0	0	0	0	0	0	0	0	0	0	0	0	0	0	0	0	0	0	0	0	0	0	0	0	0	0	0	0	0	0	0	0	0	0	0	0	0	0	0
1999-04-24	0	0	0	0	0.1	0	0	0	0	0.1	0	0	0	0	0	0	0	0	0	0	0	0	0	0	0	0	0	0	0	0	0	0	0	0	0	0	2.3	0	0	0	0	0	0	0	0	0	0	0	0
1999-04-25	0	0	0	0	4.9	1	0	0.9	0.3	11.9	0.1	0.6	7.2	0	0.6	6.1	0.6	3.8	0.1	0.1	7.6	5.3	11.5	11.5	7.2	2.2	0	0	0.4	0	0.1	0	0	0	0	0	0.1	0	1.6	0	0	0	0	0	0	0	0.6	0.1	5.3
1999-04-26	0	0	0	0	6.2	22	0.5	1.3	5.8	0	0.1	2.1	0	0	1.3	0	2.1	0.1	1.4	1	6.8	1.9	0.4	0.4	0	0	0	0	0.5	0.3	0	0	0	0	0	0	0	0	0.1	0	0.5	0	0	0	0	0	1.3	1	1.9
1999-04-27	0	0	0	0	4.9	25.6	0	0	15.2	0	0	0	0	0	7.1	0	0	0	18.3	0	0.3	0	0	0	0	0	0	0	0	0.7	1	0.2	1.4	0	0	2	0	0	0	0	0.6	0	0	0	0	0	7.1	0	0
1999-04-28	0	0	0	0	0	30.4	0	0	0	0	0	0	0	0	0	0	0	0	0	0	0.7	0	0	0	0	0	0	0	0	0	5.1	0	2	0	0	0	0	0	0	0	0	0	0	0	0	0	0	0	0
1999-04-29	0	0	0	0	0	9.1	0	0	0	0	0	0	0	0	0	0	0	0	0.1	0	0	0	0	0	0	0	0	0	0	0	0	0	0	0	0	0	3.7	7.8	0	0	0	0	0	0	0	0	0	0	0
1999-04-30	0	0	0	0	0	0	0	0	0	0	0	0	0	0	0	0	0	0	0.1	0	0	0	0	0	0	0.1	0	0	0	0.5	0	0	0	0	0	8.1	3.6	0	0.1	0	0	0	0	0	0	0	0	0	0
1999-05-01	0	0	0	0	3.7	0.8	0	0	0	0	0.2	0	0	0	0	0	0	0.2	0	0	0	0	0	0	0	0.3	0	0.1	0.1	0.5	0	0	0.1	0	0.4	0	0	0	0.1	0	0	0	0	0	0	0	0	0	0
1999-05-02	0	0	0	0	0	0	0	0	0	0	0	0	0	0	0	0	0	0	0	0	0	0	0	0	0	0	0	0	0	0	0	0	1.1	0	0.7	0	1.6	0	2.1	0.8	0.1	0	0	0	0	0	0	0	0
1999-05-03	0	0	0	0	0	9.2	0	0	0	0	0.4	0	0	4.3	0	0	0	0	0	0	0	0	0	0	0	0	2.4	3.6	0	0	0	0	0	0	0	0	0.8	0	0	0	0	0	0	0	0	0	0	0	0
1999-05-04	0	0	0	0	0	11.7	0	0	0	0	0	0	0	2.6	0	0	0	0	0	0	0	0	0	0	0	0	0.8	0.5	0	0	0	0	0.3	0	0	0	0	0	0	0	0	0	0	0	0	0	0	0	0
1999-05-05	0	0	0	0	0.7	10.6	0	0	0	0	0	0	0	0	0	0	0	0	0	0	0	0	0	0	0	0	0	4.6	0	0	0	0	6.9	0	1.4	0	0	0	5	7.8	0	0	0	0	0	0	0	0	0
1999-05-06	0	0	0	0	0.3	1.3	0	0	0	0	0	0	0	0	0	0	0	0	0	0	0	0	0	0	0	0	0	0	0	0	0	0.1	0	0	0	0	0	0	16.2	0	0	1	0	0	0	0	0	0	0
1999-05-07	0	0	0	0	0	0	0	0	0	0	0	0	0	0	0	0	0	0	0	0	0	0	0	0	0	0	0	0	0	0	0	0	0	0	1.7	0	0	0	0	0	0	4.6	0	0	0	0	0	0	0
1999-05-08	0	0	0	0	0	0.1	0	0	0	0	0	0	0	0	0	0	0	0	0	0	0	0	0	0	0	0	0	0	0	0	0	0	0	0	0	0.3	0	0	0	0	0	0	0	0	0	0	0	0	0
1999-05-09	0	0	0	0	0.2	0	0	0	0	0	0	0	0	0	0	0	0	0	0	0	0	0	0	0	0	0	1.3	3.1	0	0	0	0.1	0	0	0	0	0	0	0	0	0	0	0	0	0	0	0	0	0
1999-05-10	0	0	0	0	0	0	0	0	0	0	1.7	0	0	3	0	0	0	6.7	0	0	0	0	0	0	0	0	0.2	0	3.6	0	0	0	0	0	0	0	0	0	0	0.1	0	0	0	0	0	0	0	0	0
1999-05-11	0	0	0	0	0	0	0	0	0	0	0	0	0	2.1	0	0	0	0	0	0	0	0	0	0	0	0	2.4	0	0	0	0	15.9	0	0	0.2	0	0	0	0	0	0	0	0	0	0	0	0	0	0
1999-05-12	0	0	0	0	0	0	0	0	0	0	0.1	0	0	0	0	0	0	0	0	0	0	0	0	0	0	0	6.2	7	7.1	0	0	5.6	0	0	0.2	0	0.4	0.6	0	0	0	0	0	0	0.1	0	0	0	0
1999-05-13	0	0	0	0	0	1.4	0	0	0	0	0	0	0	0.5	0	0	0	0	0	0	0	0	0	0	0	0	0	0.8	0	0	0	8.8	0	0	0	0	0	0	0	0	0	0	0	0	0	0	0	0	0
1999-05-14	0	0	0	0	0	0.4	0	0	0	0	0	0	0	0	0	0	0	0	0	0	0	0	0	0	0	0	0	1.6	0	0	0	0	0	0	0	0	0	0	0	0	0	0	0	0	0	0	0	0	0
1999-05-15	0	0	0	0	0	6.6	0	0	0	0	0	0	0	0	0	0	0	0	0	0	0	0	0	0	0	0	0	0.8	0	0	0	0	0	0	0	0	0	0	0	0	0	0	0	0	0	0	0	0	0
1999-05-16	0	0	0	0	0	5.8	0	0	0	0	0	0	0	0	0	0	0	0	0	0	0	0	0	0	0	0	0	0	0	0	0	0	0	0	0	0	0	0	0	0	0	0	0	0	0	0	0	0	0
1999-05-17	0	0	0	0	0.4	0.6	0	0	0.4	0	0	0.2	0	0.2	0	0	0.2	0	0.3	0	0.7	0.8	0.3	0.3	0	0.4	0	0	0	0	0	0	0	0	0	0	0	0	0	0	0	0	0	0.2	0	0	0	0	0.8
1999-05-18	0	0	0	0	0	0	0	0	0	0	0	0	0	0	0	0	0	0	0	0	0	0	0	0	0	0	0	0	0	0	0	0	0	0	0	0	0	0	0	0	0	0	0	0.1	0	0	0	0	0
1999-05-19	0	0	0	0	0	7.6	0	0	0	0	0	0	0	0	0	0	0	0	0	0	0	0	0	0	0	0	3.2	22.6	0	0	0	0	0	0	0	0	0	0	0	0	0	2.9	0	0	0	0	0	0	0
1999-05-20	0	0	0	0	0	1.5	0	0	0	0	0	0	0	0	0	0	0	0	0	0	0	0	0	0	0	0	4.9	10.1	0	0	0	0	0	0	0	0	6	0	6.6	0	0	0	0	0	0	0	0	0	0
1999-05-21	0	0	0	0	0	0.3	0	0	0	0	0	0	0	7.2	0	0	0	0	0	0	0	0	0	0	0	0	0	19.9	0	0	0	12.7	38.1	0	0	0	5.9	0	28.1	0	0	0	0	0.7	0.1	0.1	0	0	0
1999-05-22	0	0	0	0	0	0	0	0	0	0	0	0	0	3.1	0	0	0	0	0	0	0	0	0	0	0	0	0	0	0	0	0	0	0	0	0	0	0	0	2.7	0	0	0	0	0.1	0	0	0	0	0
1999-05-23	0	0	0	0	0	0	0	0	0	0	0	0	0	0	0	0	0	0	0	0	0	0	0	0	0	0	0	0	0	0	0	0	0	0	0	0	0	0	0	0	0	0	0	0	0	0	0	0	0
1999-05-24	0	0	0	0	0	0	0	0	0	0	0	0	0	0	0	0	0	0	0	0	0	0	0	0	0	0	0	0	0	0	0	0	0	0	0	0	0	0	0	0	0	0	0	0	0	0	0	0	0
1999-05-25	0	0	0	0	0	0	0	0	0	0	0	0	0	7.9	0	0	0	3.5	0	0	0	0	0	0	0	0	0	0	0	0	0	0	0	0	0	0	0	0	0	0	0	0	0	0	0	0	0	0	0
1999-05-26	0	0	0	0	0	0	0	0	0	0	1.3	0	0	10.3	0	0	0	5.8	0	0	0	0	0	0	0	0	1.8	0	0	0	0	0	0	0	0	0	0	0	0	0	0	0	0	0	0	0	0	0	0
1999-05-27	0	0	0	0	0	14.9	0	0	0	0	0.9	0	0.2	4	0	0	0	0	0	0	0	0	0	0	0.2	0.8	1.2	0	0	0	0	12.5	0	0	0	0	0	0	4.4	0	0	0	0	0	0	0	0	0	0
1999-05-28	0	0	0	0	0	9.9	0	0	0	0	0	0	0	0.5	0	0	0	0	0	0	3.5	0	0	0	0	0	5.3	0	0	0	0	24.8	0	0	0	0	0	0	2.2	0	0	0	0	0	0	0	0	0	0
1999-05-29	0	0	0	0	0.1	6.4	0	0	0	0	0	0	0	0	0	0	0	0	0	0	0	0	0	0	0	0	1.2	0	0	0	0	14.6	0	0	0	0	0	0	0	0	0	0	0	0	0	0	0	0	0
1999-05-30	0	0	0	0	0	0	0	0	0	0	0.2	0	0	0	0	0	0	0	0	0	0	0	0	0	0	0	4.5	0.4	0	0	0	10.7	0	0	0	0	0	0	0	0	0	0	0	0	0	0	0	0	0
1999-05-31	0	0	0.1	0	0	0	0	0	0	0.4	2.3	0	0.4	0.7	0	0.5	0	1	0	0	0	0	0	0	0.4	0	0.2	0	0	0	0	0	0	0	0	0	0	0	0	0	0	0	0	0	0	0	0	0	0
1999-06-01	0.2	0.1	0.4	0	0	0	0.1	0	0	1.1	10.9	0	2.3	0.7	0	4.4	0	13.4	0	0	0	0	1.7	1.7	2.3	1.5	0	0	0.8	0	0	0	0	0	0	0	0	0	0	0	0	0	0	0	0	0	0	0	0
1999-06-02	0	0	0	0	0	0	0	0	0	0	0	0	0	0	0	0	0	0	0	0	0	0	0	0	0	0	0	0	0	0	0	0	0	0	0	0	0	0	0	0	0	0	0	0	0	0	0	0	0
1999-06-03	0	0	0	0	0	0	0	0	0	0	0	0	0	0	0	0	0	0	0	0	0	0	0	0	0	0	0	0	0	0	0	0	0.1	0	0	0	0.1	0	0	0	0	0	0	0	0	0	0	0	0
1999-06-04	0	0	0	0	0	0	0	0	0	0	0.4	0	0	1.3	0	0	0	0	0	0	1	0	0	0	0	0.1	14	0	0.1	0	0	0	0	0	0.3	0	0	0	0	0	0	0	0	0	0	0	0	0	0
1999-06-05	0	0.6	0	0	0	1.5	0	0	0	0	0	0	0	0	0	0	0	0	0	0	0.3	0	0	0	0	0	5.3	1.1	0	0	0	0	0	0	0	0	0	0	0	0	0	0	0	0	0	0	0	0	0
1999-06-06	0	0.2	0	0	0	3.8	0	0	0	0	0	0	0	0	0	0	0	0	0	0	3.2	0	0	0	0	0	1.2	0	0	0	0	14.3	0	0	0	0	0	0	0	0	0	0	0	0	0	0	0	0	0
1999-06-07	0	0	0	0	0	0.7	0	0	0	0	0.3	0	0	0	0	0	0	0	0	0	0	0	0	0	0	0	4.9	0	0	0	0	0	0	0.2	0	0	0	0	0	0	0	0	0	0	0.1	0	0	0	0
1999-06-08	0	0	0	0	0.8	4.8	0	0	0	0	0	0	0	0	0	0	0	0	0	0	0	0	0	0	0	0	0	0	0	0	0	0	0	0	0	0	0	0	0	0	0	0	0	0	0	0	0	0	0
1999-06-09	0	0	0	0	1.4	1.8	0	0	0	0	0	0	0	0.1	0	0	0	0	0	0	0.1	0	0	0	0	0	0	0	0	0	0	0	0	0	0	0	0	0	0	0	0	0	0	0	0	0	0	0	0
1999-06-10	0	0	0	0	0	0	0	0	0	0	0	0.2	0	0.2	0	0.1	0.2	0	0	0	0	0.1	0.1	0.1	0	0	0	0	0	0	0	0	0	0	0	0	0	0	0	0	0	0	0	0	0	0	0	0	0.1
1999-06-11	0	0	0	0	0	0	0	0	0	0	0	0	0	1.1	0	0	0	0	0	0	5.8	0.8	1.5	1.5	0	2.2	0	0	0	0	0	0	0	0	0	0	0	0	0	0	0	0	0	0	0	0	0	0	0.8
1999-06-12	0	0	0	0	0	4	0	0	0	0	1.1	0	0	1	0	0	0	0	0	0	0	0	0	0	0	0.2	5.9	8.4	0	0	0	0	0	0	0	0	0	0	0	0	0	0	0	0	0	0	0	0	0
1999-06-13	0	0	0	0	0.2	1.3	8.4	0	5.3	0	3.7	1.1	4.2	0	0	9	1.1	20.5	4.7	0	2.2	3.1	5	5	4.2	6.4	0	10.3	0	1.9	2.8	0	0	0.1	0	0	0	2.1	0	0	0	0	0	0	0	0	0	0	3.1
1999-06-14	0	0	0	0	0	0.1	1	0	0	0	0	14.3	1.7	0	0.5	19.5	14.3	13.1	0	0	6.1	22.1	12.4	12.4	1.7	0.3	1	0	0	0	0	0	0	0	0	0	0	0	0	0	0	0	0	0	0	0	0.5	0	22.1
1999-06-15	0	0	0	0	0	3.9	0.8	0	0	0	0	0	0	0	0	0	0	0	0	0	0	0	0	0	0	0	0	0	0	0	0	0	0	0	0	0	0	0	0	0	0	0	0	0	0	0	0	0	0
1999-06-16	0	0	0	0	0	15.1	0	0	0	0	0	0	0	0	0	0	0	0	0	0	0	0	0	0	0	0	0	0	0	0	0	0	0	0	0	0	0	0	0	0	0	0	0	0	0	0	0	0	0
1999-06-17	0	0	0	0	0	0	0	0	0	0	0	0	0	0	0	0	0	0	0	0	0	0	0	0	0	0	0	0	0	0	0	0	0	0	0	0	0	0	0	0	0	0	0	0	0	0	0	0	0
1999-06-18	0	0	0	0	0.2	0.1	0	0	0	0	0	0	0	0	0	0	0	0	0	0	0	0	0	0	0	0	0	0	0	0	0	0	0	0	0	0	0	0	0	0	0	0	0	0	0	0	0	0	0
1999-06-19	0	0	0	0	0.5	9.5	0	0	0.3	0	0	0	0	0	0.3	0	0	0	0	0	3.1	0.3	0.3	0.3	0	0.4	2.7	0	0	0	0	0	0	0	0	0	0	0	0	0	0	0	0	0	0	0	0.3	0	0.3
1999-06-20	0	0	0	0	0.5	6.4	0	0	0	0	0.2	0	0	1.2	0	0	0	0	0	0	0	0	0	0	0	0	3.2	1.4	0	0	0	1.3	0	0	0	0	0	0	0	0	0	0	0	0	0	0	0	0	0
1999-06-21	0	0	0	0.2	0	54.6	0	0	0	0	3.5	0	0.8	5.2	0	0.3	0	0	0	0	0	0	0	0	0.8	1	3.4	3.1	1.6	0	0	0	8.8	0	0.6	0	0	0	0	2.1	0	0	0	0	0	0	0	0	0
1999-06-22	0	0	0	0	0	2	0	0	0	0	1.6	0	0.9	15.5	0	0.9	0	8.5	0	0	0	0	1.4	1.4	0.9	0.4	16.3	0	0.8	0	0	18.5	0.5	0	0	12.2	0	0	0	1.3	0	0	0	0	0	0	0	0	0
1999-06-23	0.1	0	0	0	0	0.8	0	0	0	0	0.7	0	0	14.3	0	0.1	0	5.6	0	0	0	0	0	0	0	0	8.8	1.2	1	0.6	0.5	6.3	18.1	0	0	2.3	0	0	3.9	0	1	0	0	0	0	0.1	0	0	0
1999-06-24	0	0	0	0	0	0	0	0	0	0	0.1	0	0	11.7	0	0	0	0.8	0	0	1.9	0	0	0	0	0.4	16.4	0	2.7	0	0	0	0	0	0	0	0	0	6.7	0	0	0	0	0	0	0	0	0	0
1999-06-25	0	0	0	0	0	0.7	0	0	0	0	0	0	0	9.2	0	0	0	0	0	0	2.7	0	0	0	0	0	0	0	0	0	0	0	0	0	0	0	0	0	0	0	0	0.2	0	0	0	0	0	0	0
1999-06-26	0	0	0	0	0	4.8	0	0	0	0	0	0	0	0.3	0	0	0	0	0	0.2	0.4	0	0	0	0	0	2.6	0	0	0	0	0	0	0	0	0	0	0	0	0	0	0.2	0	0	0	0	0	0.2	0
1999-06-27	0	0	0	0	0	2.6	0	0	0	0	0	0	0	0	0	0	0	0	0	0	0	0	0	0	0	0	0	0	0	0	0	0	0	0	0	0	0	0	1.1	0	0	0	0	0	0	0	0	0	0
1999-06-28	0	0	0	0	0	6	0	0	0.1	0	0	0	0	3	0	0	0	0	0	0	0	0	0	0	0	0	0	0	0	0	0	0	0	0	0	8.6	0	0	0	0	0	0	0	0	0	0	0	0	0
1999-06-29	0	0	0	0	0	6.2	0	0	0	0	0	0	0	1.5	0	0	0	0	0	0	0	0	0	0	0	0	10.2	12.8	0	0	0	19	0	0	0	0	0	0	2.8	0	0	0	0	0	0	0	0	0	0
1999-06-30	0	0	0	0	0	0	0	0	0	0	0	0	0	0	0	0	0	0	0	0	0	0	0	0	0	0	6.2	6.7	0	0	0	6	0	0	0	0	0	0	0	0	0	0	0	0	0	0	0	0	0
1999-07-01	0	0	0	0	0	0	0	0	0	0	0	0	0	0	0	0	0	0	0	0	0	0	0	0	0	0	4.2	6	0	0	0	6.1	0	0	0	0	4.5	0	0	0	0	0	0	0	0	0	0	0	0
1999-07-02	0	0	0	0	0	0.7	0	0	0	0	0	0	0	0	0	0	0	0	0	0	0	0	0	0	0	0	1.5	0	0	0	0	0	0	0	0	0	0	0	0	0	0	0.1	0	0	0	0	0	0	0
1999-07-03	0	0	0	0	0	0	0	0	0	0	0	0	0	0	0	0	0	0	0	0	0	0	0	0	0	0	0	0	0	0	0	0	0	0	0	0	0	0	0	0	0	0	0	0	0	0	0	0	0
1999-07-04	0	0	0	0	0	0	0	0	0.1	0.1	0	0	0	11.4	0	0	0	7.6	0	0	0	0	0	0	0	0	0	18.4	2.4	0	0	0	0	0	0	0	0	0	0	0	0	0	0	0	0	0	0	0	0
1999-07-05	0	0	0	0	0	0	0	0	0	0	0	0	0	0	0	0	0	0	0	0	0	0	0	0	0	0	0	0	0	0	0	0	0	0	0	0	0	0	0	0	0	0	0	0	0	0	0	0	0
1999-07-06	0	0	0	0	12.7	4.8	0	0	36.9	0	0	0	0	3.4	0.6	0	0	1.2	7.6	0.1	0	0	0	0	0	0	0	0	0	0.5	0	0	0	0	0	3.3	0	0	11.4	0	1.1	0	0	0	0	0	0.6	0.1	0
1999-07-07	0	0	0	0	6.6	0	0	0	0	0	0	0	0	6.4	0	0	0	3.1	0	0.3	0	0	0	0	0	0	0	8.4	0	0	0	2.2	0	0	0	8.5	0	0	7.6	0	0	0	0	0	0.1	0	0	0.3	0
1999-07-08	0	0	0	0	0	0.9	0	0	0	0	0	0	0	0	0	0	0	0	0	0	0	0	0	0	0	0	0	0	0	0	0	0	0	0	0	0	1.7	0	0.6	0	0	0	0	0	0	0	0	0	0
1999-07-09	0	0	0	0	0	0	0	0	0	0	0	0	0	0	0	0	0	0	0	0	0	0	0	0	0	0	0	0	0	0	0	0	0	0	0	0	0	0	0	0	0	0	0	0	0	0	0	0	0
1999-07-10	0	0	0	0	0	0	0	0	0	0	0	0	0	0	0	0	0	0	0	0	0	0	0	0	0	0	0	1.5	0	0	0	0	0	0	0	0	0	0	0	0	0	0	0	0	0	0	0	0	0
1999-07-11	0	0	0	0	0.1	3.7	0	0	0	0	0	0	0	0	0	0	0	0	0	0	0	0	0	0	0	0	0	8.6	0	0	0	0	0	0	0	0	0	0	0	0	0	0	0	0	0	0	0	0	0
1999-07-12	0	0	0	0	0.1	3.7	0	0	0	0	0	0	0	0	0	0	0	0	0	0	0	0	0	0	0	0	0	0	0	0	0	0	0	0	0	0	0	0	0	0	0	0	0	0	0	0	0	0	0
1999-07-13	0	0	0	0	0	0	0	0	0	0	0	0	0	0	0	0	0	0	0	0	0	0	0	0	0	0	0	0	0	0	0	0	0	0	0	1.6	0	0	0	0	0	0	0	0	0	0	0	0	0
1999-07-14	0	0	0	0	0	10.7	0	0	0	0	0	0	0	0	0	0	0	0	0	0	0	0	0	0	0	0	0	0	0	0	0	0	0	0	0	0	0	0	0	0	0	0	0	0	0.8	0.1	0	0	0
1999-07-15	0	0	0	0	0	13.5	0	0	0	0	2.1	0	0	3.5	0	0	0	0	0	0	0	0	0	0	0	0	0	0	0	0	0	22.3	0	0	0	0	0	0	0	0	0	0.1	0	0	0	0	0	0	0
1999-07-16	0	0	0	0	0	4.7	0	0	0	0	0	0	0	0	0	0	0	0	0	0	0	0	0	0	0	0	3.6	25.7	0	0	0	2.8	0	0	0	7.3	1.2	0	6.4	0	0	0.1	0	0	0	0	0	0	0
1999-07-17	0	0	0	0	0	3.9	0	0	0	0	2.3	0	0	2	0	0	0	0	0	0	0	0	0	0	0	0	7.7	3.7	0	0	0	1.1	0	0	0	0	0	0	6.1	0	0	0	0	0	0	0	0	0	0
1999-07-18	0	0	0	0	2.9	2.3	0.1	0.7	4.3	0	0.7	0.6	0.1	2	0.2	0	0.6	0	0.8	2.3	0.4	0	0.3	0.3	0.1	0.1	1.8	4.1	0.1	0	0	0	0	1.9	0	0	0	0	0	0	0	0.1	0	0	0	0	0.2	2.3	0
1999-07-19	0	0	0	0	1.4	0	0	0	0	0	0.2	0	0.1	0.6	0	0	0	0	0	0	0	0	0	0	0.1	0.1	8.6	10.2	0	0.2	0	16.6	0	0.3	0	0	0	0	0	0	0	0	0	0	0	0	0	0	0
1999-07-20	0	0	0	0	0.3	0	0	0	0	0	0	0	0	0	0	0	0	0	0	0	0	0	0	0	0	0	0.1	0	0	0.1	0	0	0	0	0	3.1	0	0	0	0	0	0.1	0	0	0	0	0	0	0
1999-07-21	0	0	0	0	0	0	0	0	0	0	0	0	0	0	0	0	0	0	0	0	0	0	0	0	0	0	6.7	0	0	0	0	0	0	0	0	2.8	0	0	0	0	0	0	0	0	0	0	0	0	0
1999-07-22	0	0	0	0	0	3.6	0	0	0	0	0	0	0	0	0	0	0	0	0	0	0	0	0	0	0	0	0	12.3	0	0	0	5.5	0	0	0	3.4	0	0	0	0	0	0.1	0	0	0	0	0	0	0
1999-07-23	0	0	0	0	0	28.4	0	0.7	0	0	2.9	1.6	0	14.1	0	0.2	1.6	0.7	0	0	0	0	4.2	4.2	0	0.8	0	8	0	0	0	3.9	0	0	0	1.9	0.7	0	0	0	0	0	0	0	0	0	0	0	0
1999-07-24	0	0	0	0	0	0	0	0	0	0	0	0	1.6	17.3	0	0.1	0	4.8	0	0	0	0	0	0	1.6	1.1	0	0	0	0	0	0	0	0	0	0	7.9	0	9.4	0	0	0	0	0	0	0	0	0	0
1999-07-25	0	0	0	0	0	0	0	0	0	0	0	0	0	0	0	0	0	0	0	0	0	0	0	0	0	0	5.9	0	0	0	0	15.2	0	0	0	3.5	0.2	0	1.1	0	0	0	0	0	0	0	0	0	0
1999-07-26	0	0	0	0	0	0	0	0	0	0	0	0	0	0	0	0	0	0	0	0	0	0	0	0	0	0	0	0.7	0.2	0	0.4	0	0	0	0	29	9.3	1.4	0	0	0	0	0	0	0	0	0	0	0
1999-07-27	0	0	0	0	0	0	0	0	0	0	0	0	0	0	0	0	0	0	0	0	0	0	0	0	0	0	0	0	0	0	0	0	0	0	0	0	0	0	0	0	0	0	0	0	0	0	0	0	0
1999-07-28	0	0	0	0	0	0	0	0	0	0	0	0	0	0	0	0	0	0	0	0	0	0	0	0	0	0	0.1	0	0	0	0	0	0	0	0	0	0	1	0.2	0	0	0	0	0	0	0	0	0	0
1999-07-29	0	0	0	0	0	0	0	0	0	0	0.6	0	0	14.3	0	0	0	0	0	0	0	0	0	0	0	0	0.4	0	0	0	0	0	0	0	0	0	0	0	0.1	0	0	0	0	0	0	0	0	0	0
1999-07-30	0	0	0	0	0	5.9	0	0	0	0	0	0	0	1.4	0	0	0	0	0	0	0	0	0	0	0	0	8	0	0	0	0	0	0	0	0	0	0	0	3.2	0	0	0	0	0	0	0	0	0	0
1999-07-31	0	0	0	0	0	0	0	0	0	0	0	0	0	0	0	0	0	0	0	0	0	0	0	0	0	0	4.1	0	0	0	0	0	0	0	0	0	0.3	0	0.4	0	0	0	0	0	0	0	0	0	0
1999-08-01	0	0	0	0	0	12.3	0	0	0	0	0	0	0	0	0	0	0	0	0	0	0	0	0	0	0	0	0.4	0.7	0	0	0	8.9	0	0	0	0	1	0	2.8	0	0	0	0	0	0	0	0	0	0
1999-08-02	0	0	0	0	0	3.6	0	0	0	0	0	0	0	0	0	0	0	0	0	0	0	0	0	0	0	0	0	0	0	0	0	2.8	0	0	0	4.5	0.1	0	0	0	0	0	0	0	0	0	0	0	0
1999-08-03	0	0	0	0	0	0.4	0	0	0.4	0	0	0	0.8	4.2	0	0	0	0	0.2	0	0	0	0	0	0.8	1.2	0	0	0	0	0	7.7	0	0	0	0	0	0	0	0	0	0	0	0	0	0	0	0	0
1999-08-04	0	0	0	0	0	0.1	1.1	0.2	0	0	7.8	0	0.4	1.9	0	2.2	0	0	0	0	0	0	0	0	0.4	0	0	0	0	0.2	0	2.1	0	0	0	0	0	0	0	0	1.6	0	0	0	0	0	0	0	0
1999-08-05	0	0	0	0	8.9	0.1	4.9	0.1	0	0	30	0	3	0	0	13.1	0	0	0	0	0	0	2.6	2.6	3	4.3	0	0	0	0.2	0	0	0	0	0	0	0	0	0	0	1.5	0	0	0	0	0	0	0	0
1999-08-06	0	0	0	0	0.8	0	0.1	0	0	0	1.5	0	0.1	0	0	0.5	0	0	0	0	0	0	0.3	0.3	0.1	0.3	0	0	0	0	0	0	0	0	0	0	0	0	0	0	0	0	0	0	0	0	0	0	0
1999-08-07	0	0	0	0	0	2	0	0	0	0	0	0	0	0	0	0	0	0	0	0	0	0	0	0	0	0	4.3	0	0	0	0	0	0	0	0	0	0	0	3	0	0	0.1	0	0	0	0	0	0	0
1999-08-08	0	0	0	0	0	0	0	0	0	0	5.1	0	0	5.5	0	0	0	0	0	0	0	0	0	0	0	0	2.3	0.5	0	0	0	6	0	0	0	0	0	0	0	0	0	0.1	0	0	0	0	0	0	0
1999-08-09	0	0	0	0	0	1.9	0	0	0	0	0	0	0	0.6	0	0	0	0	0	0	0	0	0	0	0	0	1.1	7.5	0	0	0	2.5	0	0	0.3	0	0	0	0.9	0	0	0.1	0	0	0	0	0	0	0
1999-08-10	0	0	0	0	0	0	0	0	0	0	0	0	0	0	0	0	0	0	0	0	5.6	0	0	0	0	0	3.4	0.1	0	0.2	0	12.3	0	0	0	0	0	0	0.7	0	0	0	0	0	0	0	0	0	0
1999-08-11	0	0	0	0	0	0	0	0	0	0	0	0	0	0	0	0	0	0	0	0	0	0	0	0	0	0	0	0	0	0	0	0	0	0	0	0	0	0	0	0	0.3	0	0	0	0	0	0	0	0
1999-08-12	0	0	0	0	0	0	0	0	0	0	0	0	0	0	0	0	0	0	0	0	0	0	0	0	0	0	7.8	0	0	0	0	0	0	0	0	0	0	0	0	0	0	0.1	0	0	0	0	0	0	0
1999-08-13	0	0	0	0	0	0	0	0	0	0	0	0	0	0	0	0	0	0	0	0	0	0	0	0	0	0	0.9	0	0	0	0	0	0	0	0	0	0	0	0	0	0	0.1	0	0	0	0	0	0	0
1999-08-14	0	0	0	0	0	0	0	0	0	0	0	0	0	5.1	0	0	0	0	0	0	0	0	0	0	0	0	2	0	1	0	0	0	0	0	0.1	0	0	0.1	0	0	0	0.4	0	0	0	0	0	0	0
1999-08-15	0	0	0	0	0	0	0	0	0	0	0.4	0	0	11.4	0	0	0	1.5	0	0	0	0	0	0	0	0	0	1.5	0.1	0.5	0.4	0	0	0	1.8	0	0.2	0	0	0.1	0.8	0.5	0	0.1	0	0	0	0	0
1999-08-16	0	0	0	0	0	0.1	0	0	0	0	0	0	0.2	4.6	0	0.1	0	0.3	0	0	0	0	0	0	0.2	0.4	4.1	0	0	0.3	0	0.9	0	0	0.4	0	0	0	0.1	0.2	0	0	0	0.1	0	0	0	0	0
1999-08-17	0	0	0	0	5.9	0.2	0.4	0.6	1.5	2.4	0	1	1.9	13.4	0.1	1.3	1	1	1.2	0.2	0.6	1.1	4.8	4.8	1.9	2.5	0.6	1.9	0.1	0	0	1.4	0	0	0	0	0	0	0	0	0	0.1	0	0	0	0	0.1	0.2	1.1
1999-08-18	0	0	0	0	3.4	0.3	0	0	0	0	0	0	0.2	0	0	0.3	0	1.3	0	0	0	0	0	0	0.2	0	0.5	0	0	0	0	0.2	0	0	0	0	0	0	0	0	0.4	0	0	0	0	0	0	0	0
1999-08-19	0	0	0	0	10.6	0	0	0	0	2.5	0	0	1.6	0	0.2	0.4	0	0.2	0	3.7	0	1.2	0	0	1.6	1.1	1.9	0	0	0	0	1.3	0	0	0	0	0	0	0	0	0	0	0	0	0	0	0.2	3.7	1.2
1999-08-20	0	0	0	0	3.6	0.7	0	0	0	0.1	0	0	0.2	0	0	0.1	0	0	0	0.2	0	0.1	0	0	0.2	0	2.2	0	0	0	0	0	0	0	0	0	0	0	0	0	0	0	0	0	0	0	0	0.2	0.1
1999-08-21	0	0	0	0	0	0	0	0	0	0	0	0	0	0	0	0	0	0	0	0	0	0	0	0	0	0	0	0	0	0	0	0	0	0	0	0	0	0	0	0	0	0	0	0	0	0	0	0	0
1999-08-22	0	0	0	0	0	0	0	0	0	0	0	0	0	0	0	0	0	0	0	0	0	0	0	0	0	0	0	0	0	0	0	0	0	0	0	0	0	0	0	0	0	0	0.1	0	0	0	0	0	0
1999-08-23	0	0.3	0	0	0	0.3	0	0	0	0.1	0	0	0	0.3	0	0	0	0	0	0	0	0	0	0	0	0.1	3.1	1.1	0	0	0	0.3	0	0	1.3	0	0	0	1.2	0	0	0	0.2	0	0	0	0	0	0
1999-08-24	0	0	0	0	0	1.4	0	0	0	0	0	0	0	0	0	0	0	0	0	0	0.6	0	0	0	0	0	0.7	0.5	0	0	0	0.4	0	0	0	0	0.3	0	2	0	0.1	0	0	0	0	0	0	0	0
1999-08-25	0	0	0	0.8	0	1.6	0	0	0	0	0	0	0	0	0	0	0	0	0	0	0	0	0	0	0	0	0	0	0	0	0	0.3	0	0	0	0	0.1	0	0.1	0	0	0	0	0	0	0	0	0	0
1999-08-26	0	0	0	0	0	0	0	0	0	0	0	0	0	0	0	0	0	0	0	0	0	0	0	0	0	0	1.3	0.1	0	0	0	2.2	0	0	0	0	0	0	0.3	0	0	0.1	0.2	0	0	0	0	0	0
1999-08-27	0	0	0	0	0	0	0	0	0	0	0	0	0	0	0	0	0	0	0	0	0	0	0.2	0.2	0	0	0.4	0	0	0	0	0.9	0	0	0.1	0	0.9	0	5.7	0	0	0	0	0	0	0	0	0	0
1999-08-28	0	0	0	0	0	0	0	0	0	0	0	0	0	0	0	0	0	0	0	0	0	0	0	0	0	0	4.8	0	0	0	0	0	0	0	0	0	1.1	0	1.6	0	0	0	0	0	0	0	0	0	0
1999-08-29	0	0	0	0	0	0	0	0	0	0	0	0	0	0	0	0	0	0	0	0	0	0	0	0	0	0	0	0	0	0	0	0	0	0	0	0	0	0	0	0.1	0	0	0	0	0	0	0	0	0
1999-08-30	0	0	0	0	0	0.4	0	0	0	0	0	0	0	0	0	0	0	0	0	0	0	0	0	0	0	0	0	0	0	0	0	0	0	0	0.1	0	0	0	0	0	0	0	0	0	0	0	0	0	0
1999-08-31	0	0	0	0	0	0	0	0	0	0	0	0	0	0	0	0	0	0	0	0	0	0	0	0	0	0	2.5	0	0	0	0	0	0	0	0	0	0	0	3	0	0	0	0	0	0	0	0	0	0
1999-09-01	0	0	0	0	0	0.2	0	0	0	0	0	0	0	0	0	0	0	0	0	0	0	0	0	0	0	0	3.1	0	0	0	0	0	0	0	0	0	0	0	0.2	0	0	0	0	0	0	0	0	0	0
1999-09-02	0	0	0	0	0	1.6	0	0	0	0	0	0	0	0	0	0	0	0	0	0	0	0	0	0	0	0	3.2	28.3	0	0	0	0	0	0	0	0	0	0.1	2.1	0	0	0	0	0	0	0	0	0	0
1999-09-03	0	0	0	0	0	0	0	0	0	0	0	0	0	0	0	0	0	0	0	0	0	0	0	0	0	0	1.1	0	0	0	0	2.8	0	0	0.1	0	0	0	2.2	0	0	0	0	0	0	0	0	0	0
1999-09-04	0	0	0	0	0	0	0	0	0	0	0	0	0	0	0	0	0	0	0	0	0	0	0	0	0	0	0	0	0	0	0	0.3	0	0	0	0	0	0	0	0	0	0	0	0	0	0	0	0	0
1999-09-05	0	0	0	0	0	0	0	0	0	0	0	0	0	0	0	0	0	0	0	0	0	0	0	0	0	0	0.1	0	0	0	0.1	0	0	0	0	0	0	0	0	0	0	0	0	0	0	0	0	0	0
1999-09-06	0	0.4	0	0.2	0	0	0	0	0.3	0	0	0	0	0	0	0	0	0	0	0	0.3	0	0	0	0	0	0.1	0.3	0	0.1	0.1	0	0	0	0	0	0	0	0	0	0	0	0	0	0.2	0	0	0	0
1999-09-07	0	0.4	0	0.4	0	0	0	0	0	0	0	0	0	0.1	0	0	0	0	0	0	0	0	0	0	0	0	1.8	0.2	0	0	0	0	0	0	0	0	0	0	0	0	0	0	0	0	0.1	0	0	0	0
1999-09-08	0	0.5	0.1	0.1	0	2.7	0	0.7	0	0	0.1	2.2	0.1	2.2	0.1	0.1	2.2	0.1	0	0.2	0	0.6	2.5	2.5	0.1	1.1	2.1	1.3	0	0	0	0.9	0.6	0	0	0	0	0	0	0	0	0	0	0	0	0	0.1	0.2	0.6
1999-09-09	0	0.1	0	0	0	0	0	0	0	0	0	0	0	0	0	0	0	0.1	0	0	0.3	0	0	0	0	0	0.7	0	0	0	0	0	0	0	0	0	0	0	0	0	0	0	0	0	0	0	0	0	0
1999-09-10	0	0	0	0	0	0.2	0	0	0	0	0	0	0.1	0.8	0	0.1	0	0	0	0	0	0	0.2	0.2	0.1	0.4	0	0	0	0	0	0	0	0	0	0	0	0	4.4	6.7	0	0	0.2	0	0	0.2	0	0	0
1999-09-11	0	0	0	0.1	0	1.6	0	0	0	0.1	0	0.1	0	1.1	0	0	0.1	0	0	0	2.2	0.1	0.1	0.1	0	0.1	2.8	2.1	0	0.4	0	0.8	0	5.3	0	0	0	0	0	0.4	0.8	0	0.6	0	0	0.1	0	0	0.1
1999-09-12	0	0	0	0.1	0	0	0	0	0	0	0	0	0	0	0	0	0	0	0	0	0	0	0	0	0	0	0	8.7	0	0	0	3.3	0	0	0	0	0	0	0	0	0	0	0.1	0.2	0	0	0	0	0
1999-09-13	0	0	0	0	0	0	0	0	0	0	0	0	0	0	0	0	0	0	0	0	0	0	0	0	0	0	0	0	0	0	0	0	0	0	0	0	0	0	0	0	0	0	4.2	0	0	0	0	0	0
1999-09-14	0	0.5	0	0	0	0	0	0	0	0	0	0	0	0	0	0	0	0	0	0	0	0	0	0	0	0	0	0	0	0	0	0	0	0	0	0	0	0	0	0	0	0	0.3	0	0	0	0	0	0
1999-09-15	0	0	0	0	0	0	0	0	0	0	0	0	0	4.2	0	0	0	0	0	0	0	0	0	0	0	0	0	0	0	0	0	0	0	0	0	0	0	0	0	0	0	0	0	0	0	0	0	0	0
1999-09-16	0	0	0	0	0	2.1	0	0	0	0	0.1	0	1.5	3.3	0	0	0	0	0	0	0	0	0.2	0.2	1.5	2.1	0.2	2	0	0	0	0	0	0	0	0	0	0	0	0	0	0	0	0	0	0	0	0	0
1999-09-17	0	0	0	0	0	0.4	0	0	0	0	0	0	0	0	0	0	0	0	0	0	3.3	0	0	0	0	0.1	0.3	4.4	0	0	0	0.2	0	0	0	0	0	0	0	0	0	0.1	0	0.1	0	0	0	0	0
1999-09-18	0	0	0	0	4.4	3	0	0	1.5	0	0	0	0	0	0	0	0	0	0	0	0.3	0	0	0	0	0.5	0.5	1.3	0	0	0	5.3	0	0	0	0	0	0	3.7	0	0.9	0.1	0	0	0	0	0	0	0
1999-09-19	0	0	0	0	0.3	0	0	0	0.2	0	0	0	0	0	0	0	0	0	0	0	0	0	0	0	0	0	0.3	0	0	0	0	2.6	0	0	0	0	0	0	0	0	3.7	0	0	0.6	0.2	0.1	0	0	0
1999-09-20	0	0	0	0	0	0.8	0	0	0	0	0	0	0	0.8	0	0	0	0	0	0	0	0	0.2	0.2	0	0.1	0	0	0	0	0	0.2	0	0	0	0	0	0	0	0	0	0	0	0	0	0	0	0	0
1999-09-21	0	0	0	0	0	0	0	0	0	0	0	0	0	0	3.4	0	0	0	0	14.1	5.4	1.2	0	0	0	0	0	0	0	0	0	0	0	0	0	0	0	0	0	0	0	0	0	0	0	0	3.4	14.1	1.2
1999-09-22	0	0	0	0	0	0	0	0	0	0	0	0	0	0	2.9	0	0	0	0	13.6	2.4	0	0	0	0	0	0	1.8	0	7	7.9	3.8	0	0	0	0	0	0	0	0	0	0	0	0	0	0	2.9	13.6	0
1999-09-23	0	0	0	0	0	0	0	0	0	0	0	0	0	0	0	0	0	0	0	0	0	0	0	0	0	0	0	4.9	0	0.1	0.3	5.6	0	0	0	0	0	0	0	0	0	0	0	0	0	0	0	0	0
1999-09-24	0	0	0	0	0	0.2	0	0	0.5	0	0.3	0	0	0.8	0	0	0	0	0	0	0	0	0	0	0	0	1.2	1.1	0	0	0	1	0	0	0	0	0	0	0	0	0	0	0	0	0	0	0	0	0
1999-09-25	0	0	0	0	0	0	0	0	0	0	0	0	0	0	0	0	0	0	0	0	0	0	0	0	0	0	0	7.6	0	0	0	0	0	0	0	0	0	0	0	0	0	0	0.6	2.2	0	0	0	0	0
1999-09-26	0	0	0	0	0	1.7	0	0	0	0	0	0	0	0	0	0	0	0	0	0	0	0	0	0	0	0	0	3.4	0	0	0	0	0	0	0	0	0	0	2.2	0	0	0	2.8	0	0	0	0	0	0
1999-09-27	0	0.6	0	0	0	0	0	0	0	0	0	0	0	0	0	0	0	0	0	0	0	0	0	0	0	0	5.5	0	0	0	0	0	0	0	0	4	0	0	1.1	0	0	0	0.2	0	0	0	0	0	0
1999-09-28	0	0.1	0	0	0.4	0.3	0	0.9	1	0	0	1.1	0.4	11	0.1	0.3	1.1	2.6	0	0	3.8	1.7	1.2	1.2	0.4	0.4	1	1.3	0	0	0	2.1	0	0	0	0	0	0	0	0	0	0	0.9	0.6	0	0	0.1	0	1.7
1999-09-29	0	0	0	0	0	0.5	0	0	0	0	0	0	0	0	0	0	0	0.3	0	0	0	0	0	0	0	0	0	0	0	0.1	0.1	0	0	0	0	0	0	0	0	0	0	4.4	2.7	0.4	0.3	0	0	0	0
1999-09-30	0	0	0	0	0	0	0	0	0	0	0	0	0	0	0	0	0	0.3	0	0	0	0	0	0	0	0	0	0	0	0	0	0	0	0	0	0	0	0	0	0	0	0	0.2	0	0	0	0	0	0
1999-10-01	0	0	0	0	0	0	0	0	0	0	0	0	1.3	3.3	0	0.9	0	0.6	0	0	0	0	0	0	1.3	1.4	3	0	0	0	0	0	0	0	0	0	0	0	0	0	0	0.4	0	0	0	0	0	0	0
1999-10-02	0	0	0	0	0	0.2	0	0	0	0	0	0	0	0	0	0	0	0	0	0	0	0	0	0	0	0	0.2	0	0	0	0	0	0	0	0	0	0	0	0.7	0.2	0	0	1.4	0.4	0	0	0	0	0
1999-10-03	0	0	0	0	0	0.4	0	0	0	0	0	0	0	0	0	0	0	0	0	0	6.1	0	0	0	0	0	0	0	0	0	0	0	0	0	0	0	0	0	0	0.3	0	16.2	8.5	5.6	0	0	0	0	0
1999-10-04	0	0	0	0	0	0.1	0	0	0	0	0	0	0	0.1	0	0	0	0	0	0	0	0	0	0	0	0	0.3	4.7	0.2	0	0	0.1	0	0	0	0	0	0	2.5	0	0	5.2	2.6	0.3	0	0	0	0	0
1999-10-05	0	0	0	0	0	0	1.8	0	0	0.1	0	0	0	0	0	0	0	0	0	0	0	0	0	0	0	0	0	0	0.2	1.6	0.8	0	0	0	0	0	0	0	0	0	5.2	0.2	0.5	0	0	0	0	0	0
1999-10-06	0.3	0	0	0.4	0	0.5	25.7	0	0	0.1	0	0	0	0	0	0	0	0	0	0	0	0	0	0	0	0	0.2	0	0.2	0	0	0	0	0	0	0	1.9	0	0	0	0	0	0	0	0	0	0	0	0
1999-10-07	0	0	0	0	0	0	0.4	0	0	0	0	0	0	0	0	0	0	0	0	0	0	0	0	0	0	0	0	2.1	0	0	0	0.2	0	0	0	1.8	1	0	0	0	0	0	0	0	0	0	0	0	0
1999-10-08	0	0	0	0	0	0	0	0	0	0	0	0	0	0	0	0	0	0	0	0	0	0	0	0	0	0	1.7	1.1	0	0	0	0	0.3	0	0	0.2	0	0	0	0	0	0	0.8	0	0	0	0	0	0
1999-10-09	0	0	0	0	0	0	0	0	0	0	0	0	0	4	0	0	0	0.1	0	0	0	0	0	0	0	0	0	1.2	0	0	0	0	0	0	0	1.1	0.2	0.1	0	0	0	0	0.2	1.6	0	0	0	0	0
1999-10-10	0	0	0	0	0	0	0	0	0	0	0	0	0	2.9	0	0	0	0.3	0	0	0	0	0	0	0	0	0	0	0	0	0	0	0	0	0	0	0	0	0	0	0	0	0	0	0	0	0	0	0
1999-10-11	0	0	0	0	0	0	0	0	0	0	0	0	0.1	3.8	0	0	0	0.3	0	0	0	0	0	0	0.1	0.1	0	0	0	0	0	0.5	0	0	0	0	0	0	6.7	0	0	0	0	6.5	0	0	0	0	0
1999-10-12	0	0	0	0	0	0.3	0	0	0	0	0	0	0	1.8	0	0	0	0	0	0	0	0	0	0	0	0	1.1	0.9	0	0	0	0	0	0	0	0	0	0	0.1	0	0	0	2.7	0.2	7.2	0	0	0	0
1999-10-13	0	0	0	0	0	0	0	0	0	0	0	0	0	0	0	0	0	0	0	0	0	0	0	0	0	0	0	0	0	0	0	0	0	0	0	0	0	0	0	0	0	0	0	0.1	0	0	0	0	0
1999-10-14	0	0	0	0	0	0	0	0	0	0	0	0	0	0	0	0	0	0	0	0	0	0	0	0	0	0	0	0	0	0	0	1.9	0	0	0	0	0	0	1.6	0	0	0	0	0.3	0	0	0	0	0
1999-10-15	0	0	0	0	0	0	0	0	0	0	0	0	0	2.3	0	0	0	0.1	0	0	0	0	0	0	0	0.1	0	0	0	0	0	0	0.7	0	0	0	0.5	0	0	0	0	0	0.8	4.9	0	0	0	0	0
1999-10-16	0	0	0	0	0	0	0	0	0	0	0	0	0	0	0	0	0	0	0	0	0	0	0	0	0	0	0	0	0	0	0	0	0	0	0	0	0.4	0	0	0	0	0	14.5	0	0	0	0	0	0
1999-10-17	0	0	0	0	0	0	0	0	0	0	0	0	0	0	0	0	0	0	0	0	0	0	0	0	0	0	1.4	0	0	0	0	0	0	0	0	0	0	0	1	0.1	0	0	3.3	2.2	0.1	0	0	0	0
1999-10-18	0	0	0	0	0	0	0	0	0	0	0	0	0.1	1.2	0	0	0	0	0	0	0	0	0	0	0.1	0.1	0.8	3.3	0	0	0	0	0	0	0	0	0	0	0	0	0	0	12.6	0	0	0	0	0	0
1999-10-19	0	0	0	0	0	0.2	0	0	0	0	0	0	0	1.7	0	0	0	0	0	0	0.5	0	0	0	0	0.1	0.6	0.3	2	0	0	1.5	0.4	0	0	0.5	1.2	0	1	0	0	0	2	0	0.3	0	0	0	0
1999-10-20	0	0	0	0	0	0	0	0	0	0	0.1	0	0.1	0.4	0	0	0	0	0	0	0	0	0	0	0.1	0	0.3	1.3	0.1	0	0	1.7	4.4	0	0	4.6	0.9	0	0	0	0	0	0	1.1	0	0	0	0	0
1999-10-21	0	0	0	0	0	0	0	0	0	0	0.1	0	0.4	1.6	0	0.3	0	0.1	0	0	0	0	0	0	0.4	0.3	0.4	0.9	0	0	0	0.9	0.6	0	0.7	3.9	1.1	0	3.5	0.2	0.1	0.4	5.1	0	0	0	0	0	0
1999-10-22	0	0	0	0	0	0.1	0.4	0	0	0.3	0	0	0.1	0	0	0	0	0	0	0	0	0	0	0	0.1	0	0	6.5	0	0	0	5.1	0	0	0.1	9.9	2.9	0	0	0	0	1.9	0	0	0	0	0	0	0
1999-10-23	0	0	1.3	0	0	0	2.9	0	0	10.8	0	0.1	0	0.7	0	0	0.1	0	0	0	0.2	0.1	0	0	0	0	0.2	1.9	0	0	0	3.2	0	0	0	8.1	1.3	0	1.7	0	0	1.1	0.1	0	0	0	0	0	0.1
1999-10-24	0	0	5.4	0	0	0.1	0	0.4	0	1.4	0	0.1	0.3	0.1	0.3	0.1	0.1	0	0.4	0.1	0.3	0.1	0.1	0.1	0.3	0.1	0	0	0.1	0	0	1	0	0	0	0	0.2	0	2.1	0	0	0	2.1	0	0	0	0.3	0.1	0.1
1999-10-25	0	0	0	0	0	0	0	0	0	0	0	0	0.1	0.3	0	0.1	0	0	0	0	0	0	0	0	0.1	0.1	0	0	0	0	0	0	0	0.6	0	0	0	0	1.1	0	0	1.9	4.4	54	0	0	0	0	0
1999-10-26	0	0	0	0	0	0	0	0	0	41.1	0	0	0	0	0	0	0	0	0	0	0	0	0	0	0	0	0.1	0	0	0	0	0	0	0	0	0	0	0	7.8	0	2.4	1.8	13.3	4.5	0	2.4	0	0	0
1999-10-27	6.9	7.2	0.3	4.4	0	0	0	0	0	2.3	0	0	0	0.5	0	0	0	0.3	0	0	0	0	0	0	0	0	0	0.1	0	0	0	0.5	0	0	0	0	0	0	0.5	0	0.6	0	0	0.6	0	0	0	0	0
1999-10-28	0.3	0.2	0.3	2.4	0	0	0	0	0	1	0	0	0	0	0.2	0	0	0	0	0.1	0	0	0	0	0	0	0.2	0	0	0	0	0	0.5	0	0	0	0	0	0.8	0	0.5	0	0.1	0.1	1.6	0	0.2	0.1	0
1999-10-29	0	0	0	0	0	0.2	0	0	0	0	0	0	0	0	0	0	0	0	0	0	0	0	0	0	0	0	0.7	0.6	0	0	0	0.4	0	0	0	0	0	0	0.5	0	0	0	0.1	0.2	0	0	0	0	0
1999-10-30	0	0	0	0	0	0	0	0	0	0	0	0	0	0.7	0	0	0	0	0	0	0	0	0	0	0	0	0	0	0	0.4	0	0.2	0	0	0	0	0	0	0	0	0.6	0	0	1	0	0	0	0	0
1999-10-31	0	0	0	0	0	0	0.6	4.9	0	0	0.2	1.8	0.2	0	0.1	0.2	1.8	0	0	0.5	0.2	2.2	1.9	1.9	0.2	0	0.2	0	0.8	0.2	0	0	0	0	0.4	0.4	0	0	0	0	0.3	0	0	0.2	0	0	0.1	0.5	2.2
1999-11-01	0	0	0	0	0	0	0	9.1	0	0	75.4	6	19.2	30.9	0.5	14.8	6	22.8	0	1.7	1.2	7.8	13.3	13.3	19.2	16.1	0	0	0	0	0	0	0	0	0	0	0	0	0	0	0	0	0	0	0	0	0.5	1.7	7.8
1999-11-02	0	0	0	0	0	0	0	0	0	0	10.6	0	43.9	25.9	0	22.3	0	5.6	0	0	0.2	3.8	4.6	4.6	43.9	26.9	0	0	1.2	0	0	0	0	0.1	0	0	0	0	0	0	0	0	0	1	0	0	0	0	3.8
1999-11-03	0	0	0	0	0	0	0	0	0	0	0	0	1.8	1.2	0	0.5	0	0.4	0	0	0	0.2	0.1	0.1	1.8	1.2	0.1	0.7	0	0	0	0	0	0	0	0	0	0	0	0.1	0	0	0.6	0	0	0	0	0	0.2
1999-11-04	0	0	0	0	0	0.4	0	0	0	0	0	0	0	0	0.5	0	0	0	0	0	0.2	2.1	0.3	0.3	0	0	0.2	0	13.2	0	0	0.1	0	0	1	0	0	0.9	1	0.2	0	0	6.4	27.7	0	0	0.5	0	2.1
1999-11-05	0	0.1	0	0	3.2	0.1	0	0	21.6	0	0	0.4	4	1	0.8	1.8	0.4	2.9	23.8	0.2	0.6	1.4	6.9	6.9	4	9.5	0.1	0	2.7	0	0	0.1	0.2	0.1	0	0	0	0	0	0	0	0	1.9	1.7	0.3	0.4	0.8	0.2	1.4
1999-11-06	0	0	0	0	0	0.8	0	0	0	0	0	0	0	0	0	0	0	0	0	0	0.4	0	0	0	0	0	0	0	0	0	0	0.3	0	0	0	0	0	0	0	0	0	0.7	0.2	6.3	2.8	76.8	0	0	0
1999-11-07	0	0	0	0	0	0	0	0	0	0.1	0	0	0	0.2	0	0.1	0	0.4	0.2	0	0	0	0	0	0	0	0	0.3	0	0	0	1.3	0	0	0	0	0	0	0	0	0	0.5	0.1	6.4	0.5	20.2	0	0	0
1999-11-08	0	1	0	0	1.3	0	0	0	2.2	1.2	0	0	0	1.2	2.2	0	0	0	2.3	0.8	0	1.5	1.1	1.1	0	0.8	0.1	0	0	0	0	0	0	0	0	0	0	0	0	0	0.1	0	0.5	0.9	0.1	0.2	2.2	0.8	1.5
1999-11-09	0	1.3	0.6	0	3.2	0.1	0.3	12.9	1.3	0	0	10.6	6.2	7.5	3.5	11.9	10.6	7.7	30.2	21.4	26	7.1	7.8	7.8	6.2	6.3	0.5	0	0.5	0	0	0	0	0	0	0	0	0	0	0	0	4.7	0.8	4	0	0.1	3.5	21.4	7.1
1999-11-10	3.2	0.8	4.6	8	0.2	0	3	0	0.1	10.2	0.6	0	0.4	0.2	0.1	0.3	0	0.5	0.1	0	0	0	0	0	0.4	0	0.1	1.6	1.1	2.5	15	1.8	0.6	1.4	0.9	0	0.1	0.1	0	0	0.3	3	6.4	1.1	0	0	0.1	0	0
1999-11-11	0.5	0	0	0.4	0	0	8.3	0	0.1	0	0.2	0.1	0	0.2	0.6	0	0.1	0	1.1	0.1	7.1	1.2	0	0	0	0	0.3	3.5	0	4	9.9	0	3.9	2.4	4.4	5.6	15.1	5.4	2	1.3	2.3	0.3	12.6	3.5	0	0	0.6	0.1	1.2
1999-11-12	0	0.1	0.9	0	0	0	0	0	0	0	0	0	0	0	0	0	0	0	0	0	8.7	0.9	0	0	0	0	0.5	3.5	0	0	0	5.2	0	0	2.4	13.1	3	0.9	4	4.2	0	4.6	0	1.1	0	0	0	0	0.9
1999-11-13	0	0	0	0	0	1.6	0	3.1	0.2	0	0	1.3	0.3	0	12.1	0.2	1.3	1.6	7.6	25.7	2.6	2	0.6	0.6	0.3	0.1	2.7	1.6	0	0	0	3.7	0	0	0	4.3	0	1.3	0	0	0.1	0	0	0	0	0	12.1	25.7	2
1999-11-14	0	0.7	0	0	0	1.6	0	0	0	0	0	0	0.2	0.2	0	0.1	0	0	0	0	0	0	0	0	0.2	0	0	2.6	0.1	0	0	0	0	0	0	0	0	0	0.2	0	0	0	0	4.5	0.2	0	0	0	0
1999-11-15	0	0	0	0.1	0	0.1	0	0	0	0	0	0	0	0	0	0	0	0	0	0	0	0	0	0	0	0	0	0	0	0	0	0	0.8	0.1	2.6	0	0	0.5	0	0	0.1	0	0	1.7	0	0	0	0	0
1999-11-16	0	0	0	0	1.1	0.2	0	0	0.5	0	0	0	0	0	0	0	0	0	0	0	0	0	0	0	0	0	0	0	0	0.1	0	0	7.6	0.4	6.9	0.1	0.7	2.2	0.2	0	0	0	0	0.1	0	0	0	0	0
1999-11-17	0.4	0	0	0	15.3	0.3	0.2	0	5.6	0	0	0	0	0	0	0	0	0	0	0	0	0	0.2	0.2	0	0.2	0	0	0.1	0	0	0.2	0.4	0	2.3	2.8	5.3	0.4	0.2	0.7	0.8	13.1	0	2.7	0	0.1	0	0	0
1999-11-18	29.9	1.7	2.9	3.8	1.4	3.9	1.7	16	2.4	5.9	0.2	8.8	1.2	0.1	2.2	2.7	8.8	0.9	0.1	15.8	1	2.1	1.9	1.9	1.2	1.1	0	0	0	0	0	0	0	0	0	0.5	0	0.1	0	0	0	0	0	0	0	0.1	2.2	15.8	2.1
1999-11-19	11.1	15.6	18.6	14.8	1	8.7	5.4	21.9	0.2	0.1	4	8.5	6.2	0	12.4	16.5	8.5	21.8	14.6	17.6	1.5	2.1	1.4	1.4	6.2	0.9	0.9	2.2	0.3	0.8	0.5	5.1	0.9	1.1	0	0	0	0	0.1	0	1	0	1.8	0	0	0	12.4	17.6	2.1
1999-11-20	5.9	13.4	4	9.1	0	0.8	11.4	0.9	0	54.2	0	0.1	0	0	4.9	0.3	0.1	1	2	0.7	1.5	0.7	0	0	0	0.2	0	1	0.5	0.5	0.5	2.5	0	0	0.1	0.3	0.6	0.1	0.3	0	0	0	0	0	4	1.2	4.9	0.7	0.7
1999-11-21	43.9	9.9	30.1	30.7	1.6	0.4	17.4	46.1	0	4.3	0	21	4.5	0.4	0	1.5	21	0	0	5.3	3.5	0.2	0.5	0.5	4.5	0.4	0.2	0.1	0	0	0	0	0.2	0	0	0.3	0	0	2.6	0	1.1	0	0	0	56.4	0.1	0	5.3	0.2
1999-11-22	0.5	0	1.4	9.8	8.4	23.9	14.5	44.2	0	0.8	0	12.7	3.2	0	0.1	0	12.7	0	0	2.5	0.9	2.3	1.3	1.3	3.2	0	0	2.8	0	0	0	0	0	0	0	0	0	0	0	9.2	1.5	0	0	0	4.4	3.9	0.1	2.5	2.3
1999-11-23	8.6	0.9	18.4	46.4	0	0	1.8	13.2	0	0.1	0	13.7	8.9	1.5	12.1	7.7	13.7	7.1	6.5	10.6	13.3	11	20	20	8.9	3	0	0	0	0	0	0	0	0	0	0	0	0	0.5	0.6	0	0.1	0	7.1	0.9	0.2	12.1	10.6	11
1999-11-24	39.9	1.2	106.3	26.5	0	0	2.5	0	0	0	0	0.1	0.4	0	0	0.9	0.1	0.6	0.1	0	1.3	0.9	0.5	0.5	0.4	0	0.6	0.2	0.1	0	0	0.6	0.2	0	0	0	0.1	0	0	0	3.4	0.4	0	0	0	0.2	0	0	0.9
1999-11-25	0	0	0.3	0	0	0.1	0.6	0	0	0	0	0	0	0	0	0	0	0	0	0	0	0	0	0	0	0	0	0	0	0	0	0	0	0	0	0	0	0	0	0	0	0.5	3.3	6.2	0	0	0	0	0
1999-11-26	0	0	0	0	0	0	0	0	0	0	0	0	0	0	0	0	0	0	0	0	0	0	0	0	0	0	0	0	0	0	0	0	0	0	0	0	0	0	0	0	0	1.9	0.2	0.2	15.4	0	0	0	0
1999-11-27	0	0	0	0	0	0.1	0	0	0.1	0	0.2	0	0.4	2.2	0	1.1	0	0	0	0	0	0	0	0	0.4	0.2	0	0.1	0	0	0	0.2	0	0	0	0	0	0	0	0	0	15.1	10.2	2	6.9	8.2	0	0	0
1999-11-28	0	0	0	0	0	0.5	0	0	0	0	1.3	0	0	1.3	0	0	0	0	0	0	0	0	0	0	0	0.2	0	1.2	0	0	0.3	0	0	0	0	0	0	0	0.1	0	0	2.8	23.3	5.2	3.3	4.2	0	0	0
1999-11-29	0	0	0	0	3	0.1	0.1	0	0.7	0	3.3	0	0	1.3	0.5	0	0	1.7	1.2	0.2	0.7	0	0	0	0	0	0.3	0.1	0.2	0	0	0	0	0	0	0	0.1	0	0	0	0.3	1.7	7.4	0	0.4	0	0.5	0.2	0
1999-11-30	0	0	0	0	2.7	0	0.1	0	0	0	0.1	0	4.3	0	0	1.4	0	2.3	0	0	0.1	0.4	2.6	2.6	4.3	4.7	0	0	4.8	2.9	0.8	0	0	0	0	0.1	0	0	0	0	4.2	8.8	14.3	1.5	0	0	0	0	0.4
1999-12-01	0	0	0	0	0.5	0.2	5.6	0	0	0	0.4	0	0	0	0	0	0	0	0	0	2.4	0	0	0	0	0	1.4	0.3	6	2	0.6	0.1	0	1.2	0	0.2	0	0	1.6	0	1.8	0	1	0.5	1.1	0	0	0	0
1999-12-02	0	2.2	0	0	0	0.6	6.7	0	0	0	0	0	0	0	0	0	0	0	0	0	0	0	0	0	0	0	0	0	0	0.1	0.1	0	0	0	0	0	0	0	0.7	0	0.1	3	0.8	1.6	31.8	9	0	0	0
1999-12-03	0	4	0	0	0	0.3	0	0	2.8	0	0	0	0	0	0	0	0	0	0	0	0	0	0	0	0	0	0	0	0	0	0	0	0	0	0	0	0	0	0	0	0	1.9	1.3	3.2	44.8	4.2	0	0	0
1999-12-04	0	12.5	0	4.7	0.3	0.3	0	0	0	10.7	0	0	0	0	0	0	0	0	13.9	0	0	0.2	0	0	0	0	0	0	0	0	0	0	0	0	0	0	0	0	0	0	0	0.6	25.7	2.3	6	1.1	0	0	0.2
1999-12-05	1.3	0	3.6	0.6	0	2.3	0.7	0	0	0	0	0	0	0	0	0	0	0	0	0.6	0.1	0.2	0	0	0	0	0	0	0	0	0	0	0	0	0	0.1	0	0	0	0	0	45.4	12.8	4.8	7	15.6	0	0.6	0.2
1999-12-06	5.5	1.8	13.1	2.5	1.4	0	0.4	35.4	0	0.3	0	10.1	8.2	0	5.4	12.4	10.1	0	32.8	0.5	0.4	0	0	0	8.2	0	0.4	0.4	0	0	0	0.4	0	0	0	0	0	0	0.8	0.1	0	85.7	5.4	1.8	0	0	5.4	0.5	0
1999-12-07	0.5	2.8	0	13.8	10.1	3	0.5	0	0.7	1.8	0	0	0.5	0.6	0.2	6.3	0	1	0.2	0	0	0.3	0.4	0.4	0.5	0.6	0.8	0.4	0	0	0	0.9	0	0	0.2	0	0	0	0	0.1	0	6.3	7	7.6	0	5.3	0.2	0	0.3
1999-12-08	0.8	3.6	0	0.3	10.5	0.5	0	23.9	25.8	5.4	6.2	22.7	23.2	4.4	27.4	22.1	22.7	16.2	19.4	22.9	9	19.1	18.1	18.1	23.2	15.7	2	1.2	7.2	0.8	1	3.5	0.1	0.5	0	0	0	0	0	0	0.1	9.5	0.2	0	0.4	1.3	27.4	22.9	19.1
1999-12-09	9	2.4	5.6	10.9	1.7	3.5	1.1	0.2	0.5	35.8	10.3	0.8	0.8	0.6	0.1	3.8	0.8	9.6	0.1	2.3	4.6	0.6	1.5	1.5	0.8	3	0.7	15.7	22.5	0.7	5.1	11.8	2.1	0.9	0	0.1	0.2	0	0	0	1.3	9.4	0	0.2	12.8	0.7	0.1	2.3	0.6
1999-12-10	22	17.4	16.8	23.7	5.9	0.5	19.5	18.7	10.7	1.4	2.9	6.5	29.3	11.5	1.9	68.7	6.5	25.4	15.3	5.9	19.6	8	11.1	11.1	29.3	17	5.5	0.7	8.9	12	26.7	0.8	3.5	40.8	9	1.1	4.5	1.4	0	0.8	51.3	27.2	16.3	0.1	2.1	0.3	1.9	5.9	8
1999-12-11	1.5	0.4	0.1	1.4	1.2	0.9	2.3	0.8	1.6	6.6	1.2	2.3	0.4	24.8	8	0.4	2.3	2.3	0.4	4.1	8.8	3.9	2.1	2.1	0.4	2.4	4.6	3.9	12	7.8	13.6	13.8	19.8	1.2	7	14.4	2.3	0.7	0.3	1.6	4.4	2.3	0.2	0.7	2.1	6.4	8	4.1	3.9
1999-12-12	0.5	2.6	0.7	0.6	1.2	1.5	5.4	26.3	3.5	0.4	4.5	27	11.9	6.4	5.6	6.8	27	5.6	10.1	9	10.6	14.5	14.6	14.6	11.9	8.8	19.7	13	10.3	22.9	21	42.3	38.2	17.4	22.3	68	22.1	4.4	5.3	3	31.6	1.2	1.6	0.1	0.1	1.2	5.6	9	14.5
1999-12-13	2.9	1.3	6.5	0	0.7	7.6	2.2	0	7.2	0	1.1	0	0.2	0.2	4.3	0.7	0	1	4.2	4.1	3.5	0.1	0	0	0.2	0.5	0.7	0.6	0.8	1.1	1.5	21.5	5.9	2	16.4	7.3	3.6	1.8	4.9	18.7	0	7.2	8.4	5.1	0.2	0	4.3	4.1	0.1
1999-12-14	0	0.4	0.4	0.2	0.9	4.6	0	1.7	0.6	0	0	0.1	0.1	0	0	2.5	0.1	2.4	0	0	0.6	0	0	0	0.1	0	0.6	0.1	0	0	0.3	0	2.2	2.9	10.3	4	10.9	9.7	11.4	29.7	0.2	4.9	21.9	0.5	0	0	0	0	0
1999-12-15	0	0	0.4	0	0	0.4	0	0	0	0	0	0	0	0	0	0	0	0	0	0	0	0	0	0	0	0	0.1	0	0	0	0	0	0	0	0	0.3	0.1	0	1.5	3.5	0	23.1	9.2	0	0	0	0	0	0
1999-12-16	0	0	0	0	0	0.7	0	0	0	0	0	0	0	0	0	0	0	0	0	0	0	0	0	0	0	0	0	0	0	0	0	0.7	0	0	0	0	0	0	0	0	0	10.7	0.5	33.1	0	0	0	0	0
1999-12-17	0	0	0	0	0	0	0	0	0	0	0	0	0	0	0	0	0	0	0	0	0	0	0	0	0	0	0.1	0	0	0	0	5.6	0	0	0	0	0	0	0.2	0	0	0	0	13.6	0	0	0	0	0
1999-12-18	2.2	0	0	0	1.4	14.3	21.9	5.6	3.4	0	0	7.9	7.2	0	0	2.6	7.9	0	0	0	4.2	4.8	9.4	9.4	7.2	1.9	0	0	0.8	1.3	0	0.8	0	0	7.2	0	0.7	7.5	0.1	19.8	74.5	23.8	0.7	4.3	0	0	0	0	4.8
1999-12-19	0.1	1.9	0	0.5	0	0.1	3	1.6	0	0	0	1.1	6.6	0	0.1	1.6	1.1	0	0	0	0.8	1.3	1.6	1.6	6.6	1.8	0	0	1.7	0.7	0	0	0	0	0.7	0	0.3	3	0.3	0.8	5.5	25.4	0	11	4.1	1	0.1	0	1.3
1999-12-20	0	0.2	0	0	0	0	0	1.2	0	0	0	1.7	0.4	0.3	0.3	0.4	1.7	0.2	0.2	0.4	3.3	2.4	4.9	4.9	0.4	0.5	0	0	0	0	0	0	0	0	0.1	0.1	0	1.2	4.2	0	0	14.1	0.2	35.1	0.3	0.3	0.3	0.4	2.4
1999-12-21	0	0.1	1.1	1.1	0	0.8	50.7	5.1	0	21.8	15.9	5.6	1.9	2.1	0	2.2	5.6	2	0	0	0.3	4.2	1.6	1.6	1.9	1.7	25.7	17.6	34.7	4.6	5.5	12.4	1.2	0.2	0.3	0.1	0	0	0	0	6.3	1.3	0.8	14.3	0.1	0.2	0	0	4.2
1999-12-22	0	0.1	0	0	0	0.1	0	0	0	0	3.1	0	0	1.1	0	0	0	0.6	0	0	0	0	0	0	0	0	18.2	23.1	4.4	2.3	5.3	21.2	0.2	0.2	0.2	0.1	0.4	0	0.8	0	6	0	2.4	0.3	0.2	0.2	0	0	0
1999-12-23	0	0.2	0.1	4.2	0	0	17.5	0	0	0	0	0	0	0	0	0	0	0	0	0	0	0	0	0	0	0	0	3.1	1.7	1.2	0.8	27.3	0	0.2	0	1.6	1.9	0	1.1	0.6	4.9	1.5	3.3	0.5	0.2	0.3	0	0	0
1999-12-24	0	0.2	0	0.5	0.7	0	0	0	0	0.1	0	0	0	0	0	0	0	0	0	0	0	0	0	0	0	0	0	0	0	0	0	0	0	0	0	0	0.1	0	0	0	0	6.5	1.5	0.2	8.3	2.7	0	0	0
1999-12-25	0	0	0	0	0	0	0	0.3	0	0	0.9	0.1	0	0.1	0.1	0	0.1	0	0	0.1	0	0	0	0	0	0	0	0.6	0.2	0	0	0	0	0	0	0	0.2	0	0	0	0.7	0.2	0	0	21.4	5	0.1	0.1	0
1999-12-26	0	0	0	0	0.9	0.2	0	0.2	0.2	0.4	0	0.5	0.7	1.1	0	0.3	0.5	0.4	0	0	6.7	1.3	2.8	2.8	0.7	1.7	0.4	0.5	0.1	6	7.5	0.1	0	0.3	0	0.1	0	0	0.6	0	0.3	16.6	0	1.4	0	0.1	0	0	1.3
1999-12-27	0	0	0	0	0.4	0.4	0	0.4	0.5	0.2	0.1	0.9	0.1	0.1	0	0.2	0.9	0.1	0	0	3.6	2.6	2.1	2.1	0.1	0.4	36.5	50.4	11.4	15.7	20.9	57.8	0.5	3	0	0	0.4	2.1	0	0.5	6.9	2.3	0	0.3	0	0	0	0	2.6
1999-12-28	0.1	0	0.2	0	0	0	0.4	0.3	0	0	0.1	0.4	0.5	1.3	0	0.6	0.4	1.7	0	0	4.1	0.8	0.7	0.7	0.5	0.4	1.5	0.8	0.7	2.1	0.8	0.1	0.1	16.6	0	0	0	0	0	0	5	11.8	1	1.8	0.4	0	0	0	0.8
1999-12-29	0.9	1.8	0.4	2.1	0	0.1	2.1	0	0	2.8	0	0	0	0	0	0	0	0	0	0	0	0	0	0	0	0	0	0	0	14	4.1	1.8	0	0.2	0	0	0	0	0	0	24.5	5.4	1.3	4.4	2.8	27	0	0	0
1999-12-30	3.1	0.7	0.7	1	0	0	0.1	0	0	25.6	0	0	0	0.5	0	0	0	0	0	0	0	0	0	0	0	0	0	0	0	0	0	0	0	0	0	0	0	0	0	1.3	0.3	0.9	0	1.4	0	2.4	0	0	0
1999-12-31	0	0.2	0	0	0	0	0	0	0	0.6	0	0	0	0	0	0	0	0	0	0	0.1	0	0	0	0	0	0	0	0	0	0	0	0.1	0	2.8	5.6	21.3	21.3	0	1.3	0	6.5	2	1.2	0	0	0	0	0
2000-01-01	3.9	0.6	9.7	0.9	0	0	1.8	0	0	19.1	0	0	0	0.2	0	0.1	0	0	0	0	0.1	0	0	0	0	0.1	0	0	0	1.3	0.5	0	0.1	0.3	0	0	0	0	0	0.7	4	0	0	0	0	18.7	0	0	0
2000-01-02	11.6	4.9	13.5	17.6	0.5	0.4	6.3	0.2	1.2	0.9	5.1	0.2	0.2	4.7	0.6	0	0.2	0.3	1	0.4	0.8	0.4	0.4	0.4	0.2	1.5	0.5	0.6	0	0	0	0.3	0.4	0	0.3	4.7	6	6.1	1.3	1.3	0	0	0.1	0	0	13	0.6	0.4	0.4
2000-01-03	0	0	0	0.2	0	0.3	5.8	0.1	0	0.6	0	0	0	0	0	0.1	0	0	0	0	0	0	0	0	0	0	0	0.4	0	2.9	2.1	0.3	4.7	1.6	1.4	1.9	0.3	0.3	1.7	4.8	1.9	20.4	2.7	12.2	49.5	26.4	0	0	0
2000-01-04	0	0	0	0	0.2	0.2	0.1	0.6	0	0.2	0	0.8	0	0.5	0	0	0.8	0.4	0	0	0.8	0.7	0.1	0.1	0	0	0	0	1.3	4.6	2.1	0.4	0.7	3.8	6.6	5	3.4	1.2	1.8	0.4	8.3	7.5	3.3	2.6	4.2	7.4	0	0	0.7
2000-01-05	2.5	0	0	3.5	0	0.2	32	1.5	0	0	11.8	0.9	1.2	10.5	0	0.4	0.9	5	0.2	0	0.4	1	0.7	0.7	1.2	3.4	4.4	4.6	20.4	5.3	5.1	5.6	0.6	0.8	0.6	2.9	1.9	0.8	0	0.2	7	12.7	1.4	1.1	40.6	6.6	0	0	1
2000-01-06	0	0	0.2	2.1	0	0	0.8	0	0	0	4.1	0	0	1.8	0	0	0	0.2	0	0	0	0	0.3	0.3	0	0	0.1	0	0	1.8	0.5	0	0.7	2.1	0.1	0.2	0.3	0.3	0	0	7.7	3.9	1.6	3.2	33	11	0	0	0
2000-01-07	3.3	1.1	23.2	4.4	0	0.1	0	0	0	0.7	0.9	0	0	0	0	0	0	0	0	0	0	0	0	0	0	0	0.4	1.8	1.3	5.5	4.7	1.6	0	5.4	0	0.1	0	0	0.2	0.1	4.9	1.1	3.1	0.3	0	0.8	0	0	0
2000-01-08	17.8	0.1	7.1	6.5	0.5	9.6	5.9	0.5	12.9	24.9	1.1	2.4	5.4	6.8	2.4	2.5	2.4	3.1	11.6	0.7	14.6	11.2	8.8	8.8	5.4	6.7	0.5	0	0	0	0	0.2	4.1	0	2.6	0	0	0	0.3	0.7	0	5.8	10.2	24	24	27.6	2.4	0.7	11.2
2000-01-09	39.3	14.6	22.3	36.1	1.3	0.5	28	1.8	0	8	5.9	0.8	1.1	1.2	1.2	0.5	0.8	2.4	0.2	0.9	0.3	0	0	0	1.1	0.8	31.1	32.1	6.5	1.2	5.6	34.7	6.9	4.8	3.6	1.6	4.7	3.6	3.1	0.1	3.3	1.2	4.8	5.5	1.7	0.4	1.2	0.9	0
2000-01-10	11.2	13.7	11.3	7.7	4.5	19.9	1.5	8.3	10.4	10.7	0.1	7.2	3.3	0.3	40.8	4.6	7.2	1.9	28	34	0.3	6.5	3	3	3.3	0.9	13.9	129.6	0.9	4.2	11.6	87.2	0.5	1.8	38.5	59.7	14.3	9.5	0.6	0.5	3.2	0	0	1	12.8	6.7	40.8	34	6.5
2000-01-11	13.2	2.4	23.8	9.8	3.6	12.9	4.9	22.2	18.7	13.1	3.1	17.9	8.9	3	23.1	13.9	17.9	9.4	26.4	15.9	10.9	16.3	10.1	10.1	8.9	6.6	1.5	15.1	4.1	5.6	2.6	18.1	7.9	0	2.6	1.5	1.3	0.1	2.1	4.4	4.8	0	0	0	0	0	23.1	15.9	16.3
2000-01-12	25.8	14.5	34.3	10.8	0	11.1	3.2	3.9	0	3.7	2.6	2.8	2.2	6	10.3	1.1	2.8	2.1	9.4	3.4	15.3	1.2	0.4	0.4	2.2	2.8	2.4	4.3	1.9	1.3	0.5	4.8	10.5	9.8	1.7	3	2.9	2.4	0.6	1	8.7	2.9	0	0	1	0	10.3	3.4	1.2
2000-01-13	70.8	13.2	8.5	107.6	0	0	2.7	0.2	0	0	1.1	0	0	0	0	0	0	0.3	4.5	0	0	0	0	0	0	0	0.9	0.1	0	3.3	0	0.3	0	4.2	19.9	17.2	16.8	10.1	24.3	16.6	0.7	6.4	0	1.3	25.9	11.1	0	0	0
2000-01-14	0.8	0	0	0	0	0	8.1	0.3	0	0	0	2	0.1	3.5	0	0	2	0.2	0	0	0	1.9	0.1	0.1	0.1	0.1	0	2.6	9.7	0	0	4.1	2.6	0	0	30.8	9.3	0	12.7	4.7	0	18.1	0	0.4	1.7	0	0	0	1.9
2000-01-15	28.3	0	14.3	0	0	0.1	0.2	0	0	0	0	2.1	26.2	1.4	0	15.6	2.1	0	0	0	17.5	2.2	1.5	1.5	26.2	7.8	0	9.3	25.8	0	0.4	10.5	0.3	0.8	1.9	0.6	2.4	10	6.9	3	0	0.5	4.7	0	43	2.6	0	0	2.2
2000-01-16	0	12.9	0	0.7	0	0.1	17.6	0.2	0	0	0.4	0	0	0	0	0	0	0	0	0	0	0	0	0	0	0	0	0	0	0.1	0	0	2	0.8	2.4	1.6	4.3	15.8	14.7	3.9	0.9	0	47.9	0.3	0	0.6	0	0	0
2000-01-17	2.2	0	6.1	1	22.3	0.7	9.9	4.8	35.4	1.7	0.7	5.1	7.3	0.2	0	6.4	5.1	4.5	4.9	2.2	2.8	7.6	17.8	17.8	7.3	6.7	0	0	1.4	0	0	0	36.2	0.7	21.5	9.1	7.4	4.4	37.4	48.1	0.1	0	8.4	0.5	0	0	0	2.2	7.6
2000-01-18	7.2	24.6	1.3	11	9.6	0.2	16.8	104	12.6	0.3	9.9	88.2	28.9	5.1	27.6	28.3	88.2	21.6	17.8	14.8	2.7	55.1	47.9	47.9	28.9	22.1	2.9	2.3	4.6	0.8	0.5	0.5	2.1	0	0.5	0.2	0	6.1	2.4	3.9	4.6	0	18.7	13.5	0	0.3	27.6	14.8	55.1
2000-01-19	0.7	3	0	6.1	7.2	14.5	0	2.3	1.3	2	20.8	0.5	4.6	4.5	2.9	6	0.5	2.6	3.8	0.9	3.5	0.8	3.4	3.4	4.6	3.1	9.8	6.2	10.3	0.9	0.9	1	19.4	0.5	6.7	3.5	3.3	3.1	0.1	1.1	1.2	0	5.3	7	0	3	2.9	0.9	0.8
2000-01-20	0	0	0	0	1.5	65	0	1.9	8.5	0	2	2.6	1	1.6	4.6	0.6	2.6	0.4	6.7	2.4	6.2	2.9	1.7	1.7	1	1.6	0.1	0.8	1.9	1.8	1.6	0.9	0.6	0.9	1.5	0.8	1.1	0.9	0.1	19	1.7	2	0.7	4.5	0	0	4.6	2.4	2.9
2000-01-21	0	0	0	0	0.5	13.6	0	1.4	1.4	0	0	2	0.8	0	1.9	0.6	2	0.1	2.2	1.3	0.5	2.1	1.7	1.7	0.8	0.5	0	0	0	0	0.1	0	0	2	1.2	0.7	0.6	0	0	0.6	0.2	0	1.1	4.7	0	6.3	1.9	1.3	2.1
2000-01-22	0	0	0	0	0	0.8	0	0	0	0	0	0	0	0	0	0	0	0	0	0	0	0	0	0	0	0	0	0	1.8	0.1	0	0	0.6	1.2	0	0.2	0.6	0.2	0	0.9	0.3	1.3	5.5	7.4	0.5	0.4	0	0	0
2000-01-23	0	1.3	0	0	0	0	0.3	0	0	0	15.7	0	0	1.1	0	0	0	0.7	0	0	0	0	0	0	0	0	4.8	1.5	4.8	0.9	0.5	0	0	0	0	0.1	0.1	0	0	0	2.3	4	1.7	0	0	1.5	0	0	0
2000-01-24	0	0	0	0	0	0	0.1	0	0	0	1.6	0	6.1	0.9	0	4.4	0	1.1	0	0	0.2	0.1	1.3	1.3	6.1	5.2	0.8	0.1	2.2	0.4	0.4	0.5	3	0.2	0.2	0	0	0	0	0.3	0.4	16.3	2.5	0.5	0	3.5	0	0	0.1
2000-01-25	0	0	0	1.7	0	0.2	0.3	0	0	0	0.1	0	0	0.4	0	0	0	0	0	0	0	0	0	0	0	0	0	0	0	0.1	0	0.1	0	0	0	0	0	0.1	0	0.3	0.1	6.5	1.5	2.3	0	0	0	0	0
2000-01-26	4.9	10.3	0.1	25.6	0	0.4	6.1	0.6	0	20.4	0.4	0.4	1.7	0.2	0.1	2.6	0.4	6	0	0	0	0.3	0.2	0.2	1.7	2.1	6.9	7.1	0.4	0.1	0	1.8	0.1	35.6	2.9	0.9	3.5	5.4	0	0.1	0.3	0	1.2	0.9	26.7	36.6	0.1	0	0.3
2000-01-27	0.2	55.3	0	29.8	0.1	0	0.5	2.5	17.4	3.8	8.6	1.9	0	0	1.3	0	1.9	0	3.7	0.4	0.2	1.3	0.3	0.3	0	0	0.3	2.7	1.2	0.4	0.3	1.3	3.5	15.7	0.3	8.5	3.6	1.4	0.5	0	0.2	0	17.1	0.8	9.9	6.5	1.3	0.4	1.3
2000-01-28	0	4.6	0.8	15.4	0	0.2	0.2	0.9	0	0	0	0.2	0.1	0.1	0.8	0	0.2	0	0	1.6	11.1	0.5	0.8	0.8	0.1	0.5	0	0.4	0	0	0	0.3	1.7	0.2	0.2	5.7	1.6	1	1.4	0.7	0.1	0	3.6	0.6	1.3	0.7	0.8	1.6	0.5
2000-01-29	0.3	1.8	27.6	1.8	21	0	0.3	5	2.5	15.8	1.5	0.6	0.4	2.7	6.6	0	0.6	1.3	4.2	26.3	0.3	0	0	0	0.4	3.3	0.6	0.1	0.7	2.7	3.3	1.8	0.5	8.8	0.6	59.7	21.2	3	0	0.2	4.6	0	4.4	3.5	0	0	6.6	26.3	0
2000-01-30	5.1	4	13.2	1	13.9	0.8	1.3	40.7	14	2.2	0.1	56.5	10.6	2.9	41.2	13.9	56.5	3.8	32.5	32.3	12.5	33.2	12.2	12.2	10.6	5.4	3.3	12	0.8	0.7	0.8	10.7	12.5	16.5	2.2	17.3	9.7	4.9	24.9	13.7	10.5	0	3.9	0.1	0	0	41.2	32.3	33.2
2000-01-31	0.2	0	3.8	0.6	0	6.9	1.2	10.2	0.6	4.7	0.1	11.9	1	0.4	3.2	1.2	11.9	0.2	0.5	1.1	9.3	12.5	3	3	1	0.4	0	3.1	2.7	0.4	1.4	33.4	35.3	3.5	1.6	4.2	0.3	0.3	2.5	7.2	0	0	1.5	0	0	0	3.2	1.1	12.5
2000-02-01	16.4	1.5	0.2	11.1	2	3	14.2	1.5	0.6	0	13.9	1.4	0.5	0	1.8	0.4	1.4	0.1	0.6	1.9	0.2	1.5	0.1	0.1	0.5	0	4.6	8.7	0.8	5.3	4.5	15.2	9.8	20.9	10.3	31.1	3.8	2.9	3	9.7	4.6	0	0.2	10.2	0.7	1	1.8	1.9	1.5
2000-02-02	2.3	17.1	7	0.9	0.3	4.3	0	5.8	0	13.9	7.7	4.7	24.3	8.1	0.5	34.4	4.7	20	1.9	0.4	7.3	8.4	21	21	24.3	23.4	25.8	50.6	9.4	31.1	29.1	76.7	41.4	18.8	1.8	0	0	0	0	0.1	27.1	19	1	9.1	0.6	1.4	0.5	0.4	8.4
2000-02-03	36.6	6.3	40.7	35.5	21	5.8	6.7	0.4	2.9	9.8	9.1	0.3	12.2	0.6	1.6	10.2	0.3	1	5.8	2	2.8	0.4	21.2	21.2	12.2	9.3	3.2	5.6	11.6	9	9.1	6	0.3	5.8	0	0.2	0.1	0	1.4	13.1	12.3	2.2	0.3	1.4	0	3.3	1.6	2	0.4
2000-02-04	39.3	13.4	13.8	4.2	0.5	36.8	17.5	1.2	10.6	13.4	1.4	2.9	0	0.1	1.7	0	2.9	0	3.9	1.7	4.5	3.6	0.2	0.2	0	0.1	1.2	0.1	1.5	0.2	0.4	1.1	0.6	5.8	3.7	5.9	5.5	2.5	0.1	0	3.4	5.9	1.9	4	0	0	1.7	1.7	3.6
2000-02-05	0.4	20.4	5.3	1.3	85.3	5.7	1.1	6.5	64.9	22.9	4.6	5.3	2.1	3.7	9.4	1.9	5.3	1	19	9.8	4	4.3	2.9	2.9	2.1	3.9	7.5	6.4	1.7	3.2	3.4	5.8	8.7	1.8	0	0.1	0.1	0.1	15.5	13.4	1.4	0	6.4	3.8	2.3	6.9	9.4	9.8	4.3
2000-02-06	7.9	4.1	13.2	8.8	6.4	0.1	0.7	4.8	0.1	26.1	1	3.9	0.8	1.1	8.3	0.6	3.9	1.8	2.2	7.8	1.8	3.2	1.2	1.2	0.8	1.1	4	7.9	6.5	7	9.4	10.5	11.9	5.2	2.7	2.2	2.5	4.5	7.3	10.5	4.1	3.1	0.2	0	0.5	0.2	8.3	7.8	3.2
2000-02-07	18.8	0.4	0.2	6.6	2.5	0.1	0.9	0	2.5	7.7	0	0	0	0	0	0	0	0	0.4	0	0	0	0	0	0	0	1.4	3.6	3.2	4.5	2.8	4.3	9.1	8.8	3.2	6.4	1.9	3.2	8	7.1	4.6	5.4	2.9	1.7	12.1	5.8	0	0	0
2000-02-08	0.1	0.9	1	0.3	0	0	0.3	0	0.1	0.7	0	0	0.4	0.1	0.1	0.9	0	0.5	0.8	0.1	0.2	0	1	1	0.4	0.2	0	0	0	0.1	0	0	0	0.1	0.1	0.1	0.3	0.1	1.7	1	0.4	7.1	0.5	3.8	0.4	1	0.1	0.1	0
2000-02-09	0	1	0	2.7	0	0.1	0.7	0	0	0.1	0.4	0	0	0.1	0	0	0	0	0	0	0	0	0	0	0	0	0.9	3	1.7	1.4	1.5	2.8	0.3	1.1	0.3	1.6	0.6	0.2	4.2	3.8	0.8	31.2	0.9	0	0.7	3.5	0	0	0
2000-02-10	5	0.3	11.5	4.1	0	0.7	0.6	0	0	7.1	4.9	0.1	14	2.7	0	14.3	0.1	10.9	0	0	2.3	1.5	11.4	11.4	14	7.7	5.7	10.1	4.8	6.6	10.6	10.4	5.3	0.3	1.7	1.3	0.8	0.4	0.9	1.8	1.7	6	0.5	14.2	0	0	0	0	1.5
2000-02-11	20.7	0.2	13.6	2.5	0	0	1.9	0.2	0	9.6	0.1	0.5	0.4	0.8	0	0.1	0.5	0.8	0	0	1.2	0.8	0.8	0.8	0.4	0.6	0.4	0.7	5.3	9.5	4.4	0.1	0	0	1.5	0	0.3	0.2	0	0.3	17.8	2.1	0.4	19.2	12.2	1.7	0	0	0.8
2000-02-12	7.5	28.7	7.7	41.5	1.5	0	1.7	29.6	1.6	24.5	9.7	39.6	13.6	20.1	28.1	10.8	39.6	12.7	1.7	36.2	15.2	41.7	11.7	11.7	13.6	14.4	1	0.6	2.4	25.4	18.9	0.8	1	3	6.4	1	0.4	0.1	8.3	1	7.1	6	4.7	3.5	15.6	3.9	28.1	36.2	41.7
2000-02-13	10.7	12.1	12.1	14.3	29	0.9	9.7	20.7	21.7	5.8	2.6	22.1	2.7	2.8	7.8	3.1	22.1	1.2	10.4	9.4	8.9	13.3	12.1	12.1	2.7	3	6.4	6.7	15.5	3.6	3.5	1.9	0.1	9.7	0.2	3.1	0.9	0	0	1.4	6	1.5	0	0.2	18.9	11.6	7.8	9.4	13.3
2000-02-14	6.2	7.7	1.1	5.5	20.5	26.4	26.4	3.7	31.4	1.3	12	2.4	7.8	6.2	0.3	8	2.4	8.2	5.4	0.2	1.4	0.7	1.9	1.9	7.8	5.1	16.5	10.7	6.1	8.3	4.8	11.9	2.6	8.9	1.3	17.8	17	8.7	7.4	6.3	22.6	0.4	0.4	0	0.2	20.8	0.3	0.2	0.7
2000-02-15	2.1	1.4	2.9	2	1.8	0	5.3	23.2	2.6	0	12.5	19.7	9.4	19.5	59.4	9.9	19.7	16.8	19.6	47.4	17.7	32.2	14	14	9.4	13.1	18	18.6	16.1	9.4	18.4	34.4	21.3	0.9	0.6	0	0.4	0.8	20.9	3.2	4.2	0.2	1.1	8.3	0.3	0.1	59.4	47.4	32.2
2000-02-16	14.4	4.8	18.3	32.8	6.9	0.5	5.5	1.4	2.3	22.8	26.3	1.8	4.4	10.9	2.7	2.2	1.8	8.9	12.9	1.9	7.1	2.2	4.2	4.2	4.4	8	35.7	51.2	26.1	13.8	20.7	53.8	40	16.2	1.5	21	12.7	6.6	0.6	0.7	7.6	0.4	0	0	21.2	1.6	2.7	1.9	2.2
2000-02-17	1.1	3.5	2.9	2.1	37.8	0.2	8.4	2.3	0.1	36.6	1.8	1.6	5.8	0.7	2.3	7.2	1.6	7.3	1.2	2.7	0.3	3.9	3.1	3.1	5.8	1.7	2.6	13.3	3.2	5	4.3	29.5	1.4	14.7	5.5	3.1	0.5	0.2	0	0.2	3.5	0.6	0	0	14.4	13.9	2.3	2.7	3.9
2000-02-18	4.5	4.2	2.7	8.2	0.1	0.1	7.5	0	0.1	1.3	0.5	0	0	0.1	0.2	0	0	0	0	1.1	0	0	0	0	0	0	0.5	3.4	3.3	18	8.8	4.4	3.5	30.7	4.5	0.8	0.1	0.2	0.5	0.4	23.9	7.3	11.2	0	3.5	14.1	0.2	1.1	0
2000-02-19	0.7	5.8	0	0.5	2.2	36.3	1.7	0	7	50.6	1.7	0	0	0	0	0	0	0	0.3	0	0.1	0	0	0	0	0	0	1.8	0.1	0	0	2.5	0.5	2.1	4.1	6.7	8.7	9.2	4	2.9	0	0.7	3	0.2	1.8	1.6	0	0	0
2000-02-20	10	4.8	14.3	6.1	0	0.2	0	0.2	0.1	3	4.1	0.1	0	0.9	1.8	0	0.1	1.1	0	0.3	1.1	0.2	0	0	0	0	2	13.7	0	0	0	0	0	0	0.1	0	0	0	0	49.2	0.3	26.3	1.6	0	2	5.1	1.8	0.3	0.2
2000-02-21	0	0.5	0.7	0	0	0.4	0	2.4	9	0	0	3.5	0.6	0.1	2.2	1.3	3.5	0	0	3.2	1	3.8	2.2	2.2	0.6	0.1	0	1.2	0.2	7.4	1.8	0.6	0	0.8	0	0	0	0	3.1	0	28.6	9.9	5.3	0.1	4	0	2.2	3.2	3.8
2000-02-22	0.1	0	5.1	1.1	0.4	1.9	1.4	0	0	2.6	0	0	2.9	0	0	0	0	0.1	0	0	0	0.7	1.2	1.2	2.9	3.1	0	0	0	0	0	0	0	0	0	0	0	0	48.4	26	0	30	1	2.4	0	0	0	0	0.7
2000-02-23	0	6.3	1.9	1.6	0.3	0.9	0	0	0.6	0.9	0	0	0	0	0.2	0	0	0	0.1	23.7	4.6	0	0	0	0	0	0	0	0	0.3	0.4	0.2	0	0	0	0	0	0	2.7	2	4.2	13.7	13.2	2.4	31.6	21.9	0.2	23.7	0
2000-02-24	0.1	0.6	7.4	0	0.5	0.7	2.1	10.2	8.1	9	3	14.5	13.4	27.7	42.8	10.8	14.5	9.3	45.9	19.5	66	20.8	14.7	14.7	13.4	14.6	0	0.1	0	0.1	0	1.8	4.4	1.5	10.7	0.1	0	1.8	10.3	7.7	0.9	5.2	1.1	2	40.6	33.2	42.8	19.5	20.8
2000-02-25	0.3	3.9	2.5	0.5	2.3	2.7	16.7	56.7	3.7	58	7.2	65.7	49.5	18.2	39.6	46.5	65.7	32.1	34.6	35.1	41.8	59.2	54	54	49.5	41.2	0.8	2.8	0.4	4.4	6.4	2.5	19.3	6	0	0.1	0.3	0.1	0.3	6	2.7	3.6	0	0.6	27	38.5	39.6	35.1	59.2
2000-02-26	4.9	19.4	7.3	5.6	1.2	13	7.3	0.6	2.9	15.7	0	0	0	0	2.7	0	0	0	4.3	0.3	1.2	0	0	0	0	0	2.8	0	0	5.6	0	0	0.1	0.3	0	0	0	0.1	0	0	2.7	3.1	1.3	0.1	0.5	4.7	2.7	0.3	0
2000-02-27	7.7	29.8	0.1	31.1	60.2	1.1	0.5	21.9	64.9	14.1	6.9	23	13.5	13.1	35.9	15.2	23	13.2	24.9	44.9	27.5	37	17.3	17.3	13.5	16.5	0.1	2.8	7.1	3	3.8	0.9	3.3	3.2	5.8	0.1	0	0	5.1	4.1	0.4	0.4	0.2	0	0	0	35.9	44.9	37
2000-02-28	0	0.4	0	0	9.6	1.6	0.1	0.4	8.7	2.5	0.6	0.7	0.1	2.1	0.4	0	0.7	0.4	1.7	0.9	0.5	1.1	0.2	0.2	0.1	1.8	1.7	2.6	12.9	1.3	2.4	0.9	1.2	0.2	0.6	1.2	3.1	5.7	6	6.9	0.6	0	1.5	0.6	7.1	1.5	0.4	0.9	1.1
2000-02-29	0.8	0.8	1	5.6	2	0.3	3.8	0	0.5	9.5	0	0	0	0	0	0	0	0	0	0	0	0	0	0	0	0	12.7	4.7	5.3	8.4	7.2	4.3	1.1	5	2.4	1.6	0.3	5.7	13.4	8.2	11.1	0	4.8	5	3.9	12	0	0	0
2000-03-01	0	2.7	0	1.9	0	0	0.3	0	0	0	0.1	0	0	0	0	0	0	0	0	0	0.5	0.1	0	0	0	0	4.9	2.8	4.9	6.9	4.8	0.6	6.2	34.9	3.4	15.2	2.4	1.5	6.9	7.4	12.6	0	4.1	8	0	6.6	0	0	0.1
2000-03-02	0	0	0	0	0	0.1	0.2	0	0	0	0	0	0	0	0	0	0	0	0	0	0	0	0	0	0	0	0	0.6	6.5	5	3.1	8.5	0	14.9	3.1	3.3	0.9	0.5	0	0	0.1	3.2	12.1	27.4	1.4	5.1	0	0	0
2000-03-03	0	0	1.1	0	2.5	1.4	0	0	0	0	0	0	0	0.1	0	0	0	0	0	0	0	0	0	0	0	0	9	22.3	0.4	0.4	0.7	8.9	0.5	0	17.3	2.8	0.2	0.1	5.5	3.5	0	1.8	0.8	9.4	12.7	0.3	0	0	0
2000-03-04	0	0	0	0.5	0.1	0.1	18.8	0	0	0	1.4	0	5.8	5.8	0	18.1	0	24.9	0	0	0	0	0	0	5.8	2	12	4.9	7	4.6	3	1.9	16.8	15.9	4.2	5.6	2.8	2.5	0	0	7.3	3.9	2.5	20.1	5.3	0	0	0	0
2000-03-05	9.6	17.7	22.3	10.5	0.2	0.8	0.4	0.2	0.3	0	10.9	0.4	0	3.5	0	0.2	0.4	9.6	0.5	0	0	0.3	0	0	0	0	6.4	22.8	16.1	5.4	5	19.9	13.5	2.8	9.8	8.1	2.5	1.5	6.3	0	4.1	0.9	8.7	9.2	0.1	1.3	0	0	0.3
2000-03-06	4	1.7	0	0	0.5	0	0	0	0	0	15.8	0	3.1	1	0	1.2	0	0	0	0	3.2	0.8	7.9	7.9	3.1	5.4	0.4	0.9	4.4	0.2	1.5	11.4	3.6	5.6	0.4	9.2	0.8	1.2	3.2	2.8	1.2	2.3	3.5	3.7	0	0.6	0	0	0.8
2000-03-07	4.9	0	0	8.6	3.3	1.3	0	0	6.6	0.9	0	0	0	5.6	0	0	0	0	0.2	0.1	0	0	0	0	0	0	13.1	6.5	18.9	0.5	1.2	3	38.4	7.9	1.3	56	12.3	5.7	13.2	5.7	0	4.1	4.3	0.2	23.7	2.3	0	0.1	0
2000-03-08	1.6	5.9	9.4	14.8	5.2	0.2	39.9	0	0.7	29.3	1.3	5.9	0	0.8	1.4	0	5.9	4.1	0.9	0.4	1.1	4.1	1.2	1.2	0	0.2	29.9	0	4.7	11.2	5.9	3.8	11.7	16.5	3.8	7.7	1.5	1.7	12.3	7	7.8	0.2	9.6	1.5	0	0	1.4	0.4	4.1
2000-03-09	48.2	7	10.6	80.1	0	0	7.4	0	0	28.6	10.9	0	5.1	0.2	0	0	0	12.9	0	0	1.2	0	0.3	0.3	5.1	6	13.7	0	8.2	9.4	1.8	0	0.6	5.1	1.1	19.4	12.5	6	5.7	5.7	20.3	5.6	3.1	1.7	0	0	0	0	0
2000-03-10	10.8	6.9	3.7	11.6	0.4	0.3	0	0	2.1	6.2	1	0	0.6	0	8.5	0	0	1.3	5.7	2	2.3	0.5	0.8	0.8	0.6	0.8	10.5	4.6	1.4	0.7	0.8	6.5	2.6	1.5	3.4	9.7	7.2	5.9	1.1	0.2	0.1	0	9.4	0	0.9	6.3	8.5	2	0.5
2000-03-11	0	22	1	0	4.9	14	0.2	0.4	0.2	4.4	0.4	2.7	0	0	0.9	0	2.7	0	0.3	2.2	27.4	1.6	0.9	0.9	0	0.5	4.6	18.4	4.4	2.6	7.7	6.7	15.1	2	1.1	24.3	13	5	14.8	1.8	0.7	0	4.7	0.8	0	10.6	0.9	2.2	1.6
2000-03-12	6.6	2	26.5	0.3	33.6	110.5	1.3	28.2	44.3	24.6	5.4	19.6	14.9	5.7	32.1	16.9	19.6	11.8	28.9	42.1	19.7	13	14.3	14.3	14.9	14.4	7.3	7.5	3.8	16.2	15	10.3	5	8.2	2.4	12.5	8.6	3.4	1.7	0.8	15.1	0	30.8	1.1	0	0.3	32.1	42.1	13
2000-03-13	9.3	0.5	21.4	10.7	44	95.6	0.8	7.4	58.1	41.8	1.7	8.2	1.4	3.4	37.1	2.2	8.2	28.1	49	20.9	10.3	8.7	4.8	4.8	1.4	2.3	0.2	12	7	9.9	5.7	22.8	59.8	3.8	1.1	0.8	1.2	1.3	7.6	11	5.2	9.9	18.5	12.1	12.3	0.2	37.1	20.9	8.7
2000-03-14	30.1	4.5	103.8	20	0.1	7.1	0	0	0	2.9	0	0	0	0.3	1	0	0	0	0	2.4	0	0	0	0	0	0	0	0	0.1	6.7	0.7	0.1	0	0	0	0.5	1.6	0.1	0	0	22.7	0.9	9.6	16.6	0	0	1	2.4	0
2000-03-15	31.5	12.7	31.2	19.2	0	0	0.1	0	0	32.1	0	0	0	0	0	0	0	0	0	0	0	0	0	0	0	0.1	0.5	0	0.1	0.4	0.2	0.5	1.9	0	5.1	2.2	3	6.2	5.5	1.3	0.5	3.5	0	0	0.2	0	0	0	0
2000-03-16	1.5	2.2	6.9	0.7	0	0	7.2	0.9	0	5.5	0.1	1.4	2.6	0.4	0	3.7	1.4	1.8	0	0	1.5	1.3	3.6	3.6	2.6	1.8	0.2	0.2	0.3	1.1	0.6	0.7	0	0	0.4	0.4	0	0.2	2.3	2.7	1.6	0	5.6	6	0.6	4.5	0	0	1.3
2000-03-17	5.8	5.2	4.2	2.8	0	0	3.9	0	0	0.7	0	0	0.2	0.3	0	0.1	0	0	0	0	0.6	0.3	1.7	1.7	0.2	0	0	0.1	0	0	0.5	1.4	0.2	0	0.5	6.3	3.7	0.6	24.2	9	0	3.3	1.2	9.7	16.4	3.8	0	0	0.3
2000-03-18	2.5	16.6	0	0.8	0	0	0	0	0.2	1.6	0	0	0	0	0	0	0	0	0	0	0	0	2	2	0	0.2	4.3	1.8	1.5	0	2.9	6.2	12.3	0	2.2	5.8	5.2	5.5	37.2	40.3	0	10.5	3.4	17.9	0.8	1	0	0	0
2000-03-19	1.8	1.6	0.2	2	0	6.2	1.6	3.3	12.8	9.3	0.2	1.2	7.7	0	28.7	9.8	1.2	0.1	40.1	30.7	1.9	0.8	2.4	2.4	7.7	0.8	1.4	1.8	5.4	4.7	1.1	0	5.8	0.1	0	21.6	15.8	1.3	23.5	18.5	2.3	3.3	2.2	15.8	0.3	0.1	28.7	30.7	0.8
2000-03-20	0.5	6	0.1	8.4	0.9	0	0	24.1	0.2	8.7	0	33	0.3	1.5	29.4	2.6	33	4.8	1.9	20.9	13.9	23.9	6.9	6.9	0.3	0.2	0	2.9	5.7	0.1	0.8	11.6	3.3	7.3	2.6	10.6	10.3	2.7	9.8	6.5	2.7	0.4	0	0.7	17.8	0	29.4	20.9	23.9
2000-03-21	1.6	0.4	2.1	0.7	0	1.7	0.8	1.2	0	0.4	1.7	1.4	2.6	0.9	0.2	3.2	1.4	6	0	0.2	0.1	1	1.8	1.8	2.6	1.8	0	0	0	0.1	0.2	0	0	0.5	1.9	0.5	0.2	0.7	2.7	22.7	0.1	7.8	3.6	2.8	0	0.3	0.2	0.2	1
2000-03-22	0	0	0.4	1	0.1	10.4	0.8	0	0.6	0	0.2	0	0.7	2	1.8	0	0	0.5	7.2	0.3	0.8	0	0	0	0.7	1.3	0.9	1.5	0.1	6	6.4	6.8	7.4	19.8	13.1	12.4	9.5	5.1	39.3	56	5.5	2.6	2.5	1.7	0.4	0	1.8	0.3	0
2000-03-23	2.8	1.5	0.4	0.8	13	0	0.7	5.6	0	0	1.7	8.9	1.2	0.1	0	2.8	8.9	8	0	0	2.9	12.2	1	1	1.2	0.1	3.7	5.1	0.1	0.3	0.4	5.1	16.7	1.8	4.3	1.3	2.6	6.7	19	14	0	3.4	0.7	4	0.4	0	0	0	12.2
2000-03-24	0	2.2	0	0	0	0.4	16.5	0.5	0	0	0.7	16.5	0.4	0.6	0	0	16.5	0	4.1	0	48.3	33.2	8	8	0.4	0.2	5.7	18.9	6.8	27.2	42.3	47.1	16.9	33.5	7.1	4.4	7.2	3.7	4.8	21.5	10.9	0.6	7.7	3.3	0	0	0	0	33.2
2000-03-25	6.1	15.3	1.7	0	0	0.7	0.9	0	13.2	0	0.8	0	0	0	0.9	0	0	0	7.6	0	2.1	0	0	0	0	0	2.5	0	0	15.6	18.1	1.5	0	1.9	0	0	0.4	0	1.6	4.7	0	1.2	0.3	5.4	4.8	0.3	0.9	0	0
2000-03-26	15.7	2.2	2.8	0.4	0	1.3	1.4	0	0	5.7	0	0	0	0	0	0.1	0	8.2	0	0	1.7	0	0	0	0	0	1.5	0	0	0	0	0	3.3	0	2.7	3	0	0.2	3.7	2	0	0	0	0	0	0	0	0	0
2000-03-27	0	0	0	0	0.1	2.6	0.1	0	0	4.1	0	0	0	0	0	0	0	0	0	0	0	0	0	0	0	0	0.1	0	0	0	0	1.3	0.1	0	0	15.8	1.5	0.3	4.5	1.3	0.2	0.1	3.7	0.1	0	0	0	0	0
2000-03-28	0.2	0	1.6	0	0	1.5	0	0.1	0	0	0	0.2	0.2	0	0	0.4	0.2	0	0	0	0	0.1	0.5	0.5	0.2	0	0.1	0.1	0	0	0	0.5	0.3	0	0.1	0	0.1	5.9	0.1	0.2	0	3.3	0	0.4	0.1	3.1	0	0	0.1
2000-03-29	2.7	0	1.3	0.8	0	0	0.2	0	0	0	0	0	0	1.2	0	0	0	0	0	0	0	0	0	0	0	0	0	0.3	0	0	0	0	0	0	0	0	0	0	0.6	0	0	0	2	5.5	3.6	0.1	0	0	0
2000-03-30	0	0	0	1	0	0	0	0	0	0	1	0	0	0	0	0	0	0	0	0	0	0	0	0	0	0	0	0.3	2.4	0	0	1.8	3	0.8	2.2	0.5	0.3	2.8	5.2	5.7	2	0	4.3	3.3	0	0	0	0	0
2000-03-31	0	0	0	0	0	3.3	10.3	0	0	3.3	0.4	0	0	0	0	0	0	0	0	0	0.5	0	0	0	0	0	1.6	2.2	0.2	4.4	3.3	0	0	0	0	0	0	0	0.2	0.3	6.3	0.2	2	0	11.8	0	0	0	0
2000-04-01	0	0	0	0.2	4	10.1	0	0	0	0	0	0	0.4	3.9	0	0.4	0	2.6	0	0	2.5	0.3	0.1	0.1	0.4	0.2	0	0.9	0.3	1.9	0.7	1.3	1.4	0.6	2.9	9	0.9	0	0.6	0	6.8	0	3.3	0.3	0	0	0	0	0.3
2000-04-02	0	0	0	0	10.1	5.8	0	0	0	0.3	0.1	0.1	0	1.3	1.6	0	0.1	1.3	0	0.2	1.1	1	0	0	0	0	0	0	0	1.1	0.3	0.5	0.4	0	0.1	4.9	0.6	2.3	0	5	1.3	1.1	0.1	2.6	0	0	1.6	0.2	1
2000-04-03	0	0	0	0	0	0	0	0.5	0	0	0	1.1	0	0	0.1	0	1.1	0	0	0	0	0.3	0	0	0	0	0	0	0.5	0.6	0.4	0	0	1.5	0	0	0.9	0.2	3.1	0.2	1.9	0	1.3	1.9	0	0	0.1	0	0.3
2000-04-04	0	0	0	0	0	0.2	0	0	0	0	0	0	0	0.9	0	0	0	0	0	0	0	0	0	0	0	0	0	1	0	0	0	0	0	0	0	9.2	0	0	0	0	0	0	2.8	0.8	32.7	0	0	0	0
2000-04-05	0	0	0	0	0	28.3	0	0	0	0	0	0	0.7	3.3	0	0	0	1.1	0	0	0	0	0	0	0.7	0.4	0.6	2.8	0.4	0.2	0.3	0.7	0.6	0.5	8.9	10.6	5.4	1	0.2	0.1	0	25.4	1.9	0.2	0	0.2	0	0	0
2000-04-06	0	0	0	0	14.2	59.2	0	0	0	0	0	0	0	0	0	0	0	0.1	0	0	0	0	0	0	0	0	0	0	0	0	0	0.6	2.7	0	1	3.9	3.8	3.2	9	5.7	0	0.3	0	4.9	0	0	0	0	0
2000-04-07	0	0	0	0	0	58.6	0	0	0	0	0	0	0	0	0	0	0	0	0	0	0	0	0	0	0	0	0.2	2.6	0	1.5	0.8	1	3.3	0.5	1.1	4	2.7	4.3	12.2	8.8	0	0	0.2	1.2	0	0	0	0	0
2000-04-08	0	0	0	0	0	77.3	0	0	0	0	0	0	0	0	0	0	0	0	0	0	1.5	0	0	0	0	0	0	0	0	0	0	1.2	0	0	4.1	2.7	3.4	12	5.9	15.5	0	0	0	0.5	0	0	0	0	0
2000-04-09	0	0	0	0	0.5	25.8	0	0	1.3	0	0	0	0	0	0	0	0	0	0.7	0	0.1	0	0	0	0	0	0	0.6	0	0	0	0.4	0.1	0	0.6	21.6	31.4	21.7	13.6	4.5	0	0	0	0	0	0	0	0	0
2000-04-10	0	0	0	0	4.8	28.1	2.4	25.3	0	0	7.1	31.6	26.9	8.3	3.8	78.1	31.6	97.6	2.2	2.3	63.2	34.1	56.2	56.2	26.9	24.9	0.1	0	17.2	6.2	0.7	62	3.4	0	0.1	19.4	7.2	0.1	10.6	3.4	0	0	1	0	0	0	3.8	2.3	34.1
2000-04-11	0	0	0	0	0	0.5	0.2	1.6	0	0	14.5	6.1	9.6	1.6	0	9	6.1	5.6	0	1.1	3.4	14	5.5	5.5	9.6	6.1	3.2	0.2	31.8	15.1	1.6	11.7	26.9	0	0.5	8.2	4.5	0	31.5	4.5	0	0	0	0	0	0	0	1.1	14
2000-04-12	0	0.9	0	0	0	0.7	0	0	0	0	2.2	0	0	0.5	0	0.5	0	1.3	0	0	0	0	0	0	0	0	0	4.2	0	0	0	0	0	0	0	126.8	14.9	0	128.2	17	0	0	0	0	0	0	0	0	0
2000-04-13	0	0.6	0	0	0	0.2	0	0.2	6.9	0	0	0	0	2	0	0.2	0	0	0	0	0	0	0	0	0	0	0	0	0	0	0	0	0	0	0	6.9	0.1	0	0	2.4	0	0.1	0.1	0.1	0	0	0	0	0
2000-04-14	0	0	0	0	0.2	0	0	0	0	0	6.9	0	0	0	0	0	0	0	0	0	0	0	0	0	0	0	7.8	6.5	0.1	0	0	0.8	0	0	3.9	0	0	0.1	0.1	0	0	0	0	0	0	0	0	0	0
2000-04-15	0	0	0	0	0	0.2	11	0	0	0	0.1	0	0	0	0	0	0	0	0	0	0	0	0	0	0	0	0.1	0.6	2.7	21.3	3.1	5	5.6	0	0	0	0	0.1	2.9	0.2	40.1	0	0	0	0	0	0	0	0
2000-04-16	0	0	0	0	0	1.3	0.7	0	0.2	0	0	0	0	0	0	0	0	0	0	0	0	0	0	0	0	0.2	0	0.6	0.5	1.8	0	2.4	1.4	0	0	0	0	0	0	0	46.3	0	0.3	0	0	0	0	0	0
2000-04-17	0	0	0	0	0	0.5	0	0	0	0	0	0	0.1	2.1	0	0	0	0	0	0	0	0	0	0	0.1	0	0	2	0.5	2	0.2	1.7	0	0	0	0	0	0	0	0	31.4	0	0	4.8	0	0	0	0	0
2000-04-18	0	0	0	0	0	0	0	0	0	0	0	0	2.1	1	0	0	0	0	0	0	0	0	0	0	2.1	10.3	0	0	0	0	0	18.1	2.5	0	0	0	0	0	0.4	0	0	0	0	0	0	0	0	0	0
2000-04-19	0	0	0	0	0	1.6	0	0	0	0	0	0	0	2.1	0	0	0	0	0	0	0	0	0	0	0	0	0	0	0	0	0	4.8	0.7	0.8	0	1.2	0	0	2.3	4.4	0	0	0	1	0	0	0	0	0
2000-04-20	0	0	0	0	0	0.2	0	0	0	0	0	0	0	0	0	0	0	0	0	0	0	0	0	0	0	0	0	0	0	0	0	0	0	0	0	0.7	0	0	0.5	1.5	0	0	0	3.9	0	0	0	0	0
2000-04-21	0	0	0	0	0	2.4	0	0	0	0	0	0	0	0	0	0	0	0	0	0	0	0	0	0	0	0	0	0	0	0	0	0	0	0	0	0	0	0	0	0	0	3.7	0.2	0.1	0.4	0.1	0	0	0
2000-04-22	0.4	0.1	0.1	0	0	0.4	0	0	0	17.3	0	0.2	0	0	0	0.1	0.2	0	0	0	0	0	1	1	0	0	0.1	0	0	0	0	0	0	0	0	0	0	0	0	0	0	2	0.1	0	0	0	0	0	0
2000-04-23	0	0.3	0	0	0	0.8	0	0.1	0	0	8.6	0	0.2	0	0	0.6	0	0.1	0	0	0	0	0	0	0.2	0	1.1	0	8.2	3.1	0.9	0	0	0	0	0	0.3	0	5.9	1.1	0	0	0.3	0	0	0	0	0	0
2000-04-24	0	0	0	0	0	5	0	0	0	2.8	0.5	0	0	1.8	0	0	0	1.8	0	0	0	0	0	0	0	0	0	0	0.4	0	0	1.1	0	0	0	0	0	0	1.1	0	4.8	0	0	0	0	0	0	0	0
2000-04-25	0	0	0	0	0	0	0	0	0	0.2	0	0	0	0.2	0	0	0	0	0	0	0	0	0	0	0	0	0	0	0	0	0	5.6	0	0	0	0	0	0	0.3	0.3	1.1	0	0	0	0	0	0	0	0
2000-04-26	0	0	0	0	0	0.4	0	0	0	0	0	4.2	0	0.1	0	0	4.2	0	0	0	0	9.3	4.3	4.3	0	0	0.2	0	0	0	0	5.8	0	0	0	0	0	0	0	0.7	0	0	0	0	0	0	0	0	9.3
2000-04-27	0	0	0	0	0	2.2	0	0	0	0	0	0	0	0	0	0	0	0	0	0	0	0	0	0	0	0	0.4	0	0	0	0	2.7	0	0	0	0	0	0	1.7	0	0	0	0	0	0	0	0	0	0
2000-04-28	0	0	0	0	0	2.6	0	0	0	0	0.6	0	0	13.3	0	0	0	0	0	0	18	0	0	0	0	0	2.3	0.5	0.8	4.6	3.6	2.1	0	0	0	0	0	0	0	8.2	6.6	0	2.5	0	0	0	0	0	0
2000-04-29	0.1	0.2	0	1.8	4.6	3.1	0	0	0	0	13	0	0	0	0	0	0	0	0	0	0.1	0.3	1.1	1.1	0	0	0	0	0	0	0	0	0	0	0	0	0	0	15.6	6.3	0	0	2.6	0	0	0	0	0	0.3
2000-04-30	0.1	0.2	0	0	0	0	0	0	0	0	0	0	0	0	0	0	0	0	0	0	0.6	0	0	0	0	0	0	0	0	0	0	0	0	0	0	0	0	0	1.8	6.8	0	0	0	0	0	0	0	0	0
2000-05-01	0	0	0	0	0	0	0	0	0	0	0	0	0	0	0	0	0	0	0	0	0	0	1.8	1.8	0	0	0	0.5	0	0	0	0	0	0	0	0	0	0	1.1	0	0	0	0	0	0	0	0	0	0
2000-05-02	0	0	0	0	0	0	0	0	0	0	0	0	0	0	0	0	0	0	0	0	0	0	0	0	0	0	1.9	1.5	0	0	0	2.4	0	0	0	0	0	0	0	0	0	0	0	0	0	0	0	0	0
2000-05-03	0	0	0	0	0	0	0	0	0	0	0	0	0	6	0	0	0	0	0	0	0	0	0	0	0	0	0	4.8	0	0	0	0	0	0	0	0	0	0	0	1.8	0	0	0	0	0	0	0	0	0
2000-05-04	0	0	0	0	0.5	0	0	0	0	0	0	0	0	5.6	0	0	0	0	0	0	0	0	0	0	0	0	0	0	0	0	0	0	0	0	0	0	0	0	0	0	0	3.9	0	0	2.8	3.7	0	0	0
2000-05-05	0	0.2	0.1	0	41.4	15.8	0	0	1.6	4.9	0.2	0	0	0	0	0	0	0.1	0	0	0	0	0	0	0	0	0	0	0	0	0	1.3	0	0	0	0	0	0	0	0	0	7	0	0.5	0.7	2.6	0	0	0
2000-05-06	0.1	0.3	0	0.4	14.8	26.5	0	0.8	7	0.3	0	0	0	2.1	0.1	0	0	1.4	0	0.8	0	0	0	0	0	0	4.7	0	0	0	0	5.2	0	0	0	0	0	0	0	0	0	0	0	0	0	0.1	0.1	0.8	0
2000-05-07	0	0	1.7	0	20.8	97.9	0	0	9.4	0	0	12	0	1	0	0.9	12	0	0	0	59.9	15	22.4	22.4	0	0	0.3	0	0	0	0	0.3	0	0	0	0	0	0.3	0	0	0	0	0	0	0	0	0	0	15
2000-05-08	0	0	0	0	4.4	27.5	0	0	1.5	0	0	2.1	0	0	0	0.2	2.1	0	0	0	10	2.7	4	4	0	11.2	0	0	0	0	0	0	0	0	0	0	0	0	0	0	0	0	0	0	0	0	0	0	2.7
2000-05-09	0	0.1	0	0	0	4.5	0	0	0	0	0	0	0	0	0	0	0	0	0	0	0	0	0	0	0	0	0	0	0	0	0.1	1.3	0	0	0	0	0.3	0.4	0	0	0	0	0	0	3.2	0.2	0	0	0
2000-05-10	0	0	0	0	4	5	0	0	5.9	0	0	0.1	0	0.2	0.1	0	0.1	0	9	1.4	0.1	0.2	0	0	0	0	0	0	0	0	0	4.5	0	0	0	0	0	0	0	0	0.6	0	0	0	0	0	0.1	1.4	0.2
2000-05-11	0	0	0	0	5.8	8	0	0	0	0	0	0	0	0.7	0	0	0	0	0.7	0.1	0	0	0	0	0	0	1.4	9.1	0	0	0	1.9	0	0	0	0	0	0	7.7	0	0	0	0	0	0	0	0	0.1	0
2000-05-12	0	0	0	0	1.3	10.6	0	0	0	0	0	0	0	0	0	0	0	0	0	0	0	0	0	0	0	0	0	0	0	0	0	2.4	0	0	0	0	0	0	0	0	0	0	0	0	0	0	0	0	0
2000-05-13	0	0	0	0	0	10.2	0	0	0	0	0	0	0	0	0	0	0	0	0	0	0	0	0	0	0	0	0	0	0	0	0	0	0	0	0	0	0	0	0	0	0	0	0	0	0	0	0	0	0
2000-05-14	0	0	0	0	0	0	0	0	0	0	0.4	0	0	0	0	0	0	0	0	0	0	0	0	0	0	0	1	0	0	0	0	0	0	0	0	0	0	0	0	0	0	0	0	1.3	0	0	0	0	0
2000-05-15	0	0	0	0	0	0	0	0	0	0	3.7	0	0	9.3	0	0	0	0	0	0	0	0	0	0	0	0	10.2	0	0	0	0	0	0	0	0	0	0	0	0	0	0	0.1	0.3	0.1	0.8	1.1	0	0	0
2000-05-16	0	0	0	0	0	0	0	0	0	0	0	0	0	2	0	0	0	0	0	0	0	0	0	0	0	0	15.3	0	0	0	0	0	0	0	0	0.2	0	0	0	0	0	0	0	0	0	0	0	0	0
2000-05-17	0	0	0	0	0	1.8	0	0	0	0	0	0	0	0.1	0	0	0	0	0	0	0	0	0	0	0	0	4.7	0	0	0	0	0	0	0	0	0	0	0	3.5	0	0	0	0	0	0	0	0	0	0
2000-05-18	0	0	0	0	0	2.2	0	0	0	0	0	0	0	1	0	0	0	0	0	0	2.1	0	0	0	0	0	6.2	0	1.8	0	0	3.5	0	0	0	0	0	0	0	0	0	0	0	0	0	0	0	0	0
2000-05-19	0	0	0	0	0	0	0	0	0	0	0	0	0	0	0	0	0	0	0	0	4.6	0	0	0	0	0	0.2	2.2	0	0	0	4.8	0	0	0	0	0	0	0	0	0	0	0	0	0	0	0	0	0
2000-05-20	0	0	0	0	0	0	0	0	0	0	0.4	0	0	0	0	0	0	0	0	0	0	0	0	0	0	0	0	4.4	0	0	0	0	0	0.1	0	0	0	0	0	0	0	0	0	0	0	0	0	0	0
2000-05-21	0	0	0	0	0.1	0	0	0	0	0	0	0	0	0	0	0	0	0	0	0	0	0	0	0	0	0	0	0	0	0	0	0	0	0	0	0	0	0	0	0	0	0	0	0	0	0	0	0	0
2000-05-22	0	0	0	0	0	0.3	0	0	0	0	0	0	0	0	0	0	0	0	0	0	0	0	0	0	0	0	0	0	0	0	0	0	0	0	0	0	0	0	0	0	0	0	0	0	0	0	0	0	0
2000-05-23	0	0	0	0	0	0	0	0	0	0	0	0	0	0	0	0	0	0	0	0	0	0	0	0	0	0	5.3	0	0	0	0	0	0	0	0	2.4	0	0	0	0	0	0	0	0	0	0	0	0	0
2000-05-24	0	0	0	0	0.3	3.4	0	0	0	0	0	0	0.3	2.8	0	1	0	0	0	0	0	0	0	0	0.3	0	10.7	7.5	0	0	0	3.5	2.2	0	0	0	0	0	0	0	0	0	0	0	0	0	0	0	0
2000-05-25	0	0	0	0	0	3.1	0	0	0	0	0	0	0	15.3	0	0	0	3	0	0	0	0	1.4	1.4	0	2.5	4.5	0	0	0	0	8.8	4.7	0	0	0	0	0	0	0	0	0	0	0	0	0	0	0	0
2000-05-26	0	0.2	0	0	0	1.7	0	0.9	0	0	0	0	0	1.8	0	0.4	0	0	0	0	0	1.4	2.9	2.9	0	1.9	6.1	0	0	0	0	0	0	0	0	0	0	0	0	0	0	0	0	0	0	0	0	0	1.4
2000-05-27	0	0.4	0	0	0	9.3	0	8.3	0	0	0	4.8	4.2	6.4	0	0.1	4.8	0	0	0	0	0	12	12	4.2	16	0.9	0.6	0	0	0	0	0	0	0	0	0	0	17.9	0	0	0	0	0	0	0	0	0	0
2000-05-28	0	0.1	0	0	0	11.2	0	0	0	0	0	0	0.2	0.7	0	0	0	0	0	0	0	0	4.2	4.2	0.2	5	7.9	1.5	0	0	0	2.9	0	0	0	0	0	0	11.2	0	0	0	0	0	0	0	0	0	0
2000-05-29	0	0	0	0	0	0.1	0	0	0	0	0	0	0	0	0	0	0	0	0	0	0	0	0	0	0	0	9	6	0	0	0	0	0	0	0	0	0	0	10.2	0	0	0	0	0	0	0	0	0	0
2000-05-30	0	0	0	0	0	0	0	0	0	0	0	0	0	0	0	0	0	0	0	0	0	0	6.3	6.3	0	0	0	0	0	0	0	13.2	0	0	0	0	0	0	8.3	0	0	0	0	0	0	0	0	0	0
2000-05-31	0	0	0	0	0	0	0	0	0	0	0	0	0	0	0	0	0	0	0	0	0	0	0	0	0	0	2.3	0	0	0	0	5.7	0	0	0	0	0	0	1.4	0	0	0	0	0	0	0	0	0	0
2000-06-01	0	0	0	0	0	0	0	0	0	0	0	0	0	0.5	0	0	0	0	0	0	0	0	0	0	0	0	4	0	0	0	0	9.1	0	0	0	0	0	0	17.4	0	0	0	0	0	0	0	0	0	0
2000-06-02	0	0	0	0	0	2	0	0	0	0	0.5	0	0	16.6	0	0	0	0	0	0	0	0	0	0	0	0	5.3	2	0	0	0	0.6	0	0	0	0	0	0	0	0	0	0	0	0	0	0	0	0	0
2000-06-03	0	0	0	0	0	0	0	0	0	0	0	0	0	0	0	0	0	0	0	0	0	0	0	0	0	0	2.2	1.2	4.2	0	0	0	0	0	0	4.7	0	0	3.6	0	0	0	0	0	0	0	0	0	0
2000-06-04	0	0	0	0	0	0	0	0	0	0	0	0	0	0	0	0	0	0	0	0	0	0	0	0	0	0	0.4	4.2	0.1	0	0	0	0	0	0	0	0	0	0	0	0	0	0	0	0	0	0	0	0
2000-06-05	0	0	0	0.1	0	0.6	0	0	0	0	0	0	0	0	0	0	0	0	0	3.1	1.5	0	0	0	0	0	1.7	1.1	0	0	0	0	0	0	0	0	0	0	0	0	0	0	0	0	0	0	0	3.1	0
2000-06-06	0	0	0	0.1	0.3	1.2	0	0	0	0	0	0	0	0.6	0	0	0	0	0	0	4.8	0	0	0	0	0	0	16	0	0	0	0	0	0	0	0	0	0	0	0	0	0	0	0	0	0	0	0	0
2000-06-07	0.4	0.3	0.2	0.2	0	0.8	0	0	0	1.2	0	0	0	1.9	0	0	0	0	0	0	0	0	0	0	0	0	0	0.5	0	0	0.2	0.8	0.1	0	0	0	0	0	0	0	0	0	0	0	0.7	0	0	0	0
2000-06-08	0.2	0	0.1	0	0	0	0	0	0	0.2	0	0	0	1.6	0	0	0	0	0	0	0	0	0	0	0	0	0	0	0	0	0	0	0	0	0	0	0	0	0	0	0	0	0	0	0	0.2	0	0	0
2000-06-09	0	0	0	0	0	2.4	0	0	0	0	0	0	0	4.4	0	0	0	0.1	0	0	0	0	0	0	0	0	3	3.4	0	0	0	0	0.4	0	0	0	0	0	0	0	0	0	0	0	0	0.7	0	0	0
2000-06-10	0	0	0	0	0	1.8	0	0	0	1.2	0	0	0	2.5	0	0	0	0	0	0	0	0	0	0	0	0	0	0	0	0	0	6.9	0	0	0	0	0	0	0	0	0	0	0	0	0	0	0	0	0
2000-06-11	0	0	0	0	0	0	0	0	0	0.1	5.8	0	0	18	0	0	0	10.4	0	0	0	0	0	0	0	0	0.6	1.3	1.1	0	0	0.3	0.1	0	0	0	0	2.1	0	0	0	0	0	0	0	0	0	0	0
2000-06-12	0	0	0	0	0	14.1	0	0	0	0	0	0	1.7	26.9	0	1	0	6.1	0	0	0	0	0	0	1.7	2.3	6	12.5	1.6	0	0	1.2	0	0	0	0	0.5	0	0	0	0	0	0	0	0	0	0	0	0
2000-06-13	0	0	0	0	0.6	1.7	0	0	0	0	0	0	0	8.3	0	0	0	0	0	0	0	0	0	0	0	0	6.7	2.7	0	0	0	0	0	0	0	0	0	0	0	0	0	0	0	0	0	0	0	0	0
2000-06-14	0	0	0	0	0	4.2	0	0	0	0	0	0	0	0	0	0	0	5.6	0	0	1.2	0	0	0	0	0	0	0.5	0	0	0	0	0	0	0	0	0	0	0	0	0	0	0	0	0	0	0	0	0
2000-06-15	0	0	0	0	0	1	0	0	0	0	0.5	0	0	29.1	0	0	0	0	0	0	0	0	0	0	0	0	0	5.1	0	0	0	1.7	0	0	0	0	0	0	8	0	0	0	0	0	0	0	0	0	0
2000-06-16	0	0	0	0	0	10.2	0	0	0	0	0	0	0	12	0	0	0	0	0	0	0	0	0	0	0	0.7	0	3.3	0	0	0	0.6	0	0	0	0	0	0	0	0	0	0	0	0	0	0	0	0	0
2000-06-17	0	0	0	0	0	0	0	0	0	0	1	0	0.3	0.7	0	0	0	0	0	0	0	0	0	0	0.3	0.3	0	0	0	0	0	0	0	0	0	0	0	0	0	0	0	0	0	0	0	0	0	0	0
2000-06-18	0	0	0	0	0	1	0	0	0	0	4.1	0	0	0	0	0	0	0	0	0	0	0	0	0	0	0	0.3	0	0	0	0	0	0	0	0	0	0	0	0	0	0	0	0	0	0	0	0	0	0
2000-06-19	0	0	0.1	0	0	2.3	0	0	0	0	0	0	0	0	0	0	0	0	0	0	0	0	0	0	0	0	0	0	0	0	0	0.3	0.7	0	0.1	0	0	0	0	0	0	0	0	0	0	0	0	0	0
2000-06-20	0	0	0	0	0	0	0	0	0	0	0.1	0	0	15.4	0	0	0	0	0	0	0	0	0	0	0	0	0	0.9	0	0	0	6.6	0	0	0	0	0	0	0	0	0	0	0	0	0	0	0	0	0
2000-06-21	0	0	0	0	0	7.1	0	0	0	0	0	0	0	0	0	0	0	0	0	0	0	0	0	0	0	0	1.5	0	0	0	0	2	0	0	0	0	0	0	15	0	0	0	0	0	0	0	0	0	0
2000-06-22	0	0	0	0	0	3.5	0	0	0	0	0	0	0	0	0	0	0	0	0	0	0	0	0	0	0	0	1.3	0	0	0	0	0	0	0	0	0	0	0	2.2	0	0	0	0	0	0	0	0	0	0
2000-06-23	0	0	0	0	0	0.6	0	0	0	0	0	0	0	0	0	0	0	0	0	0	0	0	0	0	0	0	0	19	0	0	0	0.8	0	0	0	0	0	0	0	0	0	0	0	0	0	0	0	0	0
2000-06-24	0	0	0	0	0	0	0	0	0	0	9.6	0	0	0	0.4	0	0	0	0.2	0	0	0	0	0	0	0	0	0	0	0	0	0	0	0	0	0	0	0	0	0	0	0	0	0	0	0	0.4	0	0
2000-06-25	0	0	0	0	5.4	3.3	0	0	0.1	0	0	0	0	0	0	0	0	0	0.1	0	0	0	0	0	0	0	0.1	1.4	0	0	0	1.4	0	0.2	0	0	0	0	0	0	0	0	0	0	0	0	0	0	0
2000-06-26	0	0	0	0	0	1.7	0	0	0	0	0	0	0	0	0	0	0	0	0	0	0	0	0	0	0	0	1.8	0	0	0	0	4.9	0	0	0	0	0	0	8	0	0	0	0	0	0	0	0	0	0
2000-06-27	0	0	0	0	0	1	0	0	0	0	0	0	0	0	0	0	0	0	3	0	0	0	0	0	0	0	4.6	0	0	0	0	0	0	0	0	0	0	0	0	0	0	0	0	0	0	0	0	0	0
2000-06-28	0	0	0	0	0.2	0	0	0	0	0	0	0	0	0	0	0	0	0	0	0	0	0	0	0	0	0	0	17.1	0	0	0	3.4	0	0	0	0	0	0	2.6	0	0	0	0	0	0	0	0	0	0
2000-06-29	0	0	0	0	0	0.8	0	0	0	0	0	0	0	0.6	0	0	0	0	0	0	0	0	0	0	0	0	0	7.3	0	0	0	3	0	0	0	0	2.6	0	9.1	0	0	0	0	0	0	0	0	0	0
2000-06-30	0	0	0	0	0.6	0	0	0	1.8	0	0.6	0	0	1.9	0	0	0	0	0	0	0	0	0	0	0	0	0.9	0.1	0	0	0	0.5	0	0	0	0	0	0	8.6	0	0	0	0	0	0	0	0	0	0
2000-07-01	0	0	0	0	0.9	3.3	0	0	0	0	0	0	0	0	0	0	0	0	0	0	0	0	0	0	0	0	1.1	0	0	0	0	2.2	0	0	0	0	0	0	2.5	0	0	0	0	0	0	0	0	0	0
2000-07-02	0	0	0	0	0.1	1.8	0	0	1.5	0.2	0	0	0	2.4	0	0	0	0	0	0	0.7	0	0	0	0	0	0	0	0	0	0	0	0	0	0	1.3	0	0	0	0	0	0	0	0	0	0	0	0	0
2000-07-03	0	0	0	0	20	4.6	0	14.5	19	0.1	0	7.2	0.1	1.6	25	0	7.2	0	24.1	25.1	0.6	1.3	0	0	0.1	0.4	0	0.3	0	0	0	0.1	0	0	0	0	0	0	0	0	0	0	0	0	0	0	25	25.1	1.3
2000-07-04	0	0	0	0	0	2.1	0	0	0	0	0.4	0	0	0.2	0.8	0	0	0	2	0.7	2	0	0	0	0	0	0	0	0	0	0	0	0	0	0	0	0	0	0	0	0	0	0	0	0	0	0.8	0.7	0
2000-07-05	0	0.1	0	0	0	8.3	0	0	0.8	0	0	0	0	2.4	0	0	0	0	0.1	0	3.7	0	0	0	0	0	4.9	0	2.5	0	0	0.9	17.1	0	0	12	1.6	0	0	0	0	0	0	0	0	0	0	0	0
2000-07-06	0	0	0	0	0.6	1.9	0	0	0	0	0	0	0	0	0	0	0	0	0	0	0	0.1	0.6	0.6	0	1	3.8	0.1	0	0	0	0.1	0	0	0	0	0	0	0	0	0	0	0	0	0	0.1	0	0	0.1
2000-07-07	0	0	0	0	26.2	8.5	0	0	1.7	0	0	0	0	0	0	0	0	0	0.2	0.1	0	0	0	0	0	0	0	0	0	0	0	0.2	0	0	0	0	0	0	0	0	0	0	0	0	0	0	0	0.1	0
2000-07-08	0	0	0	0	0.9	10.3	0	0	3.6	0	0	0.2	0	0	0.2	0	0.2	0	0.8	0.3	0.2	0.1	0	0	0	0	3	0.6	0	0	0	0.7	0	0	0	0	0	0	0	0	0	0	0	0	0	0	0.2	0.3	0.1
2000-07-09	0	0	0	0	0	5.3	0	0	0	0	0	0	0	0	0	0	0	0	0	0	0	0	0	0	0	0	0.6	0	0	0	0	0	0	0	0	0	0	0	0	0	0	0	0	0	0	0	0	0	0
2000-07-10
2000-07-11	0	0	0	0	0	0	0	0	0	0	0	0	0	0	0	0	0	0	0	0	0	0	0	0	0	0	0	0	0	0	0	0	0	0	0	1.7	0	0	0	0	0	0	0	0	0	0	0	0	0
2000-07-12	0	0	0	0	0	8.9	0	0	0	0	0	0	2	0	0	0	0	0	0	0	0	0	0	0	2	0	0	0	0	0	0	3.6	0	0	0	0	0	0	2.9	0	0	0	0	0	0	0	0	0	0
2000-07-13	0	0	0	0	0	0	0	0	0	0	0	0	0	0	0	0	0	0	0	0	0	0	0	0	0	0	0	0	0	0	0	5.8	0	0	0	0	0	0	2.2	0	0	0	0	0	0	0	0	0	0
2000-07-14	0	0	0	0	0	2.2	0	0	0	0	0	0	0	0	0	0	0	0	0	0	0	0	0	0	0	0	0.8	2.4	0	0	0	0	13.7	0	0	0	0	0	0	0	0	0	0	0	0	0	0	0	0
2000-07-15	0	0	0	0	0	0	0	0	0	0	0	0	0	0	0	0	0	0	0	0	0	0	0	0	0	0	0.7	0	0	0	0	0	0	0	0	0	0.1	0	0.8	0	0	0	0	0	0	0	0	0	0
2000-07-16	0	0	0	0	0	0	0	0	0	0	0	0	0	0	0	0	0	0	0	0	0	0	0	0	0	0	2.5	0.7	0	0	0	0	0	0	0	0	0	0	0	0	0	0	0	0	0	0	0	0	0
2000-07-17	0	0	0	0	0	0	0	0	0	0	0	0	0	0	0	0	0	0	0	0	0	0	0	0	0	0	0	0	0	0	0	0	0	0	0	0	0	0	0	0	0	0	0	0	0	0	0	0	0
2000-07-18	0	0	0	0	0	0	0	0	0	0	0	0	0	0	0	0	0	0	0	0	0	0	0	0	0	0	0	0	0	0	0	0	0	0	0	0	0	0	0	0	0	0	0	0	0	0	0	0	0
2000-07-19	0	0	0	0	0	0	0	0	0	0	5.9	0	0	3.7	0	0	0	0	0	0	0	0	0	0	0	0	1.7	0.4	0.7	0	0	7.6	0	0	4.2	0	0	0	2	0	0	0	0	0	0	0	0	0	0
2000-07-20	0	0	0	0	0	22.9	0	0	0	0	3.9	0	0	27.6	0	0	0	0	0	0	0	0	0	0	0	0	13.3	0	0	0	0	6.8	0	0	0.8	0	0.9	0	2.1	0	0	0	0	0	0	0.1	0	0	0
2000-07-21	0	0	0	0	0	2.8	0	0	0	0	0	0	0	0	0	0	0	0	0	0	0	0	0	0	0	0	0	14.5	0	0	0	0	4.1	0	1.2	0	0	0	4.2	0	0	0.1	0	0	0	0	0	0	0
2000-07-22	0	0	0	0	0	0	0	0	0	0	3.6	0	0.1	0	0	0.1	0	0.4	0	0	0.5	0	0	0	0.1	0	2.8	6.9	0	0	0.1	3	0	0	0	0	0	0.4	4.2	0.4	0	0	0	0	0	0	0	0	0
2000-07-23	0	0	0	0	0.5	0	0	0	0	0	0.1	0	0	0	0	0	0	0	0	0	6.8	0	0	0	0	0	0.9	18.9	3.8	0	0	0	0	0	0	0	0	0	0	0	0	0	0	0	0	0	0	0	0
2000-07-24	0	0	0	0	0	0	0	0	0	0	0	0	0	0	0	0	0	0	0	0	0	0	0	0	0	0	6.4	0	0	0	0	0	0	0	0	0	0.7	0	1.2	0	0	0	0	0	0	0	0	0	0
2000-07-25	0	0	0	0	0	0	0	0	0	0	0	0	0	0	0	0	0	0	0	0	1.1	0	0	0	0	0	1.5	0	0	0	0	0	0	0	0	0	0	0	0	0	0	0	0	0	0	0	0	0	0
2000-07-26	0	0	0	0	0	0.1	0	0	0	0	0	0	0	0	0	0	0	0	0	0	0	0	0	0	0	0	10	2.8	0	0	0	0	0	0	0	0	0	0	0	0	0	0	0	0	0	0	0	0	0
2000-07-27	0	0	0	0	0	1.2	0	0	0	0	0.1	0	0	10.1	0	0	0	0	0	0	0	0	0	0	0	0	3.8	14	0	0	0	0.9	0	0	0	0	0	0	0	0	0	0	0	0	0	0	0	0	0
2000-07-28	0	0	0	0	0	4.8	0	0	0	0	0	0	0	3.6	0	0	0	0	0	0	0	0	0	0	0	0	6.1	4.2	0	0	0	7.3	0	0	0	0	0	0	4.3	0	0	0.1	0	0	0	0	0	0	0
2000-07-29	0	0	0	0	0	0.4	0	0	0	0	0	0	0	0	0	0	0	0	0	0	0	0	0	0	0	0	1.4	0.9	0	0	0	4	0	0	0	0	0.1	0	7.2	0	0	0	0	0	0	0	0	0	0
2000-07-30	0	0	0	0	0	0	0	0	0	0	0	0	0	0	0	0	0	0	0	0	0	0	0	0	0	0	6.9	1.4	0.4	0.7	0.1	0	0	0	0	0	0	0	1.5	0	0	0	0	0	0	0	0	0	0
2000-07-31	0	0	0	0	0	0	0	0	0	0	0	0	0	3.5	0	0	0	0	0	0	0	0	0	0	0	0	5.8	0	0	0	0	0	0	0	0	0	0	0	0	0	2.6	0	0	0	0	0	0	0	0
2000-08-01	0	0	0	0	0	0	0	0	0	0	0	0	0	14.8	0	0	0	0	0	0	0	0	0	0	0	0	1.4	0	0	0	0	0	0	0	0	6.4	0	0	0	0	1.2	0	0	0	0	0	0	0	0
2000-08-02	0	0	0	0	0	0	0	0	0	0	0	0	0	0	0	0	0	0	0	0	0	0	0	0	0	0	0	0	0	0	0	0	0	0	0	13.8	0	0	0	0	0	0	0	0	0	0	0	0	0
2000-08-03	0	0	0	0	0	0	0	0	0	0	0	0	0	0	0	0	0	0	0	0	0	0	0	0	0	0	0	0	0	0	0	0	0	0	0	0	0	0	0	0	0.3	0	0	0	0	0	0	0	0
2000-08-04	0	0	0	0	0	0.7	0	0	0	0	0	0	0	0	0	0	0	0	0	0	0	0	0	0	0	0	0	0	0	0	0	0	0	0	0	0	1.2	0	0.5	0	0	0	0	0	0	0	0	0	0
2000-08-05	0	0	0	0	0	0.6	0	0	0	0	0	0	0	0	0	0	0	0	0	0	0	0	0	0	0	0	0.7	0	0	0	0	1.3	0	0	0	0	0.2	0	0.5	0	0	0	0	0	0	0	0	0	0
2000-08-06	0	0	0	0	0	0.4	0	0	0	0	0	0	0	0	0	0	0	0	0	0	0	0	0	0	0	0	2.1	0	0	0	0	11.1	0	0	0	0	0	0	0	0	0	0	0	0	0	0	0	0	0
2000-08-07	0	0	0	0	0	1.1	0	0	0	0	0	0	0	0	0	0	0	0	0	0	0	0	0	0	0	0	0	0	0	0	0	3.9	0	0	0	0	2.1	0	2.8	0	0	0	0	0	0	0	0	0	0
2000-08-08	0	0	0	0	0	0.3	0	0	0	0	0.5	0	0	0.2	0	0	0	0	0	0	0	0	0	0	0	0	1.1	0	0	0	0	10.6	0	0	0	0	0.4	0	0.8	0	0	0	0	0	0	0	0	0	0
2000-08-09	0	0	0	0	0	0.8	0	0	0	0	0	0	0	0	0	0	0	0	0	0	0	0	0	0	0	0	0.6	1.4	0	0	0	0.6	0	0	0	0	0	0	0	0	0	0.1	0	0	0	0	0	0	0
2000-08-10	0	0	0	0	0	0	0	0	0	0	0	0	0	0	0	0	0	0	0	0	0	0	0	0	0	0	0	0	0	0	0	7.1	0	0	0	0	0	0	0	0	0	0	0	0	0	0	0	0	0
2000-08-11	0	0	0	0	0	1.2	0	0	0	0	0	0	0	0	0	0	0	0	0	0	0	0	0	0	0	0	0	0	0	0	0	0.3	0	0	1.1	0	0	0	1.6	0	0	0.1	0	0	0	0	0	0	0
2000-08-12	0	0	0	0	0	1	0	0	0	0	0	0	0	0	0	0	0	0	0	0	0	0	0	0	0	0	3.2	0	0	0.1	0.3	8.2	0	0.1	0.2	0	0	0	0	0	0	0.2	0	0	0	0	0	0	0
2000-08-13	0	0	0	0	0.2	1.7	0	0	0.2	0	0	0	0	0	0	0	0	0	0	0	0	0	0	0	0	0.1	3	0	0	0	0	0.2	0	0	0	0	1	0	0	0	0	0	0	0	0	0	0	0	0
2000-08-14	0	0	0	0	0	0	0	0	0	0	0	0	0	0	0	0	0	0	0	0	0	0	0	0	0	0	2.4	0	0	0	0	0.1	4.3	0	0	0	1.4	0	0.8	0	0	0	0	0	0	0	0	0	0
2000-08-15	0	0	0	0	0	0	0	0	0	0	0	0	0	0	0	0	0	0	0	0	0	0	0	0	0	0	2.4	0	0	0	0	4.7	0	0	0	0	0.4	0	1.1	0	0	0.1	0	0	0	0.2	0	0	0
2000-08-16	0	0	0	0	0	0	0	0	0	0	0	0	0	0	0	0	0	0	0	0	0	0	0	0	0	0	0	0	0	0	0	0	0	0	0	0	0.2	0	0	0	0	0	0	0	0	0	0	0	0
2000-08-17	0	0	0	0	0	0	0	0	0	0	0.2	0	0	3.3	0	0	0	0	0	0	0	0	0	0	0	0	0.2	0	0	0	0	0	0	0	0.6	0	0	0	0	0	0	0	0	0	0	0	0	0	0
2000-08-18	0	0	0	0	0	1.2	0	0	0	0	0	0	0	0	0	0	0	0	0	0	0	0	0	0	0	0	2	0	0	0	0	1.3	0	0	0	0	0	0	0	0	0	0	0	0	0	0	0	0	0
2000-08-19	0	0	0	0	0	0.3	0	0	0	0	0	0	0	0.4	0	0	0	0	0	0	0	0	0	0	0	0	1.6	0	0	0	0	0.5	0.2	0	0	0	0	0	0	0	0	0	0	0	0	0	0	0	0
2000-08-20	0	0	0	0	0	0	0	0	0	0	0.2	0	0	0	0	0	0	0	0	0	1	0	0	0	0	0	0	0.4	0.1	0	0	0	0	0	0	0	0	0	0.4	0	0	0	0	0	0	0	0	0	0
2000-08-21	0	0	0	0	0	0	0	0	0	0	0	0	0	0	0	0	0	0	0	0	0	0	0	0	0	0	0	0	0.1	0	0	2.9	0	0	0	0	0	0	0	0	0	0	0	0	0	0	0	0	0
2000-08-22	0	0	0	0	0	15.9	0	0	0	0	0	0	0	0.1	0	0	0	0	0	0	0	0	0	0	0	0	0.1	0.3	0.1	0	0	0.1	0	0	0	0	0	0	0.7	0	0	0	0	0	0	0	0	0	0
2000-08-23	0	0	0	0	0	0.5	0	0	0	0	0	0	0	0	0	0	0	0	0	0	0	0.1	0.2	0.2	0	0.2	1.4	0	0	0	0	0	0	0	0	0	0	0	0	0	0	0	0	0	0	0	0	0	0.1
2000-08-24	0	0	0	0	0	0	0	0	0	0	0	0	0	0	0	0	0	0	0	0	0	0	0.1	0.1	0	0	1.9	0	0	0	0	0	0	0	0	0	0	0	0	0	0	0	0	0	0	0	0	0	0
2000-08-25	0	0	0	0	0	0.3	0	0	0	0	0	0	0	0	0	0	0	0	0	0	0	0	0	0	0	0	0	1.3	0	0	0	1	0	0	0	0	0	0	0	0	0	0.1	0	0	0	0	0	0	0
2000-08-26	0	0	0	0	0	0.6	0	0	0	0	0	0	0	0	0	0	0	0	0	0	0	0	0	0	0	0	0	0.3	0	0	0	0	0	0	0	0	0	0.1	0.1	0	0	0	0	0	0	0	0	0	0
2000-08-27	0	0	0	0	0	0.1	0	0	0	0	0	0	0	0	0	0	0	0	0	0	0	0	0	0	0	0	0	0	0	0	0	0	0	0	0	0	0	0	0	0	0	0.1	0	0	0	0	0	0	0
2000-08-28	0	0	0	0	0	0	0	0	0	0	0	0	0	0	0	0	0	0	0	0	0	0	0.1	0.1	0	0	1.7	6.5	0	0.1	0.5	2.2	0	0	0	0.5	0.1	0	0	0.2	0	0	0	0	0	0.1	0	0	0
2000-08-29	0	0	0	0	0	0	0	0	0	0	0	0	0	0.1	0	0	0	0	0	0	0	0	0	0	0	0	0	0	0	0	0	0	0	0	0	0	0	0	0	0	0	0.1	0	0	0	0	0	0	0
2000-08-30	0	0	0	0	0	0	0	0	0	0	0	0	0	0	0	0	0	0	0	0	0	0	0	0	0	0	0	0	0	0	0	0	0	0	0	0	0.9	0	1	0.2	0	0	0	0	0	0	0	0	0
2000-08-31	0	0	0	0	0	0	0	0	0	0	0	0	0	0	0	0	0	0	0	0	0	0	0.1	0.1	0	0	1.7	0	0	0	0	0.6	0	0	0	0	0.2	0	0	0	0.2	0	0	0	0	0	0	0	0
2000-09-01	0	0.6	0	0	0	6.6	0	0	0	0	0	0	0	0	0	0	0	0	0	0	0	0	0	0	0	0	1.9	0	0	0	0	1.9	0	0	0.1	0	0	0	0	0	0.1	0.1	0	0	0	0	0	0	0
2000-09-02	0	0	0	0	0	4.1	0	0	0	0	0	0	0	0.5	0	0	0	0	0	0	0	0	0	0	0	0	2.5	0.3	0.1	0.1	0	0.5	0	0	0.1	0	0	0	3.2	0	0	0	0	0	0	0	0	0	0
2000-09-03	0	0	0	0	0	1.8	0	0	0	0	0	0	0.1	1.9	0	0	0	0	0	0	0	0	0	0	0.1	0.4	0.5	1.3	0	0	0	0	0	0	0	0	0	0	4.2	0	0.1	0	0	0	0	0	0	0	0
2000-09-04	0	0	0	0	0	0	0	0	0	0.1	0	0	0.2	2.5	0	0.1	0	0	0	0	0	0	0	0	0.2	0.5	1.1	0	0	0	0	0	0	0	0	0	0	0	0.8	0	0	0	0	3.6	0	0	0	0	0
2000-09-05	0	0	0	0	0.1	0.8	0	0	0	0	0	0	0	1.6	0	0	0	0.2	0	0	0	0	0	0	0	0	0.8	0.3	0.4	0	0	0.1	0	0	0	0	0.1	0	1.6	0	0	0	0	3.9	0	0	0	0	0
2000-09-06	0	0	0	0	0	1.3	0	0	0	0	0	0	0	4	0	0	0	0	0	0	0	0	0	0	0	0	0	0	0	0	0	2.1	0	0	0	0	0	0	0.2	0	0	0	0	0	0	0	0	0	0
2000-09-07	0	0	0	0	0	0.3	0	0	0	0.1	0	0	0.1	5.2	0	0.3	0	0	0	0	0	0	0	0	0.1	0	2	0.9	0	0	0	0.2	0	0	0	0	0	0	0.4	0	0	0	0	0	0	0	0	0	0
2000-09-08	0	0	0	0	0	0.2	0	0	0	0	0	0	0.2	4.7	0	0	0	0	0	0	0	0	0	0	0.2	0.8	5.9	0	0	0	0	0	0	0	0.1	0	0	0	4.2	0.1	0	0	0	0	0	0	0	0	0
2000-09-09	0	0	0	0	0	5.1	0	0	0	0	0	0	0	0	0	0	0	0	0	0	0	0	0	0	0	0	0.6	0.8	0	0	0	0	0	0	0	0	0	0	1.3	0	0	0	0.1	0.1	0	0	0	0	0
2000-09-10	0	0	0	0	0	1.6	0	0	0	0	0.1	0	0	0	0	0	0	0	0	0	0	0	0.1	0.1	0	0	0.1	1.3	0	0	0	0	0	0	0	0	0	0	0	0	0	0	0.1	0.1	0	0	0	0	0
2000-09-11	0	0	0	0	0	0	0	0	0	0	0	0	0	0	0	0	0	0	0	0	0	0	0	0	0	0	0.8	0	0	0	0	0	0	0	0	0	0	0	0	0	0	0	0	0	0	0	0	0	0
2000-09-12	0	0	0	0	0	0	0	0	0	0	0	0	0	0	0	0	0	0	0	0	0	0	0	0	0	0	0	0	0	0	0	0	0	0	0	0	0	0	0	0	0	0	0	0	0	0	0	0	0
2000-09-13	0	0	0	0	0	4.3	0	0	0	0	0.1	0	0	4.2	0	0	0	0	0	0	0	0	0	0	0	0	0.8	3.7	0	0	0.1	1.8	0.2	0	0.3	0	0	0	1.8	0.1	0	0	0	0	0	0	0	0	0
2000-09-14	0	0	0	0	0	2.5	0	0	0	0	0.1	0	0	6.5	0	0	0	0	0	0	0	0	0	0	0	0	1	2.5	0	0.1	0.1	0	0	0	0.2	5	0	0	0	0.6	0	0	0	0	0	0	0	0	0
2000-09-15	0	0	0	0	0	1.2	0	0	0	0	0.6	0	0	4.1	0	0	0	0.3	0	0	0.3	0.1	0.1	0.1	0	0	0.4	0.1	0.5	0	0	0	0	0	0	0	0	0	1.8	0.1	0	0	0.3	2.5	0	0	0	0	0.1
2000-09-16	0	0	0	0	0	0.3	0	0	0	0	0	0	0	0.2	0	0	0	0	0	0	0	0	0	0	0	0	2.9	0.2	0	0	0	0.6	0	0	0	0	0	0.2	4.3	0	0	0	0.1	0.3	0	0	0	0	0
2000-09-17	0	0	0	0	0	0	0	0	0	0	0	0	0	0	0	0	0	0	0	0	0	0	0	0	0	0	0.8	0	0	0	0	2.1	0	0	0	0	0	0	0.1	0	0	17.6	0	0.5	0	0	0	0	0
2000-09-18	0	0	0	0	0	0	0	0	0	0	0	0	0	0	0	0	0	0	0	0	0	0	0	0	0	0	0	0	0	0	0	0.3	0	0	0	0	0	0	0	0	0	4.7	0.5	0.7	0.1	0	0	0	0
2000-09-19	0	0	0	0	0	0	0	0	0	0	0	0	0	0	0	0	0	0	0	0	0	0	0	0	0	0	0	0	0	0	0	0	0	0	0	0	0	0	0	0	0	0	0	0.3	0	0	0	0	0
2000-09-20	0	0	0	0	0	0	0	0	0	0	0	0	0	0	0	0	0	0	0	0	0.4	0	0	0	0	0	0	0	0	0	0	1.5	0	0	0	0	0	0	7.2	0	0	0	0	0	0	0	0	0	0
2000-09-21	0	0	0	0	0	0	0	0	0	0	0	0	0	0	0	0	0	0	0	0	0	0	0	0	0	0	0	0	0	0	0	7.4	0	0	0	0.6	0.2	0	0.7	0	0	0	0	0	0	0	0	0	0
2000-09-22	0	0	0	0	0	0.1	0	0	0	0	0	0	0	0.1	0	0	0	0	0	0	0.2	0	0	0	0	0	1.5	11.7	0	0	0	3.9	0	0	0.1	0	0.2	0	0	0	0	0	0	0	0	0	0	0	0
2000-09-23	0	0	0	0	0	0.3	0	0	0	0	0	0	0.1	3.1	0	0	0	0	0	0	0	0	0	0	0.1	0.2	0.2	2.9	0	0	0.1	0	0	0.1	0.3	0	0	0	3.4	0	0	0	0	0	0	0	0	0	0
2000-09-24	0	0	0	0	0	0	0	0	0	0	0	0	0	0	0	0	0	0	0	0	0	0	0	0	0	0	1.7	0	0	0	0	0	0	0	0	0	0	0	3	0	0	0	0	0	0	0	0	0	0
2000-09-25	0	0	0	0	0	0	0	0	0	0	0	0	0	0	0	0	0	0	0	0	0	0	0	0	0	0	0.2	0	0	0	0	0	0	0.1	0	0	0	0	0.3	0	0	0	0	0	0	0	0	0	0
2000-09-26	0	0	0	0	0	0	0	0.1	0	0	0	0.1	0	0	0	0	0.1	0	0	0	0	0	0	0	0	0	0.3	0.6	0	0	0	0	0	0	0	0	0	0	0	0	0.1	0	0	0	0	0	0	0	0
2000-09-27	0	0	0	0	0	0	0.1	0	0	0.3	0	0	0	0	0	0	0	0	0	0	0.7	0	0	0	0	0	0	0	0	0	0	0	0	0	0	0	0	0	0	0	0	0	0	0	0	0	0	0	0
2000-09-28	0	0	0	0	0	2.2	0	0	0	0	0	0	0	0	0	0	0	0	0	0	0.5	0	0.4	0.4	0	0	1.7	0.2	0	0	0	0	0	0	0.2	0	0	0	0	0	0	0	0	0	0	0	0	0	0
2000-09-29	0	0	0	0	0	4.3	0	0	0	0	0	0	0	0	0	0	0	0	0	0	0	0	0.2	0.2	0	0	0.7	0.9	0	0	0	4.3	0	0	0	0	0	0	2.1	0	0	0	0	0	0	0	0	0	0
2000-09-30	0	0	0	0	0	2.4	0	0	0	0	0	0	0	7.6	0	0	0	0	0	0	0	0	0	0	0	0.2	0	4	0	0	0	0.5	0	0	0	0	0	0	1.8	0	0	0	0	0	0	0	0	0	0
2000-10-01	0	0	0	0	0	2.4	0	0	0	0	0	0	0.1	2.5	0	0	0	0	0	0	0	0	0	0	0.1	0.1	2.6	1.4	0	0	0	0.6	0	0	0	0	1.1	0.1	7.1	0	0	0	0	0	0	0	0	0	0
2000-10-02	0	0	0	0	0	0.2	0	0	0	0	0	0	0	0	0	0	0	0	0	0	0	0	0	0	0	0	0	0	0	0	0	0	0	0	0	0	0	0	0	0	0	0	0	0	0	0	0	0	0
2000-10-03	0	0	0	0	0	0	0	0	0	0	0.1	0	0	0	0	0	0	0	0	0	0	0	0	0	0	0	0	0	0	0	0	0	0	0	0	0	0	0	0	0	0.1	0	0	0	0	0	0	0	0
2000-10-04	0	0	0	0	0	0	0	0	0	0	0	0	0	0	0	0	0	0	0	0	0	0	0	0	0	0	0	0	0	0	0	0	0	0	0	0	0	0	0	0	0	0	0	0.4	0	0	0	0	0
2000-10-05	0	0	0	0	0	0	0	0	0	0	0	0	0	0	0	0	0	0	0	0	0	0	0	0	0	0	0	0	0	0	0	0	0	0	0	0	0	0	0	0	0	0	0.5	0	0	0	0	0	0
2000-10-06	0	0	0	0	0	0.4	0	0	0	0	0	0	0	0	0	0	0	0	0	0	0	0	0	0	0	0	0.2	1.1	0.1	0	0	0.1	0	0	0	0	0	0	0.2	0	0	0	0	0	0	0	0	0	0
2000-10-07	0	0	0	0	0	1	0	0	0	0	0.1	0	0	3.8	0	0	0	0	0	0	0	0	0	0	0	0	0.6	1.1	0	0	0	0.6	0	0	0	0	0	0	0.1	0.1	0	0	0	0	0	0	0	0	0
2000-10-08	0	0	0	0	0	0.4	0	0	0	0	0	0	0	0	0	0	0	0	0	0	0	0	0	0	0	0	0.3	1.8	0	0	0	1.2	0	0	0	0	0	0	2.5	0	0	0	0	0	0	0	0	0	0
2000-10-09	0	0	0	0	0	0.9	0	0	0	0	0	0	0	0.6	0	0	0	0	0	0	0	0	0	0	0	0	0	0	0	0	0	0.4	0	0	0	0	0	0	0.8	0	0	0	1.2	1.9	0	0	0	0	0
2000-10-10	0	0	0	0	0	0	0	0	0	0	0	0	0	0	0	0	0	0	0	0	0	0	0	0	0	0	0	0	0	0	0	0	0	0	0	0	0	0	0	0.1	0	0.1	0	0	0	0	0	0	0
2000-10-11	0	0	0	0	0	0	0	0	0	0	0	0	0	0	0	0	0	0	0	0	0	0	0	0	0	0	0	0	0	0	0	0	0	0	0	0	0	0	0	0	0	0	0	0.4	0	0	0	0	0
2000-10-12	0	0	0	0	0	0	0	0	0	0	0	0	0	0	0	0	0	0	0	0	0	0	0	0	0	0	0	0	0	0	0	0	0	0	0	0	0	0	0	0	0	0	0	0	0	0	0	0	0
2000-10-13	0	0	0	0	0	0	0	0	0	0	0	0	0	0	0	0	0	0	0	0	0	0	0	0	0	0	0	0	0	0	0	0	0	0	0	0	0	0	0.2	0	0	0	0	0	0	0	0	0	0
2000-10-14	0	0	0	0	0	1.2	0	0	0	0	0	0	0	0.1	0	0	0	0	0	0	0	0	0	0	0	0	0.1	0.6	0	0	0	4.2	0	0	0	0	0	0	0.5	0.2	0	0	0.1	0	0	0	0	0	0
2000-10-15	0	0	0	0	0	0.5	0	0	0	0	0	0	0	0	0	0	0	0	0	0	0	0	0	0	0	0	0	0.2	0	0	0	0.6	0	0	0	0	0.1	0	2.1	0	0	0	0	0	0	0	0	0	0
2000-10-16	0	0	0	0	0	0.6	0	0	0	0	0	0	0	1.9	0	0	0	0	0	0	0	0.1	0	0	0	0	0	0.3	0	0	0.1	0	0	0	0.1	0.2	0	0.1	0.3	0	0	0	0	0	0	0	0	0	0.1
2000-10-17	0	0	0.3	0	0	1.4	0	0	0	0	0	0	0	0	0	0	0	0	0	0	0	0	0	0	0	0	0.5	0	0	0	0.1	0.4	0	0	0	0	0	0	0	0	0	0	0	0.5	0	0	0	0	0
2000-10-18	0	0.3	0	0	0	0	0	0	0	0	0	0	0.1	1.1	0	0.1	0	0.2	0	0	0	0	0	0	0.1	0.1	0	0	0	0.2	0.3	0	0	0	0	0	0	0	0	0	0	0	0	0	0	0	0	0	0
2000-10-19	0	0	0	0	0	0	0	0	0	0	0	0	0	0	0	0	0	0	0	0	0	0	0	0	0	0	0	0	0	0.1	0.1	0	0	0	0	0	0	0	0	0	0	0	0	0.1	0	0	0	0	0
2000-10-20	0	0	0	0	0	0	0	0	0	0	0	0	0	0.5	0	0	0	0	0	0	0	0	0	0	0	0	0.2	0	0	0	0	0	0	0	0	0	0	0	0	0	0	0	0	0.5	0	0	0	0	0
2000-10-21	0	0	0	0	0	0	0	0	0	0	0	0	0	0	0	0	0	0	0	0	0	0	0	0	0	0	0	0	0	0.2	0	0.2	0	0	0	0	0	0	0	0	0.2	0	0.1	0	0	0	0	0	0
2000-10-22	0	0	0	0	0	0	0	0	0	0	0	0	0	1	0	0	0	0	0	0	0	0	0	0	0	0	0	0	0	0	0	0.7	0	0	0	0	0	0	0.7	0	0.2	0	0	0	0	0	0	0	0
2000-10-23	0	0	0	0	0	0	0	0	0	0	0	0	0	0	0	0	0	0	0	0	0	0	0	0	0	0	0	0	0	0	0	1.2	0	0	0	0	0	0	0.9	0	0	0	0	1.5	0	0	0	0	0
2000-10-24	0	0	0	0	0	0	0	0	0	0	0	0	0	0	0	0	0	0	0	0	0	0	0	0	0	0	0.1	0	0	0	0	0.4	0	0	0	0	0	0	0.1	0	0	0	1.7	1	0	0	0	0	0
2000-10-25	0	0	0	0	0	0	0	0	0	0	0	0	0	0.9	0	0	0	0	0	0	0	0	0	0	0	0	0	0.1	0	0	0	0.1	0	0	0	0	0	0	0	0	0	0.6	6.7	7.5	0	0	0	0	0
2000-10-26	0	0	0	0	0	0	0	0	0	0	0	0	0	0	0	0	0	0	0	0	0	0	0	0	0	0	0	0	0	0	0	0	0	0	0	0	0	0	0	0	0	0.2	1.3	1.8	0	0	0	0	0
2000-10-27	5.4	0.3	6.1	2.4	0	0	1.9	1.1	0.6	0	2	1.2	2.5	0	1.6	3.1	1.2	1.7	0.8	0.4	3.4	1.5	0.2	0.2	2.5	0.1	0.1	0	0.1	0	0	0	0	0	0	0	0	0	0.2	0	0	0	3.1	0	0	0	1.6	0.4	1.5
2000-10-28	0	0.5	0	0	0.2	0.1	0.4	0	6.3	0	0.1	0	0.2	0.2	4.3	0.1	0	0.4	10.9	1.5	0.7	0.2	0	0	0.2	0.4	0	0.6	0	0	0.3	1	0.5	0	0	0	0	0	0.5	0	0	3.3	13.2	0	5.7	0	4.3	1.5	0.2
2000-10-29	0	0.2	0	0	0	0	0	0	0	0	0	0	0	0	0	0	0	0	0	0	0	0	0	0	0	0	0.1	0	0	0	0	0	0	0	0	0	0	0	0.1	0	1.2	0	0	0	0	0	0	0	0
2000-10-30	0	0	0.1	0.3	2	0	8.3	0.8	2.2	4.7	5.5	0.6	2.9	7	0.9	3.7	0.6	5.1	1	0.7	0.1	0.5	0.7	0.7	2.9	2.5	43.9	27.9	10.5	9.9	10.5	23.6	0.3	0.6	0.9	1	4.1	9	0.6	0	7	2	5.2	10.3	0	0	0.9	0.7	0.5
2000-10-31	0	0	0	0	0	0.3	0	0.7	0.3	0.2	3.1	1.3	1.5	1.8	1	0.6	1.3	1.3	0.5	0.4	1.4	1.5	1.2	1.2	1.5	2.1	0.8	0	1.2	0.8	0.4	0.3	0.3	0.5	2	0.5	0.7	5.2	7.4	2.3	2.8	5.7	0	3.2	0.4	6.6	1	0.4	1.5
2000-11-01	0	0.1	0	0	0	0.2	1.1	0	0	0	0.2	0	0.2	0.2	0	0.1	0	0.1	0	0	0	0	0.2	0.2	0.2	0.2	0	0	0	0	0	0	0	0	0.2	5.6	0.2	0	0	0.6	0	0	0	0	3.4	0	0	0	0
2000-11-02	0	0	0.2	2.3	0	0.3	9.8	0	0	0.3	0	0	0	0	0	0.1	0	0	0	0	0.1	0.1	0.2	0.2	0	0	0	0.5	0	0	0	0.1	0	0	2.6	0	0.7	1.1	0	0	0	0	0	1.9	22	0.1	0	0	0.1
2000-11-03	7.6	27	3.5	21.2	9.9	13	8.3	2.2	13.5	26.3	0.1	6.9	1.1	0.7	0.5	1.1	6.9	4.9	1.8	1.2	0.3	24.4	6.9	6.9	1.1	1.3	0	0	0	0.3	0.1	0	0	1	0.1	0	0.1	0.8	41.7	3.6	4.8	0	0.6	0	10.6	16.9	0.5	1.2	24.4
2000-11-04	0	0	0	0	17.6	30.6	0.5	1.6	13.5	49.7	0	1.2	1.7	0.2	4.8	1.2	1.2	0.3	10.2	1.9	3.1	0.8	1.1	1.1	1.7	1	0	0.1	0.3	0.7	0.2	0.1	0	7.1	1.2	0	5.2	25.7	1.7	5.8	6	0	19	0	0	0	4.8	1.9	0.8
2000-11-05	0.2	4.6	0	0	2	1.3	0	4.8	11.6	5.5	0.4	9.9	5	1.1	10.3	3.5	9.9	5.9	16.4	10.5	35.3	11.5	10	10	5	5.6	0.7	0	0	0	0	0	0	0	15.5	0	0	0	0	0.2	0	9.6	0.1	0	0	0	10.3	10.5	11.5
2000-11-06	0	0	0	0	0.2	0	0	0	8.6	0	8.2	1.9	4.4	4.6	2.3	3.2	1.9	8.3	4.2	0.3	12.6	8.9	11.7	11.7	4.4	7.5	2.9	0	0	0.1	0	0.5	0	0	0	1.1	0.3	0	0	0	0.4	0.1	0.1	0.7	0	0	2.3	0.3	8.9
2000-11-07	0	0	0	0	0	0.6	5.1	0	0	0	3.3	0	4	0	0	5.2	0	6.4	0	0	0	0.5	1.3	1.3	4	0	0	0	0	0.3	0	0	0	0.9	0.3	1.7	0.3	0	0.3	0	8.8	0.5	0.7	0	2.4	0.6	0	0	0.5
2000-11-08	0	0.2	0	0	0	0.2	0.1	6.1	0	1.6	1.8	1.5	0	2.6	0.3	0.1	1.5	0.6	4.2	1	0.9	1	0	0	0	1.8	0.3	0.4	0.8	3.6	2.4	0	0	30	2.8	0.9	0.3	2	0.9	1.7	13	0.1	0.7	0	5.9	4.4	0.3	1	1
2000-11-09	9.5	1.2	5.1	5.1	0.1	0.1	3	2.2	2	2.2	0.8	3.6	4.9	6.2	1.6	3.4	3.6	4.6	2.4	2.2	13.5	7.6	1.8	1.8	4.9	4.5	0	1.4	1.6	7.3	2	0.1	0.3	20.5	14.7	0.7	0.6	4.1	0.2	11.6	11.2	9.2	3.6	0.6	0	0	1.6	2.2	7.6
2000-11-10	0	0	0	0	2.8	2.2	4.5	3.8	15.1	6.2	27.2	3.3	3.2	3.1	15.4	4.2	3.3	21.3	27.1	12.7	6.3	3	2.7	2.7	3.2	2.5	10	3.1	5.9	4.3	2.8	1	2.4	9.9	11.7	2.8	3.4	2.7	0.1	7.3	8.1	0	2	0.8	3.1	0	15.4	12.7	3
2000-11-11	0	5.5	0.1	0	0.3	6.1	0.2	0.1	9.6	5	0.6	0.1	4.1	0.5	1.5	2.8	0.1	1.5	3.6	0.2	3.8	0.4	0.9	0.9	4.1	3.1	0.3	0	0	0.5	0.1	0	0	0.9	0	0	0	0	0.5	0	6.6	5.6	1.5	0.4	0	3.7	1.5	0.2	0.4
2000-11-12	8.8	8.9	5.3	8.9	19.7	10.3	1.6	6.3	67.6	8.1	0	10.7	1.7	0	6.8	3.5	10.7	0.4	31	5.2	2	9.9	5.6	5.6	1.7	1.1	0	1.6	1.6	1.1	1	0.5	1.2	9.6	9.8	3.3	2.1	0.9	3.6	4.9	0.2	0	0	20.1	0	1.6	6.8	5.2	9.9
2000-11-13	0	0.4	1	0.5	10.9	5.6	11.8	14.4	8	24.1	6.6	18.8	9.6	4.1	11.7	12	18.8	8.6	7	9.9	7	21.3	14.8	14.8	9.6	9.1	1	1.3	3.7	0.9	0.3	0.5	1.4	0.2	0	0	0	0	0	0	2.4	0	11.3	0.9	0.3	0.2	11.7	9.9	21.3
2000-11-14	1.4	0	0	0.8	0	2.7	0.2	0.3	0.4	11.7	0	0.4	0.1	1.3	2	0	0.4	0	0.3	1	1.6	0.7	0.1	0.1	0.1	0.8	2	0.9	1.6	0	1.1	0.2	0	5.4	19.4	0.3	10.6	19	0	17.6	3.5	0	0.7	3.2	0	0	2	1	0.7
2000-11-15	22	0	11.6	10.3	2.3	0.5	13.9	28	0	2.6	0.5	19	4.3	1.3	2.5	5.5	19	12.3	0	0.7	2.6	12	9	9	4.3	3.1	10.1	0.5	2.7	0.2	2.7	0.4	4.6	35.4	15.2	0	0.1	0.8	5.5	12.5	1.1	0	0.9	14.2	0	0	2.5	0.7	12
2000-11-16	7.1	0	17.6	0.1	15.2	0.2	0.3	0.1	20.3	7.3	0	0.5	7.5	1.8	3.6	8.4	0.5	1	11.9	4	1.7	2	0.5	0.5	7.5	2.3	0.1	1.4	0	4.3	0.9	0.9	2.3	0	7.4	0.5	17.2	25.7	45.5	40.9	12.2	0	0	35	0	0	3.6	4	2
2000-11-17	0.1	1	0.6	0	0.4	0.2	0	1.8	0	0.9	1.9	0.9	0	0.1	0.3	0	0.9	0	3.5	0.1	0.1	0.5	0.3	0.3	0	0.6	3.1	0.2	0.4	0	0	2.4	19	2.7	0.5	0.5	0.6	0	7	2.4	0.1	0	0	0	38.4	0.6	0.3	0.1	0.5
2000-11-18	11.3	0.2	24.6	0	1	0	37.4	0	0	0.3	22.4	0	2.1	6.7	0	3	0	19.9	0	0	0	0	0	0	2.1	1.5	6.7	3.4	5.3	0.1	2.2	33.1	0.5	0	0.3	1	23.7	4.9	0	0.1	0	0	0	0	0	0	0	0	0
2000-11-19	0	0	0	0	15.8	63.4	0	18.3	46.8	0.1	3.2	25.2	1.7	3.8	56	2	25.2	1.6	79.6	27.4	27.8	59.3	12	12	1.7	2.9	1.4	2.1	3.1	0.5	1.5	2.8	0.1	1.2	0.7	0.4	8.1	1.2	0	3.1	0.1	0	0	0	0	0	56	27.4	59.3
2000-11-20	0	0	0	0	4.9	20.4	0.8	15.2	7	0	22	9.7	1.4	15.1	11.9	2.7	9.7	1.1	10.8	7.4	35.7	8.6	7.2	7.2	1.4	4.9	36.4	29.1	19.5	0.5	1.9	46.4	12.1	17.7	28	21.3	19.1	5.4	0.1	0.3	0.4	0	0.1	0	0	0	11.9	7.4	8.6
2000-11-21	0	0	0	0	0	0	0	0	0	0.3	0	0	0	0	0	0	0	0	0	0	0	0	0	0	0	0	0	0	0	0	0	0	0	0	0	0	0	0	1.5	14.6	0	0	0	0	0	0	0	0	0
2000-11-22	0	0	0.8	0	0	1.5	0	0	0	0	0	0	0	0	0	0	0	0	0	0	0	0	0	0	0	0	1.7	3.1	0.2	0	0	1.6	0	0	0.3	1.3	1.7	0.2	7.6	3.3	0	0	0	0	0	0	0	0	0
2000-11-23	0	0	0	0	0	0.9	0	0	0	0	0	0	0	0	0	0	0	0	0	0	0	0	0	0	0	0	0.2	0	0.1	0.1	0	0	6.5	0.9	6.6	17.6	7.6	0.3	7.8	5.1	3.4	0	0.4	0.6	1.9	33.5	0	0	0
2000-11-24	0	0	0	0	0	0	0.1	0	0	0.3	6.2	0	1.6	0.1	0	1.8	0	0.3	0	0	4	0	0.2	0.2	1.6	0.6	3.3	0.5	1.3	0	0	0.6	0.1	0.7	1.1	0.7	0.6	2.1	5.1	4.3	0.1	0	0.6	0.7	0	0	0	0	0
2000-11-25	0	0	0	0	0.5	0	0.5	0	0	0	10.4	0	0	0.1	0.9	0.1	0	0.1	0	0.5	0.6	0.6	0	0	0	0	7	3.3	3.9	0.5	1.3	3	0.3	0.2	1.5	5	3.5	2.5	0	1.4	1.3	0	4.5	0.5	0	0	0.9	0.5	0.6
2000-11-26	0	0	0	0.1	0	0	1.9	0.7	0	0	11.7	0.1	0.7	11.9	0.2	3.8	0.1	12.1	0.7	0.1	0.2	0	0	0	0.7	1.7	22.4	28.4	70.6	1.9	0.5	15.3	15	0.9	15.6	23.2	20	3.6	15.8	2.4	5.4	1.3	4.9	9.6	0.3	0.8	0.2	0.1	0
2000-11-27	22.4	0.7	2.1	52.4	0	0.4	36.3	22.1	3.7	0.2	0.4	22.7	17.9	4.8	1.1	25.8	22.7	15.9	0.9	1.2	10.5	19.9	19.6	19.6	17.9	10.3	7.5	5.8	2.1	4.7	5.2	12.6	8.1	6.4	34.5	52.8	39.4	24.5	19.6	14.9	5.3	1.2	0.7	2	1.8	0	1.1	1.2	19.9
2000-11-28	0.6	0	2.1	0.1	0	0	4.1	0.5	0.1	3.4	11.2	1.2	2.4	1.5	1.5	3.1	1.2	1.5	0.3	0.9	7.5	2.1	0.7	0.7	2.4	1.3	1.3	0.5	0.7	0.2	0.1	0.6	0.2	0	0	2.7	0.6	0.3	0.7	0.5	0.5	0	3.3	12.7	18.8	15.6	1.5	0.9	2.1
2000-11-29	0	0	0	0	0	0.8	0.6	0	0	0	0.2	0	0.2	1.4	0.4	0.9	0	0.3	0.4	0	4.3	0	0	0	0.2	0.1	0	0	0	4.1	1.8	0	0	2.3	6.8	0	0.6	2.3	0	0	8.2	8.1	11.2	13.1	2.2	14.7	0.4	0	0
2000-11-30	9.1	13.2	9.8	5.2	33.9	4.6	32.5	38.1	49.3	28.3	25.8	15.2	12.8	20.3	12.9	24.6	15.2	14.4	12.3	13	8.5	8.7	9.9	9.9	12.8	10	9	6.2	0	0	2.1	2.9	0.7	5.8	2.3	0.4	0.6	1.3	0.8	0.1	59.1	3.7	0.1	16.3	3.1	3.2	12.9	13	8.7
2000-12-01	4.2	0	1.6	4.5	4.2	15.1	16.8	19.8	14.5	1.9	44.5	1.9	9.2	33.7	9.4	23.5	1.9	34.5	13.3	12.1	21.3	2.6	2.7	2.7	9.2	9.8	31.2	25	2.2	16.7	25	2.9	50.7	36.9	33.2	0	0	0	2.9	0.7	13.5	0.5	4.9	0.2	0	1.1	9.4	12.1	2.6
2000-12-02	0	0	0	0	0	0	0	0	0	0	0	0	0	0	0	0	0	0	0	0	0	0	0	0	0	0	1.9	0	0	0	0	0.2	0.9	14.7	12.6	10.3	0	0	3	0.4	0	4.7	3	0.2	0	0	0	0	0
2000-12-03	0	0	0	0	0	0	0.2	0	0	0	0.1	0	0	0	0	0	0	0	0	0	0	0	0	0	0	0	0.1	0	2.3	0.6	0.3	0	6.2	4.6	0.7	0.7	0.7	0	2.9	0.7	9.8	0.3	1.1	0.5	0	0	0	0	0
2000-12-04	9	0	1	0.4	0	0.1	1.3	0.2	0	0	0.9	0.1	2.9	0.2	0	3.8	0.1	3.1	0	0	1.8	0.5	0.6	0.6	2.9	0.6	1.2	1.1	7.1	3.2	5.8	4.4	2.8	1.6	12.7	5	8.2	5.6	5	1.9	6.8	0	6	3.8	0	0	0	0	0.5
2000-12-05	5.7	0	0	6	0	0	4.4	2.2	1	0	9	0.2	2.9	9.2	0.4	5.8	0.2	6.7	0.1	0	13.4	1.8	6.1	6.1	2.9	11.5	13.2	5.8	1.1	3.2	0.1	0.8	0.3	0	0	3.9	0.1	0	3	5.5	0.8	0	2.4	3	0	0	0.4	0	1.8
2000-12-06	0	0	0	1.3	0	0	2.3	0.8	0	0	6.4	0.7	4.9	4.6	0.8	7.3	0.7	12.2	4.2	0.1	8	0.3	0.3	0.3	4.9	0.5	9.1	4	0.2	3.7	3.4	3.1	0	2.5	0	0	0.1	0	0.6	0.6	3.1	0	5.6	3.2	0	0	0.8	0.1	0.3
2000-12-07	4.7	0	3.2	0	0.4	0.4	30.6	0.7	0	0	0	0.1	0.4	0	1	0	0.1	0.3	0	0.3	10.3	0	0	0	0.4	6.2	0	0	0	0	0	0.2	0	0	0	0	0	0	0	0	0	0	1.2	6	0	0	1	0.3	0
2000-12-08	0.3	0.3	0.7	0.9	0	0	5.2	0	6.7	14.6	0	0.1	0	0	0.6	0	0.1	1.7	0	1	5.8	0	0	0	0	0	0	0.8	1.1	0.4	0	0	0	0	0.3	0	0	0.1	0	0.4	4.6	2.8	29.5	0	3.4	9.3	0.6	1	0
2000-12-09	7.4	6.7	7.5	12.4	7.4	0.4	6.1	0.4	49.5	19	0	1.4	6.5	0	2.2	2.5	1.4	3.3	5.4	2	0.2	4.4	7.8	7.8	6.5	4.5	0	0.7	0.8	0	0.7	0.1	1.1	0.5	0.1	0	1.4	1.3	1.2	0	1	0.5	2.4	0.1	11.4	7.3	2.2	2	4.4
2000-12-10	0.2	0	0	0.1	0	1.9	1.1	0.1	0.2	0	0	0.1	1.8	0.1	7.6	3.3	0.1	7.3	2.1	11.2	2.8	0.4	1.3	1.3	1.8	0.7	0	1.4	0	14.1	7.6	1.9	0	1.5	4.4	0	1.8	2.3	0.8	0.6	16.3	0.1	0	1.4	15.9	0.6	7.6	11.2	0.4
2000-12-11	0	6.4	7.3	2.4	0	0.4	0	0	0	0	0	0	0	0.2	0	0	0	0	0	0	0	0	0	0	0	0	0.2	0	0	0	0	0.4	0	0	0	0	0	0	0	2.4	0	1.9	34.3	0.8	1.7	15	0	0	0
2000-12-12	1.9	0	56.2	0	11.5	0	0	0	0	7	44.1	0	3.1	1.6	0	1.7	0	2.7	0	0	6.6	0	0	0	3.1	2.4	0.3	0	10.5	1.4	34.3	0	0	17.1	0.1	17.3	0.7	0	0	3.8	0	0	5.5	0	2.3	0.1	0	0	0
2000-12-13	12.3	19	42.3	9.9	0	0	163.8	3.5	0	12.2	2	1	46	18.4	1	36.9	1	11.1	0	2.9	1.7	0	23	23	46	40.1	10.8	25.1	22.2	9.8	46.9	92.4	25.8	35.7	7.1	38.3	10.4	23	19.2	27	22.1	0	0.7	1.9	0	0	1	2.9	0
2000-12-14	1.1	0	0	1.5	0	0	0	0	0	0	0	0	0.1	0	0	0.2	0	0.4	0	0	0	0	0	0	0.1	0	2.5	44.1	0.7	0	0	60.2	47.3	2.8	6.1	19	5.4	0.9	12.2	0.8	0	0	9.6	10.2	0	0	0	0	0
2000-12-15	0	0	0	0	0	0.3	4.2	0	0.2	0	1.1	0	1	1.2	0	0.4	0	0.6	0	0	0.7	0	0.8	0.8	1	1	48.7	50.3	15	0.2	1.5	30.2	10.9	0.3	2.2	17.7	7.6	0.9	23.3	5.4	0.7	0	23	0.3	0	0	0	0	0
2000-12-16	0	0	0	0	0	0.5	0	0	0	0	0	0	0	1.2	0	0	0	0	0	0	0	0	0	0	0	0	0	0	0	0	0	0.1	0.3	0	0	0	0.3	0.9	0.9	1.8	0.1	57.6	0	0.6	0.1	0.1	0	0	0
2000-12-17	0	0	0	0.1	0	0.6	0	0	0	0	0	0	0	0	0	0	0	0	0	0	0	0	0	0	0	0	0	0	0	0	0	0.4	1.3	0	0	0	0	0	1.1	0	0.1	14.3	0.5	6.8	1	1.6	0	0	0
2000-12-18	0	0	0	0.3	0	0	4.7	0	0	0	0	0	0	0	0	0	0	0	0	0	0.2	0	0.2	0.2	0	0	0	0.2	0	0	0	1.1	0	0	0.2	0	0	0	0.6	0.4	0.1	10	13	3.4	8.8	15.7	0	0	0
2000-12-19	0	0	0	0	0	0	1	8.2	0	1.5	17.2	9.9	0	2.9	7.2	0.3	9.9	0	1	5.4	5.9	9.7	2	2	0	0.9	9.3	1.5	22.4	0.3	0.6	1.3	1.4	0	0	0	0	0	0	0	0	3.7	8.4	7.7	2.5	8.7	7.2	5.4	9.7
2000-12-20	0.4	0.5	0.2	0.5	0	0	0.7	0	0	6.5	0.9	1.5	0	0.1	0	0	1.5	1.8	0	0	0	0.8	0.1	0.1	0	0	11.7	9.6	4	0.6	1	5.4	0.1	0	0	0.4	0.1	0.5	9.7	0.9	0.2	0.2	7.2	0.5	2	9.2	0	0	0.8
2000-12-21	0.4	7.6	0.9	1.9	5.8	0	2.7	1	20.1	16.6	0.2	5	1.1	9.8	11.1	1.6	5	1.2	20.5	7.8	11.8	6.6	4.4	4.4	1.1	2.7	3.4	0	0.7	0	0	0	4.6	0	0.1	5.6	0.3	0.1	41	12.9	0.2	26.4	1.3	12.3	12.2	3	11.1	7.8	6.6
2000-12-22	18.7	24.9	1.7	4.1	3.3	9.6	78.5	21.8	3.4	16.8	0.2	13.8	5.9	3.7	15.6	9.9	13.8	5.4	9.2	26.9	16.6	13.4	9.5	9.5	5.9	6.7	0.9	1.4	3.9	18	16.9	7.2	22.8	14.9	5.2	5.6	13.8	8.8	16.8	33.7	12.3	23.1	4	5.2	1.3	8.1	15.6	26.9	13.4
2000-12-23	18.6	3.8	8.7	6.7	16.6	5.7	13.4	10.2	10.1	3.2	14.2	6.5	9.1	9.9	24	4.8	6.5	12.7	20.7	16.2	4.8	2.9	2.6	2.6	9.1	11.5	22.6	21.3	15	40.4	16.6	8.9	39.8	17.1	0.2	26.1	3.5	6.2	2.6	11.6	22.7	3.7	1.3	6.8	2.1	1.3	24	16.2	2.9
2000-12-24	0.5	1.8	0.1	4.3	2.5	4.2	14.6	4.6	5.6	1.5	0.3	2.3	2.6	7.5	2.5	3	2.3	2.2	3.9	5.1	0.9	1.8	1.6	1.6	2.6	2.5	6.6	30.5	1.7	5.9	4.9	32.7	0.3	9.9	3.5	3	0.1	0	12	0	18.7	7.8	12.9	0.4	0	0.1	2.5	5.1	1.8
2000-12-25	4.7	0.2	9.5	11.9	10.6	1.6	11.1	0	4.1	0	2.7	0	0.6	0.2	0	0	0	0	0	0	0	0	0	0	0.6	0.9	2.9	0.5	0	0	0	0	5.4	2.2	3	3.8	1.3	0.1	1.8	0.1	8.7	2.3	0	0	0.2	0	0	0	0
2000-12-26	0	14.3	0	1.1	0.1	0.3	2.5	1	0	22.1	4.6	0	0.1	1.2	8.1	0.1	0	3.6	1.3	20.3	0	0	0	0	0.1	0.3	0	0	0	0	0	0	2.2	1.5	3.8	23.8	3.8	0	11.3	23.6	1.1	0.8	7.2	0.3	0	0	8.1	20.3	0
2000-12-27	0	0.4	0	0.6	24.2	0.8	0	0	9.4	0	0.9	0	0	0.3	0	0	0	0	0.3	0	0	0	0	0	0	0	0.7	0.1	0	1.5	0.2	1.3	1.2	12.3	0.2	0.5	0	0.2	70.9	51.6	17.2	8.3	19.9	9.4	0	0	0	0	0
2000-12-28	0	0	0	0	0.1	0	0.1	0	0	0	0.1	0.1	2.9	0.3	0.5	0.3	0.1	0	0.8	0	5.4	0.9	0.5	0.5	2.9	0.9	4.1	3.3	0	0	0.1	3.2	70.3	1.5	3.2	3	2.7	0.7	2.3	10.9	0.2	0.2	0.3	1.4	1.5	0.5	0.5	0	0.9
2000-12-29	0.9	0.1	0	0	0	0	0	0	0	0	0.8	0	0	0.6	0	0	0	3.7	0	0	0	0	0	0	0	0.1	0.6	0.2	4.1	1.5	0.4	0.1	22.3	0.6	1.7	5.7	2.1	0.3	9.7	8.3	3.4	3	11.6	1.8	0	0	0	0	0
2000-12-30	0.2	8	4.8	0	0	2.8	0	0	0	0	0.1	0	0	0	0	0	0	0	0	0	0	0	0	0	0	0	0	0	0.4	55.9	5.6	0.5	24.1	2	0.5	38.8	11.7	0.3	6.6	11.3	5.5	1	0	5.9	12	30.8	0	0	0
2000-12-31	1.2	2.8	4.2	0	0	2.2	0	0	0	0	0	0	32.8	0	0	1.4	0	37.3	0	0	20.3	0.2	0.3	0.3	32.8	11.1	2.6	2.6	4.2	23.5	8.5	2	0.9	3.6	7.5	4.2	2.7	3.4	0.6	12.4	29.5	11.4	1.7	1.1	3.2	0.3	0	0	0.2
2001-01-01	0	0	0	0	0	1.2	0.1	8	0	0	0.9	12.3	2	0	9.9	1.4	12.3	1.8	7.6	17	2.5	12.6	7	7	2	3.6	15.4	7.2	0.2	32	40.6	6.7	7.3	17.8	0.1	18.2	4.8	0.4	3.2	7.9	2.1	3.9	0	0.4	3.2	3.5	9.9	17	12.6
2001-01-02	0	0	0	0	47.6	45.4	2.2	1.3	16.6	10.6	0.6	0.8	4.2	6.1	12.5	1.5	0.8	5.7	33.8	31.7	72.4	8.7	4.2	4.2	4.2	2.8	3.1	24.9	33.4	14.1	37.2	6.3	0	16.6	0	0	0.2	0.3	3.4	3.4	10.4	12.7	2.2	21.7	0	2.1	12.5	31.7	8.7
2001-01-03	0.6	3.1	6.1	30	22.6	19.5	10.8	0.2	5.3	0	9.1	0.3	0.2	0.9	4.7	0	0.3	2.8	3.5	6	2.6	2.2	1.7	1.7	0.2	1	3.4	3	11.8	17.5	15.2	2.2	0.4	18.6	10.3	3.2	6.5	6	7.2	14.1	12.7	0	0	4.7	0	0	4.7	6	2.2
2001-01-04	0	2.2	0	1.6	0	0	0	0	0	0	0	0	0	0	0	0	0	0	0	0	0	0	0	0	0	0	0	0	0	5.5	3.4	0.2	15.7	2.6	31.1	25.5	14.3	4.2	0.1	0.5	15.8	0	5.8	1.3	0	0	0	0	0
2001-01-05	0	0.3	0	0.1	0	0	0	0	0	0	0	0	0	0	0	0	0	0	0	0	0	0	0	0	0	0	0	0	0	0	0	0	18.4	2.6	1.7	11.8	4.1	2.7	16.8	30.5	0.2	0	1	5.5	0	0	0	0	0
2001-01-06	0	0	0	0	0	0	0	0	0	0	0	0	0	0	0	0	0	0	0	0	0	0	0	0	0	0	0	0	0	0	0	0	34.3	0	1.8	68.7	17.8	6.8	7.3	26.1	0.3	0	3.2	3.9	0	0	0	0	0
2001-01-07	0	0	0	1	0	0.7	0	0	0	0	0	0	0	0	0	0	0	0	0	0	0	0	0	0	0	0	0	0.1	0.3	9.2	23	2.7	6.5	7.6	3.7	3	2.5	1.6	2	14.2	5.7	0	9.8	0.1	0	0	0	0	0
2001-01-08	4.1	0	0	0	0	1	0.4	0	0	0.6	0	0	0	0.2	0	0	0	0	0	0.1	0	0	0	0	0	0	0	0.3	0.6	0.2	1.6	1.4	61.5	23.2	14.2	25.5	9.8	8.5	2.7	3.4	17.2	0	0	0	0	0	0	0.1	0
2001-01-09	0.2	0	0.3	0	0	0.1	1.4	0	0	0	1.3	0	0	0.2	0	0	0	0.8	0	0	0	0	0	0	0	0	0.4	1.3	22	29.3	10.4	2.8	0.4	20.9	17.9	1.7	12.1	9.3	28.2	47.5	25.4	0	0.1	0	0	0	0	0	0
2001-01-10	0.6	0	0.1	0	0	0	0.6	0.2	0	0	0	0	0	0	0	0	0	0	0	0	0	0	0	0	0	0	0.2	0	27.9	10.5	12.5	17.5	2	49.3	0	1.9	0	0.7	0	0	21.4	0	0	1.8	0	0	0	0	0
2001-01-11	12.8	0	5	0	0	0	17.1	0.6	0	0	7.5	2.2	5.4	7.6	1.3	2.7	2.2	2.2	1.3	0.4	25.4	5.9	12.5	12.5	5.4	9.3	33	13.9	11.9	25.3	32.3	44.2	1.4	1.6	5.3	0.5	3.9	0.3	0	1	14	0	0.3	0	0.3	0	1.3	0.4	5.9
2001-01-12	8.4	0	8.7	4.1	14.4	0	14.5	19.1	29.1	0.5	11.7	17.6	11.4	4.4	6.7	10.3	17.6	3.8	3.6	6.9	18.9	19.7	15.1	15.1	11.4	11.6	16.9	52.6	16.1	9.1	17.1	41.1	1.5	12.4	18.2	15.4	9.6	4.3	2.1	0.6	5.1	0.9	0.5	0	0	0	6.7	6.9	19.7
2001-01-13	11.1	2.8	3.6	1.2	6.9	2.8	9.5	20.7	28.4	0	4.1	18.3	17.1	16	7.7	12.3	18.3	9.5	7	9.5	22	16.1	13.9	13.9	17.1	19.8	7.4	9.3	3.1	17.3	21.3	11.8	9.3	18.5	5.7	51.4	6.9	3.1	4.9	0.9	10.8	0.4	0.1	0	0	0	7.7	9.5	16.1
2001-01-14	19.4	0.7	2.7	11.2	38.8	0.6	8.2	0.8	10.9	9.1	4.9	1.5	10.6	4	0.5	6.8	1.5	15.5	0.7	2.3	1.2	3.5	4	4	10.6	7.1	11.9	24.5	4.4	1.1	2	18.8	11.9	3	1.6	4.9	1.6	0	5.5	5.3	2.6	0.1	0.2	2.4	3.1	14.6	0.5	2.3	3.5
2001-01-15	2.7	12.9	14.1	10.5	0	1	1.3	0.6	0.1	22.2	1.3	0	1.2	0.4	9.5	0.4	0	0.7	6.8	7.2	6.5	0	0.1	0.1	1.2	2.2	3.9	0.9	1.3	0.6	4.2	6.2	54.5	11.7	1	0	0.2	0	42.1	15.4	0	9.1	0	13.8	7.8	1.1	9.5	7.2	0
2001-01-16	25.5	41.8	11.5	15.7	11.1	3.2	15.4	0.3	8.6	9.5	9.7	0.2	0.7	6.5	3	0.8	0.2	1.3	7.7	0.8	4.8	0.2	0.4	0.4	0.7	0.8	40.8	17.9	5.4	3.3	5	9.3	20.8	24.7	4.7	0.6	6.6	3.2	14.2	16.2	6.6	0.6	0.6	12.6	1.6	24.7	3	0.8	0.2
2001-01-17	0.2	0	0	0	6.9	2.1	15.5	6.1	8.3	0	10.6	7.9	5.7	7	11.7	0.9	7.9	1.9	9	16.6	5.2	8.2	6.7	6.7	5.7	3.9	16.1	18.8	25.3	7.6	24.7	16.6	1.2	6.1	0.1	5.5	0	0.7	8.2	7.3	2	0	0	10.4	0	0.1	11.7	16.6	8.2
2001-01-18	0	0	0	0	0	0.3	3.2	0	0.7	0	4.3	0	0	3.8	0	0.4	0	4.1	0	0	0	0.2	0	0	0	0	32.4	15.2	24.8	6	16.1	38	8.1	8	0	3.8	0.9	0.1	4.1	11	3.8	1	0.4	2.5	0	0	0	0	0.2
2001-01-19	0	0	0	0	3.3	0	0	0	0.3	0	0	0	0	0	0	0	0	0	0.2	0	0	0	0	0	0	0	0	1	0.3	16.3	10.9	2.3	9.9	1	2.4	6.1	7.3	2.3	1.1	0.6	37.7	0.1	0.3	0.6	0	0	0	0	0
2001-01-20	0	0	0.4	0	0.2	0	0.1	0	0	0	0	0	0	0	0	0	0	0	0	0	0	0	0	0	0	0	3.9	2	0.3	1.2	1.8	2.9	1.4	4.2	3.5	4.8	1.7	1.6	7.3	4.3	0.1	20.9	18.6	2.9	0	0.1	0	0	0
2001-01-21	8.2	5.6	22.9	0.4	0.2	7.2	0	0	0	0	0.2	0	0	0.5	0	0	0	0	0	0	0	0	0	0	0	0	0	0	0.1	0.5	1.3	0.3	5.1	6.7	2.7	1.2	1.8	1.7	4.2	0.6	1.5	1.2	8.1	2.6	0	0	0	0	0
2001-01-22	0.8	0	1.3	1.7	0	0.7	0	0	0	0	0	0	0	0.1	0	0	0	0	0	0	0	0	0	0	0	0.1	0	0.1	0	0.1	0.1	0.6	3.1	0.2	8.3	1.8	2.7	9.2	5.1	1.4	0.3	4	5.1	0	0	0.3	0	0	0
2001-01-23	0.3	0.1	0	0.1	2	48.4	0	0	14.5	0	0	0	0	0	0.4	0	0	0	4.8	0	1.3	0	0	0	0	0	0	0.7	0	0.3	0.5	0.7	4.1	0	5.1	19.3	1.6	1.8	3.6	13.9	0	16.6	9.5	0	10	1.7	0.4	0	0
2001-01-24	2.2	0.6	1.3	3.3	3	56.3	0	0.9	24	0	0.1	1.5	0.2	1.1	5.5	0	1.5	0.1	12	2.3	7.7	2.5	1.9	1.9	0.2	0.8	0	1.2	0	0.1	0.1	1.7	1.4	0	3.2	17.9	9.5	3	1.2	1.6	0.5	5.3	8.5	0	0	0	5.5	2.3	2.5
2001-01-25	4.9	1.3	10.4	8	36.1	64	0	3.4	14	0.2	0.4	4.8	0.5	0.1	1.9	0.5	4.8	0	3	1.2	2.4	4.1	3.6	3.6	0.5	0.3	1.2	0	0	0	0	0.9	0.7	0	4.1	11.1	12.4	2.2	4	16.7	0	12	1.9	5.3	0	0.4	1.9	1.2	4.1
2001-01-26	3.4	1.6	3.5	0.1	7.1	13.5	0.5	2.3	3.5	3.3	0.1	1.6	0.6	0.2	5.1	0.7	1.6	0.5	3.1	5.6	0.7	1.1	0.8	0.8	0.6	0.4	0.3	1.5	0.3	0.7	1.2	1.6	3.4	2.6	2.3	2.2	2.8	1.5	3.4	13.9	0.8	0	21.2	14.1	0	0	5.1	5.6	1.1
2001-01-27	2.3	0	0	0.2	46.2	4.8	0.5	7.1	16.9	13.8	0.5	7.7	1.7	0.2	8.2	2.5	7.7	1.6	8.1	9.7	2.8	6.8	3.4	3.4	1.7	1.5	1.9	5.7	2.4	2.2	2.6	7	11.4	2.1	14.1	2.1	4.9	4.6	0.4	1	1.9	0.7	0	3.1	0	0	8.2	9.7	6.8
2001-01-28	0.2	0	1.4	2	126.9	8.8	0.3	1.1	12.3	11.6	0.2	1.2	1.6	0.2	2.7	1.6	1.2	0.7	3.4	4	2	1.6	1.3	1.3	1.6	1.1	2.7	6.6	0.5	3.1	3.9	16.4	17.6	26	3.8	1.1	1.9	3.8	8.4	0.9	8.5	0.5	23.2	18.3	0	0	2.7	4	1.6
2001-01-29	0	1.5	0.3	5.4	8.5	14	3.5	0	0.4	1.2	5.3	0	3.1	7.3	0	1.1	0	4.4	0	0	0.1	0	0.1	0.1	3.1	4.4	2.3	2.3	1.2	0	0.2	2.2	1.4	0.2	1.8	5.2	1	0.1	9.2	3.3	0	2.6	0	16.5	0	0	0	0	0
2001-01-30	9.7	14.7	14.2	11.4	7.4	1.3	16.6	5.1	15	21.5	1	5.8	4	0	20.1	6.8	5.8	1	32.4	27.3	15.9	5.2	16	16	4	3.8	48.5	80.5	14.1	7.2	5.5	20.3	1.3	12.1	23.5	25.7	17.5	5	9.4	2.9	13.9	8.1	5.9	5.1	0	0.6	20.1	27.3	5.2
2001-01-31	35.5	28.4	13.8	76.6	34.9	31.3	6	62.4	21	14.1	23.2	95.2	24.7	42.3	40	23.6	95.2	9.7	25.8	42.6	29.7	80.1	60.2	60.2	24.7	34.3	62.5	89.6	27.3	7.1	25.6	37.7	8	25.1	2.3	0.2	0.1	0.4	0	0.4	11.6	29.1	0.5	3.5	21	22.4	40	42.6	80.1
2001-02-01	1.8	12.7	0	50.2	49	138.5	6	0.3	30.1	0	17.9	0.3	6.4	6.5	2.4	3.6	0.3	8.7	3.4	6.8	1.1	0.6	3.7	3.7	6.4	8.4	13.5	18.7	11.3	3.5	5.6	16	3.2	0.7	0.1	34.4	17.9	5.4	2.4	3.8	2.2	20.9	1.4	3.3	3.6	37	2.4	6.8	0.6
2001-02-02	0.1	6.2	0	4.7	6	83.4	1.3	0.1	4.1	0	0.3	0.5	0	0.2	26.6	0	0.5	0	21.2	22.9	0.8	0.5	0	0	0	0	0	1.2	0.7	0.6	0.8	1	9.5	2.4	4.4	7.3	9.2	6	0.5	0.2	1.7	34.2	1.5	0.9	11	3.7	26.6	22.9	0.5
2001-02-03	1.3	1.8	0	0.2	0	40.1	0	0	0.2	6.7	38.3	0	0	0.9	0	0	0	2.9	0	0	0	0	0	0	0	0	0.3	0	0	0	0.2	0	6.9	1.6	0.2	0.2	1.1	1.3	3.1	1.5	0.3	9.3	0.9	2.2	21.3	3.3	0	0	0
2001-02-04	71	30.8	93.2	69.5	31.9	0.1	22	14	33.6	77.6	2.4	7.3	7.4	7.1	25.5	8.9	7.3	11.8	32	26.9	5.5	5.8	2.2	2.2	7.4	6.6	1.6	0.4	2.5	1.2	0.7	0.2	1.9	0.1	0.1	0	0.1	0.1	6	6.9	1.2	47.4	4.1	11.8	25.4	6	25.5	26.9	5.8
2001-02-05	21	20.5	16.5	21.7	48.9	0	6.8	25.7	110.6	46.5	15.4	31.4	15.9	20.5	50.7	13.9	31.4	15.9	65.8	48.8	49.6	37	25.7	25.7	15.9	19.1	3	7.9	16.8	9.7	17.7	13.1	2.4	0.4	0.2	0.1	0.1	0	0.4	0	3.3	53.2	0	2	9.8	1.3	50.7	48.8	37
2001-02-06	7	26.9	4.4	34.8	11.8	0.1	6.8	16.7	10.6	4.1	4.6	18	11.3	5.8	46.4	8.4	18	4.9	27	39.3	16.3	19	15.8	15.8	11.3	14.1	2.5	0.7	4.2	2.7	2.2	0.7	13.8	18.2	0.9	1.1	0.5	0.5	5.5	4.8	4.1	5.9	0	2.5	9.7	0	46.4	39.3	19
2001-02-07	4.5	12.6	1.6	1	3.5	0.5	8.2	14.9	0	9.6	4.6	10.1	21.2	26.8	21.1	20	10.1	16.2	4.2	48	10.5	6.4	9.4	9.4	21.2	20.7	2.5	5.4	4.1	13.9	10.8	10.1	19.1	18.3	0.7	6.7	5.7	10.4	12	27.5	14.5	18.3	0	0	13	2.1	21.1	48	6.4
2001-02-08	32.4	4.4	36.8	3.4	68.3	5.2	13.7	38.7	76.6	12.3	16.6	36.3	11.1	14.2	29.7	15.4	36.3	15.5	68.4	20.6	12.6	25.3	19.6	19.6	11.1	15.2	1.7	4.3	7.3	1.6	2.9	10.1	16.2	10.1	4.6	16.7	11.6	8.4	0	0.1	1.4	10.6	1	0	15.3	10.5	29.7	20.6	25.3
2001-02-09	10.4	7.2	4.9	16.1	205.7	8.8	9.3	32.5	71.3	10.4	3.7	35.1	31.5	14.1	10.4	30.7	35.1	18.9	18.3	10.2	5.9	26.3	31.6	31.6	31.5	29.4	2.5	2.3	3.2	6.3	7.6	5	7.5	8.8	2.1	3.8	1.3	2.6	2.7	11.1	7.3	56.4	0.7	0	29	44.8	10.4	10.2	26.3
2001-02-10	18.2	12.4	18.4	2.7	22.3	17.2	15.1	8.2	6.6	2.4	3.9	5.5	4.4	7	29.3	5.5	5.5	2.8	27.5	39.8	7.4	5.4	3.1	3.1	4.4	3.3	6	11.4	0.5	4.8	2.4	4.6	16.7	9.1	7.7	3.4	3.6	4.6	3.1	3.9	9	1.9	2.4	0	5.1	5.7	29.3	39.8	5.4
2001-02-11	7	7.5	11.9	11.2	13.5	19.3	8.9	10.7	20.3	5.3	2.4	9.1	14.2	9.2	12	17.2	9.1	16.9	45.1	6.7	20.6	15.1	12.6	12.6	14.2	11.5	1.8	2.7	2	5.9	4.7	4.3	4	9.2	5	0.6	1.7	0.9	2.5	3	6.7	1.8	16.7	0.9	26.9	8	12	6.7	15.1
2001-02-12	38.7	4.7	31.9	9	8.9	6.1	16.3	20.9	20.8	2.3	6.8	14.8	10.7	12.7	4.6	11	14.8	6.7	28.6	18.1	23.6	12.9	11.2	11.2	10.7	12.9	6	2.2	4.3	11.5	3.6	1.8	4.8	7	1.5	3.4	1.8	0.7	8.4	14.5	7.2	15.6	11.9	0.6	1.3	5.1	4.6	18.1	12.9
2001-02-13	3.7	24.8	2	2.8	25.8	37.9	33.3	8.8	15.6	12.4	2.9	9.3	0.5	5	26.8	14	9.3	11.9	14.9	25.4	3.5	8.4	1.4	1.4	0.5	3.8	4.7	0.3	0	1.5	6	3.9	20.5	11.2	9.7	0.2	0.6	0.2	2.1	3.2	0.8	1.7	0.6	9.3	0.7	0.4	26.8	25.4	8.4
2001-02-14	14.4	24.8	16	8.3	4.9	11	0.2	5.4	24.6	5.1	0	5.2	0	8.8	4.6	3.5	5.2	3.1	12.2	4	1	1.1	0	0	0	0.2	5.4	12.1	0.8	22	6.1	20	7.8	0.5	2.9	0.7	0.1	1	1	10	8.7	13.3	17.4	1.9	0.1	6.4	4.6	4	1.1
2001-02-15	5.4	3.1	24.3	3.8	36.9	122.9	8.5	12.2	32.3	6.5	0	9.2	1.9	34.1	6.3	7.4	9.2	8.6	10.1	10.7	20	4.3	2.8	2.8	1.9	1.2	0.4	5.9	0.3	14.1	6.4	8.5	10.3	6.4	3.8	1.4	1.7	0.5	0.9	0.6	45.6	20.1	0.9	7.6	0	0	6.3	10.7	4.3
2001-02-16	4.5	9.9	10	11.7	12.9	60.7	43.9	20.4	17.7	1.2	0.8	20.3	9.3	25.3	65	9.7	20.3	12.1	55.2	46.7	55.7	20.6	12.6	12.6	9.3	2.5	49.2	8.2	0.8	6.3	3.8	3.9	12.2	0	4.2	0.1	0.3	0.3	0.1	0.5	7.8	8.8	10.2	6	0	0	65	46.7	20.6
2001-02-17	9.2	0.5	17.6	40.6	2.4	30	58.6	19.5	17.9	13.6	20.8	36.9	48.7	5	46.6	28.8	36.9	29	40.9	42.7	27.5	41.1	35.1	35.1	48.7	22.1	5.7	28.1	7.4	25	3.7	32.3	23.8	24.9	4.6	5.3	1.4	0.1	0.3	0	57.5	19.8	27.4	0.2	0	7.4	46.6	42.7	41.1
2001-02-18	7.6	0.1	14.9	144.5	3.3	14.3	39	15.9	17.8	0	34.1	26.9	50.3	22.8	44.5	18.8	26.9	19.5	39.4	29.5	30.5	46.8	51.8	51.8	50.3	48.9	16.9	54	8.8	40.3	6.4	44.1	97.4	15	0.9	1.8	0.9	0	4.8	0	6.8	42.6	13.2	0.2	1.3	12.2	44.5	29.5	46.8
2001-02-19	2.6	53.9	16.3	0.4	21.2	0.9	34.2	13.3	44.6	12.5	7.7	25.9	45.1	24.3	38.8	31.7	25.9	21	56.9	21.4	39.7	38.3	47.2	47.2	45.1	37.1	5.5	3.9	3.2	4.9	0.8	3.9	35.3	0.8	3.3	3.6	5.2	3.7	2.7	6.2	18.9	5.4	2.9	0.3	2.6	5.6	38.8	21.4	38.3
2001-02-20	3.1	26.5	2.3	8.1	0	0.6	1.9	0	0	0	1.2	0.1	0.8	0	0	0.7	0.1	1.7	0.1	0.1	0.1	0.9	4.3	4.3	0.8	2.8	0	0	1.3	0.3	2.6	0.4	1.2	2	1.1	2.5	4.2	4.3	3.7	4.8	0.7	0	0	1.9	0	0.4	0	0.1	0.9
2001-02-21	60	11.6	8.2	27.6	0.2	0	6.8	10.4	0.3	3.5	0.4	15.2	3.9	0.3	7.5	4.8	15.2	6.3	0.2	5.9	30.4	19.9	11.9	11.9	3.9	3.8	2.8	3.3	0.3	0.2	0.5	1.4	1.2	0	5.6	1.7	2.6	0.7	1.5	0	0.5	0.3	4.5	3.7	18.2	26.9	7.5	5.9	19.9
2001-02-22	63.4	41	42.7	15.9	1	1.1	22	3.8	0.2	11	17.2	6.2	5.4	25.8	11	3.5	6.2	8.3	12.9	6.1	16	9.5	6	6	5.4	7.1	12	0.7	0.8	1	0.5	1.7	1.4	2.6	3.4	7.9	1.5	1.6	7.6	3	4.4	29.7	4.9	3.8	3.1	22.4	11	6.1	9.5
2001-02-23	3.8	9.1	2.9	10.7	0.1	0.1	1.5	0.9	0	2.3	8.4	0.9	3	6.8	1.2	2.2	0.9	3.5	0.3	0.9	1.1	0.7	0.8	0.8	3	3.1	12.6	6.6	11.9	18.5	21.3	20.9	1.6	10.4	10	0.4	0.3	0.9	2.6	0.5	13.7	0	0	0.1	1.8	8.3	1.2	0.9	0.7
2001-02-24	3.1	0	4	0.4	0.8	1.5	4.5	1.1	7	23.2	2.7	1.4	1.9	2.2	1.3	2.2	1.4	5.9	3.3	1.3	3.7	2	1.1	1.1	1.9	1.9	3.1	3.6	0.6	1.3	1.5	6.3	5.8	2.4	3.3	8	0.3	0.1	0.1	0.1	0.7	21.2	0	0	0	0.2	1.3	1.3	2
2001-02-25	1.3	3.8	0.3	1.5	0.1	4.2	2.1	6.2	0.9	0.3	20.7	3.1	0.9	6.7	18.1	0.7	3.1	2.8	15.1	15.4	7.9	1.8	1.7	1.7	0.9	1	5.9	5	2.6	1.2	1.3	2.9	1.4	0.3	0	0	0	0	0	0.1	8.1	18.4	11.1	2.2	2.2	1.4	18.1	15.4	1.8
2001-02-26	1.1	0.6	0.4	10.9	8.3	2.1	1	5.8	0	1.9	6.5	3.6	8.2	6.1	1.5	6.3	3.6	3.1	0.4	1.1	13.5	4.2	10.1	10.1	8.2	9.8	4.6	3.7	2.6	2.6	6.3	11.1	1.1	0.6	0.2	0	0.1	0.1	1.9	0.5	1	15.5	0.5	0.3	1.3	1.9	1.5	1.1	4.2
2001-02-27	0	0	0	1.8	8.3	4.1	0.3	15	6.5	4.6	4.3	10	1.2	8.3	13	0.6	10	1.8	6.7	15.6	34.5	9.1	4.2	4.2	1.2	1.1	9.9	6.9	10.7	0.9	3.6	7.6	9.2	1.5	1.4	7.6	3.6	1.4	1.2	1	0.1	24.3	3.9	4.9	2.6	13	13	15.6	9.1
2001-02-28	0.7	8.2	3.2	20.2	6.1	8.9	0.6	69.7	22.4	1.2	3.2	65.4	10.1	0.5	7.2	4.4	65.4	0.3	5.4	9.9	51.8	33.4	58.5	58.5	10.1	8.9	5.7	18.6	11.3	7.7	8.7	31.3	2.5	23.5	10.6	5.3	11.9	7	1.2	0.4	24.2	3.3	0.1	4.5	8.6	0.8	7.2	9.9	33.4
2001-03-01	17.1	6.7	21.2	71.4	8	74	0.6	41.7	6.4	9.9	3.4	33.2	25.2	5.7	46.2	21.4	33.2	15.3	26.8	56.4	11.7	31.3	16	16	25.2	17.5	11.5	13.5	5.2	0.1	2.4	12.3	0.9	2.3	3.4	0.2	0.4	0.1	2.2	1.5	3	7.3	0.2	8.9	19.2	40.1	46.2	56.4	31.3
2001-03-02	40	10.5	33.4	0.4	0.9	11.3	0	44.8	3.4	14	0.1	27.1	0.7	0	2.2	0.8	27.1	0	2.6	8.6	12.3	7	3.6	3.6	0.7	0.7	0.4	13.2	5.1	2.5	3.8	17.1	3.5	3.9	4.2	2.3	11.1	9.4	6.1	12.9	0.4	0	0	0.1	0.3	0.5	2.2	8.6	7
2001-03-03	32.2	8.6	8	2.9	0	24.4	0.1	1.7	0.1	2.5	12.7	0	4.1	0.2	0	1.6	0	8.7	0	0	0.4	0	1.3	1.3	4.1	6.1	0.7	0.1	2.2	0.3	0.9	0.1	0.5	0.8	4	0	0.3	3.6	0.1	0.6	0	0	0	0	0	0	0	0	0
2001-03-04	0	0	0	0.2	2.7	5.3	20.6	1.3	13.6	57.9	2.9	3.5	10.6	20.2	12.8	11	3.5	9.6	6.4	7	9.9	6.5	1.4	1.4	10.6	8.7	2.3	12.7	3.9	9.1	6.8	11.2	6.8	9.9	0.9	2	2.1	1	1.3	0.1	24.4	0	0	0	0.6	0	12.8	7	6.5
2001-03-05	13.7	8	8.6	15.9	1.8	0.8	0.1	0.8	2.8	31.6	20.7	0.5	7.4	1.5	0	9.6	0.5	8.3	0	0	1.7	0.5	2.1	2.1	7.4	7.7	1.5	8	10.6	4.9	7.5	11.8	1.8	4.2	4.9	11.5	9.9	7.8	4.3	2.9	4.1	0.7	1.2	0	0.8	2.2	0	0	0.5
2001-03-06	0	0.4	0	0.1	0.3	0.2	0.9	1.8	0.5	5.2	3.5	1.1	2.5	1.9	0.2	3.2	1.1	1.4	0.1	0.2	1.7	1	1.7	1.7	2.5	1.4	0.5	0.4	1.4	0	0	2.7	1.1	2.1	1	0.3	0.1	0	1	5.8	0	4.4	0.1	10.1	3.2	0.2	0.2	0.2	1
2001-03-07	0.7	0.5	0.2	0.3	0	0.5	4.8	0	0	1	5.8	0	0	1.5	0	0	0	0	0	0	0.1	0	0	0	0	0	2	2.5	1.6	1.6	3.4	5.5	0.4	1.5	1.5	4	2.3	1.1	0.1	0.4	2.1	14.7	1.6	21.2	0.3	20.9	0	0	0
2001-03-08	0.5	0.5	1.4	0	0.5	0.3	3.4	0	3.9	24.5	3.6	0.6	0.7	2.7	5.3	0	0.6	0	7.8	0.7	5.3	2.5	1.7	1.7	0.7	1.1	1	1.8	1.2	7.1	5.3	4.1	8.3	7.2	4.4	6.8	1.8	1.6	3	7.7	3.7	7	5.2	20.4	7.7	1.4	5.3	0.7	2.5
2001-03-09	33.8	9	25.4	35	57.2	4.9	0.1	3	1.1	24	2	3.5	1.2	29.7	8.5	2.9	3.5	2.8	1	9.3	2.3	4.9	3.2	3.2	1.2	3.4	40.6	53.7	6.3	0	0.4	48.7	16.2	0.8	5.8	41	12.6	2.1	0	7	1	7.8	0.2	1.9	27.9	7.5	8.5	9.3	4.9
2001-03-10	3.8	2.9	8.9	6.7	0	0.5	6.9	0.1	0	11.3	45	0	6.7	3.1	0	6.6	0	30.6	0	0	27.2	0	0	0	6.7	0	3.9	6.8	39.9	4.6	9	12.3	9.7	16.1	6.5	0.9	0.8	0	13.1	6.3	1	19.8	0	0	1.1	1.6	0	0	0
2001-03-11	1.8	19.4	2	5.1	0	1.5	3.1	0	4.5	8.5	0	0.5	2.7	0	0	1.9	0.5	0.8	0	0	0.4	2.5	11.9	11.9	2.7	6.3	0	0.8	0	0.5	1.2	2.4	16.3	0.4	22.3	3.4	12.5	8.5	4.8	9.6	1.3	32.8	0.9	41.8	0	2.4	0	0	2.5
2001-03-12	20.6	10	36.5	11.6	1.2	1.1	19.2	22.6	1.9	9.1	12.3	14.7	27.1	11.5	6.5	24.1	14.7	27.6	2.7	10	4.9	22.2	10.6	10.6	27.1	13	10.3	29.1	22.9	11.8	19.9	17.3	13.2	21.7	0.6	6.5	5.9	14.1	12.1	16.7	27.4	32.6	0.3	5.5	0.1	0	6.5	10	22.2
2001-03-13	22.3	11.2	24.5	2	6.5	2.7	1.7	2.7	4.8	14.9	0.2	0.6	2.6	0.1	1.8	6.7	0.6	4.4	8.9	1.9	5.2	2.7	0.6	0.6	2.6	0.2	2.6	22.5	2.2	0.2	0.1	28.6	7.3	0	6.6	6.4	3.9	3.8	21.1	4.3	0.1	4.7	0	5.9	22.3	16.9	1.8	1.9	2.7
2001-03-14	10	3.5	44	3.2	27.9	12.3	8.9	15.3	7.5	6.2	8.1	11.5	7.2	3.8	18.5	17.3	11.5	13.8	16.8	14.9	19.2	21.1	18.7	18.7	7.2	4.9	0.3	1.1	6	1.7	2.4	14.5	10	1.1	0.5	2.2	4.3	2.2	11.7	22.9	3	9.7	1	0.7	0	0	18.5	14.9	21.1
2001-03-15	9.8	0	14.5	0	0.4	0	0.2	0.8	0	0	4.3	2.4	2.7	4.8	0	2.4	2.4	11.4	0	0	3	4	3.4	3.4	2.7	3.8	1	0.1	0.7	4.6	7.8	9.5	21.2	0	0.7	10.6	1.7	1.2	7.9	3	7.7	0	6.8	1	0	0	0	0	4
2001-03-16	3.9	0.3	1	0.1	3.1	0	16.3	0	0	0.5	2	0	12.1	1.4	2.8	15.6	0	4.8	0	0	0	0	0.9	0.9	12.1	7.2	0	0	1.8	0.1	1.1	4.5	25.9	0.2	3.1	6.5	0.9	0.1	0	2.8	1.7	1.4	6.2	2.6	4.9	0	2.8	0	0
2001-03-17	0.6	0.1	1.3	0.4	1.6	0.7	17.6	5.4	0.2	0	9.8	6.6	4.4	3.2	13.5	6.4	6.6	15	1.7	12.6	17.2	9.4	6.9	6.9	4.4	2.8	1.5	19.1	7	3.1	0.5	8.5	20.4	4	1.1	0.1	0	0	0	0	20.1	0	2.2	6.5	0.1	0.5	13.5	12.6	9.4
2001-03-18	0.7	10.5	0	1.5	0.5	2.5	7.5	3.3	17.4	29.6	27	3.6	5.1	0.7	20.5	11	3.6	20.6	12.4	18.9	9.2	5.3	1	1	5.1	1.7	13.2	3.3	0.4	13.9	9.2	7.5	16.4	0.2	4.6	7.7	0	0	0	0.1	10.6	0.4	0	28.6	0	0	20.5	18.9	5.3
2001-03-19	7.1	6.7	0.9	24.7	14.1	14.4	13.4	20.4	22.2	21.9	32.5	21.1	44.6	58.6	23.3	43.5	21.1	113.1	63.4	24.8	38.7	21.7	22.1	22.1	44.6	43.8	6.8	9.3	0.2	16.9	10.5	18.3	4.3	4.3	5.4	22.2	16.2	2.6	51.7	22	26.6	0.4	11.2	5.7	0.1	0	23.3	24.8	21.7
2001-03-20	0	11.8	0	0	1	45.9	18	1.9	18.2	6	8.7	0.8	3.2	15	2.5	7.3	0.8	7.9	3.6	3.3	41.8	2.3	11.9	11.9	3.2	15	12.6	24	12.3	1.3	5.9	35.1	14.4	2.6	26.5	20.9	15	1	2.5	5.1	0.2	0.6	19.5	3.7	0	0	2.5	3.3	2.3
2001-03-21	0	1.6	0	0	1.3	52.8	9.2	0.6	1.2	2.7	0	0	0	12.8	0.6	0	0	0.1	6.3	0	18.4	5	4.5	4.5	0	0.5	16.6	13	18.6	36.8	14	8.8	1.3	3.5	5.5	16.7	13	14.2	2.1	1	37.8	0.2	2.1	0	0	0	0.6	0	5
2001-03-22	23.7	6.6	8.3	40.3	30.4	22.5	3.8	2.6	47.9	0.3	0.5	5	14.3	4	11.3	10.4	5	9	16.2	11.9	7.7	10.2	18.4	18.4	14.3	21.3	10.4	15.3	4.8	4.4	2.8	13.3	0.4	2.5	1.8	1.4	1.7	1.8	6.9	2.3	12.9	0.6	0.2	0	1.4	0	11.3	11.9	10.2
2001-03-23	0	0	0	0	0	0	4.5	0.2	0	0	1	0.1	0.1	0.5	0.3	0	0.1	0.4	0.1	0.1	0.7	0	0.3	0.3	0.1	0.6	1.6	0.6	3.6	12.8	9.5	6	7.8	0.8	7.6	6	2.5	5.1	3.1	3	19.3	0.7	7.2	2.2	20.1	2.6	0.3	0.1	0
2001-03-24	0	0	0	0	0	0	0	0	0	0	0	0	0	0	0	0	0	0	0	0	0	0	0	0	0	0	0	0.4	1.6	7.9	2.4	2.2	4	9.9	5.1	3.5	1.3	1.2	0.3	2.8	11.2	9	0.2	19	53.2	11.8	0	0	0
2001-03-25	0	0	0	0	0	0	0	0	0	0	0	0	0	0	0	0	0	0	0	0	0	0	0	0	0	0	0	0.7	0	0	0	1.1	0.5	7.4	8.8	23.6	20	9.4	8.5	4.5	0	0	0	0.8	38.4	2.5	0	0	0
2001-03-26	0	0.3	0	1	0.1	0	0	0	0	0	0	0	0	0	0	0	0	0	0	0	0	0	0	0	0	0	0	0.1	6.2	10.6	0.9	0	4.8	0.2	0	9.4	0.1	0.1	1.5	0.2	20.3	0	1.8	4.1	8.5	9.3	0	0	0
2001-03-27	0	0.1	0	0	1.4	6.5	1.5	0	2.1	0	1	0	0	5	0	0.1	0	1	5.3	0	47.3	2.1	3.4	3.4	0	0.6	14.6	4.5	7.5	3.1	1.7	2.3	36.8	2.7	0	7	7.6	0.9	3.9	1.5	7.8	1.6	4.4	4.1	0	0	0	0	2.1
2001-03-28	0	0	0	0	0.2	7.6	17.6	0	0	0	0	0	0.8	0.4	0	0.4	0	4.5	1	0	6.9	0.1	0	0	0.8	0	6.4	7.7	0	13.5	0.1	24.5	71.9	3.3	6.7	12.2	6.4	8.1	18.1	26.1	6.2	0.1	2.3	9.9	0	0	0	0	0.1
2001-03-29	0	0	0	0	0	0	0	0	0	0	1.8	0	0.1	3.2	0	0	0	0	0	0	0	0	0	0	0.1	0.4	17.3	8	13.7	4.2	8.2	21.2	11.9	0.8	21.3	39.8	29.1	10.2	14.3	5.7	2.9	1.5	0.4	0.2	0	0	0	0	0
2001-03-30	0	0	0	0	0	0	2.7	0	9.7	0	0.2	0	0	0	0	0	0	0	0	0	0.2	0	0	0	0	0	1.9	0	0	0	0	0.6	3.7	0.2	2.8	4.4	1.4	0.1	6.2	3.7	0	0	1.6	7.3	0	0	0	0	0
2001-03-31	1	0	0	0.4	0	0	2.3	0	0	0	0.2	0.6	0	0.1	0	0.1	0.6	1.5	0	0	1.7	2.5	0	0	0	0	0.3	0	0.2	0	0.1	1.9	0	1.5	2.9	3.2	10	1.6	3.5	0.1	0	0	0.2	0.1	0	0	0	0	2.5
2001-04-01	0	0	0	0	0	4.4	13.2	56.2	0	0	0	30	15.5	0.9	1.9	20.5	30	0.4	1.8	0	22	30.5	29.4	29.4	15.5	4	2.8	0	0	0	0.4	0.3	3.4	0.3	1.8	1.1	4.1	2	14	7.7	0	0	0.1	0	0	0	1.9	0	30.5
2001-04-02	0	0	0	0	3.2	3.3	27.4	0	0	0	0	0.2	6.6	2.4	18.6	2.9	0.2	1.9	4.6	7.9	0	0.3	2.6	2.6	6.6	2.2	0	0	0	0	0	11	8.9	0.3	2.2	28.6	17.2	5.3	6	2.3	2.3	0	2.7	2	0.1	0.1	18.6	7.9	0.3
2001-04-03	0	0	0	0.3	0	0	1.2	0.1	0	0	1.3	0.7	9.4	0	0	10	0.7	2.9	0	0	0	0.9	3.1	3.1	9.4	2.5	0	4.1	0	0.2	0.1	6	0	0	0	0.2	0	0	0	0.7	2.5	0	1	5.2	0	0	0	0	0.9
2001-04-04	0	1.7	0	0	0	0.6	0.8	0	0	0	0.2	0	0.6	0.2	0	1.8	0	0.2	0	0	0	0	0.4	0.4	0.6	0.1	0.2	1.5	0.1	0.2	0.8	1.1	8.6	0	0.8	0.6	0.2	0	0.2	4.3	2.3	0.6	0.1	0	0.3	3.2	0	0	0
2001-04-05	0	0	0	0	0	2.2	0	0.6	0.5	0	0	0	0	0.5	0	0	0	0	0	0.8	0	0	0	0	0	0	0	0	0	0	0	0	0	0	1.5	2.5	4.6	1.3	0	0	0	1.5	1	3.3	0	0	0	0.8	0
2001-04-06	0	0	0	0	0.2	0.1	0	3.3	0	0	0	1.1	0	0	0.8	0.1	1.1	0	0.8	0.8	0	0.2	0	0	0	0	0	0	0	0	0	0	0	0	0	0	0	0	0.5	0	0	0	0	2.9	0	0	0.8	0.8	0.2
2001-04-07	0	0	0	0	0	0	0	0	0	0	0	0	0	0	0	0	0	0	0	0	0	0	0	0	0	0	0	0	0	0	0	0	0	0	0	0	0	0	0	0	0	0	0	0	0	0.6	0	0	0
2001-04-08	0	0.6	0	0	0	0	0	0	0	0	0	0	0	0	0	0	0	0	0	0	0	0	0	0	0	0	0	0	0	0	0	0	0	0	0	0	0	0	0.4	0	0	0	0	0	0	0	0	0	0
2001-04-09	0	0	0	0	0	4.5	0	0	0	0	0.1	0	0	0	0	0	0	0	0	0	0.2	0	0	0	0	0	0.1	1.6	0	0	0	0	0	0	0	1.1	0	0	0.1	0	0	1	0	0.1	6.7	8	0	0	0
2001-04-10	0	0	0	0	0	0	0	0	0	0	0	0	0	0	0	0	0	0	0	0	0	0	0	0	0	0	0	0.5	0	0	0	0	0	0	0	0	0	0	0	0	0	5.6	0.1	0	0	1.1	0	0	0
2001-04-11	0	0	0	0	0	2.9	0	0	0	0	0	0	0	0	0	0	0	0	0	0	0	0	0	0	0	0	0.4	0	0	0	0	0	0	0	0	0	0	0	2.1	5.1	0	5.8	0	4	0	0	0	0	0
2001-04-12	0	0	0	0	0	0	0	0	0	0	0.1	0	0	1.2	0	0	0	0.5	0	0	0	0	0	0	0	0	0	0	0	0	0	0	0	0	0	0	0	0	0.5	0	0	0.6	0	0	0	0	0	0	0
2001-04-13	0	0	0	0	0	0	0	0	0	0	0	0	0	0.3	0	0	0	0	0	0	0	0	0	0	0	0	0	0	0	0	0	0	0	0	0	0	0	0	0	0	0	0	0	0	0	0	0	0	0
2001-04-14	0	0	0	0	0	0	0	0	0	0	0	0	0	0	0	0	0	0	0	0	7.5	0	0	0	0	0	0	0	0	0	0	0	0	0	0	0	0	0	0.2	0.1	30	0	0	0	0	0	0	0	0
2001-04-15	0	0	0	0	0	0	0	0	0	0	0	0	0	0	0	0	0	0	0	0	0	0	0	0	0	0	0	0	2.7	0	0	0	0	0	0	0	0	0	0.7	0.2	0	0	0.1	0	0	0.1	0	0	0
2001-04-16	0	0	0	0	0	0	0	0	0	0	0	0	0	1.4	0	0	0	0	0	0	0	0	0	0	0	0	0	0	0	0	0	0.6	0	0	1.4	2.3	3.4	8.9	3.4	2.4	0	0	0	0.7	0	0	0	0	0
2001-04-17	0	0	0	0	0	0.2	0	0	0	0	0	0	0	0	0	0	0	0	0	0	0	0	0	0	0	0	0	0.7	5.4	0	0	0	0	0	5	4.4	10.7	0	7.6	11.3	0	0	0	0.2	0	0	0	0	0
2001-04-18	0	0	0	0	0	0	0	0	0	0	0	0	0	5.7	0	0	0	0	0	0	0	0	0	0	0	0	0	0	0	0	0	1.3	0	0	0.5	2.1	4	2.3	38.5	7.2	0	0	0.9	0	0	0	0	0	0
2001-04-19	0	0	0	0	0	0.4	0	0	0	0	0	0	0	0	0	0	0	0	0	0	0	0	0	0	0	0	0	0	0	0	0	0.1	0	0	0	0	0.5	5.8	2.6	16	0	0	3.6	0	0	0	0	0	0
2001-04-20	0	0	0	0	0	0	0	0	0	0	0	0	0	0	0	0	0	0	0	0	0	0	0	0	0	0	0	0	0	0	0	0	0	0	0	4.9	0.3	0	8.3	6.4	0	21.6	0	0	0	0	0	0	0
2001-04-21	0	0	0	0	0	1.1	0	0	0	0	0	0	0	0	0	0	0	0	0	0	0	0	0	0	0	0	0	0	0	0	0	0	0	0	0	75.8	4.5	0	6.9	2.5	0	0	0.7	0	0	0	0	0	0
2001-04-22	0	0	0.1	0	0	0	0	0	0	0	0	0	0	0.2	0	0	0	0	0	0	0	0	0	0	0	0	0	0	0	0	0	0	0	0	0	0	0	0.1	21	2.7	0	0	0	0	0	0	0	0	0
2001-04-23	0	0	0	0	0	0	0	0	0	0	0	0	0	0	0	0	0	0	0	0	0	0	0	0	0	0	0	0	0	0	0	0	0	0	0	0	0	0	13.5	0	0	0	0	0	0	0	0	0	0
2001-04-24	0	0	0	0	0	0	0	0	0	0	0	0	0	0	0	0	0	0	0	0	0	0	0	0	0	0	0	0.1	0	0	0	0.6	0	0	0	0	0	0	0.2	0.9	0	0	0.1	0	0	0	0	0	0
2001-04-25	0	0	0	0	0	0.2	0	0	0	0	0	0	0	2.2	0	0	0	0	0	0	0	0	0	0	0	0	0.3	0.1	0	0	0	1.8	0	0	0	0	0	0	0	0.5	0	2.5	0	0.2	0	0	0	0	0
2001-04-26	0	0	0	0	0	0	0	0	0	0	0	0	0	0	0	0	0	0	0	0	0	0	0	0	0	0	0.3	0	0	0	0	0	0	0	0	0	0	0	0	0.2	0	25.6	0	0	0	0	0	0	0
2001-04-27	0	0	0	0	0	2.8	0	0	0	0	0	0	0	0	0	0	0	0	0	0	0	0	0	0	0	0	0	1.6	0	0	0	0.4	0	0	0	0	0	0	0	0.4	0	9.7	0	0	0.6	0	0	0	0
2001-04-28	0	0	0	0	0	0	0	0	0	0	0	0	0	0	0	0	0	0	0	0	0	0	0	0	0	0	0	0	0	0	0	0	0	0	0	0	0	0	0	0	0	0.4	0	0.9	0.1	0.3	0	0	0
2001-04-29	0	0	0	0	0	0	0	0	0	0	0	0	0	0	0	0	0	0	0	0	0	0	0	0	0	0	0	0	0	0	0	0	0	0	0	0	0	0	0	0	0	0	0	0	0	0.6	0	0	0
2001-04-30	0	0	0	0	0	0.3	0	0	0	0	0	0	0	0	0	0	0	0	0	0	1	0	0	0	0	0	1.7	0	0	0	0	0	0	0	0	0	0	0	0	0	0	0	0	0	0	0	0	0	0
2001-05-01	0	0	0	0	0	1	0	0.9	0	0	0	0	0	0.2	0	0	0	0	0	0	0	0	1.6	1.6	0	0.7	1	0	0	0	0	0.7	0	0	0	0	0	0	0	0	0	0	0	0	0	0	0	0	0
2001-05-02	0	0	0	0	0	0.6	0	0	0	0	0	0	0	0.3	0	0	0	0	0	0	0	0	0	0	0	0	0	2.8	0	0	0	0.6	0	0	0	0	0	0	0	0	0	0	0	0	0	0	0	0	0
2001-05-03	0	0	0	0	0	1.8	0	0	0	0	0	0	0	0	0	0	0	0	0	0	0	0	0	0	0	0	0.3	0	0	0	0	4.8	0	0	0	0	0	0	0	0	0	0	0	0	0.1	0	0	0	0
2001-05-04	0	0	0	0	0	0.8	0	0	0	0	0	0	0	3.4	0	0	0	0	0	0	0	0	0	0	0	0	2.7	0	0	0	0	21.2	0	0	0	0	0	0	0	0	0	0	0	0	0	0	0	0	0
2001-05-05	0	0	0	0	0.1	0	0	0	0	0	0	0	0	0.3	0	0	0	0	0	0	0	0	0	0	0	0	0	0	0	0	0	0	0	0	0	0	0	0	0	0	0	0	0	0	0.3	0	0	0	0
2001-05-06	0	0	0	0	0	0	0	0	0	0	0	0	0	11.3	0	0	0	0.3	0	0	0	0	0	0	0	0	0	0	0	0	0	0	0	0	0	0	0	0	0	0	0	0	0	0	0	0	0	0	0
2001-05-07	0	0	0	0	0	4.2	0	0	0	0	0	0	0	1.4	0	0	0	0	0	0	0	0	1.3	1.3	0	10.9	0.3	0	0	0	0	0	0	0	0	0	0	0	13.7	9.1	0	0	0	0	0	0	0	0	0
2001-05-08	0	0	0	0	0	7.2	0	0	0	0	0	0	0	0	0	0	0	0	0	0	0	0	0	0	0	0	0	0	0	0	0	0	0	0	0	0	0	0	0	0	10.4	0	0	0	0	0	0	0	0
2001-05-09	0	0	0	0	0	0	0	0	0	0	0	0	0	11.8	0	0	0	0	0	0	0	0	1.3	1.3	0	0	0	0	0	0	0	0	0	0	0	0	0	0	0	0	0	0	0	0	0	0	0	0	0
2001-05-10	0	0	0	0	0	0.2	0	0	0	0	0	0	0	0	0	0	0	0	0	0	0	0	0	0	0	0	1.4	0	0	0	0	0	3.3	0	0	0	0	0	0	0	0	0	0	0	0	0	0	0	0
2001-05-11	0	0	0	0	0	3.5	0	0	0	0	0	0	0	0	0	0	0	0	0	0	0	0	0	0	0	0	0	5.6	0	0	0	3	0	0	0	0	0	0	0	0	0	0	0	0	0	0	0	0	0
2001-05-12	0	0	0	0	7.3	0.1	0	0	2.7	0	0	0	0	0	0	0	0	0	0	0	0	0	0	0	0	0	0	0	0	0	0	0.2	0	0	0	0	0	0	0	0	0	0	0	0	0	0	0	0	0
2001-05-13	0	0	0	0	0	0	0	0	0	0	0	0	0	0	0	0	0	0	0	0	0	0	0	0	0	0	0	0	0	0	0	3.8	0	0	0	0	0	0	0	0	0	0	0	0	0	0	0	0	0
2001-05-14	0	0	0	0	0	0	0	0	0	0	0	0	0	0	0	0	0	0	0	0	0	0	0	0	0	0	3.2	0	0	0	0	0	0	0	0	0	0	0	0	0	0	0	0	0	0	0	0	0	0
2001-05-15	0	0	0	0	0	0	0	0	0	0	0	0	0	0	0	0	0	0	0	0	0	0	0	0	0	0	1.5	0	0	0	0	0	0	0	0	0	0	0	0	0	0	0	0	0	0	0	0	0	0
2001-05-16	0	0	0	0	0.1	0	0	0	0	0	0	0	0	0	0	0	0	0	0	0	0	0	0	0	0	0	2	4.1	0	0	0	0	0	0	0	0	0	0	0	0	0	0	0	0	0	0	0	0	0
2001-05-17	0	0	0	0	0	2	0	0	0	0	0	0	0	15.3	0	0	0	0	0	0	0	0	0	0	0	0	0	11.5	0	0	0	0.9	0	0	0	0	0	0	0	0	0	0	0	0	0	0	0	0	0
2001-05-18	0	0	0	0	0	0	0	0	0	0	0	0	0	7.2	0	0	0	0	0	0	0	0	0	0	0	0	0.6	0	0	0	0	1.6	0	0	0	0	1.9	0	9	0	0.1	0	0	0	0	0	0	0	0
2001-05-19	0	0	0	0	0	0	0	0	0	0	0	0	0	9	0	0	0	0	0	0	0	0	0	0	0	0	0	0	0	0	0	0.2	0	0	0	0	0	0	0	0	0	0	0	0	0	0	0	0	0
2001-05-20	0	0	0	0	0	0.2	0	0	0	0	0	0	0	0	0	0	0	0	0	0	0	0	0	0	0	0	0	0	0	0	0	7	0	0	0	0	0	0	0	0	0	0	0	0	0	0	0	0	0
2001-05-21	0	0	0	0	0	0	0	0	0	0	0	0	0	4.2	0	0	0	0	0	0	0	0	0	0	0	0	0	0	0	0	0	0	0	0	0	0	0	0	0	0	0	0	0	0	0	0	0	0	0
2001-05-22	0	0	0	0	0	0	0	0	0	0	1.4	0	0	0.8	0	0	0	0	0	0	0	0	0	0	0	0	8.7	0	0	0	0	0.7	9.3	0	0	0	0	3.8	0	0	0	0	0	0	0	0	0	0	0
2001-05-23	0	0	0	0	0	0	0	0.2	0	0	0.4	0.1	0	0	0	0	0.1	0	0	0	0	0	0	0	0	0	0	0	0	0	0.3	0	3.4	0	0.3	1.1	2.8	12.4	6.1	0	0	0	0	0	0	0	0	0	0
2001-05-24	0	0	0	0	0	0	0	0	0	0	0	0	0	1.9	0	0	0	0	0	0	0	0	0	0	0	0	0.8	0	0	0	0	0	0	0.1	0	5.1	1.6	0.6	1.9	0.4	0.1	0	0	0	0	0	0	0	0
2001-05-25	0	0	0	0	0	0.4	0	0	0	0	0	0	0	0	0	0	0	0	0	0	0	0	0	0	0	0	4.6	0	0	0	0	12	0	0	0	0	0	0	0	0	0	0	0	0	0	0	0	0	0
2001-05-26	0	0	0	0	0	0	0	0	0	0	0	0	0	0	0	0	0	0	0	0	0	0	0	0	0	0	0	9.1	0	0	0	0	0	0	0	0	0	0	0	0	0	0	0	0	0	0	0	0	0
2001-05-27	0	0	0	0	0	0	0	0	0	0	0	0	0	0	0	0	0	0	0	0	0	0	0	0	0	0	0.4	0.3	0	0	0	0	0	0	0	0	0	0	0	0	0	0	0	0	0	0	0	0	0
2001-05-28	0	0	0	0	0	0.1	0	0	0	0	0.8	0	0	3.1	0	0	0	0	0	0	0	0	0	0	0	0.2	0	3.5	0.1	0	0	3.8	0	0	0	0	0	0	2.1	0.5	0	0	0	0	0	0	0	0	0
2001-05-29	0	0	0	0	0	2.2	0	0	0	0	0.6	0	0	1.6	0	0	0	0	0	0	0	0	0	0	0	0	5.9	10.6	2.9	0	0	0	0	0	0	0	0	0	0	0	0	0	0	0	0	0	0	0	0
2001-05-30	0	0	0	0	0	0	0	0	0	0	0.8	0	0	0	0	0	0	0	0	0	0	0	0	0	0	0	0.4	13.4	0	0	0	7.5	0	0	0	0	2.2	0	4.5	0	0	0	0	0	0	0	0	0	0
2001-05-31	0	0	0	0	0	0	0	0	0	0	0	0	0	0	0	0	0	0	0	0	0	0	0	0	0	0	0	0	0	0	0	0	0	0	0	0	0	0	0	0	0	0	0	0	0	0	0	0	0
2001-06-01	0	0	0	0	0	5	0	0	0	0	0	0	0	0	0	0	0	0	0	0	0	0	0	0	0	0	1.6	0	0	0	0	0	0	0	0	0	0	0	0	0	0	0	0	0	0	0	0	0	0
2001-06-02	0	0	0	0	0	0	0	0	0	0	0	0	0	0	0	0	0	0	0	0	0	0	0	0	0	0	2.8	16.3	0	0	0	3.5	0	0	0	0	0	0	0	0	0	0	0	0	0	0	0	0	0
2001-06-03	0	0	0	0	0	0	0	0	0	0	0	0	0	0	0	0	0	0	0	0	0	0	0	0	0	0	8	0	0	0	0	1.8	0	0	0	0	0	0	4	0	0	0	0	0	0	0	0	0	0
2001-06-04	0	0	0	0	0	2.2	0	0	0	0	0	0	0	0	0	0	0	0	0	0	0	0	0	0	0	0	8.8	0	0	0	0	0	0	0	0	0	0	0	0	0	0	0	0	0	0	0	0	0	0
2001-06-05	0	0	0	0	0	0.9	0	0	0	0	0	0	0	0	0	0	0	0	0	0	0	0	0	0	0	0	8.1	0	0	0	0	12.9	0	0	0	0	4.7	0	6.2	0	0	0	0	0	0	0	0	0	0
2001-06-06	0	0	0	0	0	1.7	0	0	0	0	0.2	0	0	0	0	0	0	0	0	0	0	0	0	0	0	0	1.4	11.3	0	0	0	9.1	0	0	0	0	0	0	0	0	0	0	0	0	0	0	0	0	0
2001-06-07	0	0	0	0	0	0	0	0	0	0	0	0	0	0	0	0	0	0	0	0	0	0	0	0	0	0	2.1	0	0	0	0	0	0	0	0	0	0	0	0	0	0	0	0	0	0	0	0	0	0
2001-06-08	0	0	0	0	0	0	0	0	0	0	0	0	0	0	0	0	0	0	0	0	0	0	0	0	0	0	3.4	7.2	0	0	0	0	0	0	0	0	0	0	0	0	0	0	0.4	0	0	0	0	0	0
2001-06-09	0	0	0	0	0	15.9	0	0	0	0	0	0	0	0	0	0	0	0	0	0	0	0	0	0	0	0	0	0	0	0	0	10.3	0	0	0	0	0	0	0	0	0	0	0	0	0	0	0	0	0
2001-06-10	0	0	0	0	0	0	0	0	0	0	0	0	0	0	0	0	0	0	0	0	0	0	0	0	0	0	1.6	0	0	0	0	5.3	0	0	0	0	0	0	0	0	0	0	0	0	0	0	0	0	0
2001-06-11	0	0	0	0	0	5.8	0	0	0	0	0	0	0.1	1.6	0	0	0	0	0	0	0	0	0.1	0.1	0.1	0	1	1	0	0	0	3.5	0	0	0	0	1.9	0	1.5	0	0	0	0	0	0	0	0	0	0
2001-06-12	0	0	0	0	0	0.4	0	0	0	0	0	0	0	0	0	0	0	0	0	0	0	0	0	0	0	0	1.6	0	0	0	0	1	0	0	0	0	0	0	26.5	0	0	0	0	0	0	0	0	0	0
2001-06-13	0	0	0	0	0	0.1	0	0	0	0	0	0	0	6.6	0	0	0	0	0	0	0	0	0	0	0	0	0.5	4.1	0	0	0	0.9	0	0	0	0	0	0	7.9	0	0	0	0	0	0	0	0	0	0
2001-06-14	0	0	0	0	0	0.1	0	0	0	0	0	0	0	3.3	0	0	0	0	0	0	0	0	0	0	0	0	2	5.4	0	0	0	4.2	0	0	0	0	0	0	0	0	0	0	0	0	0	0	0	0	0
2001-06-15	0	0	0	0	0	0	0	0	0	0	0	0	0	4.1	0	0	0	0	0	0	0	0	0	0	0	0	0	0	0	0	0	0	0	0	0	0	0	0	0	0	0	0	0	0	0	0	0	0	0
2001-06-16	0	0	0	0	0	0	0	0	0	0	0.5	0	0	2.7	0	0	0	0	0	0	0	0	0	0	0	0	1	4.6	1.5	0	0	0	0	0	0	0	0	0	1.8	0	0	0	0	0	0	0	0	0	0
2001-06-17	0	0	0	0	0	0	0	0	0	0	0	0	0	0	0	0	0	0	0	0	0	0	0	0	0	0	3.1	0	0	0	0	13.8	0	0	0	0	0	0	0.5	0	0	0	0	0	0	0	0	0	0
2001-06-18	0	0	0	0	0	0	0	0	0	0	0	0	0	0	0	0	0	0	0	0	0	0	0	0	0	0	7.8	0	0	0	0	8.1	0	0	0.2	4	0	0	0	0	0	0	0	0	0	0	0	0	0
2001-06-19	0	0	0	0	0	4.6	0	0	0	0	0	0	0	0.8	0	0	0	0	0	0	0	0	2.6	2.6	0	0	1.2	0.8	0	0	0	1.1	0	0	0.2	0.2	0	0	0	0	0	0	0	0	0	0	0	0	0
2001-06-20	0	0	0	0	0	0.3	0	0	0	0	0	0	0	1	0	0	0	0	0	0	0.1	0	0	0	0	0	3.9	0	0	0	0	0	0	0	0	4.1	0	0	0	0	0	0	0	0	0	0	0	0	0
2001-06-21	0	0	0	0	0	0	0	0	0	0	0	0	0	0	0	0	0	0	0	0	0	0	0	0	0	0	9.2	0	0	0	0	0	0	0	0	0	0	0	0	0	0	0	0	0	0	0	0	0	0
2001-06-22	0	0	0	0	0	0	0	0	0	0	0	0	0	0	0	0	0	0	0	0	0	0	0	0	0	0	3.1	0	0	0	0	0	0	0	0	0	0	0	0	0	0	0	0	0	0	0	0	0	0
2001-06-23	0	0	0	0	0	0	0	0	0	0	0	0	0	0	0	0	0	0	0	0	0	0	0	0	0	0	0	0	0	0	0	0	0	0	0	0	0	0	0	0	0	0	0	0	0	0	0	0	0
2001-06-24	0	0	0	0	0	12.1	0	0	0	0	0	0	0.2	1.1	0	0.2	0	0	0	0	0	0	0	0	0.2	0.7	12.4	0	0.2	0	0	8.4	0	0	0	0	0	0	0	0	0	0	0	0	0	0	0	0	0
2001-06-25	0	0	0	0	0	4.9	0	0	0	0	0	0	0	0	0	0	0	0	0	0	0	0	0	0	0	0	11.3	0	0	0	0	5.9	2.8	0	0	0	0	0	0	0	0	0	0	0	0	0	0	0	0
2001-06-26	0	0	0	0	0	0.5	0	0	0	0	0	0	0	0	0	0	0	0	0	0	0	0	0	0	0	0	6.3	0	0	0	0	2.5	0	0	0	0	0	0	0	0	0	0	0	0	0	0	0	0	0
2001-06-27	0	0	0	0	0	1.7	0	0	0	0	0.5	0	0	1.2	0	0	0	0	0	0	0	0	0	0	0	0	2.3	8	0	0	0	0	0	0	0	0	0	0	0	0	0	0	0	0	0	0	0	0	0
2001-06-28	0	0	0	0	0	0.3	0	0	0	0	0	0	0	0	0	0	0	0	0	0	0	0	0	0	0	0	0	0	0	0	0	8.6	0	0	0	0	2.7	0	1.8	0	0	0	0	0	0	0	0	0	0
2001-06-29	0	0	0	0	0	0	0	0	0	0	0	0	0	0	0	0	0	0	0	0	0	0	0	0	0	0	0	0	0	0	0	0	0	0	0	0	0	0	0	0	0	0	0	0	0	0	0	0	0
2001-06-30	0	0	0	0	0	0	0	0	0	0	0	0	0	0	0	0	0	0	0	0	0	0	0	0	0	0	0	0	0	0	0	0	0	0	0	0	0	0	0	0	0	0	0	0	0	0	0	0	0
2001-07-01	0	0	0	0	0	0	0	0	0	0	0	0	0	0	0	0	0	0	0	0	0	0	0	0	0	0	2.3	0	0	0	0	0	0	0	0	0	0	0	0	0	0	0	0	0	0	0	0	0	0
2001-07-02	0	0	0	0	0	2.3	0	0	0	0	0	0	0	0	0	0	0	0	0	0	0	0	0	0	0	0	4.1	0	0	0	0	1	0	0	0	0	0	0	3.1	0	0	0	0	0	0	0	0	0	0
2001-07-03	0	0	0	0	0	0.4	0	0	0	0	0	0	0	0.2	0	0	0	0	0	0	0	0	0	0	0	0	1.6	2.7	0	0	0	1.8	0	0	0	0	0	0	0	0	0	0	0	0	0	0	0	0	0
2001-07-04	0	0	0	0	0.7	1.9	0	0	0	0	0	0	0	0	0	0	0	0	0	0	0	0	0	0	0	0	8.3	11.1	0	0	0	8.6	0	0	0	0	0	0	1.3	1.3	0	0	0	0	0	0	0	0	0
2001-07-05	0	0	0	0	0	0	0	0	0	0	0	0	0	0	0	0	0	0	0	0	0	0	0	0	0	0	2	0	0	0	0	0	0	0	0	0	0.2	0	0	0	0	0	0	0	0	0	0	0	0
2001-07-06	0	0	0	0	0	0	0	0	0	0	0	0	0	0.1	0	0	0	0	0	0	0	0	0	0	0	0	0	0	0	0	0	0	0	0	0	0.2	0	0	0	0	0	0	0	0	0	0	0	0	0
2001-07-07	0	0	0	0	0	0	0	0	0	0	0	0	0	0	0	0	0	0	0	0	0	0	0	0	0	0	1.3	0	0	0	0	0	0	0	0	1.1	0	0	0	0	0	0	0	0	0	0	0	0	0
2001-07-08	0	0	0	0	0	0	0	0	0	0	0	0	0	0	0	0	0	0	0	0	0	0	0	0	0	0	2.7	0	0	0	0	0	0	0	0	0	0	0	0	0	0	0	0	0	0	0	0	0	0
2001-07-09	0	0	0	0	0	3.4	0	0	0	0	0	0	0	0	0	0	0	0	0	0	0	0	0	0	0	0	4.4	0	0	0	0	1.5	0	0	0	0.7	0	0	0.9	0	0	0	0	0	0	0	0	0	0
2001-07-10	0	0	0	0	1	7.1	0	0	0	0	0.3	0	0	6.3	0	0	0	2.7	0	0	0	0	0	0	0	0	0	2.6	0.5	0.4	0.8	8	0	0	0	0	0.9	0	4	0	0.1	0	0	0	0	0	0	0	0
2001-07-11	0	0	0	0	0	4.5	0	0	0	0	0	0	1	1.4	0	1	0	0.1	0	0	3.1	0	0	0	1	0.9	1.5	7.3	0.3	0	0	0.2	0	0	0	0.6	0.3	0	2.7	0	0	0	0	0	0	0	0	0	0
2001-07-12	0	0	0	0	0.1	0.5	0	0	0.1	0	0	0	0	0	0	0	0	0	0	0	0.5	0	0	0	0	0	0.2	1.9	0	0	0	1	0.2	0	0	0.3	0.3	0	0.1	0	0	0	0	0	0	0	0	0	0
2001-07-13	0	0	0	0	0	6.7	0	0	0	0	0	0	0	0	0	0	0	0	0	0	0	0	0	0	0	0	1.7	0	0	0	0	0.4	0	0	0	0	0	0	0	0	0	0	0	0	0	0	0	0	0
2001-07-14	0	0	0	0	0	0.3	0	0	0	0	0	0	0	0.4	0	0	0	0	0	0	2.3	0	0	0	0	0.1	3.9	0.3	0	0	0	0	0	0	0	0	0	0	0	0	0	0	0	0	0	0	0	0	0
2001-07-15	0	0	0	0	0	0.6	0	0	0	0	0	0	0	0	0	0	0	0	0	0	0	0	0	0	0	0	0	0	0	0	0	0	0	0	0	0	0	0	0	0	0	0	0	0	0	0	0	0	0
2001-07-16	0	0	0	0	0	11.6	0	0	0	0	0	0	0	0.1	0	0	0	0	0	0	0	0	0	0	0	0	2.6	0	0	0	0	0	0	0	0	0.4	0	0	1	0	0	0	0	0	0	0	0	0	0
2001-07-17	0	0	0	0	0	2.3	0	0	0	0	0	0	0	1	0	0	0	0	0	0	0	0	0	0	0	0	3.6	4.4	0	0	0	3.2	0	0	0	0	0	0	1.5	0	0	0	0	0	0	0	0	0	0
2001-07-18	0	0	0	0	0	0.7	0	0	0	0	0	0	0	1.3	0	0	0	0	0	0	0	0	0	0	0	0	0	0	0	0	0	0	0	0	0	0	0	0	2.9	0	0	0	0	0	0	0	0	0	0
2001-07-19	0	0	0	0	0	6.2	0	0	0	0	0	0	0	0	0	0	0	0	0	0	0	0	0.4	0.4	0	0.7	2.5	0	0	0	0	0	0	0	0	0	0	0	0.4	0	0	0	0	0	0	0	0	0	0
2001-07-20	0	0	0	0	0	1.8	0	0	0	0	0	0	0	0	0	0	0	0	0	0	0	0	0.6	0.6	0	0	0	0	0	0	0	0	0	0	0	0	0	0	1.4	0	0	0	0	0	0	0	0	0	0
2001-07-21	0	0	0	0	0	0	0	0	0	0	0	0	0	0	0	0	0	0	0	0	0	0	0	0	0	0	0	0	0	0	0	0	0	0	0	0	0	0	0.6	0	0	0	0	0	0	0	0	0	0
2001-07-22	0	0	0	0	0	0	0	0	0	0	0	0	0	0	0	0	0	0	0	0	0	0	1.3	1.3	0	0	0	0	0	0	0	0	0	0	0	0	0	0	0	0	0	0.2	0	0	0	0	0	0	0
2001-07-23	0	0	0	0	0	2.9	0	0	0	0	0	0	0	0	0	0	0	0	0	0	0	0	0	0	0	0	6.2	11.7	0	0	0	0	0	0	0	0	0	0	1.9	0	0	0.6	0	0	0	0	0	0	0
2001-07-24	0	0	0	0	0	0	0	0	0	0	0	0	1.3	4.1	0	1.2	0	1.3	0	0	0	0	0	0	1.3	3.2	0.8	2	0	0	0	0	0	0	0	0	0	0	1.8	0	0	0.2	0	0	0	0	0	0	0
2001-07-25	0	0	0	0	0	3	0	0	0	0	0	0	0	0.3	0	0	0	0	0	0	0	0	0.1	0.1	0	0	4.5	0	0	0	0	0.1	0	0	0	0	0	0	2.2	0	0	0.1	0	0	0	0	0	0	0
2001-07-26	0	0	0	0	0	1.3	0	0	0	0	0	0	0	0.2	0	0	0	0	0	0	0	0	0	0	0	0.2	3.7	0	0	0	0	0	0	0	0	0	0	0	0	0	0	0	0	0	0	0	0	0	0
2001-07-27	0	0	0	0	0	0.2	0	0	0	0	0	0	0	0	0	0	0	0	0	0	0	0	0	0	0	0	4.7	1.6	0	0	0	0	0	0	0	0	0.4	0	0	0	0	0.1	0	0	0	0	0	0	0
2001-07-28	0	0.1	0	0	0	0	0	0	0	0	0	0	0	0	0	0	0	0	0	0	0	0	0	0	0	0	0	2.8	0	0	0	1	0	0	0	0	0	0	0	0	0	0.2	0	0	0	0	0	0	0
2001-07-29	0	0	0	0	0.2	0.1	0	0	0	0	0	0	0	0	0	0	0	0	0	0	0	0	0	0	0	0	0	0.7	0	0	0	0	0	0	0	0	0.3	0	1.1	0	0	0	0	0	0	0	0	0	0
2001-07-30	0	0	0	0	0	0.8	0	0.1	0	0	0	0	0	1.2	0	0	0	0	0	0	0	0	0	0	0	0	3.3	0	0	0	0	0	0	0	0	0	0	0	0	0	0	0	0	0	0	0	0	0	0
2001-07-31	0.5	0	0	0	0.2	0	0	0.6	0.1	0	0	0.2	0.1	8.1	0	0	0.2	0	0	0	2.8	0.5	1	1	0.1	0.1	0.4	0	0.1	0	0	1.4	0	0	0.1	0	0	0	0	0	0.1	0	0	0	0	0	0	0	0.5
2001-08-01	0	0	0	0	0	0.1	0	0.9	0	0	0.3	1.1	0	1.3	0	0	1.1	0	0	0.1	1	0.9	0.1	0.1	0	0	0.7	0.5	0	0	0	0.2	0	0	0	0	0.1	0	0	0	0	0	0	0	0	0	0	0.1	0.9
2001-08-02	0	0	0	0	0	1.7	0	0	0.2	0	0	0	0	1.6	0	0	0	0.2	0	0	0	0	0	0	0	0	0.6	0	0.5	0	0	0.1	0	0	0	0.2	1.6	0.2	0	0	0	0	0	0	0	0	0	0	0
2001-08-03	0	0	0	0	0	0	0	0	0	0	0	0	0	0	0	0	0	0	0	0	0	0	0	0	0	0	0	0	0	0	0	2	0	0	0	0	0	0	0	0	0	0	0	0	0	0	0	0	0
2001-08-04	0	0	0	0	0	3.6	0	0	0	0	0	0	0	0	0	0	0	0	0	0	0	0	0	0	0	0	0	1.6	0	0	0	2	0	0	0	1.1	0	0	0	0	0	0	0	0	0	0	0	0	0
2001-08-05	0	0	0	0	0	0	0	0	0	0	0	0	0	0	0	0	0	0	0	0	0	0	0	0	0	0.2	2.1	1.6	0	0	0	3.2	0	0	0	2.8	1.9	0	1.6	0.1	0	0	0	0	0	0	0	0	0
2001-08-06	0	0	0	0	0	1.6	0	0	0	0	0.3	0	0	2.8	0	0	0	0	0	0	0	0	0	0	0	0	2.9	4.5	0	0	0	0	0	0	0	0	0.6	0	0.3	0	0	0	0	0	0	0	0	0	0
2001-08-07	0	0	0	0	0	0.3	0	0	0	0	0	0	0	0	0	0	0	0	0	0	0	0	0	0	0	0	0.5	5.9	0.2	0	0	0	1.8	0	0	6.5	0	0	0	0	0	0	0	0	0	0	0	0	0
2001-08-08	0	0	0.1	0	0	0	0	0	0	0	0	0	0	0	0	0	0	0	0	0	0	0	0	0	0	0	0	0	0	0.1	0	0.2	0	0	0	1.4	0	0	2.5	0	0	0	0	0	0	0	0	0	0
2001-08-09	0	0	0	0	0.1	0	0	0	0	0	0	0	0	0	0	0	0	0	0	0	0	0	0	0	0	0	1	0	0	0	0	0	0	0	0	0	0	0	0.5	0	0	0	0	0	0	0	0	0	0
2001-08-10	0	0	0	0	0	0	0	0	0	0	0	0	0	4.8	0	0	0	0	0	0	0	0	0	0	0	0	0	1.6	0	0	0	0	0	0	0	0	0	0	0	0	0	0	0	0	0	0	0	0	0
2001-08-11	0	0	0	0	0	2.9	0	0	0	0	0	0	0	0.7	0	0	0	0	0	0	0	0	0	0	0	0	0	0	0	0	0	0	0	0	0	0	0	0	0	0	0	0	0	0	0	0	0	0	0
2001-08-12	0	0.3	0	0	0	0	0	0	0	0	0	0	0	0	0	0	0	0	0	0	0	0	0	0	0	0	1	0	0	0	0	1.8	0	0	0	0	0	0	0	0	0	0	0	0	0	0	0	0	0
2001-08-13	0	0	0	0	0	3.4	0	0	0	0	0	0	0	0	0	0	0	0	0	0	0	0	0	0	0	0	0.7	0	0	0	0	3.1	0	0	0	0	0	0	0	0	0	0	0	0	0	0	0	0	0
2001-08-14	0	0	0	0	0	4.7	0	0	0	0	0	0.1	1.2	8.6	0	0.1	0.1	0	0	0	0	0.1	2	2	1.2	4.4	0	0	0	0	0	0	0	0	0	0	0	0	0	0	0	0	0	0	0	0	0	0	0.1
2001-08-15	0	0	0	0	0	3	0	0	0	0	0	0	0	0.2	0	0	0	0	0	0	0	0	0	0	0	0	0.9	3.6	0	0	0	0	0	0	0	0	0	0	0.6	0	0	0	0	0	0.1	0	0	0	0
2001-08-16	0	0	0.1	0	0	0	0	0	0	0	0	0	0	0	0	0	0	0	0	0	0	0	0	0	0	0	4.9	3.6	0	0	0	0	0	0	0	0	0	0	0	0	0	0	0	0	0	0	0	0	0
2001-08-17	0	0	0	0	0	0	0	0	0	0	1.7	0	0	0.7	0	0	0	0	0	0	0	0	0	0	0	0	0	0.5	0	0	0	0	0	0	0	0	0	0	0	0.2	0	0	0	0	0	0	0	0	0
2001-08-18	0	0	0	0	0	0	0	0	0	0	0	0	0	1.8	0	0	0	0	0	0	0	0	0	0	0	0	0	0	0	0	0	0	0	0	0	0	0	0	0	0	0	0.2	0	0	0	0	0	0	0
2001-08-19	0	0	0	0	0	0.5	0	0	0	0	0	0	0	3.1	0	0	0	0	0	0	0	0	0.4	0.4	0	0.1	1.5	1	0	0	0	0	0	0	0	0	0	0	0.5	0	0	0	0	0	0	0	0	0	0
2001-08-20	0	0	0	0	0	0.2	0	0	0	0	0	0	0	0	0	0	0	0	0	0	0	0	0	0	0	0	2.2	6.8	0	0	0	8.8	0	0	0	3.9	0	0	1	0	0	0.2	0	0	0	0	0	0	0
2001-08-21	0	0	0	0	0	3.1	0	0	0	0	0	0	0	0.1	0	0	0	0	0	0	0	0	0	0	0	0	0.3	3.6	0	0	0	4.1	5.1	0	0	2.5	0.3	0	0	0	0	0	0	0	0	0	0	0	0
2001-08-22	0	0	0	0	0	0	0	0	0	0	0	0	0	0	0	0	0	0	0	0	0	0	0	0	0	0	0.9	0	0	0	0	0	0	0	0	0	0	0	0.5	0	0	0	0	0	0	0	0	0	0
2001-08-23	0	0	0	0	0	1.1	0	0	0	0	0	0	0	0	0	0	0	0	0	0	0	0	0	0	0	0	1.3	0	0	0	0	0	0	0	0	2	0	0	0	0	0	0	0	0.4	0	0	0	0	0
2001-08-24	0	0	0	0	0	2.8	0	0	0	0	0	0	0	0	0	0	0	0	0	0	0	0	0	0	0	0	0.5	0	0	0	0	0.5	0	0	0	0	0	0	0.3	0	0	0	0	0	0	0	0	0	0
2001-08-25	0	0	0	0	0	0	0	0	0	0	0	0	0	0	0	0	0	0	0	0	0	0	0.3	0.3	0	0.1	2.4	0.4	0	0	0	0	0.2	0	0	0	0	0	0	0	0	0	0	0	0	0	0	0	0
2001-08-26	0	0	0	0	0	0	0	0	0	0	0	0	0	0.6	0	0	0	0	0	0	0	0	0	0	0	0	1.2	0	0	0	0	0	0	0	0.2	0	0.2	0	0.4	0	0	0	0	0	0	0	0	0	0
2001-08-27	0	0	0	0	0	2.1	0	0	0	0	0	0	0.1	7.4	0	0	0	0.3	0	0	0	0	0	0	0.1	0.1	1.5	3.3	0.1	0	0	1.3	0	0	0	1.1	0	0	1.5	0	0	0.1	0	0	0	0	0	0	0
2001-08-28	0	0	0	0	0	0	0	0	0	0	0.2	0	0	2.5	0	0	0	0	0	0	0	0	0.2	0.2	0	0.1	1.7	1.7	0	0	0	1.2	3.4	0	0	4.7	0.3	0	0	0.2	0	0	0	0	0	0	0	0	0
2001-08-29	0	0	0	0	0	1.3	0	0	0	0	0	0	0	0.7	0	0	0	0	0	0	0	0	0.2	0.2	0	0	2.8	3.6	0	0	0	0	0	0	0	0	0.2	0	1.6	0	0	0	0	0	0	0	0	0	0
2001-08-30	0	0	0	0	0	0	0	0	0	0	0	0	0	4	0	0	0	0	0	0	0	0	0	0	0	0	0.7	0	0	0	0	0	0	0	0	0	0	0	0	0	0	0	0	0	0	0	0	0	0
2001-08-31	0	0	0	0	0	0.4	0	0	0	0	0	0	0	0	0	0	0	0	0	0	0	0	0	0	0	0	0	2.6	0	0	0	0	0	0	0	0	0.4	0	2.8	0	0	0.1	0	0.4	0	0	0	0	0
2001-09-01	0	0	0	0	0	0	0	0	0	0	0	0	0	0	0	0	0	0	0	0	0	0	0	0	0	0	0	2.5	0	0	0	0	0	0	0	0	0.2	0	0	0	0	0	0.4	0.6	0	0	0	0	0
2001-09-02	0	0	0	0	0	0.5	0	0	0	0	0	0	0	0	0	0	0	0	0	0	0	0	0	0	0	0	0.9	0	0	0	0.1	0	0	0	0	0	0	0	0	0	0	0	0	0	0	0	0	0	0
2001-09-03	0	0	0	0	0	3.9	0	0	0	0	0	0	0	0.4	0	0	0	0	0	0	0	0	0	0	0	0	2.1	0	0	0	0	0	0	0	0	1.8	0	0	0	0	0	0	0	0	0	0	0	0	0
2001-09-04	0	0	0	0	0	10.1	0	0	0	0	0	0	0	0	0	0	0	0	0	0	0	0	0	0	0	0	0	0.4	0	0	0	0	0.8	0	0	6.7	0.3	0	1.2	0	0	0	0	0	0	0	0	0	0
2001-09-05	0	0.2	0	0	0	3.1	0	0	0	0	0.2	0	0.1	1.8	0	0	0	0	0	0	0	0	0	0	0.1	0.4	1.8	1.1	0	0	0.1	2.1	4.2	0	0	8	1.4	0	0	0	0	0	0	0	0	0	0	0	0
2001-09-06	0	0	0	0	0	0	0	0	0	0.1	0	0	0	0.6	0	0	0	0	0	0	0	0	0	0	0	0	1.7	0	0	0	0	1.6	1.4	0	0	0	0	0	1.9	0	0	0.2	0	0	0	0	0	0	0
2001-09-07	0	0	0	0	0	0.6	0	0	0	0	0	0	0	0	0	0	0	0	0	0	0	0	0	0	0	0	0	0	0	0	0	0.4	0	0	0.3	0	0	0	1.2	0	0	0	0	0	0	0	0	0	0
2001-09-08	0	0	0	0	0	0.1	0	0	0	0	0	0	0	0	0	0	0	0	0	0	0	0	0	0	0	0	0	0	0	0	0	0	0	0	0	0	0	0.2	3.2	0	0	0	0	0	0	0	0	0	0
2001-09-09	0	0	0	0	0	0	0	0	0	0	0.1	0	0	1.2	0	0	0	0	0	0	0	0	0	0	0	0	2	5.2	0.8	0	0	0.8	0	0	0	0	0	8	4.6	0	0	0.1	0	0	0	0	0	0	0
2001-09-10	0	0	0	0	0	0.8	0	0	0	0	0	0	0	0	0	0	0	0	0	0	0	0	0	0	0	0	1.7	0	0	0	0	0	0	0	0	0	0	0	0.6	0	0	0	0	0	0	0	0	0	0
2001-09-11	0	0	0	0	0	7.1	0	0	0	0	0	0	0	0	0	0	0	0	0	0	0	0	0	0	0	0	3.4	0	0	0	0	0	0	0	0	0	0	0	2.8	1.7	0	0	0	0	0	0	0	0	0
2001-09-12	0	0	0	0	0	1.1	0	0	0	0	0	0	0	0	0	0	0	0	0	0	0	0	0.2	0.2	0	0	0.6	0	0	0	0	0.8	0	0	0	0	0	0	0	0.6	0	0	0	0	0	0	0	0	0
2001-09-13	0	0	0	0	0	0	0	0	0	0	0	0	0	0	0	0	0	0	0	0	0	0	0.1	0.1	0	0	1.1	0	0	0	0	0.9	0	0	0	0	0	0	0	0.4	0	0	0.3	0.6	0	0	0	0	0
2001-09-14	0	0	0	0	0	0	0	0	0	0	0	0	0	0	0	0	0	0	0	0	0	0	0	0	0	0	1	0	0	0	0	0.2	0	0	0	0	0	0	0	16.7	0	0.1	0	0	1.1	0.1	0	0	0
2001-09-15	0	0	0	0	0	2	0	0.1	0	0	0	0	0	0.5	0	0	0	0	0	0	0	0	0	0	0	0	0	0	0	0	0	0.3	0	0	0	0	0	0	0	0	0	0.2	0	0.3	0	0	0	0	0
2001-09-16	0	0	0	0	0	0	0	0	0	0	0	0	0	0	0	0	0	0	0	0	0	0	0	0	0	0	0.3	0.7	0	0	0	1.2	0	0	0	0	0	0	0	0	0	0	0	0	0	0	0	0	0
2001-09-17	0	0	0	0	0	6.3	0	0	0	0	0	0	0	0	0	0	0	0	0	0	0	0	0	0	0	0	0.7	2.2	0	0	0	3.2	0	0	0	0.3	0	0	0	0	0	0	0	0	0	0	0	0	0
2001-09-18	0	0	0	0	0	1.6	0	0	0	0	0	0	0	0	0	0	0	0	0	0	0	0	0.1	0.1	0	0.1	2.5	0	0	0	0	1.5	0	0	0	1.2	0	0	0.5	0	0	0	0	0	0	0	0	0	0
2001-09-19	0	0	0	0	0	0	0	0	0	0	0	0	0	4.7	0	0	0	0	0	0	0	0	0	0	0	0	1.9	3.1	0	0	0	2.5	0	0	0	0	0	0	1	0	0	0	0	0	0	0	0	0	0
2001-09-20	0	0	0	0	0	0	0	0	0	0	0	0	0	0.4	0	0	0	0	0	0	0	0	0	0	0	0	0.8	0	0	0	0	1.3	0	0	0	0	0.6	0	1.5	0	0	0	8.1	0	0	0	0	0	0
2001-09-21	0	0	0	0	0	0	0	0	0	0	0	0	0	0	0	0	0	0	0	0	0	0	0	0	0	0	0	0	0	0	0	0	0	0	0	0	0	0	0	0	0	0	0	0.1	0	0	0	0	0
2001-09-22	0	0	0	0	0	0.5	0	0	0	0	0	0	0.2	0.8	0	0	0	0	0	0	0	0	0.2	0.2	0.2	0.5	0	2.3	0.2	0	0	1.6	0	0	0	0	0	0	0	0	0	0	0	0.1	0	0	0	0	0
2001-09-23	0	0	0	0	0	1.2	0	0	0	0	0	0	0	0	0	0	0	0	0	0	0	0	0	0	0	0	2.1	0	0	0	0	2.4	0	0	0	0	1.2	0	5	0	0	0	0	0	0	0	0	0	0
2001-09-24	0	0	0	0	0	2.6	0	0	0	0	0	0	0	0	0	0	0	0	0	0	0	0	0	0	0	0	2	0	0	0	0	0	0	0	0	3.4	0	0	3.5	0	0	0.2	0	0.5	0	0	0	0	0
2001-09-25	0	0	0	0	0	2.5	0	0	0	0	0	0	0	0	0	0	0	0	0	0	0	0	0	0	0	0	1.8	0	0	0	0	6.1	0	0	0	0.8	0	0	0	0	0	0	0	0	0	0	0	0	0
2001-09-26	0	0	0	0	0	0.7	0	0	0	0	0	0	0	0	0	0	0	0	0	0	0	0	0	0	0	0	0.3	3.4	0	0	0	2	0	0	0	4.4	0	0	0.1	0	0	0	0	0	0	0	0	0	0
2001-09-27	0	0	0	0	0	1.2	0	0	0	0	0	0	0	0	0	0	0	0	0	0	0	0	0.1	0.1	0	0	0	8.4	0	0	0	2.3	0	0	0	5.3	2	0	7.2	0	0	0	0	0	0	0	0	0	0
2001-09-28	0	0	0	0	0	0	0	0	0	0	0	0	0	3.4	0	0	0	0	0	0	0	0	0	0	0	0	2	0	0	0	0	0	0	0	0.4	34.6	0	0	3.4	0	0	0	0	0	0	0	0	0	0
2001-09-29	0	0	0	0	0	0	0	0	0	0	0	0	0	0	0	0	0	0	0	0	0	0	0	0	0	0	0	0	0	0	0	0	0	0	0	0	0	0	0	0	0	0	0	0	0	0	0	0	0
2001-09-30	0	0	0	0	0	0.2	0	0	0	0	0	0	0	0	0	0	0	0	0	0	0	0	0	0	0	0	0	0	0	0	0	0	0	0	0	0	0	0	1.9	0	0	0	0	0	0	0	0	0	0
2001-10-01	0	0	0	0	0	0.6	0	0	0	0	0	0	0	0	0	0	0	0	0	0	0	0	0	0	0	0	3.1	0	0	0	0	0	0	0	0	10.8	1.4	0	2.6	0	0	0	0	0	0	0	0	0	0
2001-10-02	0	0	0	0	0	0.1	0	0	0	0	0	0	0	0.1	0	0	0	0	0	0	0	0	0.2	0.2	0	0	3.4	0.2	0	0.4	0.2	0	0	0.1	0	0	0	0	2.6	0	0.2	0	0	0	0	0	0	0	0
2001-10-03	0	0	0	0	0	0	0	0	0	0	0	0	0	1.4	0	0	0	0	0	0	0	0	0	0	0	0.2	0.7	0	0	0	0.2	1.3	0	0	0	0	0	0	0	0	0	0.3	0	0	0	0	0	0	0
2001-10-04	0	0	0	0	0	0.2	0	0	0	0	0	0	0	0	0	0	0	0	0	0	0	0	0	0	0	0	0.6	0.8	0	0	0	0	0	0	0	0	0	0	0	0	0	0.4	0	0	0	0	0	0	0
2001-10-05	0	0	0	0	0	0	0	24.9	0.1	0	0	11	16.6	0	6.7	26.1	11	5.2	0.4	8.1	6.3	13.2	4.3	4.3	16.6	4.4	0.3	0	0	0	0	0	0	0	0	0	0	1.2	0	0	0	0.1	0	0	0	0	6.7	8.1	13.2
2001-10-06	0	0	0	0	0.7	0.5	1	2.8	2.6	0	0.1	11.3	4.8	0	2.1	15	11.3	5	0.9	0.7	6.7	17.8	51.7	51.7	4.8	7.2	9	0	0.8	0	0.5	0.1	0	0	0	0	0	0.1	0	0	0	0.2	0	0	0	0	2.1	0.7	17.8
2001-10-07	0	0	0	0	0	0	0	0	0	0	0	0	0	0	0	0	0	0	0	0	0	0	0	0	0	0	1.1	0	0	0	0	2.8	0	0	0	0	0	0	0.1	0	0	0.3	0	0	0	0	0	0	0
2001-10-08	0	0	0	0	0	0	0	0	0	0	0	0	0	0	0	0	0	0	0	0	0	0	0	0	0	0	0.4	0	0	0	0	2.2	0	0	0	0	0	0	0	0	0	0	0	0	0	0	0	0	0
2001-10-09	0	0	0	0	0	0.1	0	0	0	0	0	0	0.1	0	0	0.1	0	0	0.2	0	0	0	0	0	0.1	0	0.1	0	0	0	0	1.1	0	0	0	0	0	0	0	0	0	0	0	0	0	0	0	0	0
2001-10-10	0	0	0	0	0	0.1	0	0	0	0	0	0	0	0.4	0	0	0	0	0	0	0	0	0	0	0	0	0	0	0	0	0	0	0	0	0	0	0	0	0	0	0	0	0	0	0	0	0	0	0
2001-10-11	0	0	0	0	0	0.2	0	0	0	0	0	0	0	0	0	0	0	0	0	0	0	0	0	0	0	0	0.2	0	0	0	0	0	0	0	0.2	0	0	0	0	0	0	0	0	0	0	0	0	0	0
2001-10-12	0	0	0	0	0	0.3	0	0	0	0	0	0	0	0	0	0	0	0	0	0	0	0	0	0	0	0	0	0	0	0	0	0.7	0	0	0	0	0	0	0	0.1	0	0	0	0	0	0	0	0	0
2001-10-13	0	0	0	0	0	0	0	0	0	0	0	0	0	0	0	0	0	0	0	0	0	0	0	0	0	0	0	0.1	0	0	0	0	0	0	0	0	0	0	0.2	0.1	0	0	0	0	0	0	0	0	0
2001-10-14	0	0	0	0	0	0	0	0	0	0	0	0	0	0	0	0	0	0	0	0	0	0	0	0	0	0	0	0	0	0	0	0	0.1	0.2	0	0	0	0	0	0	0	0	0.1	0	0	0	0	0	0
2001-10-15	0	0	0	0	0	0	0	0	0	0	0	0	0	0.7	0	0	0	0	0	0	0	0	0	0	0	0	0.1	0.1	0	0	0	0.1	0	0	0	0	0	0	0	0	0	0	0.6	0	0	0	0	0	0
2001-10-16	0	0	0	0	0	0.1	0	0	0	0	0	0	0	0.1	0	0	0	0	0	0	0	0	0	0	0	0	0	0.1	0	0	0	0.1	0	0	0	0	0	0	0	0	0	0	0	0	0	0	0	0	0
2001-10-17	0	0	0	0	0	0	0	0	0	0	0	0	0	0.4	0	0	0	0	0	0	0	0	0	0	0	0	0	0	0	0	0	0.2	0	0	0	0	0	0	0	0	0	0	0.3	1.2	0	0	0	0	0
2001-10-18	0	0	0	0	0	0	0	0	0	0	0	0	0	0	0	0	0	0	0	0	0	0	0	0	0	0	0	0	0	0	0	0	0	0	0	0	0	0	2.3	62.7	0	0	0.1	0	0	0	0	0	0
2001-10-19	0	0	0	0	0	0	0	0	0	0	0	0	0	0	0	0	0	0	0	0	0	0	0	0	0	0	0.1	0	0	0	0	0	0	0.1	0	0	0	0	0.2	0	0	0	0	5.6	2.5	7.1	0	0	0
2001-10-20	0	0	0	0	0	0	0	0	0	0	0	0	0	0.4	0	0	0	0	0	0	0	0	0	0	0	0.1	0	0	0	0	0	0.2	0	0	0	0	0	0	0.4	0	0	0	0.2	0	0.4	4.7	0	0	0
2001-10-21	0	0	0	0	0	0	0	0	0	0	0	0	0	0	0	0	0	0	0	0	0	0	0	0	0	0	0.3	0	0	0	0	0.4	0	0	0	0	0	0	0	0	0	0	0	2.6	5.5	4.1	0	0	0
2001-10-22	0	0	0	0	0	0.4	0	0	0	0	0	0	0.1	0.7	0	0	0	0	0	0	0	0	0	0	0.1	0.3	0.1	0.2	0	0	0	0.1	0	0	0	0.4	0	0	2	0	0	0.2	0.2	0	0	0.2	0	0	0
2001-10-23	0	0	0	0	0	0	0	0	0	0	0	0	0	0	0	0	0	0	0	0	6	0.2	0.1	0.1	0	0	0	0	0	0	0	0	0.1	0	0	0.4	0.1	0	0.3	0	0	0.2	0.9	6.6	0	0	0	0	0.2
2001-10-24	0	0	0	0	0	0.1	6.7	0	2	0	0	0	0	0.3	8.9	3.4	0	9.3	18.6	0	16.2	1	0	0	0	0	0	0	0.4	1.2	0	0.1	0	0	0	0	0	0	0	0	3.1	0	0.2	16.3	0	0	8.9	0	1
2001-10-25	0	0	0	0	0	0	0.1	0	0	0	0.2	0.1	1.9	0.1	0	3.2	0.1	4.8	0	0	0.6	0.4	0.9	0.9	1.9	0.3	0	0	0.7	0.5	0	0	0	0	0	0	0	0	0	0.1	5.2	0	0.2	0	0	0	0	0	0.4
2001-10-26	0	0	0	0	0	0	0	0	0	0	0	0	0	0	0	0	0	0	0	0	0	0	0	0	0	0	0	0	0	0	0	0	0	0	0	0	0	0	0	0	0	0.1	6.4	14.9	0	0.2	0	0	0
2001-10-27	0	0	0	0	0	0	0	0	0	0	0	0	0	0	0	0	0	0	0	0	0	0	0	0	0	0	0	0.1	0	0	0	0	0.3	0	0	0	2.3	0	0	0	0	0.6	1.9	3.8	0.5	0.1	0	0	0
2001-10-28	0	0	0	0	0	0.6	0	0	0	0	0	0	0	0	0	0	0	0	0	0	0	0	0	0	0	0	0.1	0	0	0	0	0.1	0	0	0	0	0	0	0	0	0	0	10.9	1.8	3	0.7	0	0	0
2001-10-29	0	0	0	0	0	0.1	0	0	0	0	0	0	0	0	0	0	0	0	0	0	0	0	0	0	0	0	0.1	0	0	0.2	0	0	0	0	0	0	0	0	0.2	0	0.1	0	24.4	3.1	3.9	0.5	0	0	0
2001-10-30	0	0	0	0	0	0	0	0	0	0	0	0	0	0	0	0	0	0	0	0	0	0	0	0	0	0	0	0	0	0	0	0	0	0	0	0	0	0	0	0	0	4.6	0.3	2.4	0	0	0	0	0
2001-10-31	0	0	0	0	0	0	0	0	0	0	0	0	0	0	0	0	0	0	0	0	0	0	0	0	0	0	0	0.1	0	0	0	0	0	0.4	5	0	0	0	0	3.5	0.3	0.2	12.2	0.6	12.2	0	0	0	0
2001-11-01	0	6.2	0	0	0	0.1	0	0	0	0	0.2	0	0.2	0	0	1	0	2.7	0	0	0.5	0	0	0	0.2	0	0	0.2	2	1.9	0.4	1.4	0	13.6	0.7	0	0	1.9	0.2	2.8	1.2	13.1	0	4.6	10.9	0	0	0	0
2001-11-02	0	4.3	0	0.2	0	0	0	0	0	0	0	0	0	0	0	0	0	0	0	0	0.1	0	0	0	0	0	0	0	0.1	1.3	1.9	0	0.1	1.2	0.5	0	0.6	0.4	0	0.3	2.4	0	4.7	4.8	0	0	0	0	0
2001-11-03	0	0	0	0	0	0	0	0	0	0	8.8	0	0.2	0	0	0	0	0.5	0	0	3.8	0	0.2	0.2	0.2	0.1	0	0	0	0	0	0	0	0	0	0.3	0.2	7.8	0	0	0.8	0	3.4	0	0	0	0	0	0
2001-11-04	0	0	0	0	0	0	0	0	0	0	1	0	0	0	0	0	0	0	0	0	0.3	0	0	0	0	0	0	0	0	0	0	0	0	0	0	0	0	0	0	0	0	0	3.1	3.3	2.5	0	0	0	0
2001-11-05	0	0	0	0	0	0.1	0.4	0	0	0	0	0	0.1	0.2	0	0	0	0	0	0	0.4	0	0.1	0.1	0.1	0.1	0.4	0.2	0	0	0	0.1	0	0	0	0	0	0	0.2	0	0	0	0.2	11.9	0	2.8	0	0	0
2001-11-06	0	0	0	0	0	0	0	0	0	0	0	0	0	0.5	0	0.1	0	0	0	0	0	0	0.1	0.1	0	0	0.3	0.1	0	0	0	0.4	0	0	0	0.1	0	0	0	0	0	4.6	3.3	1.6	21.2	3.1	0	0	0
2001-11-07	0	0	0	0	0	0	0	0	0	0	0	0.1	0	0.4	0	0	0.1	0	0	0	0.2	0.2	0.1	0.1	0	0	0.1	0.2	0	0	0	0	0	0	0	0	0	0	0	0	0	0	2.7	4.1	3.4	0	0	0	0.2
2001-11-08	0	0	0	0.3	0	0	0	0	0	0	0	0	0	0.4	0	0	0	0	0	0	0	0	0	0	0	0	0	0.2	0	0	0	0	0	0	0	0	0.2	0	0.3	0	0	0.2	0.2	0.3	9.7	0.1	0	0	0
2001-11-09	0	6.2	0	0.2	0	0	20.8	0	0	0	0	0	0	0.4	0	0	0	0	0	0	0	0	0	0	0	0	0.1	0	0	0	0	0.1	0	0	0	0	0	0	0.3	0	0	0	2.3	0	0.4	1.9	0	0	0
2001-11-10	0	0.2	0	0	0	0	0	0	0	0	0	0	0	0	0	0	0	0	0	0	0	0	0	0	0	0	0	0	0	0	0	0	0	0	0	0	0	0	0	0	0	0.9	0	9.9	0	0.1	0	0	0
2001-11-11	0	0	0	0	0	0.3	0	0	0	0	0	0	0	0	0	0.1	0	0.9	0	0	0	0	0	0	0	0	0	0	0	0	0	0	0	0	0	0	0	0	0	0	0	11.5	2.1	14.6	0.9	0	0	0	0
2001-11-12	0.1	0	0	0	0	0.1	0	0	0	0	0	0	0	0	0	0	0	0	0.3	0	0.1	0	0	0	0	0	0.9	0.6	0	0	0	0	0	0	0	0.1	0	0	0.1	0	0	1	6.3	0.8	38.8	1	0	0	0
2001-11-13	4.8	5.3	0.2	0.1	4.6	0	2.3	0.4	4	0	0	1	2.1	0.1	4.1	2.1	1	1.2	31.4	2.7	17.4	2.5	0.9	0.9	2.1	0.3	0.2	0	1	0.3	0.4	0.3	0	0	0	0	0	0	0	0	0	0.1	0	0.6	8	4.3	4.1	2.7	2.5
2001-11-14	43.9	34	14.5	9.1	5.3	0.1	0.2	3.8	10.3	0	0	3.8	5.4	10.6	3.7	0.2	3.8	0.1	11	6	17.7	4.6	7.5	7.5	5.4	5.9	2	0	3.6	4.4	7.6	0.1	0	1.9	0	0	0	0	0	0	1.3	0.6	0	70.3	19.4	1.4	3.7	6	4.6
2001-11-15	0.2	0.7	2.3	2.7	8.4	0.4	2.7	0	14.2	40	0	0.6	0.4	0.2	6.5	0.7	0.6	0.7	1.8	7.7	2.6	3.5	0.4	0.4	0.4	0.3	0.2	0	0.5	0	0	0.3	0	0	0	0.7	0	0	0	0	0.2	0.2	1.4	0	2.8	4.8	6.5	7.7	3.5
2001-11-16	0	12.8	0.8	0.1	7.4	0.7	0	0.4	1.4	45.7	1.4	0	1.6	1.5	1.1	3.5	0	3	3.5	0.9	0.3	1.7	1.4	1.4	1.6	1.7	0.1	0	0.4	1	0	0.2	0	0	0	0	0	0	0	0	0	0	4.2	11.6	4.6	0.2	1.1	0.9	1.7
2001-11-17	11	1.8	0	7.6	14.1	1.2	3.2	10.4	2	7.6	4.8	16.4	24.5	12.9	20.1	19.9	16.4	4.7	34.9	43.3	15.2	18	8.3	8.3	24.5	21.2	5.7	0	1.1	8.6	1.6	0	0	3	0.3	0	0	0	0	0	6.6	0	0	5.7	14	1.9	20.1	43.3	18
2001-11-18	1.1	24.6	0	1.1	3.1	1.4	13.1	40.5	0.4	18.9	5.8	34.3	31.6	11.8	29.3	21.3	34.3	16.1	20.6	41.1	19.7	19	27.4	27.4	31.6	26.8	1.1	0.1	6.2	22.9	12.5	0.4	0	0	0.1	0.1	0.2	0	0	0	29.4	0	0.9	0.1	3.1	0	29.3	41.1	19
2001-11-19	0.4	2.3	0	0	4.5	0	3.5	0.8	1.2	5	1.8	2.4	5.1	1.9	1.7	2.2	2.4	2.3	1.1	2.4	1	4.7	1.8	1.8	5.1	2.6	0	0.5	2.7	5.1	5.8	0.4	0	0.1	0	6.3	7.1	0	0	0	0.3	0.2	13.2	22.3	13.1	17.1	1.7	2.4	4.7
2001-11-20	19.7	14.9	34.4	5.6	0	0.3	0	0	0	0	0	0	0	0	0	0	0	0	0	0	0.1	0	0	0	0	0.1	0.1	0.2	0	0	0	0.3	0	0	0	0.5	0.3	0	0.2	0	0	0	3.1	0	5.9	4.4	0	0	0
2001-11-21	0.2	0	0	3.2	0	0.2	0	0	0	1.5	0	0	0	0.2	0	0	0	0	0	0	0.3	0	0	0	0	0	0.1	0.5	0	0	0	0.1	0	0	0	0	0	0	0	0.1	0	0	11.5	0	0	1	0	0	0
2001-11-22	1.5	8.2	3	13.3	2.4	0.1	0.8	0.5	0.2	3.7	0	0.8	0.2	0.1	1.7	0.2	0.8	0	2.9	2.1	1.1	1.5	0.9	0.9	0.2	0.4	0.6	0.3	0	0	0	0.1	0.2	0	0	0.1	0	0	0.2	0	0	1.2	4.5	0	3.8	0	1.7	2.1	1.5
2001-11-23	3.7	1.1	1.3	0.2	0	0.1	0.3	0	0	0	1	0	0.8	0.2	0	0.1	0	0.4	0	0	0.2	0.3	0.9	0.9	0.8	1	0.4	2.2	0.7	0.1	0	3.1	3.4	0	0	0	0	0	0.3	0	0.7	0.3	6.4	2.6	4.6	5.4	0	0	0.3
2001-11-24	0.1	0	0	0.1	0	0.1	4.2	0	0	0	0	0	0	0	0	0	0	0	0	0	0	0	0	0	0	0	0	0	0	0	0	0	0.8	0	0.1	0	0.2	0	0	0	3.7	0	2.3	0.3	1.5	0.8	0	0	0
2001-11-25	0.6	0.1	0.4	0	0	0.6	0	0	0	0.2	0	0.1	0	0.1	0	0	0.1	0.1	0	0	0.4	0.1	0	0	0	0	0	0	0.1	0	0	0	0	0	0	0	0	0.1	0	0	0	0	1.7	1.2	0.6	0.2	0	0	0.1
2001-11-26	0	0	0.4	0	0	0.8	0.2	0	0	3.4	0	0	0	0	0	0	0	0	0	0	0	0	0	0	0	0	0.3	0.4	0	0	0	0	0	0	0	0	0	0	0.1	0	0	0	19	0.1	15.5	3.9	0	0	0
2001-11-27	0	0	0	0	0	0.2	0	0	0	0	0	0	0	0.1	0	0	0	0	0	0	0	0	0	0	0	0	0.1	0.5	0	0	0	0	0	0	0	0	0.2	0	0.2	0	0	0.9	1.6	16.6	7.4	16.3	0	0	0
2001-11-28	0	0	0	0	0	0	0	0	0	0	0	0	0	0	0	0	0	0	0	0	0	0	0	0	0	0	0.2	0.1	0	0	0	0	0	0	0	0	0	0	0	0	0	0.6	1.8	1.9	5.1	5.4	0	0	0
2001-11-29	0	0	0	0	0	0	0	0	0	0	0.6	0	0	0.1	0	0	0	0	0	0	0	0	0	0	0	0	0	0	0	0	0	0.1	0	0	0	0	0	0	0.1	0	0	7.4	13.1	0.7	0.4	1.3	0	0	0
2001-11-30	0	0	0	0	0	2.9	0	0	0	0	0	0	0	0	0	0	0	0	0	0	0	0	0	0	0	0	0.2	0.2	0	0	0	0.1	0	0	0	0	0	0	0	0	0	0.9	0	0.1	4.7	0	0	0	0
2001-12-01	4.5	9.8	0	0.8	8.2	0.1	0.3	0	12.3	12.7	0	0	0	0	2.5	0	0	0	6.8	0.2	0.1	0.3	0.1	0.1	0	0.1	0	0.1	0	0	0	0	0	0	0	0	0	0	0	0	0	13	6.4	1.2	3.1	3.4	2.5	0.2	0.3
2001-12-02	5.6	10.6	0	0.1	0.1	0.1	0.1	0.1	1.1	0.1	0	0.1	0	0	1.2	0	0.1	0	1.9	0.4	1	0.8	0.2	0.2	0	0	0	0	0	0.3	0	0	0	0	0	0	0	0	0	0	0.1	0.7	1.3	0.7	0.7	5.9	1.2	0.4	0.8
2001-12-03	46.5	23.4	18	91.5	0.8	0.4	15.2	0.4	1.3	0.9	0	0.4	0	0	3.7	0	0.4	0	1.2	1.3	0.7	0	0	0	0	0	0.3	0.3	0	6.5	5	2.4	0.8	0.9	3.4	0	0.2	0.2	0	0	4.7	0	10.7	3	0.5	3.5	3.7	1.3	0
2001-12-04	22.3	3.8	27	22.8	60.3	1.8	16.6	35.7	12.4	0.5	17.9	28.7	14.7	1.3	33.2	19.9	28.7	5.9	65.9	26.9	17.4	18	14.6	14.6	14.7	6.6	10.8	8.7	10.2	2.7	3.2	12.1	0.7	5.3	0.4	0.2	1.5	2.9	0.7	0	1	0.1	0.6	5.6	0	0	33.2	26.9	18
2001-12-05	0	0	0	0	0.6	2.9	8.6	0.1	1.3	0.7	20.7	0.2	1.1	2.3	0.4	1.3	0.2	8.3	0	0.7	1.9	0.5	2.4	2.4	1.1	1.2	0.4	0.7	2.7	0.3	0.2	0	18.2	3.8	4.3	0.9	5.5	10.1	24	2.1	1.5	0	2	1.6	6.3	7.4	0.4	0.7	0.5
2001-12-06	0.8	0.3	4.9	0	0	0.4	7.3	3.1	0	0.1	0.3	5.7	0	0	0	0	5.7	0.3	0	0.1	0	2.8	0.1	0.1	0	0	0	0.3	3.5	0	0	0.2	13.8	6	6.5	16.6	9.3	4	6.7	10.6	0.5	2.2	7.7	8.6	0	0	0	0.1	2.8
2001-12-07	2.8	0	11.6	0.8	0	0.3	2.1	0.1	0	0	0.1	0	0.2	0	0	0.1	0	0.1	0	0	0.2	0	0.3	0.3	0.2	0.2	0	0.7	0.1	0	0	0.3	0	0	0.8	1.7	3.2	1.6	0.3	0	0	8	4.2	4.2	6.3	8.7	0	0	0
2001-12-08	4.6	2	3	8.4	0	0.1	17	0	0	0	1.8	0	1.6	0.9	0	5.2	0	1.8	0	0	7	0.2	0	0	1.6	0.3	0	0	0	0	0	0.2	0	0	0	0	0	0	0	0	0	9.1	5.2	2.2	3.7	33.1	0	0	0.2
2001-12-09	28.3	30.6	15.7	17.2	0	0.1	21.9	0	0	10.4	4.7	0	0	4.1	0	0.4	0	0.4	0	0	0.4	0.1	0.1	0.1	0	0	1	1.9	0.6	0.2	0.2	2.6	9.2	0	0.5	0.1	0	0	2.9	0	1.8	2.7	0	0.4	0	0.1	0	0	0.1
2001-12-10	0	0	0	0	0	0.1	7.8	6.1	0	1.4	0.8	2.1	2.1	0.8	1.3	3.9	2.1	5.5	0.1	2.4	1.6	2.4	1.3	1.3	2.1	1.8	1.9	4.7	3.7	7.9	5.4	8.6	4.4	5.5	1.8	0.4	0.4	0.4	8.8	0.7	5.7	0.3	0	4.7	0.1	5.3	1.3	2.4	2.4
2001-12-11	0.9	3	0.3	2.5	0	0.4	0.2	0	0	0.1	0	0.1	0.6	0	0	0.4	0.1	0.7	0	0	0	0.2	0.3	0.3	0.6	0.2	0	0	0	2.2	1.7	0	3.4	4.5	1.1	16.1	25.4	20.4	15	1.5	1.9	2.8	2.9	0.7	3.7	6.7	0	0	0.2
2001-12-12	1.3	1.4	0.6	1.1	0.8	0	2.9	4	2.4	1.5	0	2	2.6	0	1.8	1.5	2	2.9	1.3	2.9	2.7	0.4	0.1	0.1	2.6	3.3	0	0	0.1	0.7	1.3	0.8	0.2	1.8	4.9	0	0	0	0	0	0.5	13.5	1.3	9.8	1.4	2.5	1.8	2.9	0.4
2001-12-13	0	0.3	0	2.4	45	0.1	2.3	0.9	20.1	1.4	0	0.6	0	0	19.2	0	0.6	0	31.5	13.5	0.7	0.1	0	0	0	0	0.2	0	0	0	0	0.2	0.8	0.1	0	0	0	0	0	0	9.9	5.9	0.5	6.5	1.1	10.3	19.2	13.5	0.1
2001-12-14	0	2.8	0	0	5.3	0.1	11.2	9.4	27.4	11	2.6	11.8	43.3	10.1	16.5	29.5	11.8	11.6	7.5	16.1	40	16.1	20.6	20.6	43.3	23.8	0	0.3	0.1	9.4	0	0.4	0	0	0.1	0	0	0	0.1	0	7.4	11.1	0	2.2	1.4	0.7	16.5	16.1	16.1
2001-12-15	0.5	1	0.1	7.1	16.9	0.2	0.1	3.2	0.9	25.7	1	3.5	0.2	0	0	2.5	3.5	0.6	0	0.8	0	1.2	0	0	0.2	0	0.1	0	3.3	11.4	0.7	0	0	0	1.8	0	0	0	0	0	2.3	5.9	2.5	1.4	21.1	6.5	0	0.8	1.2
2001-12-16	0	4.4	0.3	0	44.5	0.2	0.1	0.4	3	51.9	3.6	0.7	8.2	17.4	3	1.6	0.7	3	2.7	2.8	18	2.6	8.1	8.1	8.2	21.1	2.1	0.1	0	2.1	3.8	0	0	2.8	3.7	0	0	0	0	0	0.2	3.8	0.7	4.1	5.3	5.5	3	2.8	2.6
2001-12-17	20.3	10.2	19.5	35.6	0.4	1	17	22.1	5	7.4	53.3	26.9	15	43.3	37.2	32.6	26.9	33.2	13.9	10.1	15.4	18.8	9.1	9.1	15	18.6	8.9	19.7	16.7	4.7	3.5	26.2	0.6	0.1	0	0	0	0.2	0.3	7.1	26	0	0.3	2.9	0	0.2	37.2	10.1	18.8
2001-12-18	0.6	0	0.1	1.1	0	0.6	3.6	5	0	0	8	5.1	5	3.7	5.2	12	5.1	12.4	3.3	1.4	10.3	6.5	5.7	5.7	5	2	15.8	4.6	6.7	2.8	4.8	3.9	2.8	1.2	0.5	2.4	1.6	0.6	1.2	0.7	4.1	0.4	8.2	7.5	0	0	5.2	1.4	6.5
2001-12-19	0	0	0	0	0	1.4	0	0	0	0	0	0	0.5	0	0.4	0.3	0	0.2	0	0	0	2.2	0.9	0.9	0.5	0	1	0.1	0	0	0	0.9	8	0.2	0	10.8	0.2	0.1	0.1	0.4	1.6	0	10.5	0.8	0	0	0.4	0	2.2
2001-12-20	0	0	0	0	1.2	0	11.1	12.1	0.4	0	3	7	9.2	9.1	3.5	30.6	7	34.1	0	4	4.5	9.7	10.4	10.4	9.2	8.8	0	0.1	0.2	17.7	9.1	0.1	0	0.9	6.5	29	3.4	0.3	34.5	4.9	35.1	0	27.3	11	0	0	3.5	4	9.7
2001-12-21	4.7	2.9	7.6	17.9	4.4	1.7	2.3	9.6	1.1	9.5	13.2	1.6	11.7	18.9	4.8	24.7	1.6	23.5	4.4	6.6	2.1	2.1	3.5	3.5	11.7	8.3	0.2	0.4	12.6	22.9	33.7	0	1.6	2.4	3	31.4	0.1	1.6	0.3	12.9	10.2	0	16.2	1.4	28.6	10.1	4.8	6.6	2.1
2001-12-22	0	0	7.9	0	0	0.4	0	0	0	2.8	0.4	0.4	8.1	4.3	0	0.4	0.4	1	0	0	0.1	1.9	2.6	2.6	8.1	10.5	14	0.7	3.4	1	3.6	9.4	32.7	10.5	9.4	34.8	0	0	20.2	9.2	1.5	4.1	5.6	0.9	0	1.3	0	0	1.9
2001-12-23	8.4	0.2	0.4	7.4	0	0.3	2.6	0.4	0.3	0.1	0.4	0.7	1.6	0.6	0.1	0.5	0.7	1	0.7	0	1.5	0.2	1.6	1.6	1.6	1.3	0.8	24.7	0	18.7	1.5	1.5	11.7	0.2	25.6	6.4	3.5	4	30.1	27.2	30.8	0.1	2.7	8.1	10.3	0.1	0.1	0	0.2
2001-12-24	2.1	11.6	3.8	10.4	3.9	1.5	0	37.9	3.2	40.9	3.9	5.5	0.3	15.6	0.2	2.1	5.5	13.2	1.1	0.9	0	0	0	0	0.3	0	1.3	2.3	0.8	3.4	0.1	12.7	8.5	4.1	1.2	2.9	0.4	0	5.4	0.2	7	0	0	3.7	4.4	0.3	0.2	0.9	0
2001-12-25	0.2	0	0.8	1.3	9.2	9.5	16	30	3.4	11.2	3.6	16.2	14.6	6.3	2.8	12.6	16.2	2.9	2.3	16.7	1.8	3	3.6	3.6	14.6	7.2	0.6	1.6	12.2	0	0.2	5.9	21.3	2.3	10.8	2.4	4.3	1.1	2.9	4.6	0.5	0	24.9	7.1	0	0	2.8	16.7	3
2001-12-26	3.8	7.6	15.5	21.2	7.2	0.4	6.2	20.4	16.3	14.9	2.2	10.3	10.5	0.4	13.9	6.2	10.3	2.8	18	33.8	8	8.6	1.9	1.9	10.5	1.6	9.3	35	12.9	6.2	3.2	16.9	28	9.2	2.4	15.5	8.7	0.3	15	1.6	0.7	0	10.4	0.4	0	0	13.9	33.8	8.6
2001-12-27	0	0.4	0	2.9	3.6	36.8	16.4	25.8	13.6	0	4.8	26	33.4	1.3	28.4	30.2	26	10.8	13.4	25.9	44.8	24.7	18.5	18.5	33.4	13.1	26	111.8	30.6	1.4	21.7	160.7	63.9	0	1.6	6.2	0	0	32.8	21	0.1	0	0	0	0	0	28.4	25.9	24.7
2001-12-28	1.2	2.2	0	0	35.3	101	0	6	10.2	10.3	19.2	9.6	15.7	28.7	6	10.5	9.6	30.8	1.7	8.2	32.5	24.8	20	20	15.7	24.1	23.3	26.7	6.5	5.6	15.3	36.9	23.9	0.1	0	7.3	0.3	0	0.3	3	0.4	0.1	0	19.6	0	0	6	8.2	24.8
2001-12-29	1.4	0.6	3	0	1.9	38.3	1.6	8	3.9	9.8	13.7	14.1	14.2	3.8	18.9	11.3	14.1	14	16.4	4.2	2.7	16.9	4.4	4.4	14.2	6.3	15.5	11.7	9.1	12.7	13.1	7.5	5.7	17.3	7.1	1.9	1.7	4.7	7.9	4.4	37.6	0	6.6	0	0	0	18.9	4.2	16.9
2001-12-30	2.2	20.5	0.4	1	0	16.6	1.2	4.1	0.2	7	0	3.7	7.2	5.9	18.7	5.1	3.7	3.1	13.5	7.2	0.3	6.9	4	4	7.2	9.2	6.9	34.7	6.3	0	19.9	22.9	0.3	29.8	1.9	0.3	0	0.4	0	0	0	0	6.7	5.5	0	0	18.7	7.2	6.9
2001-12-31	4	33	0.8	5.4	0	1.4	0	0	6.2	3.9	0	0	0	0	0.7	0	0	0.8	7.7	1	0.9	0	0	0	0	0	0.6	47.8	0	0	0	22	20.7	25.2	20.8	19.2	10.9	6.2	12.1	29.6	0.3	0.3	2.2	0.9	0	0	0.7	1	0
2002-01-01	0	0	0	0	0	0.6	0	0	0	0	0	0	0	0	0	0	0	0	0	0	0.1	0	0	0	0	0	1.5	2.3	0	40.2	17.4	7	7.2	10.2	3.5	0.3	0.2	1.6	1.2	3.8	0	0	3.5	1.8	0	0	0	0	0
2002-01-02	0	0	0	0	1.1	0.1	0	0.1	2.1	0	0	0	0	0	0	0	0	0	0	0	0	0	0	0	0	0	0.6	12	0.8	22.5	5.5	3.4	8.4	6.6	7.3	2.1	0.7	2.3	1	10.3	32.9	0	4.9	0	0	0	0	0	0
2002-01-03	0	0	0	0	0.4	0	0	0	0	0	0	0	0	0	0	0	0	0	0	0	0	0	0	0	0	0	0	1.6	0	1.2	3.6	0.8	24.1	0.4	2.1	2.7	2.7	4.5	41.9	15.5	3.6	0	5.8	0	0	0	0	0	0
2002-01-04	0	0	0	0	0.9	0.9	0	0	0.9	0	0	0	0	0	0	0	0	0	0	0.1	0	0	0	0	0	0	0.5	0.3	0	0	0	0	0.1	0	0.1	1	0.2	2.8	32.5	21.3	0	0	0.7	1.1	0	0	0	0.1	0
2002-01-05	0	0	0	0	0	0	0	0	0	0	0	0	0	0	0	0	0	0	0	0	0	0	0	0	0	0	0	1.3	0	0	0	0	10.9	1.1	0.3	0.6	0	4.1	24.3	2.5	0	0	2.9	19.6	0.3	0	0	0	0
2002-01-06	0	0	0	0	0	0	0	0	0	0	0	0	0	0	0	0	0	0	0	0	0	0	0	0	0	0	0.9	1.5	1.3	3.1	1.4	0.9	0	5.4	6.9	0	5.5	8.9	25.6	43.9	11.9	0	0	16	0	0	0	0	0
2002-01-07	0	0	0	0	0	0.1	0	0	39.8	0	0.8	2.4	6.7	0	0.5	21.4	2.4	10.8	6.3	0	0.1	1.7	0	0	6.7	0.7	3.3	11.9	3.2	9.4	13.6	8.9	0	6.5	4.2	0	3.8	5.7	1.8	0.6	36.6	0	4	0	0.1	0	0.5	0	1.7
2002-01-08	0	0	0	0	39.4	28.3	12.6	8.5	10	0	0	12	15.1	0	11.6	30.9	12	27.4	1.7	15.8	6.4	17.2	14.8	14.8	15.1	9.1	1.1	0.5	2.8	1.9	0	0.4	0	0	0	0	0.2	7.2	8.5	1.4	8.4	3.5	0.7	2.9	1.7	0.7	11.6	15.8	17.2
2002-01-09	1.3	20.3	0	0.6	0.1	1.5	11.8	0.3	2.1	0	1.4	1.4	0	0.4	0.3	0	1.4	0	0.1	0.4	0.8	4.2	6.3	6.3	0	0.8	5.5	7.2	8.3	0.5	1.7	36	6.2	0	3.6	2.4	1.6	0	0.1	0.1	0.1	18	21.8	7.1	0.4	0	0.3	0.4	4.2
2002-01-10	0	0	0	0	0	0	1.2	0	0	0	25.2	0	0.4	3.6	0	0	0	2.8	0	0	0	0	0	0	0.4	1.6	28.5	37.3	10	9	16.7	8.7	8.6	18.6	3.3	8.8	3	0.6	0.9	0.2	17	0.1	11.2	1.1	1.7	0.4	0	0	0
2002-01-11	0	0	0	0	0	0	0.6	0.4	0	0	4.5	1.5	9.1	6.5	1.6	5.6	1.5	3.7	14.8	0	18.5	10.6	20	20	9.1	11.9	23	4.6	1.1	2.9	2.7	0.6	0	1	0.4	0.6	0	0	1.4	0.1	4	0.8	6.3	6.6	1.4	0	1.6	0	10.6
2002-01-12	0	0	0	0	0	0.1	7.8	0.1	0.3	0	1.1	0	0.5	0	0	0.3	0	0.1	0	0.1	1.2	0	0.5	0.5	0.5	0.4	0	0.4	3.5	8.1	2.3	1.7	0	27.3	6.8	8.8	5.7	8	12.6	2.6	52.2	7.8	10.3	2.7	2.1	0.3	0	0.1	0
2002-01-13	11	9.1	28.7	0.1	2.9	2.5	1.5	10	66.5	29.9	0.3	15.3	3.3	2.2	2.8	11.8	15.3	2.1	9.7	1.4	15.8	12.6	0.8	0.8	3.3	5.8	2.5	0.7	0	0.3	0	0	2	0	9.3	33.1	15.4	12.1	13	19.6	1.3	11.8	2.3	0.7	11.9	1	2.8	1.4	12.6
2002-01-14	18.7	22	27.4	19.4	5.3	0	14.6	1.9	1.5	23.4	21.4	0.9	2.4	6.6	4.5	2.4	0.9	3	11.2	2.5	4.6	1.1	0.9	0.9	2.4	4	28.7	7.7	0.8	8.3	3.1	2.2	10.3	8.5	2.7	18	9	0.5	7.1	11.6	8.4	1.2	0	0	2	0.4	4.5	2.5	1.1
2002-01-15	35.9	14.8	4.1	11.4	22.1	0	28	19.3	0.4	0.9	11.2	18.9	1.7	1.4	6.1	1.8	18.9	0.4	0.3	1.6	11.8	15.2	13.1	13.1	1.7	4.8	5.5	30	8.1	0.3	1.7	40.9	5.1	1.6	4.2	27.4	7.7	1.3	0.1	0	4.3	0	0.2	0.2	0.1	0	6.1	1.6	15.2
2002-01-16	6	3.8	0.1	0	0	0	3.5	0	0	0	17.2	0	0.3	13.1	0	0.1	0	0.7	0	0	0	0	0	0	0.3	0.6	4.9	4.2	5.3	6.9	7.3	11.5	18.4	6.8	13.3	7.3	5.2	5	24.2	2.8	5.2	1.1	0.7	0.6	0	0	0	0	0
2002-01-17	0	0	0	0.1	0	0	8.4	0.4	0	0	4.1	1.2	3.7	0	0	3	1.2	3.3	0	0	0.1	0.6	5.5	5.5	3.7	4.2	1	0	2.5	15.8	8.2	0.5	5.9	3.1	0	0	2.3	5.9	55.6	4.1	26.6	0.8	0	1.6	0	0	0	0	0.6
2002-01-18	0	0	0	0	0	2.1	13.9	4.3	0	0	9.9	10.4	28.5	24.7	0	17.4	10.4	14.8	0	0	4.1	9	15.2	15.2	28.5	30.1	0	0	1.2	4.1	2.3	0.9	6.8	0	23.2	16.2	4.5	0	3.7	24.9	7	9.7	0.8	8.1	0.6	4.9	0	0	9
2002-01-19	9.4	8.4	7.5	21.8	0.5	0	67.1	8.6	0	0	40.2	8	17.1	12.3	0.6	22.6	8	21.7	0.6	0.7	7.3	7.9	9.6	9.6	17.1	15.4	11.8	20.3	31.5	22.6	19.9	58.5	15.2	27.2	17.2	23.7	27.5	18.2	5	0.3	29.4	12.2	0.5	2.5	24.2	6.9	0.6	0.7	7.9
2002-01-20	0.8	0	1.6	1.4	0.6	2.4	13.5	35.3	14.5	4.4	56.4	38.8	31.9	25.6	47.4	33.3	38.8	31.6	37	46.1	44.8	42.6	31	31	31.9	30.2	35.6	29.6	26.5	12.2	13.6	22.6	7.2	10.5	4.8	5.6	3.3	1.5	0.6	1.9	9.9	10.3	0.4	0.3	0	0.4	47.4	46.1	42.6
2002-01-21	42.7	6	51.1	25.8	4.4	0.9	21.2	16.8	1.7	5.5	6.4	9.3	10.4	1.6	26.8	17.9	9.3	17.2	8.9	28.4	6.5	7.5	2.3	2.3	10.4	6.8	0	0	0	0	0	0	0	0	0	1.2	0	0	1.4	0.1	0	13.4	0	0	0	0.3	26.8	28.4	7.5
2002-01-22	39.8	15.1	20.7	41.3	0.1	0	22.3	15.1	0	0	0.3	12.8	8.4	0.2	8.8	9.8	12.8	6.9	0.7	6	5.7	17.2	13.4	13.4	8.4	2.5	10.5	3.8	2.5	0.1	2.4	18	0.2	0	6.2	21.8	30.8	18	20.8	4.4	2	16.2	0	0	0	0.7	8.8	6	17.2
2002-01-23	1.2	0	8.8	0.9	0	0	0.5	2.9	0	3.2	18.8	2.4	4.8	12.5	0	7.5	2.4	30	0	0.1	0	1.6	0	0	4.8	1.7	32.5	49.3	45	18.9	48.7	55.3	34.4	2.3	0.4	7.3	3.8	0.3	7.3	3.7	4.3	16.4	0	0	0	1.3	0	0.1	1.6
2002-01-24	32.8	6.3	9.4	2.3	0	0.6	2.5	0	0	46.7	6.5	0	0.3	0	0	0	0	0.5	0	0	0	0	0	0	0.3	0.7	9	0	5.6	7.2	3.5	0.2	0.1	22.1	0.4	0	0	1	0	0.5	24.3	1.1	0	0	0.2	6.1	0	0	0
2002-01-25	18.9	5.1	3.1	0	0	0	0.1	0	1	0	0	0	0	0	0.7	0	0	0	0	2.8	0	0	0	0	0	0	0	0	0	1.2	0.2	0	0.5	0.5	8.3	1.4	4.4	5.5	1.4	0	0.4	4.3	6.6	0.3	0	0	0.7	2.8	0
2002-01-26	0.3	0.3	0	0	0	0	0	0	3.4	0	0	0.7	0	0	6.5	0	0.7	0	2	18.9	0	0.6	0	0	0	0	0	0.4	0	0	0	0.1	2.9	4	7.6	0.6	0.3	8.8	14.1	37.3	0	10.1	8.7	0	0.6	0.3	6.5	18.9	0.6
2002-01-27	0	1.8	0	0	4.9	0.6	0	0	2	0	0.1	0	0	0.2	0.3	0	0	0	0.6	0.3	0	0	0	0	0	0	5.5	2.6	1.7	18.1	24.8	18.3	5.3	10.4	2.3	1.3	2.1	3.5	4.9	1.6	8.4	9.4	11.1	10.4	0	1.2	0.3	0.3	0
2002-01-28	0	0	0	0	0	0.4	0	0	0.1	0	2.1	0	0	1	0	0	0	0	0	0	0	0	0	0	0	0	56	56.5	54.9	22.2	37.1	44	8.3	20.8	6.2	1.9	0.7	3.3	13	12.6	8.2	5.5	1.6	0.9	0.1	0	0	0	0
2002-01-29	0	0	0	0	0	0	0.2	0	0	0	13.8	0	0.1	1.6	0	0.1	0	0.1	0	0	0.1	0	1.4	1.4	0.1	0.2	1.9	1	11.3	23.2	22.7	10.6	0	1.8	1.6	10.7	7.6	4.4	17.3	48.6	3.9	7.6	0.1	2.2	0	2.2	0	0	0
2002-01-30	0	0	0	0	0.2	0	1.8	0	0.9	0	43.2	0	15.3	15.5	1.3	5.7	0	2.9	1.5	0	5.1	3.6	11.4	11.4	15.3	21.8	23.3	10.1	37.7	5	7.4	14.3	17.6	14.8	17.2	10	7.9	18.1	13.7	51.3	2.3	26.7	3	2.6	1.2	10.1	1.3	0	3.6
2002-01-31	0.7	0	0.1	0.2	46.7	0	8.4	8	2.8	0	21.1	9.9	9.7	8.5	0	4.9	9.9	15.6	9.8	0	58.1	31.4	1.5	1.5	9.7	33.2	21.2	13.4	26.2	1.7	9.3	43.3	58.8	30.1	3.5	18.2	0.6	1.1	0	0.3	2.8	35	0.1	21.3	17.7	1.8	0	0	31.4
2002-02-01	40.8	0.7	2	63	6	0.2	39.7	19.8	21.1	0.1	24	23.8	4.7	60.3	8	4.6	23.8	19.2	3	8.3	26.8	21.8	3.2	3.2	4.7	14.5	10.4	19	36.2	9.2	4.5	36.6	19.7	14.1	2.6	17.3	8.6	0.5	0	0	15.3	13.4	4.2	0.2	1.9	1.5	8	8.3	21.8
2002-02-02	11.8	1.5	0.9	0.1	23.4	26	8.7	18.6	29.4	3.6	29.5	40.2	26.3	10.3	11.8	14	40.2	20.5	10	4.9	39.8	48.2	30.9	30.9	26.3	18	48.7	58.8	63.5	30.8	30.6	61.1	14.3	15.5	24.3	8	5.5	0.7	0.4	6.8	41.1	5.4	0	2.4	1.1	0.5	11.8	4.9	48.2
2002-02-03	8.8	8.9	38.3	7.8	12	117.4	3.2	4.9	9.7	0	13	1.7	4.1	12.6	12	4.8	1.7	1.4	37.1	26.1	23.5	9.7	7.6	7.6	4.1	9.8	12.5	11.9	43.1	12.4	22.7	32.4	11.4	10.8	16.2	0	0.3	0.2	2.4	2.7	17	0	7.2	20.4	0	1.6	12	26.1	9.7
2002-02-04	0	2.5	11.7	0.4	0.2	36.8	4	9.3	1.9	0	45	18.2	23.3	6.3	6	2.2	18.2	17	11.2	0.4	15.7	19.4	33.4	33.4	23.3	30.8	6.5	4.4	33.6	0.8	4.9	5.9	5.8	0	10.3	3.1	3.6	11.1	34.1	87.3	1.1	0	20.8	8.6	0	0	6	0.4	19.4
2002-02-05	0	0	0	0	0	0.4	0	0	0	0	9.5	2.6	0	1.7	0	0	2.6	0.1	0	0	0	0.9	2.4	2.4	0	1.6	11.3	4.2	3.9	0.9	0	2.7	1.3	0	3.2	1.3	1.1	0.8	1.5	6.3	1	0	11.8	5.9	0	0	0	0	0.9
2002-02-06	0	0	0	0	0	0.6	0	0	0	1.5	0	0	0	0	0	0	0	0	0	0	0	0	0	0	0	0	4.2	6.4	0	0.2	5	3.1	2.4	1.1	0	1.6	0.1	0.1	1	2	0.3	0	0	17.2	0	0	0	0	0
2002-02-07	20.4	0.1	23.5	18.6	14.7	0	0	0	0	0	0	0	0.9	6	0	0	0	0	0	0	0	0	0	0	0.9	0	0.7	0	2.6	0	1.1	1.1	4.9	0	4.6	2.6	2.1	0.9	22.3	11.3	0	0	2	18.2	5.7	0	0	0	0
2002-02-08	17	21.4	8.2	27.5	21.4	0	6.3	0	0	0	10.3	0.1	1.1	8.4	0	0.2	0.1	0.2	1.1	0.4	0	0.2	0.2	0.2	1.1	2.5	0.9	17.8	17	28.6	18.5	15.3	10.2	0.1	5.2	0.7	2.3	4.1	1.9	2	6.5	0	5.3	3.5	4.8	1.4	0	0.4	0.2
2002-02-09	0	2.3	0	0	0	2.1	0	5	0	0	0	6.2	0	0	0	0	6.2	0	0	0	5	1.2	1.4	1.4	0	0	0.1	0	3	0.3	0	2.2	19	0.8	2.4	21.8	8.6	3.6	8.3	3	0.7	19.6	5.7	2	0	0.2	0	0	1.2
2002-02-10	0	0	0	0	0	0.5	0	0	0	0	0.1	0	0	0.2	0	0	0	0	0	0	0	0	0	0	0	0	1.7	0.8	0.8	2.1	3.1	1.4	0	1.2	0.8	1.3	1.3	1	7.6	9.3	11	1.4	4.8	2.6	0	0.1	0	0	0
2002-02-11	0	0	0	0	0	0	0	0	0	1.5	20.1	0	0	5.3	0	0	0	0.1	0	0	0	0	0.8	0.8	0	9.4	3.2	1.8	6.3	9.8	3.3	8.9	0.3	0.1	1.4	34.8	42.1	9.9	1.9	2	14.1	0	2	0	0	0	0	0	0
2002-02-12	3.3	0	0	0	0	0	0	0	0	0	0	0	0	0	0	0	0	0	0	0	0	0	0	0	0	0	0.1	0	0	0	0	0	0.3	0	0	0.3	3.1	8.8	36.1	55.1	0	2.1	0.1	1.1	0	0	0	0	0
2002-02-13	0	0	0	0	0	0.1	0	0	0	0	0	0	0	0	0	0	0	0	0	0	0	0	0	0	0	0	1.6	0.8	0.3	0.3	0.4	0.6	0	0	19.1	0.5	2.1	0	2	10.6	0	0	16.1	2	3.4	2.6	0	0	0
2002-02-14	0	0	0	0	0	0	0	0	0	0	0	0	0	0	0	0	0	0	0	0	0	0	0	0	0	0	0	0	0.7	0	0	0	1	0	4.9	1.5	3.1	13.7	1.7	16	0.1	34.7	0.3	27	17.8	22.2	0	0	0
2002-02-15	0	0	0	0	0	0	0	0	0	0	0.3	0	0	0	0	0	0	0.5	0	0	0	0	0	0	0	0	2.2	0	0	0	0.7	0	0	0	0.8	1.3	0	0.1	0.9	4.9	0	4.4	0.1	17.8	0	0.8	0	0	0
2002-02-16	0	0	8.8	0	0	0.3	0	0	0.1	26.9	5.7	0	0.1	39.5	0	0	0	0.1	4.8	0	0.1	0	0	0	0.1	1.3	1.9	1.3	1.1	0.7	0.9	5.2	18.7	2	6.1	20.2	20.2	20.6	6.5	0.4	0.1	7.3	4.2	3.6	0.4	0.2	0	0	0
2002-02-17	14.2	21.6	43.2	3.2	34.1	11.4	0	4.5	20.7	4.7	17.2	4.2	3.4	16.8	3	1.9	4.2	5.5	16	1.8	16.4	5.1	3.3	3.3	3.4	4	6.2	9.7	10.3	1.1	1.3	36.3	0.7	11.8	1.3	0.1	3.3	15.1	7.9	19.1	0.7	48.3	0.4	0.5	38.3	0.2	3	1.8	5.1
2002-02-18	26.4	1.7	35.4	0.3	0	11.9	2	10.3	1.4	0	17.5	13.3	9.7	17.5	10.5	6.8	13.3	6.2	11.4	5.1	35	19.7	22.2	22.2	9.7	14.4	52	21.7	26.8	38.7	31.3	22	21.7	11.5	9.1	32	1.4	4.6	29.4	63.9	24.9	17.8	0.1	19.7	16.5	0	10.5	5.1	19.7
2002-02-19	0	0.1	0	0	0.5	0.2	0.2	9.7	8.6	0	0.1	9.1	5.8	0.5	6.1	5	9.1	4.1	10.6	5.4	11.4	7.5	8.5	8.5	5.8	5.2	1.1	5.3	0.3	3.1	7.6	9.9	61.8	33.1	3.7	16.9	9.7	4	20.7	16.2	0.7	9.6	0	9.7	0	0	6.1	5.4	7.5
2002-02-20	0	0	0	0	0	0.5	0	0	0	0	0	0	0	0	0	0	0	0	0	0	0	0	0	0	0	0	0.1	0.2	0	0	0	0	1	0.3	0.9	0.8	0.1	0	3.2	0.2	0	0.9	0	0	0	0	0	0	0
2002-02-21	0	0	0	0	0	0	0	0	0	0	0	0	0	0	0	0	0	0	0	0	0	0	0	0	0	0	0	0	0	0	0	0.9	0	0	0.5	1.8	0.1	0.7	9.3	1.3	0	0	0	23.1	0	0	0	0	0
2002-02-22	0	0	0	0	0	0	0.1	0	0	0	0	0	0.1	0	0	0.1	0	0.7	0	0	0	0	0	0	0.1	0.2	0.1	0	0	0.6	0.3	0	0.4	0	0.3	0.5	1.8	0.3	0.4	0.7	0	0	0	2	0	0	0	0	0
2002-02-23	0	0	0	0	0	0	1.7	0	0	0	4.2	0	0.6	0.6	0	0.7	0	5	0	0	0	0	0	0	0.6	0	4.3	1.2	4.4	4.6	2.3	1.7	2.5	0.9	0	0.5	0.1	0.1	0	0	0.4	0.3	1.9	3.6	0	0	0	0	0
2002-02-24	0	0	0	0	0.1	2	0	0	0	0	1.6	0	2.2	0.5	0	0.4	0	0	0	0	0	0	0	0	2.2	1.1	0.6	0	0.1	0.3	3.9	1.3	1.4	5.2	0	4.4	1.2	0	0.5	0.2	10.1	0	0.2	0.1	0	0	0	0	0
2002-02-25	0	0	0	0	0	0	0	0	0	0	0	0	0	0	0	0	0	0	0	0	0	0	0	0	0	0	0	1.4	0	8.5	0	0	10.8	0.3	0	19.6	5.5	0	3.4	1.3	70.1	0	3.6	1	0	0	0	0	0
2002-02-26	0	0	0	0	0	4.1	0	0	0	0	0	0	0	0.3	0	0	0	0	0	0	0	0	0	0	0	0	0	1.4	0	0	0	8.3	29.5	0	0.4	0	0	0	12.8	4.5	0.9	0	25	6.9	0	0	0	0	0
2002-02-27	0	0	0	0	0	3	0	0	0	0	0	0	0	0	0	0	0	0	0	0	0.4	0	0	0	0	0	0	1.2	0	0	0	0	1.7	0	4.2	20.5	17.7	3.4	6.4	5.3	0	0	4.2	5.4	0	0	0	0	0
2002-02-28	0	0	0	0	30.7	0.6	0	0	5.9	0	0.1	0	12.6	0.3	0	2.3	0	1	0	0	2.8	0.3	3.6	3.6	12.6	1.7	0	0	0.3	0	0	0.3	30.6	0	12.3	16.9	14.2	2.9	30.3	11.1	0	0	0.9	0.1	0	0	0	0	0.3
2002-03-01	0	0	0	0	11.9	8.8	1.8	0	3	0	11.6	0.2	6.6	2.5	0	14.1	0.2	7.6	0	0	0.1	0.3	2.2	2.2	6.6	2.3	0	3.8	8.2	0.2	0.1	3.9	0	0.7	0	0.2	0	0	10.1	4.7	0.8	2.3	2.2	21.6	0	0	0	0	0.3
2002-03-02	0	0	0	0	0	0	0	0	0	0	0	0.2	0	0	0	0.2	0.2	0	1	0	1.4	0.6	0.3	0.3	0	0	0	0.3	0	2.2	0.2	0.3	0	0	0	0	0	0	3.9	0	8.3	0	0.2	1.2	0.3	0	0	0	0.6
2002-03-03	0	0.1	0	0	0.1	4.8	0	0	0	0	0	0	0	0	0	0	0	0	0.4	0	0	0	0	0	0	0.3	0.1	5.2	0	0	0	2.5	0	7.7	0	0.1	0	0	11.4	0	0	2.7	0	0	0	0	0	0	0
2002-03-04	0	0.1	0	0	0.2	1.7	4.4	0	0	0	0.2	0	0	0.6	0	0	0	0	0	0	0	0	0	0	0	0	0.1	2.3	1.7	1.2	0.4	1	3.6	11.9	0.5	1	0	0.6	9.9	6.6	6.7	0.2	0	0	0	0	0	0	0
2002-03-05	0	0	0	0	0.1	9.2	2.6	0	0	0	0	0	0.1	0	0	0	0	0.1	0	0	0	0	0.1	0.1	0.1	0	0	1.8	0.1	0.1	0.6	2.9	4	0.1	0	0.8	3.3	0.3	35.5	6	1.7	0	0.2	0.2	0	0	0	0	0
2002-03-06	1	0	0	0.3	0.1	0	0.7	0	0	0	0	0	0	0	0	0	0	0	0	0	0	0	0	0	0	0	2.5	0	0.5	5.5	11.1	0.2	0.8	1.4	0.9	7.2	6.6	9.9	19.6	0.7	8	0	0.2	1.9	0.4	0	0	0	0
2002-03-07	0	0	1.2	0	0	0.3	0	0	0	0	0	0	0	0.3	0	0	0	0	0	0	0	0	0	0	0	0	17.8	6.1	0	3.2	6.9	5.8	0	0.5	2	1.7	4.4	10.8	7.3	12	0.4	6.1	9.5	16.8	5.8	0.3	0	0	0
2002-03-08	0	2.8	0	0	0	0.5	0	0	0	0	0	0	0	0.2	0	0	0	0	0	0	0	0	0	0	0	0	1.1	0.3	0	1.7	5.1	10.6	6.9	0.5	0.9	18.8	12.5	7.6	9.2	1.1	0.2	2.8	3.5	12.4	1.3	2	0	0	0
2002-03-09	0	0	0	0	0	0.9	0	0	0	0	0	0	0	0	0	0	0	0	0	0	0	0	0	0	0	0	0	0	0	0	0	0.4	0.8	0	7.2	4.6	12.7	9.3	4.6	6.4	0	0.1	2.6	0.7	0	0	0	0	0
2002-03-10	0	0.4	0	0	4.1	0.9	0	0.1	0	0	0	0	0	0	0	0	0	0	0	0.1	0	0	0	0	0	0	0	0	0	0	0	1	1	0.1	0	3.5	2.9	0.1	0.3	0	0	18.1	0.6	4	0	0	0	0.1	0
2002-03-11	0	0	0	0	0	5.8	0	0	0	0	0	0	0	0	0	0	0	0	0	0	0	0	0	0	0	0	0.4	0.6	0	0	0	2.5	0	0	0	10.2	1.6	0	0	0.2	0	0	0	0.1	0	0	0	0	0
2002-03-12	0	0	0	0	0	0	0	0	0	0	0	0	0	0	0	0	0	0	0	0	0	0	0	0	0	0	0.2	0	0	0	0	1.7	0	0	0	0	0	0	0	3.1	0	6	0	0	0	0	0	0	0
2002-03-13	0	0	0	0	0	0.1	0	0	0	0	0	0	0	0	0	0	0	0	0	0	0	0	0	0	0	0	0	0	0	0	0	0.4	0	0	0	0	0	0	0	3.1	0	0.3	1.3	3.3	2	0.4	0	0	0
2002-03-14	0.1	3.1	2.7	0.3	2.9	0.6	0	0	0	6.9	0.4	0.3	1.6	4.8	0	0	0.3	0	0	0	0	0	0	0	1.6	17.1	0.1	0	2.2	26.5	1	0.2	0	1.2	0	0	0	0	0	0	0	46.9	30.8	10	0.8	2.2	0	0	0
2002-03-15	0.3	20.1	12.9	2.3	0.4	0.1	0	0.9	1.7	0.6	0.6	0.1	1.3	0.2	0.3	0.8	0.1	0.3	1.3	0.2	0	0.5	0.9	0.9	1.3	1.7	1.3	0.1	2.4	5.4	1.4	0	0	0.3	0	3.7	0.4	0.1	46.4	12.4	5.8	16.8	2.8	0	0	0	0.3	0.2	0.5
2002-03-16	2.7	0.1	3.7	0	3	1.1	0	0	0	1	0	0	0	0	0	0	0	0	0	0	0	0	0	0	0	0	0	0	0.9	0	0	4.8	9.3	0	0.2	16.5	2	0	22.7	19.5	0	0.4	0.1	3	0	0	0	0	0
2002-03-17	0	0	0	0	0	1	12.7	1.2	0	0	0	1.7	4.2	4.1	0	8.2	1.7	6.6	0	0	3.8	2.3	6.4	6.4	4.2	3.2	5.3	3.8	0	0.6	0	0	2.4	0.2	7.3	5.1	2	0	29.5	35.3	1.1	0	14.7	14.6	0	0	0	0	2.3
2002-03-18	6.3	0	0	8.8	2.7	1.4	52.6	8.1	7.9	1.8	0	5	2.5	0	0.7	5.1	5	3.6	2.5	0.7	20.6	22.7	17.1	17.1	2.5	16.3	44.7	86	38.6	5.9	21.2	81.6	48.2	3.7	11.2	1.6	0	1.3	12.5	13.5	51.8	0	0.3	0.7	0	0	0.7	0.7	22.7
2002-03-19	0	0	0.5	0	0	0	2.4	0.1	0	11.3	0.1	0.8	2.5	0	0.4	0	0.8	0	0	0.3	2	16.2	9.2	9.2	2.5	7.8	0.7	6	6.8	6.1	11.5	4.5	9.8	26.4	12.6	9.5	7.8	8	13.3	11.9	0.9	5.3	0	0.6	0	0	0.4	0.3	16.2
2002-03-20	0	2.2	1.4	0.7	5.1	2	32.3	3.1	7.7	14.6	0	0	0	0	8.7	0.9	0	1.3	48.4	0.6	8.2	15.8	1.6	1.6	0	0	0.4	0	2.7	6.6	11.4	2.9	0.1	1.5	2	0	0	2.3	0	0.1	0.3	12.1	25.8	5.2	0.4	4.3	8.7	0.6	15.8
2002-03-21	2.8	7.6	6.4	0	22.6	41.4	19.3	25.4	21.8	0	14.9	22.1	16.7	22.6	18.7	14.2	22.1	29.3	12.1	8	27.8	24.6	30.4	30.4	16.7	25.6	11.3	4.2	11.8	5.2	2.5	12	42.2	5.5	4.5	17.9	21.3	10.5	44.5	21.7	28.3	8.5	0.7	0.1	0	0	18.7	8	24.6
2002-03-22	4.8	0	5.6	0	0	7.5	1.8	0	0	0	4.9	0	5.3	16	0	2.4	0	7.6	0	0	11.1	0	0	0	5.3	0.1	9.1	4.7	4.7	2.1	1.4	8.8	19.4	3.3	19.8	13.2	21.4	39.1	18.3	45.2	4.1	0	0.3	0.7	0	3.9	0	0	0
2002-03-23	0	0	0	0	0	11.8	2.6	2	0	0	3.7	3.2	1.5	4	0	0.3	3.2	0.5	0.5	0	0	4.1	0.3	0.3	1.5	0.2	2.1	0.1	0	0.9	2.2	1	18.4	1.1	2.6	49.9	22.6	15.3	22.4	8.6	0	0.4	14.4	3.7	0	0	0	0	4.1
2002-03-24	0	0	0	0	3.6	31.5	0.2	0.4	0	0	3.3	1.5	0	0	0	0	1.5	2.6	0	0	0	0.7	0	0	0	0	0.2	9.2	0.8	1.4	3	1	53.6	14.6	9.7	49.1	35.1	38.7	13.3	4.6	0.7	0	17.4	4.4	0	0	0	0	0.7
2002-03-25	0	0	0	0	0.1	0	0	0	0	0	0	0	0	0	0	0	0	0	0	0	0	0	0	0	0	0	0	0.9	0	0	0.9	0.6	35.6	0	82.2	145.1	117.9	50.8	26	27.3	0	0	2.8	2	0	0	0	0	0
2002-03-26	0	0	0	0	0	0	0	0	0	0	0	0	0	0	0	0	0	0	0	0	0	0	0	0	0	0	0	0	0	0	0	0	0.8	0	22.2	17.9	9.3	11.6	33.6	2.9	0	0.2	0.7	1.7	0	0	0	0	0
2002-03-27	0	0	0	0	0	1.7	0	0	0	0	0	0	0	0	0	0	0	0	0	0	0	0	0	0	0	0	0	0	0	0	0	0	0.3	0	18.7	3.3	0	0	7	4.2	0	6.6	7.8	0.6	0	0.4	0	0	0
2002-03-28	0	0	0	0	0	1	0	0	0	0	0.4	0	0	0	0	0.1	0	0	0	0	0	0	0	0	0	0	0	0	0	0	0	0.6	56.9	0	0.1	3.5	7.3	3.3	0.6	3.1	5	0	4.1	2.6	0	0	0	0	0
2002-03-29	0	0	0	0	0	0.9	0	0	1.3	0	0	0	0	0.9	0	0	0	0	0	0	0	0	0	0	0	0	0	0	0	0	0	0.3	0	0	0	23.6	1.6	0	25.2	24.6	0	0	0.2	0	0	0	0	0	0
2002-03-30	0	0	0	0	0.2	0.4	0	0.4	0.2	0	0	0.2	0.1	0	0.6	0.1	0.2	0	0.1	0.4	1.7	0	0.1	0.1	0.1	0	0	0	0	0.1	0	0	0.9	0	12	15.5	15.8	6.4	23.9	56.2	0	0.2	0	2.5	0	0	0.6	0.4	0
2002-03-31	0	0	0	0	0	0	0	0	0	0	0	0	0	0	0	0	0	0	0	0	0	0	0	0	0	0	0	0	0	0	5.4	0	0	0	10.2	10.7	2.3	0	16.2	4.6	0	0	0	0	0	0.2	0	0	0
2002-04-01	0	0	0	0	0	0	0	0	0	0	0	0	0	0	0	0	0	0	0	0	0	0	0	0	0	0	0	1.3	0	0	0	0	0	0	0	7.8	0	0	2.7	0	0	0	2	0.2	0	0	0	0	0
2002-04-02	0	0	0	0	0	0.4	0	0	0	0	0	0	0	0.8	0	0	0	0	0	0	0	0	0	0	0	0	0	0	0	0	0	0.9	0	0	0	0	0.1	0	0.7	1.3	0	0	0	6.1	0	0	0	0	0
2002-04-03	0	0	0	0	0	1	0	0	0	0	0	0	0	0	0	0	0	0	0	0	0	0	0	0	0	0	0	0	0	0	0	2.7	0	0	0	0.6	1.2	2.5	3.1	7	0	0	0	0	0	0	0	0	0
2002-04-04	0	0	0	0	0	0.3	0	0	0	0	0	0	0	0.1	0	0	0	0	0	0	0	0	0	0	0	0	0	0.4	0	0	0	5.6	0	0	0	7.9	3.2	0.1	12.9	10.3	1.4	0	0	0	0	0	0	0	0
2002-04-05	0	0	0	0	0.5	0	0	0	0	0	0.8	0.4	0	0	0	0.9	0.4	7.1	0	0	0	3.6	0	0	0	0.1	2.7	1.1	0	0	0	9.1	17.1	0	0	0.7	1.9	0.1	3.8	5.2	0	0	0.2	0	0	0	0	0	3.6
2002-04-06	0	0	0	0	0	1.6	0	0	0	0	0	0	6.1	4.5	0	9.6	0	16.2	0	0	0.7	0	5.3	5.3	6.1	19.3	0	1	0	0	0	15	6.3	0	5.5	7.1	2.2	0.2	30	17.2	1.8	0	0	0	0	0	0	0	0
2002-04-07	0	0	0	0	0	2.7	3.4	0.9	10.8	0	0	6.6	13.1	1.6	0	18.2	6.6	8.9	4.2	0	39.8	13.1	31.8	31.8	13.1	14	26	13.3	0	0	0.1	42	28.4	0	0.1	26.9	11.7	0.7	21.2	5.5	0	0	0	0	0.4	0	0	0	13.1
2002-04-08	0	0	0	0	20	13.3	0	0	1	0	3.8	0	1.5	0.6	0	1.4	0	3.8	0	0	2.7	0	0	0	1.5	0	2.5	0.2	0	0	0	9.2	27.4	0.4	0	7.2	11.3	1.6	12.3	0.9	0	0	0	0	0.2	0	0	0	0
2002-04-09	0	0	0	1.1	0	0	0	0	0	0	0	0	0	0	0	0	0	0	0	0	0	0	0	0	0	0	0	0.5	0.9	0	0	0.2	1.5	0	1.3	4.6	1.5	0.9	0.6	0.7	0	0	2.5	0.1	0	0	0	0	0
2002-04-10	0.6	0	0	0.7	1.7	0	3.5	0	0	15.6	0	3.3	0	0	0	0	3.3	0	0	0	12.7	17.2	4.3	4.3	0	0	0	0	0.3	0	0	1.1	0.6	0	0	5.6	0.2	0.1	1.1	1.1	1.1	0	0	0	0	32.5	0	0	17.2
2002-04-11	0.3	0.7	0	0	3	0.4	0.7	0	0	2.6	0	0.1	0	0.5	0	0	0.1	0	0.4	0.4	0.9	0.7	0.1	0.1	0	0	0	0.3	0	0	0	0.3	0	0	0	0	0	0	0	0	0	2.3	9.3	0	5.5	0	0	0.4	0.7
2002-04-12	0.8	0.9	0	0	2	0.1	0.4	0	0	1.9	0	0	0	0	0	0	0	0	0	0	0	0	0	0	0	0	0.3	0.6	0	0	0	0.7	0	0	28.5	3.8	5.6	3.5	2.5	1.3	0	0.3	0	0	3.9	7.2	0	0	0
2002-04-13	0.9	3.8	0	0.1	0	0	4.3	0	0	4	0	0	0	0	0	0	0	0	0	0	0	0	0	0	0	0	0	0	0	0	0	0	0	0	0.1	17.8	2.4	0	0.7	2.4	0.8	0.4	2.1	2.8	5.8	6.6	0	0	0
2002-04-14	12.9	37.9	8.3	7.6	0.1	0.7	0	1.7	0	2.8	8.2	3.2	1.2	0.5	2.9	4.6	3.2	14.4	0	2.7	2.4	4.3	1.2	1.2	1.2	1.2	0	0	0.5	0.4	0	0	0	0	0	0	0	0	0	0	0.4	1	2.7	2.5	3.6	6.4	2.9	2.7	4.3
2002-04-15	34.3	51.4	8.2	9.5	0	5.6	0.9	0	40.8	1.8	0	0.4	0.9	0	0	4.5	0.4	22.5	0	0	17.1	12.4	27.6	27.6	0.9	1.2	0	0	0	0	0	0	0.1	0	0.4	0	0	0	0	0	0	3.3	0.7	0.1	15.6	19.3	0	0	12.4
2002-04-16	45.4	24.8	29	61.7	2.5	11.5	0	0.5	0	0	0	2.8	1.8	0.6	0	0	2.8	0	0	0.2	6.3	0	0	0	1.8	8.1	2.7	0	0	0	0	0	9.4	0	0	0.2	0	0.9	0.1	0	0.4	1.3	8.3	0.3	0.6	0.1	0	0.2	0
2002-04-17	2	2.1	0.1	0	0.2	5.1	0	0	0	0	0	0	0	0	0	0	0	0	0.3	0	0	0	0	0	0	0	0	0.1	0	0.1	1.6	2.2	0	0	0	19.8	0	0	5.2	1.9	0	0	0	0.3	0	0	0	0	0
2002-04-18	0	0	0	0	0	8.8	0	0	0	0	0	0	0	0	0	0	0	0	0	0	0	0	0	0	0	0	0.8	1.3	0	0	0	2.2	0	0	0	12.6	0	0	1.2	5.3	0	0	0	1.1	0	0	0	0	0
2002-04-19	0	0	0	0	0.3	3.3	0	0	0	0	0	0	0	0	0	0	0	0	0	0	0.4	0	0.3	0.3	0	0	0	0	0	0	0	0	0	0	0	5.2	0	0	0.4	2.2	0	0	0	0	0	0	0	0	0
2002-04-20	0	0	0	0	0	1.5	0	0	0	0	0	0	0	0.2	0	0	0	0	0	0	0	0	0	0	0	0	0.6	1.8	0	0	0	0	0	0	0	0	0	0	0	0	0	0	0	0	0	0	0	0	0
2002-04-21	0	0	0	0	0.2	0	0	0	0	0	0	0	0	0	0	0	0	0	0	0	0	0	0	0	0	0	0	0	0	0	0	0	0	0	0.8	0	0	0	1.1	29.3	0	0	0	0	0	0	0	0	0
2002-04-22	0	0	0	0	0	0	0	0	0	0	0	0	0	0	0	0	0	0	0	0	0	0	0	0	0	0	0	0	0	0	0	0	0	0	0	0	0	0	0.2	6.8	0	0	0	0	0	0	0	0	0
2002-04-23	0	0	0	0	0	0	0	0	0	0	0	0	0	0	0	0	0	0	0	0	0	0	0	0	0	0	0	0	0	0	0	0	0	0	0	0	0	0	0	0	0	0	0	0	0	0	0	0	0
2002-04-24	0	0	0	0	0	0	0	0	0	0	0	0	0	0	0	0	0	0	0	0	0	0	0	0	0	0	0	0	0	0	0	0.1	0	0	0	0	0	0	0	0	0	0	0	0	0	0	0	0	0
2002-04-25	0	0	0	0	0	0.2	0	0	0	0	0	0	0	0	0	0	0	0	0	0	0	0	0	0	0	0	0	0.4	0	0	0	3.5	0	0	0	1.6	0	0	0	0	0	0	0	0	0	0	0	0	0
2002-04-26	0	0	0	0	0	5.3	0	0	0	0	0	0	0	0	0	0	0	0	0	0	0	0	0	0	0	0	0.4	0	0	0	0	0	0	0	0	0	0	0	0	0	0	0	0	0	0	0	0	0	0
2002-04-27	0	0	0	0	0	0.7	0	0	0	0	0	0	0	0	0	0	0	0	0	0	0	0	0	0	0	0	0	6.4	0	0	0	0	0	0	0	0	0	0	0	0	0	0	0	0	0	0	0	0	0
2002-04-28	0	0	0	0	0	3.5	0	0	0	0	0	0	0	0	0	0	0	0	0	0	0	0	0	0	0	0	4.7	0	0	0	0	0	0	0	0	0	0	0	1.2	0	0	0	0	0	0	0	0	0	0
2002-04-29	0	0	0	0	0	0	0	0	0	0	0	0	0	0	0	0	0	0	0	0	0	0	0	0	0	0	0.9	0	0	0	0	0	0	0	0	0	0	0	2.2	0	0	0	0	0	0	0	0	0	0
2002-04-30	0	0	0	0	0	0	0	0	0	0	0	0	0	0	0	0	0	0	0	0	0	0	0	0	0	0	0	0	0	0	0	0	0	0	0	0	0	0	0	0	0	0	0	0	0	0	0	0	0
2002-05-01	0	0	0	0	0	2.3	0	0	0	0	0.2	0	0	1.8	0	0	0	0	0	0	0	0	0	0	0	0	0.3	0	0	0	0	0	0	0	0	0	0	0	0	0	0	0	0	0	0	0	0	0	0
2002-05-02	0	0	0	0	0	2.2	0	0	0	0	0	0	0	0	0	0	0	0	0	0	0	0	0	0	0	0	2.1	0	0	0	0	1.9	0	0	0	0	0	0	1.1	0	0	0	0	0	0	0	0	0	0
2002-05-03	0	0	0	0	0	1	0	0	0	0	0	0	0	0	0	0	0	0	0	0	0	0	1	1	0	0.4	0	0.8	0	0	0	8.6	0	0	0	0	0.9	0	0	0	0	0	0	0	0	0	0	0	0
2002-05-04	0	0	0	0	0	2.9	0	0	0	0	0	0	0	0	0	0	0	0	0	0	0.1	0	0	0	0	0	1.1	6.2	0	0	0	0	0	0	0	0	0	0	0	0	0	0	0	0	0	0	0	0	0
2002-05-05	0	0	0	0	0	0	0	0	0	0	0	0	0	0	0	0	0	0	0	0	0	0	0	0	0	0	1.8	0	0	0	0	0	0	0	0	0	0	0	0	0	0	0	0	0	0	0	0	0	0
2002-05-06	0	0	0	0	0	0	0	0	0	0	0	0	0	0	0	0	0	0	0	0	0	0	0	0	0	0	0.2	0	0	0	0	0	0	0	0	0	0	0	0	0	0	0	0	0	0	0	0	0	0
2002-05-07	0	0	0	0	0	0	0	0	0	0	0	0	0	0	0	0	0	0	0	0	0	0	0	0	0	0	0	0	0	0	0	0	0	0	0	0	0	0	0	0	0	0	0	0	0	0	0	0	0
2002-05-08	0	0	0	0	0	0	0	0	0.9	0	0	0	0	4.4	0	0	0	0	0	0	0	0	0	0	0	0	3	0	0	0	0	0	0	0	0	0.1	0	0	0	0	0	0	0	0	0	0	0	0	0
2002-05-09	0	0	0	0	0	2.7	0	0	0	0	0.9	0	0	3	0	0	0	0.1	0	0	0	0	0	0	0	0	0	7	0	0	0	0	0	0	0	0	0	0.2	5.3	0	0	0	0	0	0	0	0	0	0
2002-05-10	0	0	0	0	0	0	0	0	0	0	9.4	0	0	1	0	0	0	0	0	0	0	0	0	0	0	0	0.3	1.3	1.8	0	0	4.3	0	0	0	3.6	0	0	4	0	0	0	0	0	0	0	0	0	0
2002-05-11	0	0	0	0	0	0.6	0	0	0	0	0	0	0	0	0	0	0	0	0	0	0.2	0	0	0	0	0	0.4	0	0.2	0	0	0.5	2.1	0	0	1	0	0	0.9	0	0	0	0	0	0	0	0	0	0
2002-05-12	0	0	0	0	0	0	0	0	0	0	0	0	0	0	0	0	0	0	0	0	0	0	0	0	0	0	1.9	0	0	0	0	0	1.2	0	0	0	0	0	0	0	0	0	0	0	0	0	0	0	0
2002-05-13	0	0	0	0	0	0	0	0	0	0	0	0	0	0.2	0	0	0	0	0	0	0	0	0	0	0	0	3	0	0	0	0	0	0	0	0	0	0	0	0	0	0	0	0	0	0	0	0	0	0
2002-05-14	0	0	0	0	0	0	0	0	0	0	0	0	0	0	0	0	0	0	0	0	0	0	0	0	0	0	0	0	0	0	0	0	0	0	0	0	0	0	0	0	0	0	0	0	0	0	0	0	0
2002-05-15	0	0	0	0	0	0	0	0	0	0	0	0	0	0	0	0	0	0	0	0	0	0	0	0	0	0	2.9	0	0	0	0	0	0	0	0	0	0	0	0	0	0	0	0	0	0	0	0	0	0
2002-05-16	0	0	0	0	0	0	0	0	0	0	0	0	0.1	1.7	0	0	0	0	0	0	0	0	0.5	0.5	0.1	0	2.5	0	0	0	0	0	0	0	0	0	2.2	0	0	0	0	0	0	0	0	0	0	0	0
2002-05-17	0	0	0	0	0	0	0	0	0	0	0	0	0	3.4	0	0	0	0	0	0	0	0	0	0	0	0	0.1	7.4	0	0	0	8.4	0	0	0	0	0.4	0	1.1	0.3	0	0	0	0	0	0	0	0	0
2002-05-18	0	0	0	0	0	0.1	0	0	0	0	0	0	0	0	0	0	0	0	0	0	0	0	0	0	0	0	0	5.9	0	0	0	12.9	0	0	0	0	0	0	0	0	0	0	0	0	0	0	0	0	0
2002-05-19	0	0	0	0	0.5	0.2	0	0	0	0	0	0.4	0	0	0	0	0.4	0	0	0	0	0	0	0	0	0	2.5	6	0	0	0	4.6	0	0	0	0	0	0	0	0	0	0	0	0	0	0	0	0	0
2002-05-20	0	0	0	0	0	0.2	0	0	0	0	0	0	0	0	0	0	0	0	0	0	0	0	0.4	0.4	0	0	0	0	0	0	0	0	0	0	0	0	0	0	0	0	0	0	0	0	0	0	0	0	0
2002-05-21	0	0	0	0	0	0	0	0	0	0	0	0	0	0	0	0	0	0	0	0	0	0	0	0	0	0	0	0	0	0	0	0	0	0	0	0	0	0	0	0	0	0	0	0	0	0	0	0	0
2002-05-22	0	0	0	0	0	0	0	0	0	0	0	0	0	0	0	0	0	0	0	0	0	0	0	0	0	0	1.9	3.3	0	0	0	0	0	0	0	0	0	0	0	0	0	0	0	0	0	0	0	0	0
2002-05-23	0	0	0	0	0	0.8	0	0	0	0	0	0	0	7.6	0	0	0	1.4	0	0	0	0	0	0	0	0	0.4	1.5	0	0	0	0	0	0	0	0	0	0	0	0	0	0	0	0	0	0	0	0	0
2002-05-24	0	0	0	0	0.1	1.9	0	0	0	0	1	0	0.1	9.8	0	0	0	2.4	0	0	0	0	0	0	0.1	0.2	1.4	6.2	0	0.3	0.7	3.3	0	0	0	0	0	0	0	0	0.1	0	0	0	0	0	0	0	0
2002-05-25	0	0	0	0	0	8.7	0	0	0	0	0	0	0	7.9	0	0	0	0	0	0	0	0	0.8	0.8	0	0.1	0	1.7	0	0.1	0.2	0.7	0	0.1	0	0	0	0	0	0	0	0	0	0	0	0	0	0	0
2002-05-26	0	0	0	0	0	0	0	0	0	0	0	0	0	0	0	0	0	0	0	0	0	0	0	0	0	0	5.2	0.4	0.2	0	0	0	0	0	0	0	0	0	0	0	0	0	0	0	0	0	0	0	0
2002-05-27	0	0	0	0	0	0	0	0	0	0	0	0	0	0	0	0	0	0	0	0	0.4	0	0	0	0	0	0.4	0	0	0	0	0	2.1	0	0	0	0	0	0	0	0	0	0	0	0	0	0	0	0
2002-05-28	0	0	0	0	0	0	0	0	0	0	0	0	0	0	0	0	0	0	0	0	0	0	0	0	0	0	0	0	0.2	0	0	0	0	0	0	0	0	0	0	0	0	0	0	0	0	0	0	0	0
2002-05-29	0	0	0	0	0	0	0	0	0	0	0	0	0	0	0	0	0	0	0	0	0	0	0	0	0	0	1.3	0	0	0	0	0	0	0	0	0	0	0	0	0	0	0	0	0	0	0	0	0	0
2002-05-30	0	0	0	0	0	0	0	0	0	0	0	0	0	0	0	0	0	0	0	0	0	0	0	0	0	0	0	0	0	0	0	1.5	0	0	0	0	0	0	0	0	0	0	0	0	0	0	0	0	0
2002-05-31	0	0	0	0	0	0	0	0	0	0	0	0	0	1.2	0	0	0	0	0	0	0	0	0	0	0	0	0	0	0	0	0	8.5	0	0	0	0	0	0	0	0	0	0	0	0	0	0	0	0	0
2002-06-01	0	0.4	0	0	0	0.3	0	0	0	0	0	0	0.1	0.8	0	0.1	0	0	0	0	0	0	0	0	0.1	0.1	0.6	0	0	0	0	0	0	0	0	0	0	0	1.5	0	0	0	0	0	0	0	0	0	0
2002-06-02	0.4	1.5	0.2	0.6	0	0.4	0	0	0	2	1.3	0	0.7	3.1	0	0	0	0	0	0	0	0	0	0	0.7	0.9	0	0.6	1.7	2.9	1.1	0	0	2.4	0	0	0	0	0	0	0.2	0	0	0	0	0	0	0	0
2002-06-03	0	0	0	0	0	12.9	0	0	0	0	0	0	0	0	0	0	0	0	0	0	0	0	0	0	0	0	0	0	0	0	0	0	0	0	0	0	0	0	0	0	0	0	0	0	0	0	0	0	0
2002-06-04	0	0	0	0	0	0	0	0	0	0	0	0	0	0	0	0	0	0	0	0	0	0	0	0	0	0	0.9	0	0	0	0	0	0	0	0	0	0	0	0	0	0	0	0	0	0	0	0	0	0
2002-06-05	0	0	0	0	0	0	0	0	0	0	0	0	0	0	0	0	0	0	0	0	0	0	0	0	0	0	0	0	0	0	0	0	0	0	0	0	0	0	0	0	0	0	0	0	0	0	0	0	0
2002-06-06	0	0	0	0	0	6.7	0	0	0	0	0	0	0	2.3	0	0	0	0	0	0	0	0	0	0	0	0	1.6	0.8	0	0	0	0	0	0	0	0	0	0	3.3	0	0	0	0	0	0	0	0	0	0
2002-06-07	0	0	0	0	0	0	0	0	0	0	0	0	0	0	0	0	0	0	0	0	0	0	0	0	0	0	0.5	0	0	0	0	0	0	0	0	0	0	0	0	0	0	0	0	0	0	0	0	0	0
2002-06-08	0	0	0	0	0	0	0	0	0	0	0	0	0	0	0	0	0	0	0	0	0	0	0	0	0	0	2.8	6.2	0	0	0	0	0	0	0	0	0	0	1.8	0	0	0	0	0	0	0	0	0	0
2002-06-09	0	0	0	0	0	0	0	0	0	0	0	0	0	0	0	0	0	0	0	0	0	0	0	0	0	0	0	1.7	0	0	0	18.3	1.6	0	0	0	0	0	7	0.6	0	0	0	0	0	0	0	0	0
2002-06-10	0	0	0	0	0	0	0	0	0	0	0	0	0	0.3	0	0	0	0	0	0	0	0	0	0	0	0	0	1.1	0	0	0	0	0	0	0	0	0	0	0	0	0	0.1	0	0	0	0	0	0	0
2002-06-11	0	0	0	0	0	0.1	0	0	0	0	0.6	0	0	10.4	0	0	0	0	0	0	0	0	0	0	0	0	0	5.9	0.7	0	0	0	0	0	0	0	0	0	0	0	0	0	0	0	0	0	0	0	0
2002-06-12	0	0	0	0	0	0	0	0	0	0	1.7	0	0	27.8	0	0	0	0	0	0	0	0	0	0	0	0	0	17.3	1.9	0	0	0	0	0.1	0	3.5	0	0	2	0	0	0	0	0	0	0	0	0	0
2002-06-13	0	0	0	0	0	0	0	0	0	0	0	0	0.1	5.6	0	0.1	0	4.3	0	0	0	0	0	0	0.1	0	0	0	0	0	0	0	0	0	0	0	0	0	1.6	0.2	0	0	0	0	0	0	0	0	0
2002-06-14	0	0	0	0	0	0	0	0	0	0	0	0	0	0	0	0	0	0	0	0	0	0	0	0	0	0	0	0	0	0	0	0	0	0	0	0	0	0	0	0	0	0	0	0	0	0	0	0	0
2002-06-15	0	0	0	0	0	0	0	0	0	0	0	0	0.1	13.5	0	0	0	0	0	0	0	0	0	0	0.1	1	1	8.9	0.3	0	0.2	4.2	0	0	0.1	5.6	2.3	1.1	0	0	0	0.1	0	0	0	0	0	0	0
2002-06-16	0	0	0	0	0	22.2	0	0	0	0	1.3	0	0	7.8	0	0	0	0	0	0	0	0	0	0	0	0	4.6	13.2	2.5	0	0.9	19	3	0	0.2	0	0	0	6.3	1.7	0	0.2	0	0	0	0	0	0	0
2002-06-17	0	0	0	0	0	0	0	0	0	0	0	0	0	0	0	0	0	0	0	0	0	0	0	0	0	0	14.5	1.8	0.2	0	0	3.2	22.6	0	0	0	0	0	0	0	0	0	0	0	0	0	0	0	0
2002-06-18	0	0	0	0	0	0	0	0	0	0	0.8	0	0	8.4	0	0	0	0	0	0	0	0	0	0	0	0.4	0	0	0	0	0	0	0	0	0	0	0	0	0	0	0	0.1	0	0	0	0	0	0	0
2002-06-19	0	0	0	0	0	0.2	0	0	0	0	0.3	0	0	9.3	0	0	0	0	0	0	0	0	0	0	0	0.6	2.1	8.8	1	0.4	0.9	5	0	0	0.4	0	0.5	0.4	1.1	0	0	0	0	0	0	0	0	0	0
2002-06-20	0	0	0	0	1.5	2.4	0	0	0	0.2	0	0	0.2	3.2	0	0.1	0	3.9	0	0	0	0	0	0	0.2	0	0.2	0	0.6	0.4	1.3	3.5	0	0	0	0	0	0	0	0	0	0	0	0	0	0	0	0	0
2002-06-21	0	0	0	0	0	0.2	0	0.3	0	0	0	0	0	0	0	0	0	0	0	0	0.3	0	0	0	0	0	0	0.9	0	0	0	0.6	0	0	0	0	0	0	0	0	0	0	0	0	0	0	0	0	0
2002-06-22	0	0	0	0	0	1.9	0	0	0	0	0	0	0	0.3	0	0	0	0	0	0	0	0	0	0	0	0	2.9	1.9	0	0	0	1.3	0	0	0	0	0.9	0	2.1	0	0	0	0	0	0	0	0	0	0
2002-06-23	0	0.3	0	0	0	6.8	0	0	0	0	0	0	0	0	0	0	0	0	0	0	0	0	0	0	0	0	6.9	3.6	0.2	0	0	1.5	7.6	0	0	0	0	0.4	0	0	0	0	0	0	0	0	0	0	0
2002-06-24	0	0.1	0	0	0	0	0	0	0	0	0	0	0.8	5.6	0	0.2	0	0.7	0	0	0	0	0	0	0.8	0.2	2.4	0.7	0	0	0	1.1	0.3	0	0	0	0	0	0	0	0	0	0	0	0	0	0	0	0
2002-06-25	0	0	0	0	0	3.5	0	0	0	0	0	0	0	0	0	0	0	0	0	0	0	0	1.2	1.2	0	0.2	1.8	0	0	0	0	2.2	0.2	0	0	0	0	0	0	0	0	0	0	0	0	0	0	0	0
2002-06-26	0	0	0	0	0.7	4.1	0	0	0	0	0	0	0	0	0	0	0	0	0	0	0	0	0	0	0	0	2.1	0	0	0	0	0.6	0	0	0	0	0	0	1.7	0	0	0	0	0	0	0	0	0	0
2002-06-27	0	0	0	0	0	0	0	0	0	0	0	0	0	0	0	0	0	0	0	0	0	0	0	0	0	0	5.6	0	0	0	0	0	0	0	0	0	0	0	0	0	0	0	0	0	0	0	0	0	0
2002-06-28	0	0	0	0	0	0	0	0	0	0	0	0	0	0	0	0	0	0	0	0	0	0	0	0	0	0	7.4	0	0	0	0	0	0	0	0	0	0	0	0	0	0	0	0	0	0	0	0	0	0
2002-06-29	0	0	0	0	0	10.5	0	0	0	0	0	0	0	1.3	0	0	0	0	0	0	0	0	0	0	0	0	0	0	0	0	0	0	0	0	0	0	0	0	0	0	0	0	0	0	0	0	0	0	0
2002-06-30	0	0	0	0	0	2.6	0	0	0	0	0	0	0	5.6	0	0	0	0	0	0	0.1	0	0	0	0	0	2.2	2.4	0	0	0	1.7	0	0	0.1	0	0	0	0	0	0	0	0	0	0	0	0	0	0
2002-07-01	0	0	0	0	0	1.2	0	0	0	0	0	0	0	8	0	0	0	0	0	0	0	0	0	0	0	0.1	1.8	1.2	0	0	0	9.9	0	0	0	0	0	0	0	0	0	0.1	0	0	0	0	0	0	0
2002-07-02	0	0	0	0	0	4.5	0	0	0	0	0	0	0	0	0	0	0	0	0	0	0	0	0	0	0	0	2.6	0	0	0	0	0	0	0	0	0	0	0	0	0	0	0	0	0	0	0	0	0	0
2002-07-03	0	0	0	0	2.4	1.8	0	0	3.6	0	0	0	0	0	0	0	0	0	0.2	0	0	0.1	0.4	0.4	0	0.1	11.7	0.5	0	0	0	0	0	0	0	0	2.3	0	10	0	0	0	0	0	0	0	0	0	0.1
2002-07-04	0	0	0	0	0	0.5	0	0	0	0	0	0	0	0	0	0	0	0	0	0	0	0	0	0	0	0	0	0	0	0	0	0	0	0	0	0	0	0	0	0	0	0	0	0	0	0	0	0	0
2002-07-05	0	0	0	0	0	0	0	0	0	0	2	0	0	0.5	0	0	0	0	0	0	0	0	0	0	0	0.7	1.8	0	0	0	0	0.2	0	0	0	0	0	0	0	0	0	0	0	0	0	0	0	0	0
2002-07-06	0	0	0	0	0	0	0	0	0	0	0	0	0.1	1.3	0	0	0	0	0	0	0	0	0	0	0.1	0.2	0	0	0.1	0	0	0.9	0	0	0	0	0	0	0	0	0	0	0	0	0	0	0	0	0
2002-07-07	0	0	0	0	0	3	0	0	0	0	0.1	0	0	6.1	0	0	0	0	0	0	0	0	0	0	0	0	0.2	1.7	0.8	0	0	0	0	0	0	0.1	0	0	0	0.2	0	0	0	0	0	0	0	0	0
2002-07-08	0	0	0	0	0	0.8	0	0	0	0	0.3	0	0	2.4	0	0	0	0	0	0	0	0	0	0	0	0	2.2	2.5	0	0	0	2.2	0	0	0	0	0	0	1.2	0	0	0	0	0	0	0	0	0	0
2002-07-09	0	0	0	0	0	1.7	0	0	0	0	0.5	0	0	7.9	0	0	0	0	0	0	0	0	0	0	0	0	0	3.1	0.3	0	0	0.3	0	0	0	0.4	0	0	0.6	0	0	0	0	0	0	0	0	0	0
2002-07-10	0	0	0	0	0	1.7	0	0	0	0	0.1	0	0.8	13	0	0.2	0	2.4	0	0	0	0	0	0	0.8	1.4	3.7	0.3	0	0	0	0.6	0	0	0	0	0	0	0	0	0	0	0	0	0	0	0	0	0
2002-07-11	0	0	0	0	0	0	0	0	0	0	0	0	0	3.3	0	0	0	0	0	0	0	0	0	0	0	0.3	0	0	0	0	0	0	0	0	0	0	0	0	0	0	0	0	0	0	0	0	0	0	0
2002-07-12	0	0	0	0	0	0	0	0	0	0	0	0	0	0	0	0	0	0	0	0	0	0	0	0	0	0	0	0	0	0	0	0	0	0	0	0	0	0	0	0	0	0.2	0	0	0	0	0	0	0
2002-07-13	0	0	0	0	0	0	0	0	0	0	0	0	0	0.5	0	0	0	0	0	0	0	0	0	0	0	0	0	0	0	0	0	0	0	0	0	0	0	0	0	0	0	0.1	0	0	0	0.1	0	0	0
2002-07-14	0	0	0	0	0	8.1	0	0	0	0	2.7	0	0	1.5	0	0	0	0	0	0	0	0	0	0	0	0	2.5	2.8	0.3	0	0	0.6	0	0	0	0	0	0	1.7	0	0	0	0	0	0	0	0	0	0
2002-07-15	0	0	0	0	0.2	2.8	0	0	0	0	2.6	0	0	0.7	0	0	0	0	0	0	0	0	0	0	0	0	1.7	3.5	0.5	0	0	2.4	0	0	0	0.1	0.1	0.1	0.5	0	0	0	0	0	0	0	0	0	0
2002-07-16	0	0	0	0	0	0.6	0	0	0	0	0	0	0	2.7	0	0	0	0	0	0	0	0	0	0	0	0	5.1	2	0.3	0	0	0	4.2	0	0	0	0	0	0.4	0	0	0	0	0	0	0	0	0	0
2002-07-17	0	0	0	0	0	2.4	0	0	0	0	0	0	0	0	0	0	0	0	0	0	0	0	0	0	0	0	0	0	0	0	0	1.3	0	0	0	0	0	0	0	0	0	0	0	0	0	0	0	0	0
2002-07-18	0	0	0	0	0	0	0	0	0	0	0	0	0	0	0	0	0	0	0	0	0	0	0	0	0	0	0	0	0	0	0	0	0	0	0	0	0	0	0	0	0	0.1	0	0	0	0	0	0	0
2002-07-19	0	0	0	0	0	0	0	0	0	0	0	0	0	0	0	0	0	0	0	0	0	0	0	0	0	0	0	0	0	0	0	0	0	0	0	0	0	0	0	0	0	0.1	0	0	0	0	0	0	0
2002-07-20	0	0	0	0	0	0	0	0	0	0	0	0	0	0	0	0	0	0	0	0	0	0	0	0	0	0	0	0	0	0	0	0	0	0	0	0	0	0	0	0	0	0	0	0	0	0	0	0	0
2002-07-21	0	0	0	0	0	0	0	0	0	0	0.1	0	0.2	4.4	0	0	0	0.8	0	0	0	0	0	0	0.2	0.4	0.1	1.9	0.7	0	0	0.4	0	0	0	0	0	0	0.5	0	0	0	0	0	0	0	0	0	0
2002-07-22	0	0	0	0	0	0	0	0	0	0	0	0	1.2	23.2	0	1	0	1.2	0	0	0	0	0	0	1.2	0.4	3.3	14.8	0	0	0	0	0	0	0.6	0	1.9	0	2.4	0	0	0	0	0	0	0	0	0	0
2002-07-23	0	0	0	0	0	0	0	0	0	0	0	0	0	0	0	0	0	0	0	0	0	0	0	0	0	0	0	0	0	0	0	2.5	0	0	0	1.6	0.4	0	1.9	0	0	0.2	0	0	0	0	0	0	0
2002-07-24	0	0	0	0	0	0.4	0	0	0	0	0	0	0	1.5	0	0	0	0	0	0	0	0	0	0	0	0	3.4	0	0	0	0	4.6	0	0	0	0	0	0	0.4	0	0	0	0	0	0	0	0	0	0
2002-07-25	0	0	0	0	0	0	0	0	0	0	0	0	0	1.1	0	0	0	0	0	0	0	0	0	0	0	0	0	0	0	0	0	4.7	0	0	0	0	0	0	0	0	0	0	0	0	0	0	0	0	0
2002-07-26	0	0	0	0	0	0	0	0	0	0	0	0	0	0	0	0	0	0	0	0	0	0	0	0	0	0	0	0	0	0	0	0	0	0	0	0	0	0	0	0	0	0	0	0	0	0	0	0	0
2002-07-27	0	0	0	0	0	0	0	0	0	0	0	0	0	0	0	0	0	0	0	0	0	0	0	0	0	0	0	0	0	0	0	0	0	0	0	0	0	0	0	0	0	0.1	0	0	0	0	0	0	0
2002-07-28	0	0	0	0.1	0	0	0	0	0	0	0	0	0	0	0	0	0	0	0	0	0	0	0	0	0	0	0	0	0	0	0	0	0	0	0	0	0	0	0	0	0	0	0	0	0	0	0	0	0
2002-07-29	0	0	0	0	0	19.1	0	0	0	0	0	0	0	1.6	0	0	0	0	0	0	0	0	0	0	0	0	4.7	0	0	0	0	3.3	0	0	0	0	0	0	1.1	0	0	0	0	0	0	0	0	0	0
2002-07-30	0	0	0	0	0	12.4	0	0	0	0	0	0	0	11	0	0	0	0	0	0	0	0	1.3	1.3	0	1.4	0.7	0	0	0	0	2.5	3.8	0	0	0	0	0	0	0	0	0	0	0	0	0	0	0	0
2002-07-31	0	0	0	0	0	1.7	0	0	0.1	0	2.4	0	0.1	0.4	0	0	0	0.4	0	0	0.3	0	0	0	0.1	2.4	1.5	0	0	0.1	0	0	0	0	0	0	0	0	0	0	0	0	0	0	0	0	0	0	0
2002-08-01	0	0	0	0	0	0	0	2.1	0	0	0	1.2	0	0	0	0	1.2	0	0	0	0.2	0.3	0.3	0.3	0	0	0.4	0.3	0	0	0	0	0	0	0	0	0	0	0	0	0.1	0	0	0	0	0	0	0	0.3
2002-08-02	0	0	0	0	0	0	0	0	0	0	0	0	0	0	0	0	0	0	0	0	0	0	0	0	0	0	0.1	0	0.1	0	0	0	0	0	0	0.1	0	0	0	0	0.1	0.1	0	0	0	0	0	0	0
2002-08-03	0	0	0	0	0	0	0	0	0	0	0	0	0	0	0	0	0	0	0	0	0	0	0	0	0	0	0	0	0	0	0	0	0	0	0	5	0	0	0	0	0.1	0.1	0	0	0	0	0	0	0
2002-08-04	0	0	0	0	0	0.9	0	0.3	0	0	0	2.1	0	0	0.4	0	2.1	0	6.2	0.3	0	1	1.6	1.6	0	1.1	0	0	0	0	0	0	0	0	0	0	0	0	0	0	0	0	0	0	0	0	0.4	0.3	1
2002-08-05	0	0	0	0	1.3	1.3	0	0	0.1	0	0	0	0.2	0.9	0	1.8	0	0	0	0	0	0	0	0	0.2	0	1.7	2.9	0	0	0	0.9	0	0	0	0	0	0	0.7	0	0	0	0	0	0	0	0	0	0
2002-08-06	0	0	0	0	0.1	0.5	0	0	0	0	0.2	0	0	0	0	0	0	0	0	0	0	0	0	0	0	0	0.7	8	0	0	0	0.4	0	0	0	0	0	0	0	0	0.1	0.1	0	0	0	0	0	0	0
2002-08-07	0	0	0	0	0	0	0	0	0	0	0	0	0	0	0	0	0	0	0	0	0	0	0	0	0	0	1.7	0	0	0	0	0	0	0	0	0	0	0	0.4	0	0	0.1	0	0	0	0	0	0	0
2002-08-08	0	0	0	0	0	0	0	0	0	0	0	0	0	0	0	0	0	0	0	0	0	0	0	0	0	0	0	0	0	0	0	2.5	0	0	0	0	0	0	0	0	0	0	0	0	0	0	0	0	0
2002-08-09	0	0	0	0	0	0.1	0	0	0	0	0	0	0	0	0	0	0	0	0	0	0	0	0	0	0	0	0	0	0	0	0	0	0	0	0	0	0	0	0	0	0	0	0	0	0	0	0	0	0
2002-08-10	0	0	0	0	0	0	0	0	0	0	0	0	0	0	0	0	0	0	0	0	0	0	0	0	0	0	0	0	0	0	0	0	0	0	0	0	0	0	0	0	0	0	0	0	0	0	0	0	0
2002-08-11	0	0	0	0	0	0	0	0	0	0	0	0	0	0	0	0	0	0	0	0	0	0	0	0	0	0	0	0	0	0	0	0	0	0	0	0	0	0	0	0	0	0	0	0	0	0	0	0	0
2002-08-12	0	0	0	0	0	0.5	0	0	0	0	0	0	0	0	0	0	0	0	0	0	0	0	0	0	0	0	0	0	0	0	0	0	0	0	0	0	0	0	0	0	0	0	0	0	0	0	0	0	0
2002-08-13	0	0	0	0	0	0.5	0	0	0	0	0	0	0	0	0	0	0	0	0	0	0	0	0	0	0	0	2.5	0	0	0	0	0.3	0	0	0	0	0	0	0	0	0	0	0	0	0	0	0	0	0
2002-08-14	0	0	0	0	0	0	0	0	0	0	0	0	0	0	0	0	0	0	0	0	0	0	0	0	0	0	0	0	0	0	0	0	0	0	0	0	0	0	0	0	0	0	0	0	0	0	0	0	0
2002-08-15	0	0	0	0	0	0	0	0	0	0	0	0	0	0	0	0	0	0	0	0	0	0	0	0	0	0	0	0	0	0	0	0	0	0	0	0	0	0	0	0	0	0	0	0.1	0	0	0	0	0
2002-08-16	0	0	0	0	0	0	0	0	0	0	0	0	0	0	0	0	0	0	0	0	0	0	0	0	0	0	0	0	0	0	0	0	0	0	0	0	0	0	0	0	0	0	0	0	0	0	0	0	0
2002-08-17	0	0	0	0	0	0	0	0	0	0	0	0	0	0	0	0	0	0	0	0	0	0	0	0	0	0	2.7	0	0	0	0	0	0	0	0	0	0	0	0	0	0	0	0	0	0	0	0	0	0
2002-08-18	0	0	0	0	0	0	0	0	0	0	0	0	0	0	0	0	0	0	0	0	0	0	0	0	0	0	0	0	0	0	0	0	0	0	0	2.2	0	0	0	0	0	0.3	0	0.3	0	0	0	0	0
2002-08-19	0	0	0	0	0	0	0	0	0	0	0	0	0	0.4	0	0	0	0	0	0	0	0	0	0	0	0	0	0	0	0	0	0	0	0	0	0	0	0	0.6	0	0	0	0	0	0	0	0	0	0
2002-08-20	0	0	0	0	0	0	0	0	0	0	0	0	0	0	0	0	0	0	0	0	0	0	0.1	0.1	0	0	0.4	0	0	0	0	0.3	0	0	0	0	0	0	1.4	0	0	0	0	0	0	0	0	0	0
2002-08-21	0	0	0	0	0	0.2	0	0	0	0	0.5	0	0	1.3	0	0	0	0	0	0	0	0	0	0	0	0	0.6	0.1	0.2	0	0	0.1	0	0	0	0	0	0	0	0	0	0	0	0	0	0	0	0	0
2002-08-22	0	0	0	0	0	0	0	0	0	0	0	0	0	0	0	0	0	0	0	0	0	0	0	0	0	0	0.4	0.4	0	0	0	0	0	0	0	0	0	0	0.1	0	0	0	0	0	0	0	0	0	0
2002-08-23	0	0	0	0	0	0	0.1	0	0	0	0.2	0	0.9	0	0	0.7	0	3.9	0	0	2.5	0	0	0	0.9	0.1	0	0	0	0.1	0	0	0	0	0	0	0	0	0	0	0	0	0	0	0	0	0	0	0
2002-08-24	0	0	0	0	17.1	0	0.1	0.4	52.2	0.2	7.5	2.3	17.8	0.9	8.7	5.5	2.3	0.3	2.7	5.2	11.3	3.4	8	8	17.8	10.3	0.4	0.2	0	0	0	0.4	0	0	0	0	0	0	0	0	0	0	0	0	0	0	8.7	5.2	3.4
2002-08-25	0	0	0	0	0	1.2	0.2	0	0	0	0	0	0	0	0	0	0	0	0.5	0	4.6	0	0	0	0	0	0	0	0	0	0	0	0	0	0	0	0	0	0.2	0	0	0	0	0	0	0	0	0	0
2002-08-26	0	0	0	0	0	2.4	0	0	0	0	0	0	0	0	0	0	0	0	0	0	0	0	0	0	0	0	0	0	0	0	0	0	0	0	0	0	0	0	0	0	0	0	0	0.1	0	0	0	0	0
2002-08-27	0	0	0	0	0	1.3	0	0	0	2.5	0	0	0	0	0	0	0	0	0	0	0	0	0	0	0	0	0.4	1.4	0	0	0	0.2	0	0	0	0	0	0	0.1	0	0	0	3	2	0	0	0	0	0
2002-08-28	0	0	0	0	0	0	0	0	0	0	0	0	0	0	0	0	0	0	0	0	0	0	0	0	0	0	0.3	0	0	0	0	0.2	0	0	0	0	0	0	0	0	0	0.1	2	0.8	0	0	0	0	0
2002-08-29	0	0	0	0	0	0.1	0	0	0	0	0	0	0	0.5	0	0	0	0	0	0	0	0	0	0	0	0	0	0.1	0	0	0	0	0	0	0	0	0	0	0	0	0	0.5	0.8	0	0	0.1	0	0	0
2002-08-30	0	0	0	0	0	0	0	0	0	0	0	0	0	0	0	0	0	0	0	0	0	0	0	0	0	0	0	0.3	0	0	0	0.1	0	0	0	0	0	0	0	0	0	0.1	3.8	1.2	0.3	1.3	0	0	0
2002-08-31	0	0	0	0	0	0	0	0	0	0	0	0	0	0.1	0	0	0	0	0	0	0	0	0.1	0.1	0	0	0	0	0	0	0	0	0	0	0	0	0	0	0	0	0	0	0.2	1.8	0	0	0	0	0
2002-09-01	0	0	0	0	0	0	0	0	0	0	0	0	0	0	0	0	0	0	0	0	0	0	0	0	0	0	0.4	0.3	0	0	0	0.4	0	0	0	0	0	0	0.3	0	0	0	0	0	0	0	0	0	0
2002-09-02	0	0	0	0	0	2.4	0	0	0	0	0	0	0	0	0	0	0	0	0	0	0	0	0	0	0	0	0.5	0	0	0	0	0	0	0	0	0	0	0	0.1	0	0	0	0	0	0	0	0	0	0
2002-09-03	0	0.2	0	0	0	1.8	0	0	0	0	0	0.1	2.1	0	0	0.4	0.1	0	0	0	0.7	0	0.7	0.7	2.1	0.7	0.2	0	0	0	0	0	0	0	0	0	0	0	0.2	0	0	0	0	0	0	0	0	0	0
2002-09-04	0	0	0	0	0	0	0	0	0	0	0	0	0	0	0	0	0	0	0	0	0	0	0	0	0	0	0.1	0.9	0	0	0	0	0	0	0	0	0	0	0.3	0	0	0	0	0	0	0	0	0	0
2002-09-05	0	0	0	0	0	1.5	0	0	0	0.3	0	0	0	0	0	0	0	0	0	0	0	0	2	2	0	0	0.6	0.9	0.1	0	0	0	0	0	0	0	0	0	0	0	0	0	0	0	0	0	0	0	0
2002-09-06	0	0	0	0	0	39.9	3	0	0	0.1	0.9	0	0	0	0	0.1	0	2.5	0	0	4.1	0.3	0.9	0.9	0	0.7	0.2	0	0	0	0	0	0	0	0	0	0	0	0	0	0	0	0.3	0	0	0	0	0	0.3
2002-09-07	0	0	0	0	0	0	0	0	0	0	0	0	0	0	0	0	0	0	0	0	0	0	0	0	0	0	0	0	0	0	0	0	0	0	0	0	0	0	0	0	0	0	0	0	0.2	0	0	0	0
2002-09-08	0	0	0	0	0	1.4	0	0	0	0	0	0	0	0	0	0	0	0	0	0	0	0	0	0	0	0	0.1	0	0	0	0	0	0	0	0	0	0	0	2.8	0	0	0.1	0	0	0	0	0	0	0
2002-09-09	0	0	0	0	0	0	0	0	0	0	0	0	0	0	0	0	0	0	0	0	0	0	0	0	0	0	0	0	0	0	0	0.1	0	0	0	0	0	0	0	0	0	0.1	0	0.6	0.5	1.5	0	0	0
2002-09-10	0	0.1	0	0.4	0	0	0.5	3	0.2	0	0	3.3	2.6	0	0	5.8	3.3	3.7	0.1	0.1	0	1.2	3	3	2.6	1	0	0	0	2.3	0.4	0	0	2.2	0.2	0	0	0	0	1.1	2.8	0.1	0.1	0	0	0	0	0.1	1.2
2002-09-11	0	0	0	0	0	0	1.5	0.3	0	0	3.7	0.4	1.4	2.5	0	1.5	0.4	3.1	0	0.1	0.9	1.9	3.3	3.3	1.4	1.9	0	0.3	15.3	1.6	10	1.5	0.7	49	11.9	0	0	0	1.4	0	0	0	0	0	0	0	0	0.1	1.9
2002-09-12	0	0	0	0	0	0	0	0	0	0	0	0	0.4	0.4	0	0.4	0	0	0	0	0.5	0	0	0	0.4	0.1	0	0.5	0	0	1.9	0	0.8	0	9.4	0.5	0.1	0	0	0	0	0	0	0	0	0	0	0	0
2002-09-13	0	0	0	0	0	0	0	0	0	0	0	0	0	0	0	0	0	0	0	0	0	0	0	0	0	0	0	0	0	0	0	0	0	0	0	0.4	11.6	0	0	0	0	0.1	0	0	0	0	0	0	0
2002-09-14	0	0	0	0	0	0	0	0	0	0	0	0	0	0	0	0	0	0	0	0	0	0	0	0	0	0	0	0.1	0	0	0	0.4	0	0	0	0	0	0	0	0	0	0	0	0.3	0	0	0	0	0
2002-09-15	0	0	0	0	0	0.5	0	0	0	0	0	0	0	0	0	0	0	0	0	0	0	0	0	0	0	0	0.2	0	0	0	0	0	0	0	0	0	0	0.5	0.4	0	0	0	0	0	0	0	0	0	0
2002-09-16	0	0	0	0	0	0	0	0	0	0	0	0	0	0	0	0	0	0	0	0	0	0	0	0	0	0	0	0	0	0	0	0.2	0	0	0	0	0	0	0	0	0	0	0	0	0	0	0	0	0
2002-09-17	0	0	0	0	0	0	0	0	0	0	0	0	0	0	0	0	0	0	0	0	0	0	0	0	0	0	0	0	0	0	0	0	0	0	0	0	0	0	0	0	0	0	0	0	0	0	0	0	0
2002-09-18	0	0	0	0	0	1.8	0	0	0	0	0	0	0	0	0	0	0	0	0	0	0	0	0	0	0	0	0.4	0.2	0	0	0	0.5	0	0	0	0	0	0	0	0	0	0	0	0	0	0	0	0	0
2002-09-19	0	0	0	0	0	1	0	0	0	0	0	0	0	0	0	0	0	0	0	0	0	0	0	0	0	0	0.1	0.7	0	0	0	0.5	0	0	0	0	0	0	0.4	0	0	0	0	0	0	0	0	0	0
2002-09-20	0	0	0	0	0	0	0	0	0	0	0	0	0	0	0	0	0	0	0	0	0	0	0	0	0	0	1.3	0.2	0	0	0	0	0	0	0	0	0	0	0.2	0	0	0.1	0	0	0	0	0	0	0
2002-09-21	0	0	0	0	0	0.3	0	0	0	0	0.4	0	0	0	0	0	0	0	0	0	0	0	0	0	0	0	0.9	0.6	0	0	0.1	0.2	0	0	0	0	0	0	0.7	0	0	0	0.4	0	0	0	0	0	0
2002-09-22	0	0	0	0	0	0.3	0	0	0	0	0	0	0	0	0	0	0	0	0	0	0	0	0	0	0	0	0	0	0	0	0	0	0	0	0	0	0	0	0.7	0	0	0	0.1	0	0	0	0	0	0
2002-09-23	0	0	0	0	0	0.1	0	0	0	0	0	0	0	0.4	0	0	0	0	0	0	0	0	0	0	0	0	0	0.2	0	0	0	0	0	0	0	0	0	0	0	0	0	0	0	0	0	0	0	0	0
2002-09-24	0	0	0	0	0	0	0	0	0	0	0	0	0	0	0	0	0	0	0	0	0	0	0	0	0	0	0	0	0	0	0	0	0	0	0	0	0	0	0	0	0	0	0	1	0	0	0	0	0
2002-09-25	0	0	0	0	0	0.1	0	0	0	0	0	0	0	0.1	0	0	0	0	0	0	0	0	0	0	0	0	0	0.6	0	0	0	0	0	0	0	0	0	0	1	0	0	0.3	1.2	0.9	0	0	0	0	0
2002-09-26	0	0	0	0	0	0	0	0	0	0	0	0	0	0.1	0	0	0	0	0	0	0	0	0	0	0	0	0.5	0	0	0	0	0	0	0	0	0	0	0	4.9	0	0	0.5	0	0.2	0.4	0	0	0	0
2002-09-27	0	0	0	0	0	0	0	0	0	0	0	0	0	0	0	0	0	0	0	0	0	0	0	0	0	0	0.4	3.2	0	0	0	0	0	0	0	8.7	1.4	0	2.1	0	0	0	0	0	0.3	0	0	0	0
2002-09-28	0	0	0	0	0	0.2	0	0	0	0	0	0	0	0.6	0	0	0	0	0	0	0	0	0	0	0	0	0.3	0	0	0	0	0.5	0	0	0	0	0	0	0.8	0	0	0	0	0.3	0	0	0	0	0
2002-09-29	0	0	0	0	0	0	0	0	0	0	0	0	0	1.4	0	0	0	0	0	0	0	0	0	0	0	0.1	0.5	4.3	0	0	0	0.2	0	0	0	0.4	0	0	0	0	0	0	0	0.1	0	0	0	0	0
2002-09-30	0	0	0	0	0	0	0	0	0	0	0	0	0	0	0	0	0	0.2	0	0	0	0	0	0	0	0	0	0	0	0	0	0	0	0	0.1	0	0	0	0.9	0	0	0	0.5	1.4	0	0	0	0	0
2002-10-01	0	0	0	0	0	0	0	0	0	0	0	0	0	0	0	0	0	0	0	0	0	0	0	0	0	0	0	0	0	0.1	0	0	0	0	0	0	0	0	1.1	0	0.2	0.3	0	0.2	0	0	0	0	0
2002-10-02	0	0	0	0	0	0.1	1.8	0	0	0	0.4	0	0.2	0.4	0	0.1	0	0.2	0	0	0	0	0	0	0.2	0.2	1.7	0	0	0	0	0.3	0	0	0	0	0	0	0	0	0.7	3.6	0.2	0.7	0.3	0.2	0	0	0
2002-10-03	0	0	0	0	0	0	1.8	0	0	0	0	0	0	0	0	0	0	0	0	0	0.1	0	0	0	0	0	0	0	0	0	0	0.1	0	0	0	0	0	0	2.6	0	0	0.7	1.5	0	0.3	0.1	0	0	0
2002-10-04	0	0	0	0	0	0	0	0.1	0	0.4	0	0	0	0	0	3.8	0	2.2	0	0	0	0	0	0	0	0	0.8	1	0	0	0	0.1	0	0	0	0	0	0	0	0.1	0	0.9	3.9	0.2	29.6	0.2	0	0	0
2002-10-05	0	0	0	0	0	0	0	0.5	0	0	0.1	1.3	3.9	0.2	0	10.8	1.3	0	0	0	0	0.9	2.6	2.6	3.9	0.6	0	0	0	0	0	0	0	0	0	0	0.2	0	0	0	0	0.6	1.5	1.3	12.2	0.1	0	0	0.9
2002-10-06	0	0	0	0	0	0	0	0	0	0	0	0	0	0	0	0	0	0	0	0	0	0	0	0	0	0	0	0	0	0	0	0	0	0	0	0	0	0	0	0	0	0.8	13.3	0	0.7	1.7	0	0	0
2002-10-07	0	0.8	0	0	0	0	0	0	0	0	0	0	0	0	0	0	0	0	0	0	0	0	0	0	0	0	0	0	0	0	0	0	0	0	0	0	0	0	0	0	0	7.5	0.1	12.4	0	0	0	0	0
2002-10-08	0	0.2	0	0	0.9	0	0	0	0.3	0.3	0	0	0	0	0	0	0	0	0	0	0	0	0	0	0	0	0	0	0	0	0	0	0	0	0	0	0	0	0	0	0	0	0.4	0.4	0	0	0	0	0
2002-10-09	0	0.1	0	0.1	0.2	0.6	0	0	3	0	0	0	0	0	0	0	0	0	0.5	0	0.1	0	0	0	0	0	0	0	0	0	0	0	0	0	0	0	0	0	0.3	0	0.2	5	7.5	0.3	0	0	0	0	0
2002-10-10	0	0	0	0	0	0.3	0	0	0	0	0	0	0	0	0	0	0	0	0	0	0	0	0	0	0	0	0	0.1	0	0	0	0.1	0	0	0	0	0	0	1.3	0	0	0	0.5	0.4	0	0	0	0	0
2002-10-11	0	0	0	0	0	0.2	0	0	0	0	0	0	0	0	0	0	0	0	0	0	0	0	0	0	0	0	0	0	0	0	0.1	0.1	0	0	0	0	0	0	0	0	0	0	0	0	0	0	0	0	0
2002-10-12	0	0	0	0	0	0	0	0	0	0	0	0	0	0	0	0	0	0	0	0	0	0	0	0	0	0	0	0.2	0	0	0	0	0	0	0	0	0	0	0	0	0.4	0	0	0	0	0	0	0	0
2002-10-13	0	0	0	0	0	0.1	0	0	0	0	0	0	0.7	0.3	0	0.3	0	0.8	0	0	0	0	0.1	0.1	0.7	0.2	0	0	0	0	0	0	0	0	0	0	0	0	0	0	0	0	0	0	0	0	0	0	0
2002-10-14	0	0	0	0	0	0	0	0	0	0	0	0	0	0	0	0	0	0	0	0	0	0	0	0	0	0	0.1	0	0.3	0	0	0	0	0	0	0	0	0	0	0	0	0	0	0	0	0	0	0	0
2002-10-15	0	0	0	0	0	0	0	0	0	0	0	0	0	0	0	0	0	0	0	0	0	0	0	0	0	0	0	0	0	0	0	0	0	0	0	0	0	0	0	0	0	0	0	0	0	0	0	0	0
2002-10-16	0	0	0	0	0	0	0	0	0	0	0	0	0	0	0	0	0	0	0	0	0	0	0	0	0	0	0	0.1	0	0	0	0.3	0	0	0	0	0	0	0	0	0.1	0	0	0	0	0	0	0	0
2002-10-17	0	0.3	0	0	0	2.1	0	0	0	0	0	0	0	1	0	0	0	0	0	0	0	0	0	0	0	0	0.2	0.6	0	0	0	0.3	0	0	0	0	0	0	0	0	0	0	0	0	0	0	0	0	0
2002-10-18	0	0	0	0	0	2.5	0	0	0	0	0	0	0	0.1	0	0	0	0	0	0	0	0	0	0	0	0	0	0.7	0.1	0	0	0	0	0	0	0	0	0	0	0	0	0	0	0	0	0	0	0	0
2002-10-19	0	0	0	0	0	0.7	0	0	0	0	0	0	0	0	0	0	0	0	0	0	0	0	0	0	0	0	0.5	0	0	0	0	0	0	0	0.1	0	0	0	1.9	0	0	0	0	0.1	0	0	0	0	0
2002-10-20	0	0	0	0	0	0	0	0	0	0	0	0	1.8	0	0	0.1	0	3.2	0	0	0	0	0.2	0.2	1.8	3.7	0	1.3	0	0	0	0	0	0	0	0	0	0	1.5	0	0.3	0	0.5	1.3	0	0	0	0	0
2002-10-21	0	0	0	0	0	0	0	0	0	0	0	0	0	0	0	0	0	0	0	0	0	0	0	0	0	0	0.6	0	0	0	0	0	0	0	0.1	0	0.2	0	0	0	0	0	0	0	0	0	0	0	0
2002-10-22	0	0	0	0	0	0	0	0	0	0	0	0	0	0	0	0	0	0	0	0	0	0	0	0	0	0	0	0	0	0	0	0	0	0	0	0	0	0	0	0	0	0	0	1.1	0	0	0	0	0
2002-10-23	0	0	0	0.4	0	0	0.4	0	0	0	0	0	0	0	1.9	0	0	0	0	0	1.8	0	0	0	0	0	0	0	0	0	0	0	0	0	0	0	0	0	0	0	0	0	0	0	0	0	1.9	0	0
2002-10-24	0	0	0	0	4.6	4.7	1.4	0.9	5.5	17	0	3.8	4.5	0	3	1.9	3.8	4.7	1.8	6.8	2.2	9.6	3.6	3.6	4.5	1.1	0.2	1.6	0.2	1.4	0	0.3	0	0	0	0	0	0	0.1	0	1.2	0	1.7	0.7	0	0	3	6.8	9.6
2002-10-25	6.2	2.8	5.1	2.9	3.3	44.9	1.3	0	0.2	0	5.4	0.8	4.4	5.6	0	0.6	0.8	4.8	0.1	0	7.2	0.6	5.8	5.8	4.4	7	7.6	2.8	7.9	7.3	8.4	1	0	1.9	0	0	0	0	0.9	0	14	0.9	1.2	0.3	3.2	4.9	0	0	0.6
2002-10-26	0	2	0	0	1.5	3.2	1.9	1.3	0	0	0.5	0.1	6	0	0.5	3.2	0.1	5.4	0.6	4.5	0	0	0.3	0.3	6	0.1	0	0	0	0	0	0.4	0	0	0	0	0	0	0.4	0	0	0.2	10.7	0.2	0	0	0.5	4.5	0
2002-10-27	0	0	0	0	0	0.2	0	0	0	0	0	0	0	0	0	0	0	0	0	0	0	0	0	0	0	0	0	0	0	0	0	0.5	0	0	0	0	0	0	0	0	0	0.6	2.2	0.5	1.3	8.8	0	0	0
2002-10-28	0	0	0	0	0	0	0	0	0	0	0	0	0	0	0	0	0	0	0	0	0	0	0	0	0	0	0	0	0	0	0	0	0	0	0	0	0	0	0	0	0	6	3.1	0	4.9	7.7	0	0	0
2002-10-29	0.6	0	0	0.5	0.3	0	0	0	0.6	0	0	0	0	0	0	0	0	0	0	0	0	0	0	0	0	0	0	0	0	0	0	0	0	0	0	0	0	0	0	0	0	0	0.6	2.5	0.9	0.4	0	0	0
2002-10-30	2.4	1.5	0.2	0.2	2.6	0	0	0	0.4	0	0	0	0	0	0	0	0	0	0	0	0	0	0	0	0	0	0.1	0	0	0	0	0	0	0	0	0	0	0	0	0	0	0	0	0	1.7	0.2	0	0	0
2002-10-31	0.7	53.2	0	0.2	0	0	0	0	0	0.7	0	0	0	0	1.3	0	0	0	0	0	18.7	2.1	0	0	0	0	0.1	0	0	0	0	0.2	0	0	0	0	0	0	0.2	0	0	0.1	1.1	37.7	1.8	0	1.3	0	2.1
2002-11-01	0	0	0	0	0.3	0	1.3	0.3	0.3	0	0.2	2.6	0.5	3.4	0	0.4	2.6	0.3	0	0.8	2.9	1.7	1.4	1.4	0.5	0.6	0	0.7	0	0	0	0.2	0	0	0	0	0	0	0.2	0	0.1	0.7	0	1.6	0.2	6.4	0	0.8	1.7
2002-11-02	0	0	0	1.4	0	0	17.4	0	0	0	0	0	0.1	2.5	0	0.1	0	0	0	0	0	0	0	0	0.1	1.3	0	0	0	0	0	1.3	0	0	0	0	0.1	0	0.9	0	0	0	1.4	0.7	0.2	2.7	0	0	0
2002-11-03	0	0	0	2.3	0.3	0.2	0	0	0	2.7	0	0	0	0.3	0	0	0	0	0	0	0	0	0	0	0	0	0	0	0	0	0	0.6	0	0	0	0	0	0	0	0	0	2.8	5.3	34.3	0.2	0	0	0	0
2002-11-04	0	0	0	0	0	0	0	0	0	0	0	0	0	0	0	0	0	0	0	0	0	0	0	0	0	0	0	0	0	0	0	0	0	0	0	0	0	0	0	0	0	0	0	2.4	0.9	0.1	0	0	0
2002-11-05	22.3	6.2	7.6	15	0	0	0	0	0	0	0	0	0	0	0	0	0	0	0	0	0	0	0	0	0	0	0	0	0	0	0	0	0	0	0	0	0	0	0	0	0.1	0	7.4	10.4	7.5	6.1	0	0	0
2002-11-06	6.5	23	3.6	1	1.2	0	8.5	2.9	0	27.4	0	0.8	3.5	2.3	0	3.9	0.8	0	0	0.4	29.7	0.3	2.6	2.6	3.5	3.5	0	0	0	12.3	0.1	0	0	0	4.5	0.5	4.5	7.8	0	0.1	51.4	0.1	8.9	0.1	11.4	7	0	0.4	0.3
2002-11-07	0.7	5.9	0.4	0	0.4	25.2	0	0	0	0	0	0	0	0	0	0	0	0	0	0	0	0	0	0	0	0	0	0	0	0	0	0	1.7	0	3.6	19.5	5.2	3.1	37.7	17.4	0	0	0	1.9	0	0	0	0	0
2002-11-08	0	0	0	0	0	0	0	0	0	0	0	0	0	0	0	0	0	0	0	0	0	0	0	0	0	0	0	1.4	0	0	0	0.9	0	0	0	0.4	0.6	1.6	110.2	35.1	0.4	0	5.1	0	0	0	0	0	0
2002-11-09	0	0	0	0	0	0	0	0	0	0	0	0	0	0	0	0	0	0	0	0	0	0	0	0	0	0	0	0	0.1	1.4	0	1.2	0	0	1.8	0	0.1	2.4	0.2	0	0	0	13.8	2.7	0	0	0	0	0
2002-11-10	8	5.9	1.9	0.4	0	0	0	0	0	0	0.1	0	0.9	3.2	0	0	0	0.1	0	0	0.3	0	0.1	0.1	0.9	0.6	1.5	0.3	1.3	7.3	28.9	2.3	1.2	27.7	3.5	0	0	0.7	0.1	3.5	3.7	0	5.4	1.1	0	0	0	0	0
2002-11-11	0	3.1	0	1.1	0	0	0	0	0	0	0	0	0	0	0	0	0	0	0	0	0	0	0	0	0	0	0	0	0	0	0	0	0	0	1.5	1.9	7.7	5.1	1.3	1.1	0	0	11	0.7	0	0.1	0	0	0
2002-11-12	0	0	0	0	0	0	0	0	0	0	0	0	0	0	0	0	0	0	0	0	0	0	0	0	0	0	0	0	0	0	0	0	0	0	0	0	0	0	0	0	0	4.6	0.4	5.9	0	0	0	0	0
2002-11-13	0	0	0	0	0	0	0	0	0	0	0	0	0	0	0	0	0	0	0	0	0	0	0	0	0	0	0	0	0	0	0	0	0	0	0	0	0	0	0	0	0	0	0	1.8	0	0	0	0	0
2002-11-14	0.2	0	1.7	0	0	0.4	0	0	0	0	0	0	0	0	0	0	0	0	0	0	0	0	0	0	0	0	0	0	0	0	0	1.7	0	0	0	0	0	0	0	0	0	0.5	0.1	0	0.4	0	0	0	0
2002-11-15	0	0	0	0	0	0.4	0	0	0	0	0.1	0	1	0	0	0	0	0	0	0	0	0	0.2	0.2	1	2.2	4.5	0	0	23.6	19.5	0.8	0.3	0	0	0	0	0	0	0	2.7	5.5	0.4	8.2	12.1	1.1	0	0	0
2002-11-16	0	0	0	0	0	0.6	0	0	0	0	0	0	0	0	0	0	0	0	0	0	0	0	0	0	0	0	0	0	0	0	0	0.7	0.7	0	0.1	0.1	0.4	0	0	0	0.1	8.5	14.3	2.2	0	0	0	0	0
2002-11-17	0	0	0	0	0	0.1	0	0	0	0	0	0	0	0	0	0	0	0	0	0	0	0	0	0	0	0	0.2	0.9	0	0	0	1	0	0	0	0	0	0	0	0	0.2	0	0.4	1.2	0.1	0	0	0	0
2002-11-18	0	0	0	0	0	0	0	0	0	0	0	0	0	0	0	0	0	0	0	0	0	0	0	0	0	0	0.1	0.5	0.1	0	0	40.4	0.1	0.4	0	0	0	0	0	0	0.1	0.2	6.6	5.6	0	0.1	0	0	0
2002-11-19	0	0	0	0	0	0	0	0	0	0	0	0	0	0	0	0	0	0	0	0	0	0	0	0	0	0	0	0	0	0	0	0	0	0	0	0	0.4	0	0	0	0	0	0	0	0	0	0	0	0
2002-11-20	0	0	0	0	0	0	0	0	0	0	0	0	0	0	0	0	0	0	0	0	0	0	0	0	0	0	0	0	0.3	2.5	0.1	0	0	0	0	0	0	1.7	0	0.2	2.1	0	4.7	0	0	0	0	0	0
2002-11-21	0	0	0	0	0	0	0	0	0	0	1.8	0	0.9	0	0	0.4	0	2.7	0	0	0	0	0	0	0.9	0	0.4	3.5	0	1.5	3	0	0	0	0	0	0	0	0	5	1.9	0.3	0.1	0	0	0	0	0	0
2002-11-22	0	0	0	0	0	0.2	0	0	0.3	0	0	0	0	0	0	0	0	0.2	0	0	0	0	0	0	0	0	0	0	0	0	0	0	0	0	0	1	0.9	0	0	0	11.5	0	0.3	3.3	0	0	0	0	0
2002-11-23	0	0	0	0	0	0	0	0	0	0	0	0	0	0	0	0	0	0	0	0	0	0	0	0	0	0.3	0	0	0	0	0	0	0	0	0	0	0	0	0	0.2	0	0	0	1.4	0	0	0	0	0
2002-11-24	35.4	9	15.8	4.2	29.4	0	32.3	7.3	5.3	19.1	0.6	2.5	15.4	2.6	4.8	10.6	2.5	8.9	8.2	0.4	1.5	1.6	13.7	13.7	15.4	11.8	3.3	0	0.8	0.2	0.2	0	0	4.3	0	0	0	0	0	0	0.9	0.2	10.8	1.7	0	0.5	4.8	0.4	1.6
2002-11-25	7.4	10	6.3	6.2	0	0.2	2.1	1.2	2.3	0	0.9	0.9	0.2	1.2	0	0.2	0.9	2.1	0.1	0	0.9	2.2	0	0	0.2	0.1	0	0	0	1	7.4	0	0	16.2	4.4	0	0	0	1.1	0	0.2	0.7	1.5	1.5	0	0	0	0	2.2
2002-11-26	0	0	0	0	0	0	0	0	0	0	0	0	0	0	0	0	0	0	0	0	0	0	0	0	0	0	0	0	0	0	0	0	0	0	6.7	34.1	35.3	4.1	13.6	7.6	0	4.8	1.3	0	0	0	0	0	0
2002-11-27	0	0	0	0	0	0	0	0	0	0	0	0	0	0	0	0	0	0	0	0	0	0	0	0	0	0	0.7	0	0	0	0	0	0	0	4.8	0.2	0.1	0	0.6	1.3	0	4.3	0.4	15.6	0	0	0	0	0
2002-11-28	0	0	0	0	0	0	0	0	0	0	0	0	0	0	0	0	0	0	0	0	0	0	0	0	0	0	0	0.3	0	0	0	0.1	0	0	0.1	0	0	0	0	0	0	14.4	11.4	1.9	0	0.2	0	0	0
2002-11-29	0	0	0	0	0	5.7	0	0	0	0	0	0	0	0	0	0	0	0	0	0	0	0	0	0	0	0	0	0.4	0	0	0	0	0	0	0	0	0	0	0	0	1	8.4	0.1	0	0	0.1	0	0	0
2002-11-30	0	0	0	0	0	0.5	0	0	0	0	0	0	0	0	0	0	0	0	0	0	0	0	0	0	0	0	0	0.2	0	0	0	0.1	0	0	0	0	0	0	0	0	0	5.7	80.2	1.5	0	0	0	0	0
2002-12-01	0	0	0	0	0	0.2	0	0	0	0	0	0	0	0	0	0	0	0	0	0	0	0	0	0	0	0	0	0	0	0	0	0.1	0	0	0.4	7.7	10.8	6.2	0	0	0	0	0.1	4.1	0	0	0	0	0
2002-12-02	0	0	0	0	0	0	0	0	0	0	0	0	0	0	0	0	0	0	0	0	0	0	0	0	0	0	0.1	0	0	0	0	0	0	0	0	0.3	0	0	0.3	0.1	0.2	0	9.6	4.9	0	0	0	0	0
2002-12-03	0	0	0	0	0	0	0	0	0	0.1	0	0	0	0	0	0	0	0	0	0	0	0	0	0	0	0	0	0.1	0	0.7	0	1.2	0	0	0	0	0	0	0	0	1.1	2.2	1.3	1.5	0	0	0	0	0
2002-12-04	0	0	0	0	0	0	0.2	0.1	0	0	0.1	0.1	0	0.2	0	0	0.1	0	0	0	0.1	0.1	0	0	0	0	0.6	1.1	2.4	0.1	0	1.1	0	0	0	0	0	0	0	0	0.5	0.8	1.3	15.3	0	0	0	0	0.1
2002-12-05	0	0	0	0	0	0	0.1	0.6	0	0	0.3	0.9	0.3	0	0	0.2	0.9	0.1	0	0	0.7	1.1	0.6	0.6	0.3	0.4	0.7	0.2	3.1	0	1	5.3	0	0	0	0	0	0	0.2	0	0.5	0.5	0	2	1.2	0.8	0	0	1.1
2002-12-06	0	0	0	0	0	0	0	0	0	0	0	0	0	0	0	0	0	0	0	0	0	0	0	0	0	0	1.5	0.2	0	0	0	0.1	0.5	0	0	0	0	0	0	0	0	1.5	4.8	17.1	0.4	0.8	0	0	0
2002-12-07	0	0	0	0	0.1	0.1	0	0	0	0	0	0	0	0	0	0	0	0	0	0	0	0	0	0	0	0	0	0.7	0	0.1	0	1.4	1.1	0	0	0	0	0	0	0	1.5	9.7	6.1	0.8	0.1	1	0	0	0
2002-12-08	0	0	0	0	0	0.1	0	0	0	0	0	0	0	0	0	0	0	0	0	0	0	0	0	0	0	0	0	0.4	0	0	0	0	1.8	0	0	0	0	0	0	0	0	0.4	9.8	0.2	1.1	1.8	0	0	0
2002-12-09	3.5	10	2.7	4.7	0	0	10.9	2.1	0	2.6	0.6	0.8	1.4	1.1	0	1	0.8	0.8	0	0	0.4	0.4	1.3	1.3	1.4	1.8	0.4	0.7	0	0	0	2.4	0	0	0	0	0	0	0	0.1	0.5	0.9	21.1	5.7	12.2	2.1	0	0	0.4
2002-12-10	3.7	12.6	6.4	2.7	17.5	1.2	66.3	2.8	11.6	15	0.9	1.5	0.2	26.2	15	1.3	1.5	4.4	13.4	4.2	11.8	5.9	1	1	0.2	2	0.4	0.1	13.3	7.5	19.6	0.6	24.8	28.7	50	15.7	36.2	19	0.2	12.5	20.7	0	0.3	0	2.1	6	15	4.2	5.9
2002-12-11	0.1	0.3	0	3.4	2.8	5	5.8	0	0	5.6	0.9	0	0	0.1	0.3	0	0	0.1	0	0.3	1	0	0	0	0	0	5.6	5.9	3.2	16	31.4	2.6	23.8	6.7	5.9	9.4	29.2	18.1	9.5	0	12.3	12.2	0.3	0.2	0	0	0.3	0.3	0
2002-12-12	0	0	0	0	0	0	18.5	0	0	0	20.4	0	0	2.2	0	0.2	0	14.4	0	0	0.1	0	0.1	0.1	0	0.3	2.6	5.6	5.5	4.4	10.8	34.9	3	7.4	10.2	0.9	0	14.7	0	0	11.4	0.1	24.8	2.7	19.9	3.7	0	0	0
2002-12-13	0.6	6.2	1	0	0.2	0.4	6.7	0	0.3	0	0	0	2.4	4.1	0	1.8	0	6.1	0.5	0.1	0	0	0.1	0.1	2.4	2.5	30.4	42.8	3.6	1.9	1.8	40.9	52.4	6.3	3.4	3.4	11.7	5.1	2.3	2.5	14.1	0	1.4	6.2	9.9	25.9	0	0.1	0
2002-12-14	9	0	0.6	4.4	12.3	27.1	2.1	7.1	25.6	2.5	9.8	5.4	1.4	12.3	66.2	2.6	5.4	5.4	72.7	76.8	3.1	5.8	1.3	1.3	1.4	2	0.2	0	1.4	4.9	8.5	4.1	0	2.9	10.5	0	0	38.9	0	1.2	14.2	0	0	0.2	0	0	66.2	76.8	5.8
2002-12-15	0	0.8	0.5	0.4	0.2	0.6	21.8	0.5	0.1	5.5	56.9	0.2	0	0	0	0.5	0.2	0.4	0	0	0.1	0	0.6	0.6	0	0	156.8	97.3	88.2	3.2	14.7	250	130.9	4.2	14.6	0.1	1.8	14.8	33.1	20.4	15.8	0	0	7.9	0	0	0	0	0
2002-12-16	0	3.3	0	0.1	4.3	0.1	0	0	0	4.6	6.5	0	0	0.2	0	0	0	0.2	0	0	0	0.6	0.2	0.2	0	0.4	2	0.2	9.3	4.3	1.2	0.4	0.7	0.2	0.6	0	0.1	0.1	1.3	3.2	0	0.1	6.7	0	10.9	11.1	0	0	0.6
2002-12-17	96.9	4.7	2.6	7.2	0	0	1.2	0	1.5	26.2	1.6	0	0.7	0	0	2	0	2.6	0.2	0	0.2	0	0.1	0.1	0.7	1.3	7.8	1	8	13.3	10.6	0.1	0.1	15.4	1.7	0	0	1.2	0	2.9	5.8	0.4	6.1	2.5	0.8	34.7	0	0	0
2002-12-18	6.5	80.9	0.2	52.4	0	0	22.9	0.1	0	0.1	0.3	0.3	1.7	3.7	3	1.5	0.3	7.3	0.1	3.3	0.5	0.3	0.2	0.2	1.7	1.6	10.8	2.5	12.6	1.4	0.2	0.9	1.1	9.9	1.4	5.8	3.6	0	46.6	22.7	5	2.7	17.9	3.7	3.6	0.2	3	3.3	0.3
2002-12-19	0	0.3	0	0	0	0	0.3	1.3	1.2	0	0.8	1.7	5.7	4.7	0.2	2.1	1.7	3.7	0	2	3.3	3.1	8.1	8.1	5.7	8.8	0.4	0.2	0.1	3.7	0.6	0	4.5	1	2.2	2.7	1.6	13.7	10	2.9	21.3	7.6	30	3.2	0	2.2	0.2	2	3.1
2002-12-20	5.3	3.1	0	0	0	0.1	0.5	1.8	0	0	8	2.5	7.6	5.4	1.8	15.3	2.5	24	1.4	1.6	7.8	3.7	6.3	6.3	7.6	4.8	0.5	9.5	0.4	0	0	2.3	1.9	0.8	7.5	2.4	1.6	0.7	4.2	2.1	1.7	5.3	2.1	5.4	0	0.5	1.8	1.6	3.7
2002-12-21	0	0	0	0	0	1.6	0.1	0	1.2	0	0	0	1.9	0	0.1	0.5	0	4.8	0	0.2	0	0	0	0	1.9	0.8	0.2	1.4	3.8	7.1	2.5	2.8	1.8	0.1	3.3	26.6	15.7	15	7.4	3.7	6.9	22	0.8	1.9	0	0	0.1	0.2	0
2002-12-22	0	0	0	0	0	0.8	0	0	0	0	0.4	0	0	0.4	0	0	0	0	0	0	0	0	0	0	0	0	3.7	6.8	3.7	17.1	15.6	10	22.5	0.3	1.7	11.9	11	6.8	32.5	19.6	2.4	2.3	6.4	7.6	5	0	0	0	0
2002-12-23	0	0	0	18.7	0	0.7	1.4	0.1	0	0	0.2	0	0.2	5.9	0	0.2	0	0.4	0	0	0	0.1	1.8	1.8	0.2	5.3	3.1	4.2	8.3	2.1	8	8.6	49	1	8.2	35.5	17.2	5.4	0.8	4.5	3.6	28.6	4.6	5.1	8.2	0.3	0	0	0.1
2002-12-24	0	2.9	0	0.7	14.3	0.1	6.7	12.2	28.4	3.7	1	16.8	17.9	7.2	55.9	41.1	16.8	21.9	83.3	23.9	45.7	30.9	28.5	28.5	17.9	20.2	0.1	12.3	0.1	1	0.2	6.2	22.9	9.7	8.2	30	11.1	12.2	5.7	7.4	0	36.5	9.6	7.5	22.1	7.8	55.9	23.9	30.9
2002-12-25	4.2	33.6	8.4	2.8	4.5	0	23.2	0.3	18.2	8.7	18.3	0.1	8.2	4.4	10.7	19.1	0.1	17.3	14.3	8.3	11.3	2.9	6.4	6.4	8.2	9	21.2	34	48.5	6.4	13.2	36.7	24.8	15.1	15.4	21.3	11.1	8.3	2	25.1	7.7	1.3	22.4	14.1	0.4	0	10.7	8.3	2.9
2002-12-26	2	2.6	0	0.4	0	0.2	13.9	0	6.9	2.9	0.9	0	0	0.6	0.1	0	0	0	0.1	0	0.6	0	0	0	0	0	4.6	0.2	2.8	8.1	6.8	10.7	12.9	39.9	3.4	7.2	7.3	14.3	14.4	2.5	10.8	0	35.6	5.2	0	0	0.1	0	0
2002-12-27	0	2.6	0	0	0	0	2.8	0	0	0	0.3	0	0	0	0	0	0	0	0	0	0	0	0	0	0	0	0	0	1.2	3	2.4	2.6	2.3	1.8	30.1	0.9	3.9	2.4	0	4.3	2.8	0.5	24.1	1	2.9	0.1	0	0	0
2002-12-28	0	1	0	0	0	0	0	0	0	0	0	0	0	0	0	0	0	0	0	0	0	0	0	0	0	0.5	0	0	1.2	0	0	0	0.8	0.2	5	3.8	14.7	21.2	1.5	5.8	0	0	2.1	1.9	0.1	6.1	0	0	0
2002-12-29	0	3.2	0	2.2	0	0	8.8	0	0	0	0	0	0	0	0	0	0	0	0	0	0	0	0	0	0	0	0	3.1	0.8	6.1	2	0.5	0.3	15.4	9.3	3.3	7.3	15.3	3.1	14.9	2.8	0	0	10.6	1.4	0.8	0	0	0
2002-12-30	0	0	0	0	0	0.5	0.4	0	0	0	0	0	0	0	0	0	0	0	0	0	0	0	0	0	0	0	0	8.8	0.1	12.2	9.4	14.5	3.4	4.7	6.7	5.2	4.5	4.2	3.3	8.4	3.1	0	7.9	12.3	0.7	0.4	0	0	0
2002-12-31	0	0	0	0	0.2	0.3	0	0	5.6	0	0	0	0	0	0	0	0	0	0	0	0	0	0	0	0	0	0.1	1.2	0	1.2	7.2	3.4	14.3	0.9	1.3	6.5	25.2	32.7	21.8	4.1	0.2	2.9	0.6	0.3	1.3	0.3	0	0	0
2003-01-01	0	0	0	0	33.4	14	1.9	9.6	33.1	0	8.7	9.1	8.6	11.8	13.1	6.4	9.1	7.9	19.8	12.3	29.1	9.9	10.9	10.9	8.6	10.8	6	6.5	4.9	5.8	6.1	2.7	3.9	1.9	3.7	6.3	17.3	18.4	7.7	12.7	2.2	0	8.7	13.4	0	0	13.1	12.3	9.9
2003-01-02	0.1	0.8	0.6	3.3	23.1	1.2	28.5	21.3	22.3	0.3	45.1	26.5	22.4	27.3	40.4	24.5	26.5	33	29.4	38.4	42.2	31	23.3	23.3	22.4	23.7	32.7	21.2	37.7	17.4	15.4	10.2	1.5	3.3	0.1	0	0.1	1.1	14.2	14.4	26.5	0	4.3	6	0	0	40.4	38.4	31
2003-01-03	0	5.8	5.1	0	22.8	4.1	4.3	41.1	13.1	0.4	39	37.8	48.4	22.6	18.1	45.8	37.8	42.7	20.3	15.9	11.8	19.5	23.8	23.8	48.4	36.4	18.1	48.4	42.6	21.1	23.7	27.4	15.4	32.3	4.9	2.2	6.1	13.4	2.7	0.3	22.9	28.5	0.3	4.4	0	2.1	18.1	15.9	19.5
2003-01-04	30.3	4.5	15.1	13.8	45.7	2.2	11.2	15.7	14.8	1.8	5.6	11.5	8.4	10.5	1.4	19.4	11.5	2.2	10.5	2	1.8	8.1	5.7	5.7	8.4	2.4	5.9	24.3	27.2	1.8	4.9	31.2	14.8	8.6	0.6	1.7	5.7	22.5	0	0	5.2	3.7	0	0.4	0	0	1.4	2	8.1
2003-01-05	6.6	7.5	0.8	15.6	6.1	2.8	0.9	2.8	3.2	0.6	1	4.2	16.8	0.7	0.5	12.2	4.2	14.5	5.4	0.2	8.5	4	9.7	9.7	16.8	10.9	0.5	3.8	2.1	1	0.2	0	0	0	10.3	0.5	11.1	35.4	9.4	2.3	12.6	3.4	0.5	0.6	0	0	0.5	0.2	4
2003-01-06	0	0	0	0	0	5.1	0	0	0.1	0	0	0	0	0	0	0	0	0	0	0	0	0	0	0	0	0	0	0	0	0	0.6	0	0.3	0	1.2	27.5	0	0.1	10.1	23.4	0	6.2	0.1	0.1	0	0	0	0	0
2003-01-07	0	0	0	0	0	0.7	0	0	0	0	1.8	0	0	0.3	0	0	0	0	0	0	0	0	0	0	0	0	4.7	0	1	2.4	1	1.3	4.8	19.9	8.9	41.4	18.5	9.8	5.2	2.2	4.2	1.2	0.4	4.2	0	0	0	0	0
2003-01-08	2.6	0	37.8	0	0	0.5	0	0.2	0	0	1.2	3.8	4.7	2.9	0	8.9	3.8	22.8	0	0	0.9	27.3	42	42	4.7	8.5	2.6	0	43.2	0.4	4	0	0	0.6	2.3	0.4	1.5	9.8	27.3	11	0.3	0.2	7.8	0	1.9	63	0	0	27.3
2003-01-09	1.7	39.6	8.2	0.8	0.3	0	3.1	0.1	0.1	51.9	0.9	0	4.8	0.1	2.5	12.9	0	22.3	0	0	1.1	0	0.3	0.3	4.8	1	5.3	0	0	0.3	4.2	0	0	0.1	0.1	3	4.2	13.5	1.7	1.5	0	0.8	0.2	8	0.1	0	2.5	0	0
2003-01-10	28.6	15.1	14.6	28.1	133.9	2.5	19.6	20.5	51.8	29.9	8	29.7	21.1	6	31.3	28.9	29.7	25.3	52.4	37	10.4	14.8	14.6	14.6	21.1	9	8	4.7	42.5	4.5	3.1	13.1	16.4	27.2	0.2	3.7	2.1	0.3	3.4	2.4	19.1	0	2.8	13.5	45.6	29.1	31.3	37	14.8
2003-01-11	0.5	1.1	0.5	0.9	6.1	0.4	5.6	18.5	22.8	0	5.1	45.4	5.9	5	15.8	7.6	45.4	11.7	16.9	11.9	63	57.2	42.6	42.6	5.9	15.7	3.2	8	4	12.5	22.8	2.3	19.6	0	5.6	22.9	8.2	2.6	5	3.8	57.6	0	17	9.8	0	0	15.8	11.9	57.2
2003-01-12	0	0	0	0	0.4	11	0	0	0	0	0	0	0.1	0	0	0	0	0	0	0	0	0	0	0	0.1	0.6	20.8	4.2	5.1	7.3	3	5.8	63.5	0	0.5	0.5	2.7	2.5	11.4	20.3	12	0	5.4	22.9	0	0	0	0	0
2003-01-13	0	0	0.1	0	0	0.3	0	0	0	0	1.4	0	0	0	0	0	0	0	0	0	0	0	0	0	0	0	4.2	0.2	7.2	2.8	6.1	3.7	10.2	12.9	11.8	6.1	0.3	0.9	0.3	0.5	1	0	0	0.5	0	0	0	0	0
2003-01-14	0	0	0	0	0	2	0	0	0	0	0	0	0	0	0	0	0	0	0	0	0	0	0	0	0	0	0.2	0	0	0	0	1.3	0	0	2.4	0.2	7.3	6.3	22.6	6.8	0	0	39.3	0.2	0	0	0	0	0
2003-01-15	0	1	0	0	0	0	0	0	0	0	0.2	0	0	0	0	0	0	0	0	0	0	0	0	0	0	0	0	0.7	0	0	0	0	0	0	6.1	0	0.5	0.7	1.2	8.4	0	4.9	4.8	0	0.2	0	0	0	0
2003-01-16	0	0	0	0	0	0	0	0	0	0	0	0	0	0	0	0	0	0	0	0	0	0	0	0	0	0	0.3	0	0	0	0	0	0	0	0.5	0.2	1	0	15.3	0.2	0	0.3	0	0	0.7	1.3	0	0	0
2003-01-17	0	0	0	0	0	0	0	0	0	0	0	0	0	0	0	0	0	0	0	0	0	0	0	0	0	0	0	0	0.3	0	0	0	0	0	0.7	0.1	0.8	0	9.6	1.8	0	3.5	0	0	8.7	6.4	0	0	0
2003-01-18	0	0.1	0	0	0	0	0	0.1	0	0	0.1	0.1	0	0.1	0.3	0.9	0.1	4.5	1.4	3.3	7.8	0.6	0.6	0.6	0	0.2	7.6	0	3.7	0	0	0.3	0	0.1	2.5	0	1.7	1	23	6	0.1	2.3	3	0.1	0	0	0.3	3.3	0.6
2003-01-19	1.6	0.6	0	0	0	0.4	0.1	0	0	0	0.8	1.8	6.1	6.2	1.8	5	1.8	3.7	0.2	0.5	2.7	3.1	0	0	6.1	4.4	0	1.1	6.1	10.2	15.8	0.8	1.4	0	0.2	0	0	0	0.7	0.5	4.9	1.2	0.3	1.9	2.3	0.2	1.8	0.5	3.1
2003-01-20	0.2	0	0	0	0	0.8	3.3	0	0	4.6	1	0	14.9	1.7	0	31.8	0	48.7	0.1	0	4.3	0.2	0.8	0.8	14.9	1.3	1.4	0.8	0.5	0.5	0.1	0.4	0	6.9	1.8	0	0	0	0.2	1.6	2.2	1.7	3.4	0.9	6	2.1	0	0	0.2
2003-01-21	1.4	6.2	0.7	2.3	10	1.3	1.8	10.3	3.9	42.5	13.7	30.3	15	3.7	11	17.5	30.3	14.6	15.6	5.3	17.9	31.4	20.6	20.6	15	8.4	2.5	1.5	29.6	9.4	23	0.9	0.7	7.3	0.1	1.5	0.5	2.3	0.2	0.4	9.2	1.8	1.8	2.9	0.4	0.1	11	5.3	31.4
2003-01-22	5.6	1.9	12.7	0.3	0	0.3	4.3	0	0	9.5	32.2	0.3	0.9	14.9	0.6	0.7	0.3	4.6	0	0.5	0.3	1.3	3.7	3.7	0.9	2.7	12.9	5.7	18.8	3.6	2.7	2.1	1.6	5.4	5	12	10.6	9.1	0	0	1.3	0.2	0.4	4.4	0	0	0.6	0.5	1.3
2003-01-23	0.1	0.2	0	0	0.9	0	0	0	1.3	2	11.8	0	0.5	0	0	0.1	0	0.7	0	0	1.4	0	0.3	0.3	0.5	1.7	6.3	5	9.6	4.1	2.4	0.9	0.5	1	1.2	0	0.2	0.3	0.4	0	5.8	2.7	1.8	9.2	0	3.4	0	0	0
2003-01-24	88	10.3	135.9	81.8	0	0	0.8	0	0	0	19.3	0	0.1	0.4	0	0	0	0.1	0	0	9.3	0	0	0	0.1	1	0.8	0.9	10.1	3.1	3.9	1	2.9	14.6	4.8	1.8	0.5	0.5	9.2	7.9	11.1	2.1	0.6	7.7	8.2	0.3	0	0	0
2003-01-25	4.3	40.8	6.2	11.2	0	0	0.6	0	0	0	0	0	2.4	3.9	0	5.4	0	18.9	0	0	4.6	1	0.7	0.7	2.4	0.3	7	9.3	4.1	0.1	1.7	7.4	9.8	0	0.7	14.3	6.7	0.2	3.5	9.9	1.9	8	0	13.6	0.3	18.6	0	0	1
2003-01-26	29.8	3.4	22.6	23.5	0	0	0.1	0.5	0	3.9	13	0.2	0.4	0.3	0	1	0.2	0.1	0.6	0.4	0	0.1	1.8	1.8	0.4	0.1	4.4	9.1	10.1	11.1	4.3	6	2.8	6.6	5.2	6.7	5.4	1.5	2.4	0.2	18.6	24	4.2	0.3	10.7	12.4	0	0.4	0.1
2003-01-27	2.1	16.6	11.1	1	0.7	2.1	0.7	0.1	0	10.6	0.6	0	0	0.3	0	0	0	0.5	0	0	0	0	0	0	0	0	0.6	2.9	2.9	25.4	20.2	17.7	11.8	24.2	9.5	15.2	10	8.9	0.6	5.4	16.4	26.9	0.4	3	2.7	0.8	0	0	0
2003-01-28	0	0	0	0	0.3	1.9	0	3.3	0.1	0	0.1	1.4	0.5	0	0.3	1	1.4	0	0.2	0.1	7.4	2.2	1.6	1.6	0.5	0	4	43.2	18.2	53.3	75.5	90.1	14.2	32.5	2.3	1.8	1.2	0.7	3.7	1.9	27.1	8.9	2.6	0.3	0.8	2.5	0.3	0.1	2.2
2003-01-29	0	0	0	2.7	0	0	1.9	0.5	0	0.4	5.5	0.7	4.9	5.3	0.2	3.1	0.7	7.3	1.8	0.1	0	0.5	0.8	0.8	4.9	6.7	2	11.4	27.6	2	6.1	5.1	8.1	2.5	1.2	8.7	10.6	8.4	9.7	0.6	4.4	5.9	0	1.8	7.5	0.4	0.2	0.1	0.5
2003-01-30	0.9	5.1	4.9	8.6	0	0	1.2	0	0	0.8	0.3	0	0.2	0.1	0	0	0	0	0	0	0.1	0	0	0	0.2	0.5	2.3	13.8	1.1	0.9	1	0.6	1.6	1.4	0.7	0	0.1	0.6	9	16.5	2.3	2.1	1	4.4	24.1	2.7	0	0	0
2003-01-31	2.8	0.8	0.7	4.5	13.2	0	1.2	2.9	28.3	65.2	30.1	3	33.7	4.1	18.3	21.8	3	8.5	39.4	18.9	6.1	2.6	18.3	18.3	33.7	29.5	4.8	31.8	10.6	1	2.2	42.4	22.3	0.5	1.3	1.5	4.8	4.7	6	4.7	0.9	3.5	4.6	9	0.1	0	18.3	18.9	2.6
2003-02-01	18.1	6.9	15	27.7	0.8	1.1	1.9	0.6	0.8	5.4	1.4	0.7	3.6	0.2	0.4	7.7	0.7	3.4	1.2	0.7	3.6	1.6	3	3	3.6	2.5	13.4	81.8	29.9	42.3	31.7	106.1	27.6	7.3	1	0.4	1.3	4.2	1.7	4.2	35.2	1	22.5	8.8	0	1.2	0.4	0.7	1.6
2003-02-02	7.4	1.2	2.9	11.7	0	0	21.8	0	1.1	0	7	0.2	5.9	9.2	0	5	0.2	10.7	0	0	3	0.3	0.2	0.2	5.9	5.1	16.4	24.9	15.7	13.3	16.2	38.6	28.4	9.1	3.1	57.2	79	71.5	7.9	2	16.4	9.4	5.7	3.1	0.3	0	0	0	0.3
2003-02-03	0	0	0	0	2	1.6	1.4	0.1	11.6	0	4.3	0.3	3.7	7.8	2.8	2.2	0.3	6.4	7.3	1.5	5.4	0.3	0.8	0.8	3.7	4.7	2	10	10.1	7.7	11.2	18.7	1	7	0	3.9	4.1	3.3	4.3	1.1	6.9	4.6	0.7	3.1	3.9	2	2.8	1.5	0.3
2003-02-04	1.8	0.8	0	0.2	4.5	0.4	8.6	2.2	3.7	11.7	6.3	7.7	17.4	29.9	2.8	17.9	7.7	9.7	3.3	2.2	32.5	14.3	26.1	26.1	17.4	19.8	17.7	43.8	13.7	3.8	9.3	43.4	52.3	6.5	0.5	0	4.2	3.1	0	0.2	11.1	3.8	7.2	1	0	5.8	2.8	2.2	14.3
2003-02-05	25.5	11.3	10.2	2	1.2	0.3	12.1	0.2	0.1	2.8	1.7	0.2	2.8	4.3	0.2	3.2	0.2	1.9	0.7	0.1	0.5	0.5	2.5	2.5	2.8	1	1	10.3	7.8	10.7	9	15.9	0.6	4.1	0.8	0	2	0	0.2	0	11.9	0.4	0.1	0.7	14	16.6	0.2	0.1	0.5
2003-02-06	0	0	1.1	0	1.1	0.2	0	0.1	0	0.4	5.6	0.4	0.6	3.2	0.6	2.1	0.4	2.5	1.7	0	4.4	3.1	2	2	0.6	0.6	3.3	2.4	4.9	4.4	5.3	4.3	3.1	1.7	1.2	0.2	2.6	3.2	3.1	8.9	1.1	3.7	1.3	0.9	0.5	3.3	0.6	0	3.1
2003-02-07	0	4.4	0	0	6.1	8.1	0.9	0.7	0	0	1.4	4.3	1.8	3.4	0.5	0.4	4.3	0	3.8	5.7	0	0.5	3.6	3.6	1.8	0.2	2.8	0	4.1	1.2	1.1	0.2	3.3	3.3	0.2	8.3	5	3.7	2.2	6.9	5.7	1.3	6.6	2	0	0	0.5	5.7	0.5
2003-02-08	3.6	0	0	0.3	14.5	27.9	0	0.7	5.8	0	0	0	0	0.7	0	0.1	0	0.9	1.7	0	3	0	0	0	0	0.2	0.5	12	14.1	2	8	13.8	16.1	34.7	26.9	8.1	3.3	7.9	0.6	5.7	1.8	9.4	0	0.3	2.4	10.9	0	0	0
2003-02-09	0.4	0.7	0	0	1.2	28.9	0	0	8.7	0	0.1	0	0.1	1.2	0	0	0	0.6	4.9	0	7.4	0.9	5.9	5.9	0.1	3.1	2.7	2.5	0.2	0.8	0	2	37.7	6.9	0.7	0.8	0.6	0.3	0	0	0.4	0	6.1	9.4	1.2	3.1	0	0	0.9
2003-02-10	0	2.3	0	0	8.7	27.5	3.5	9	0	5.7	1.4	5.2	0.7	0.8	6.6	0.7	5.2	0.3	4.5	6.2	2.3	9.9	1.6	1.6	0.7	0.2	10	11.3	0.8	3.1	1.5	24.8	45.7	3.7	21.4	14	2.8	25	0.4	0.6	8.4	13.9	1.9	0.2	0	0	6.6	6.2	9.9
2003-02-11	7.2	2.9	0.3	0	0.3	1	1.9	0.5	1.5	0	0.3	0.8	0	0.1	1	0	0.8	0	6.7	0	2.7	1.2	0.2	0.2	0	0	3.4	2.9	7.1	8	13.8	1.3	14.5	7	11.9	28.1	25.1	15.5	1.1	1.1	10.4	0.4	0	12.3	0	0	1	0	1.2
2003-02-12	1.2	0	0.3	0.3	2.2	0	0	0.2	1.8	0	0	0.2	0	0.1	0	0	0.2	0	0	0	0	0	0	0	0	0	0	1.6	0.5	9.8	10.7	0.2	7.6	25.6	6.3	3.2	5.7	11.1	2.4	13.9	7.8	0.6	1.1	2.3	0	0.3	0	0	0
2003-02-13	1.9	16.3	2.3	32.3	0	0.1	0	0	0	0	0	0	0	0	0	0	0	0	0	0	0	0	0	0	0	0	0	0.9	0	5.3	23.2	6	20.1	4.9	28.5	8.6	6	4.9	7	12.8	0	0	0	1.9	0	0.8	0	0	0
2003-02-14	1.6	1.4	0	1.7	0.7	0	0	0	0	5.2	0	0	0	0	0	0	0	0	0	0	0	0	0	0	0	0	0	0	0	0	0	0	1.1	0	0	3.9	0.3	0.3	1	1.2	0	3.7	1.9	0.1	19.9	20.9	0	0	0
2003-02-15	0.1	3.5	0	2.6	0	0	5.2	0	0	20.1	10.1	0	0.1	0.8	0.1	0	0	0.6	0	0	0.7	1.6	1.3	1.3	0.1	2.4	0	0	0.9	13.7	4.2	0.1	0.5	1.9	1.2	0	0	1	3.5	6.2	0.6	52.2	14.4	0.2	2.3	14.9	0.1	0	1.6
2003-02-16	0	8.2	0.1	0	0	0	0.1	0.6	0	0	1.4	0.2	2.7	0	0.7	0.1	0.2	1.2	0	0.2	0.1	2.8	6.7	6.7	2.7	1.6	0.5	0.1	4.1	0.3	2.4	0.3	4.5	0	0	0	0	0.1	7.7	6.6	0	18.7	0	0	30.7	0.9	0.7	0.2	2.8
2003-02-17	11.8	11.4	5.4	3.6	0	1.1	2.5	0	0	0	1	0	0.2	0	0	0.4	0	2.3	0	0	0	0	0	0	0.2	0	16.9	51.8	33.2	20.3	24.2	43.8	5.9	5	4.4	6.3	23.9	24.5	21.2	33.7	52.7	26.7	23.8	0	20.1	2	0	0	0
2003-02-18	6.6	3.6	0	4	0	0	0.1	0	0	0	1.1	0	0	1.2	0	0	0	0	0	0	0	0	0	0	0	0	2.2	7.5	15.2	6.3	5.5	2.4	0.7	6.5	3.6	6.2	1.9	0.3	1.5	2.8	1.8	4.8	8.2	2.2	2.2	0	0	0	0
2003-02-19	0	1.2	0	0	0	0.1	0	0	0	0	1.2	0	0	1.7	0	0	0	0.1	0	0	0.3	0	0	0	0	0.2	4.7	1.7	36.8	3.3	14.6	2.9	2.5	19.6	4.3	8.7	5.8	1.5	0.3	2.2	7.9	0	0.9	0.2	1.6	0	0	0	0
2003-02-20	0	0	0	0	0	0	0	0.3	0	1.4	4.2	0	0.2	0.7	0	0.5	0	0.7	0	0	2	0.2	0.2	0.2	0.2	0.4	0.2	0.8	5.8	0.2	0.6	2.1	3.7	0.5	3.4	9.5	10.2	6.6	0.6	0.7	0	0	3.7	0.6	0.9	0	0	0	0.2
2003-02-21	7.3	3.1	34.1	2.4	9	3.4	22.6	36.7	6.8	6.1	10.5	29.6	4	2.8	36.4	6.2	29.6	4.5	14.5	61.1	33	17.4	12.1	12.1	4	5.9	0.2	0.7	20.9	8.9	18	1.5	0.5	15.2	4.7	11.1	16.3	3.9	0.3	0.5	2.8	0	1.9	1	4.6	4.7	36.4	61.1	17.4
2003-02-22	16.5	28.2	1.4	6.7	39.7	9.1	26.6	17.3	78.4	92	0.4	13.4	1.1	1.6	31.5	4.1	13.4	0.8	38.2	51.3	11.9	14.1	4.1	4.1	1.1	1.6	3.2	0.9	0	0.3	0.2	0.9	0.2	0.3	1.3	0.6	0.3	1.2	0	0	0.4	3.4	0	0.2	91.7	10.4	31.5	51.3	14.1
2003-02-23	24.1	16.8	10	33.6	31.2	75.9	1.4	30.6	10.3	18.9	4.4	28.4	13.3	7.3	29.9	15.3	28.4	8.2	22.2	34.3	21.3	24.1	20	20	13.3	14.3	0.2	0	1.4	0.2	0	0	0	0	0	0.3	0.1	0.2	1.2	0.5	0.5	0	2.3	3.5	2.8	20	29.9	34.3	24.1
2003-02-24	7.8	50.7	17.7	26.5	5	0.3	120.3	20.9	0.7	26.6	6.2	16.1	2.1	13.3	7.9	8.5	16.1	7.9	8.8	9.3	0.2	9	3.6	3.6	2.1	3.8	0.7	0.1	4.2	6.8	8.7	0	0	1.5	0	0	0.1	0.1	0.1	0	3.1	0	0	0.7	0	0	7.9	9.3	9
2003-02-25	28.2	28.3	4.3	10.8	1.3	0.6	6.3	1.2	0	8	5	0.8	0.7	0.2	0	4.9	0.8	0.4	0.3	0	0.6	2.8	2.8	2.8	0.7	1.6	8.5	1	31.5	21.7	8.5	0.4	0	1.5	0.1	0	0	0	0	0	2.3	0	2	0.3	0	0	0	0	2.8
2003-02-26	17.9	23.8	0	15.7	0.1	5.4	7	4.1	0.3	0	0	1.9	4	0.5	1	6.4	1.9	6.2	0	0	7.7	1.4	2.3	2.3	4	5	0	0	0.2	9.3	2.7	0.3	0	0	0	0	0	0	0	0	12	0	4.3	5.2	0	0	1	0	1.4
2003-02-27	1.5	28.2	0	1.7	0	0.2	4.1	0	0	1.1	0.8	0	0.4	0.2	0	0.1	0	2.4	0	0	0	0	0	0	0.4	0.6	0.1	0	0.5	0.5	0.1	0.1	0	0	0.2	0	0	0	0	0.3	2.7	11.7	0.1	0	2.1	0	0	0	0
2003-02-28	0	0	0	0	0	0	0	0	0	23.4	0	0	0	0	0	0	0	0.2	0	0	0	0	0	0	0	0	0.5	0	0.7	0.3	4.4	0	0	0	0.2	0	0	0	0	0	0	0.5	9.8	0.1	0	1.9	0	0	0
2003-03-01	6.4	4	4.3	1.3	0	0.2	0	0	0	1	8.3	0	1.8	11.2	0	1	0	5.5	0	0	6.9	0.4	1.1	1.1	1.8	2.3	0.1	0	2	0	0	0	0	0	0.1	0	0	0	0	0	0.3	4.9	0	8.1	8.3	4.4	0	0	0.4
2003-03-02	0	0.9	0	0.2	1	1.5	5.8	1.7	0	0.5	6.8	0.9	0.2	0.4	0.1	0.1	0.9	0.1	0	0	1.2	1.3	2.7	2.7	0.2	0.3	4.9	0.4	4.2	0.2	2.3	0	0	1.5	0.1	0	0	0	0.1	0	1.8	45.8	0.2	0.9	0	2.3	0.1	0	1.3
2003-03-03	0	0	0.9	0	0	3.8	0.3	0.1	0	14.9	0.1	0.4	6.9	0	0	3.9	0.4	5.2	0	0	0.7	0.8	2.2	2.2	6.9	4	9.5	0.1	0.2	3.5	13.1	0.2	0	1	2.4	0	0	0.2	0	0.5	0	9.5	6.2	3.9	0	0.2	0	0	0.8
2003-03-04	0.3	2.2	0.3	7.9	24.3	0.1	10.1	8.2	28.3	16	0.2	3.5	23.6	0.9	1.3	57.5	3.5	26.7	1.2	0.4	5.5	3	1.2	1.2	23.6	0.7	3.6	0.4	5.5	17.2	29.8	0.6	0	2.9	0.8	0	12.6	3.9	0	0.1	6.6	0.7	11.4	0.9	0	0.3	1.3	0.4	3
2003-03-05	4.4	22	1.4	10.1	8.1	1.9	0	1.1	67.7	0	0.1	0.4	0.1	2.1	0.4	10.7	0.4	31.3	8	0.2	2.3	0.4	0.5	0.5	0.1	0	4.9	4.6	7.3	0	0	3.6	0	0	0	0.3	0.5	2.4	0	0	0	0.8	1.3	1.2	0	0	0.4	0.2	0.4
2003-03-06	4.5	17.5	20.8	10.5	56.8	3.8	1.6	7.8	79.3	37.6	12.7	27	6.2	24.2	47.5	6.5	27	9.5	13.8	56.8	7.9	20.8	14.3	14.3	6.2	8.7	1.5	9.2	19	37.2	25.3	3.2	0.9	3.1	1.7	0	0.9	0	0	0	7.4	1.3	0.1	0.1	0	0	47.5	56.8	20.8
2003-03-07	72.6	17.6	1	51	36.5	58.3	8.1	35.1	26.6	0.8	22.6	35.8	36.8	7.9	45	58.8	35.8	9.5	60.6	44.5	25.8	40.3	25.2	25.2	36.8	14.2	2.7	17.5	5.8	29.2	33	12.6	2.2	62.6	4.3	0	0.4	0.3	0.2	3.6	30.3	0	4.3	1.7	0	0	45	44.5	40.3
2003-03-08	15.9	8.3	19.3	7.9	2	55.5	16.6	3.6	7	10.4	19.4	3.5	0.3	2.1	4.6	1.8	3.5	9.7	2.6	3.8	6.7	2.8	0.8	0.8	0.3	1	15	17.1	2.9	2.6	14.6	19.1	1.8	25.3	0.6	2	1.5	3.1	0.1	0	6.4	0	2	4.9	0.3	0	4.6	3.8	2.8
2003-03-09	21.8	24.8	24.5	24.5	0.1	1.3	14.6	11.3	0	2.9	13.3	12.6	25.2	13.3	0.1	27.6	12.6	17.2	0	2	10.1	14.9	19	19	25.2	23.7	17.7	9.3	5.7	0.1	0.8	5.4	34.4	1.9	2.5	18.9	4.2	0	8.1	6.3	4.9	0	1.3	0.8	0	0	0.1	2	14.9
2003-03-10	23.6	7	12.3	18.2	0	0.1	9.4	0	0	0	1.8	0	0	0	0	0	0	0	0	0	0	0	0	0	0	0	16.6	2.2	18.7	1.3	0.8	2.7	1.6	27.8	14.7	26.2	11.2	2	11	9.4	20.4	0	0.2	0	0	0	0	0	0
2003-03-11	20.7	23.5	4.2	15.5	0	0	0	0	0	0	0	0	0	0	0	0	0	0	0	0	0	0	0	0	0	0	0	0.2	0	0	0	0.2	0.8	0.2	0.1	32.3	6.6	0.6	2.1	0	0	0	0.9	0.4	0	0	0	0	0
2003-03-12	0	2.3	0	0	0	0.2	0	0	0	0	0	0	0	0	0	0	0	0	0	0	0	0	0	0	0	0	0	0	0	0	0	0.5	0	0	1.5	58	12.1	0.2	2.8	1.8	0	0	2	3.7	0	0.1	0	0	0
2003-03-13	0	0.1	0	0	0	0	0	0	0	0	0	0	0	0	0	0	0	0	0	0	0	0	0	0	0	0	0	0	0	0	0	0.7	1.4	0.1	0	22.1	2.3	0	1.2	0.1	0	0	0	2.4	0	0	0	0	0
2003-03-14	0	0	0	0	0	0	0	0	0	0	0	0	0	0	0	0	0	0	0	0	0	0	0	0	0	0	0	0.6	3.6	20.3	19.8	0.9	0	14.2	24.7	0.2	0.1	5.3	0.2	0	7.4	0.6	0	15.6	0	0	0	0	0
2003-03-15	0	0	0	0	0	0	0	0	0	0	6.7	0	1	0.8	0	0.1	0	3.5	0	0	0	0	0	0	1	0.3	3.6	0.5	24	45.4	45.9	3.5	13.9	50.3	4.6	0	0	0	0	0.7	5	0	0	9	0	0	0	0	0
2003-03-16	0	0	0	0	0	0	0	0	0	0	37.8	0	0.2	24.2	0	0	0	1.3	0	0	0	0	0	0	0.2	0.5	10.8	11.1	37.1	14.7	72.4	1.7	10.7	44	46.1	24.7	10.1	10.2	6.9	1	7.5	0	1.5	3	0	0	0	0	0
2003-03-17	0	0	0	0	0	0	0	0	7.6	0	31.4	0	0.9	11.6	0	0	0	7	0.5	0	0.1	0	2.8	2.8	0.9	4.5	22.1	17.9	2.8	7.2	3.2	5.9	6.7	6.1	4.3	1.7	0.7	0.5	9.9	4.6	3.8	0	0.1	3.8	0	0	0	0	0
2003-03-18	0	0	0	0	0	1	0	0	0	0.4	14.3	0.2	1	2.4	0	1.4	0.2	10.2	0	0	5.9	0.8	8.6	8.6	1	0	21.3	0.7	1.3	17.1	0.2	1.2	23.1	1.8	6.7	15.1	1.8	0.3	0.9	0.5	4.6	0	0	0	0	0	0	0	0.8
2003-03-19	0	0	0	0	0	0.3	0.5	2.2	0.3	0	45.6	0.2	0.6	23	0.2	13.7	0.2	39.7	1.1	0	21.5	1.5	1.2	1.2	0.6	2.3	1.2	0	20.9	18.4	21.8	3	2.3	2.5	5.1	2.9	0	0	0.7	0	6.8	0	0	2	0	0	0.2	0	1.5
2003-03-20	0	0	0	0	6.8	0.1	15.3	8.8	0.7	0	0.2	4.9	12	26.6	0.3	8.5	4.9	18	0	0.9	14.3	4.5	5.8	5.8	12	5.1	10.6	3.6	3.1	6	10.5	14.8	2.1	0.7	10.4	21.4	1.8	0.5	0.1	0	10.1	0	12.4	4.7	0	0	0.3	0.9	4.5
2003-03-21	0	23.9	15.5	4.5	0	3.6	0.2	0	0	0	0.7	0	13.9	2.3	0	1.6	0	6.5	0	0	0	0.1	1.4	1.4	13.9	9	2.3	3.6	2.8	16.7	13.7	3.2	0.6	19.7	0.6	0	0	0.1	5.9	3.2	13.8	0	1.4	0.7	0	0	0	0	0.1
2003-03-22	0	0	0	0	0	1.2	0	0	0	0	3	0	1.7	9.5	0	0	0	0	0	0	1.9	0	0.6	0.6	1.7	8.3	13.8	0.2	11.5	15.2	32.9	0.4	0.1	6.2	11.5	11.9	4.3	0.6	3.9	0.2	0.2	0.1	8.5	0.5	0	0	0	0	0
2003-03-23	1.8	6	6.4	0.2	0	0	36.9	0	0	49.1	0.5	0	0	0.9	0.1	0	0	1.8	0	0	1.2	0.3	0	0	0	0	0.2	0.2	6.5	21.5	23.2	0.3	1.4	1.7	3.2	25.2	9.6	3.7	11.2	15.9	5.2	0	0	1.7	9.1	0	0.1	0	0.3
2003-03-24	13.9	0.2	6	6.5	9.5	4.4	0	0.3	21.5	18.8	0	1.2	1.6	5.7	3.5	5.9	1.2	0.5	7.8	9.3	15.8	0	0.4	0.4	1.6	1.2	0	2.9	0.3	0.1	0	2.9	2	2.2	16.5	10.3	7.8	4.6	5.9	0	1.8	0	0	0.8	88.3	79.9	3.5	9.3	0
2003-03-25	8.5	15.8	25	4.4	81.9	1.4	4.1	12.4	32.1	27.2	15.9	5.1	3.2	19.9	68.7	11.9	5.1	25	39.4	65.9	16.4	3.7	1.9	1.9	3.2	5.1	10.7	52.4	1.8	0.9	4.4	35.7	12.9	41.8	5.3	1.1	0.2	2.3	3.2	0.1	19	0	6.9	0.1	0.9	0.1	68.7	65.9	3.7
2003-03-26	8.1	6.6	0.3	0	62.8	0.6	43	12.7	10.6	9.1	32.6	8.6	12.4	20.3	11.8	15.6	8.6	22.3	14.2	21.9	1.5	3.2	10.9	10.9	12.4	14.4	27.2	23.5	24.2	12.8	13.1	13.3	1.6	1.7	0.1	4.3	6	2	12.5	5.1	12.1	0.1	0	0.2	0	0	11.8	21.9	3.2
2003-03-27	14.6	12	5.6	33.5	11.4	11.4	6	22.3	13.5	37	15.2	14.3	15.5	7.6	13.8	25	14.3	17.5	18.7	22.7	0.5	9.3	7.9	7.9	15.5	8.4	30.1	24.5	17.6	16.3	4.2	36.5	53	12.8	2.3	6.7	3.2	0.9	4.1	4.9	23.1	0	0	0	0	0	13.8	22.7	9.3
2003-03-28	0.5	0.3	0.2	0.1	1	41.7	7.9	3.1	2.6	0	2.2	3.4	1.9	0.5	2.7	4.2	3.4	1.6	4.4	2.3	1.2	6.8	4.5	4.5	1.9	4.4	5.2	3	6.3	1	9.4	11.1	23.3	0	2.3	83.5	38.3	11	14.6	4.8	2.4	0	0.3	0	0.1	0	2.7	2.3	6.8
2003-03-29	0	1.6	0	2	13.5	64.3	2.2	1.2	13.1	0	0.9	1	2.7	2.2	2.5	3	1	2.4	1.7	0.8	2.7	1.9	2	2	2.7	4.3	1.9	3.3	1.6	2.9	0.5	20	16.2	0.4	3.5	20.5	4.1	3.5	14.9	0.7	12.2	1	14.4	27.1	0	0	2.5	0.8	1.9
2003-03-30	0	0	0	0	8.4	11.6	0	3.4	0.5	0	0.4	4.3	0.8	0.3	0	1.5	4.3	1	0.4	0	1.4	3.1	0.9	0.9	0.8	0.2	2.7	5.2	0.7	6.1	5.2	6.5	11.7	0	0.1	18.7	6.3	14.5	22.4	1.4	8.4	0	0.7	30.2	0.2	1.3	0	0	3.1
2003-03-31	0	0	0	0	0	0	1.2	0	0	0	7.4	0.8	0.2	0.2	0	1.5	0.8	6.3	0	0	0.2	2.1	0.2	0.2	0.2	0.2	4	0	0.1	2.4	0.3	3.6	10.7	0.1	0.7	28.4	8.4	0.3	13.4	2.1	0.1	5.6	0.6	25	0	0	0	0	2.1
2003-04-01	0	0	0	0	0.9	0	12.1	0	10	0	0.9	0	24.1	0.8	0	14.9	0	1.4	3.3	0	0.5	0	12.2	12.2	24.1	7	5.5	1.5	0	0	0	1.9	0.8	0.6	1.7	5.9	12.3	13	50.9	9.5	0	0.1	0	10.4	6.8	10.8	0	0	0
2003-04-02	0	0	0	0	1.1	1.8	1.1	0.3	0.4	0	21	0.2	10.7	0	0	6	0.2	0.4	0	0	0	0	1.7	1.7	10.7	1.6	1.3	0	1.6	3.6	5.5	16.3	0.9	0	10.2	17.6	15.9	4.2	28.4	3.2	1.2	1	0	2.2	0.6	12.6	0	0	0
2003-04-03	0	0	0	0	0	0.8	51.1	0	0	0	0	0	1	0	0	0	0	0	0	0	0	0	0.7	0.7	1	0.4	0	0	0.2	0	0	9.4	8.7	0	6.3	8	5.4	0.1	6.4	0.5	1.1	10.1	2.7	6.1	9.3	21.5	0	0	0
2003-04-04	0	0	0	0	2.2	1.1	0	9.6	1.8	0	12.2	1.5	1.5	0.8	0.5	0.5	1.5	0.7	2.1	0.5	0	0.1	0	0	1.5	0.8	0.1	0	0	2.3	9.2	2.8	0	0	5.6	4.2	0.5	0.2	19.8	23	24	17.8	12.8	10.5	28	4.8	0.5	0.5	0.1
2003-04-05	0	0	0	0	0	7.3	0	0	0.1	0	0	0	0	0	0	0	0	0	0.8	0	0	0	0	0	0	0	0	0	0	0	0	0	0	0	14.3	27.7	16.9	15.4	7.9	11.2	0	1.2	8.1	0.4	0	0	0	0	0
2003-04-06	0	0.1	0	0	0	15.8	0	0	0	0	0	0	0	0.2	0	0	0	0	0	0	0	0	0	0	0	0	0.1	0	0	0	0	0	0	0	0	0	0.7	0	5.9	3.8	0	0	0	1.8	0	0	0	0	0
2003-04-07	0	0	0	0	0	0	0	0	0	0	0	0	0	0	0	0	0	0	0	0	0	0	0	0	0	0	0	0	0	0	0	0	0	0	0	0	0	0	2.4	0.2	0	0	0.1	0	0	0	0	0	0
2003-04-08	0	0	0	0	0	0.9	0	0	0	0	0	0	0	0	0	0	0	0	0	0	0	0	0	0	0	0	0.1	0	0	0	0	0	0	0	1.6	0	0.1	0	0	0	0	0	4.2	4.8	0	0	0	0	0
2003-04-09	0	0	0	0	0	0	0	0	0	0	0	0	0	0	0	0	0	0	0	0	0	0	0	0	0	0	0.1	0	0	0	0	0	0	0	0.2	1.4	1	0	0	0	0	0	0	0	0	0	0	0	0
2003-04-10	0	0	0	0	0	2	0	0	0	0	0	0	0	0	0	0	0	0	0	0	0.7	0	0	0	0	0	0	0	0	0	0.1	1.3	0	0.4	0	1.6	13.3	8.2	5.3	8.4	0	0	1.3	0.4	0	0	0	0	0
2003-04-11	0	0	0	0	0	3.5	0	0	0	0.2	0	0	0.3	0.8	0	0.4	0	0.2	0.3	0	0	0	0	0	0.3	0.1	0	0	0	0.9	1.5	2.5	0.1	0	0.3	4.6	0.6	0	29.5	15.8	0	0.3	0.7	5.6	0	0	0	0	0
2003-04-12	0	0	0	0	0	0	0	0	0	0	0	0	0	0	0	0	0	0	0	0	0	0	0	0	0	0	0.1	0.9	0	0	0	0	0	0	0.1	2.1	3	0.3	7.8	0	0	9.6	3.4	0	0	0	0	0	0
2003-04-13	0	0	0	0	0	0	0	0	0	0	0	0	0	0	0	0	0	0	0	0	0	0	0	0	0	0	0.1	0	0	0	0	0	0	0	0	0	0.5	0	0.4	0	0	16.8	0	0.5	0	0	0	0	0
2003-04-14	0	0	0	0	0	0.9	0	0	0	0	0	0	0	0	0	0	0	0	0	0	0	0	0	0	0	0	0.4	0	0	0	0	0.2	0	0	0	1.4	0	0	0	0	0	1.4	13.4	0	0	0	0	0	0
2003-04-15	0	0	0	0	0	4.9	0	0	0	0	0	0	0	0	0	0	0	0	0	0	0	0	0	0	0	0	0	1.3	0	0	0	6.3	0	0	0	0	0	0	0.9	0	0	3.2	6.6	0	0	0	0	0	0
2003-04-16	0	0	0	0	0	0.2	0	0	0	0	0	0	0	0	0	0	0	0	0	0	0	0	0	0	0	0	0	0	0	0	0	0	0	0	0	0	0	0	0.2	0	0	0	0	0	0	0	0	0	0
2003-04-17	0	0	0	0	0	0.4	0	0	0	0	0	0	0	0	0	0	0	0	0	0	0	0	0	0	0	0	0	0	0	0	0	0	0	0	0	0	0	0	0	0	0	0	0	0	0	0	0	0	0
2003-04-18	0	0	0	0	0	1.4	0	0	0	0	0	0	0	0	0	0	0	0	0	0	0	0	0	0	0	0	0.5	0	0	0	0	7.1	0	0	0	0	0	0	0	0	0	0	0	0	0	0	0	0	0
2003-04-19	0	0	0	0	0.2	1.5	0	0	0	0	0	0	0	0	0	0	0	0	0	0	0	0	0	0	0	0	0	0	0	0	0	0	0	0	0	0	0	0	0	0	0	0	0	0	0	0	0	0	0
2003-04-20	0	0	0	0	0	0	0	0	0	0	0	0	0	0	0	0	0	0	0	0	0	0	0	0	0	0	0	0	0	0	0	0	0	0	0	0	0	0.8	0	0	0	0	0	0	0	0	0	0	0
2003-04-21	0	0	0	0	0	0	0	0	0	0	0	0	0	0	0	0	0	0	0	0	0	0	0	0	0	0	0	0	0	0	0	0.4	0	0	0	0	0	0	0	0	0	0	0	0	0	0	0	0	0
2003-04-22	0	0	0	0	0	0	0	0	0	0	0	0	0	0	0	0	0	0	0	0	0	0	0	0	0	0	2.1	0	0	0	0	0	0	0	0	0	0	0	0	0	0	0	0	0	0	0	0	0	0
2003-04-23	0	0	0	0	0	1.6	0	0	0	0	0	0	0	0	0	0	0	0	0	0	0	0	0	0	0	0	0	0	0	0	0	0	0	0	2.7	3	0	0.1	18	4.3	0	0	0	0	0	0	0	0	0
2003-04-24	0	0	0	0	0	11.6	0	0	0	0	0	0	0	0	0	0	0	0	0	0	0	0	0	0	0	0	0	0	0	0	0	1.9	0	0	2.2	0	0	1.3	2.4	1.8	0	0	0	0	0	0	0	0	0
2003-04-25	0	0	0	0	0	0	0	0	0	0	0	0	0	0	0	0	0	0	0	0	0	0	0	0	0	0	0	1.1	0	0	0	0.9	0	0	0	0	0	0	0	0	0	0	0	0	0	0	0	0	0
2003-04-26	0	0	0	0	0	7.2	0	0	0	0	0	0	0	0	0	0	0	0	0	0	0	0	0	0	0	0	0	0	0	0	0	0	0	0	0	0	0	0	0	0	0	0	0	0	0	0	0	0	0
2003-04-27	0	0	0	0	0	0.3	0	0	0	0	0	0	0	0	0	0	0	0	0	0	0	0	0	0	0	0	0	0	0	0	0	0	0	0	0	0	0	0	0	0	0	0	0	0	0	0	0	0	0
2003-04-28	0	0	0	0	0	0.2	0	0	0	0	0	0	0	0	0	0	0	0	0	0	0	0	0	0	0	0	0	5.1	0	0	0	0	0	0	0	0	0	0	2.5	0	0	0	0	0	0	0	0	0	0
2003-04-29	0	0	0	0	0	0	0	0	0	0	0	0	0	0	0	0	0	0	0	0	0	0	0	0	0	0	0	5.3	0	0	0	0	0	0	0	0.5	0.4	0	0	0	0	0	0	0	0	0	0	0	0
2003-04-30	0	0	0	0	0	0	0	0	0	0	0	0	0	0	0	0	0	0	0	0	0	0	0	0	0	0	0	1.2	0	0	0	0.9	0	0	0	0	0	0	0	0	0	0	0	0	0	0	0	0	0
2003-05-01	0	0	0	0	0	13.6	0	0	0	0	0	0	0	0	0	0	0	0	0	0	0	0	0	0	0	0	0.3	2.6	0	0	0	1.2	0	0	0	0	0	0	0	0	0	0	0	0	0	0	0	0	0
2003-05-02	0	0	0	0	0	0.4	0	0	0	0	0	0	0	0	0	0	0	0	0	0	0	0	0	0	0	0	1.9	0.9	0	0	0	2.5	0	0	0	0	0	0	3.6	0	0	0	0	0	0	0	0	0	0
2003-05-03	0	0	0	0	0	0	0	0	0	0	0	0	0	0	0	0	0	0	0	0	0	0	0.1	0.1	0	0.1	1.3	0	0	0	0	0	0	0	0	0	0	0	0	0	0	0	0	0	0	0	0	0	0
2003-05-04	0	0	0	0	0	0	0	0	0	0	0	0	0	0	0	0	0	0	0	0	0	0	0	0	0	0	0	0	0	0	0	0	0	0	0	3.7	0	0	0	0	0	0	0	0	0	0	0	0	0
2003-05-05	0	0	0	0	0	0	0	0	0	0	0	0	0	0	0	0	0	0	0	0	0	0	0	0	0	0	0	0	0	0	0	0	0	0	0	0	0	0	0	0	0	0	0	0	0	0	0	0	0
2003-05-06	0	0	0	0	0	0	0	0	0	0	0	0	0	0	0	0	0	0	0	0	0	0	0	0	0	0	2.6	0	0	0	0	3	0	0	0	0	0	0	2.9	0	0	0	0	0	0	0	0	0	0
2003-05-07	0	0	0	0	0	1	0	0	0	0	0	0	0	0	0	0	0	0	0	0	0	0	0	0	0	0	1.4	0	0	0	0	0	0	0	0	0	0	0	1.4	0	0	0	0	0	0	0	0	0	0
2003-05-08	0	0	0	0	0	2	0	0	0	0	0	0	0	0.9	0	0	0	0	0	0	0	0	0	0	0	0	0.5	0	0	0	0	0	0	0	0	0	0.6	0	0	0	0	0	0	0	0	0	0	0	0
2003-05-09	0	0	0	0	0	13.8	0	0	0	0	0	0	0.4	7.9	0	0	0	0	0	0	0	0	0	0	0.4	1	0	7	0	0	0	8.5	0	0	0	0	0	0	0	0	0	0	0	0	0	0	0	0	0
2003-05-10	0	0	0	0	0	0	0	0	0	0	0	0	0	0	0	0	0	0	0	0	0	0	0	0	0	0	1.3	0	0	0	0	3.6	14.1	0	0	0	0	0	0	0	0	0	0	0	0	0	0	0	0
2003-05-11	0	0	0	0	0	0	0	0	0	0	0	0	0	0	0	0	0	0	0	0	0	0	0.6	0.6	0	0	3.8	0	0	0	0	0	0	0	0	0	0	0	0	0	0	0	0	0	0	0	0	0	0
2003-05-12	0	0	0	0	0	0	0	0	0	0	0	0	0	0	0	0	0	0	0	0	0	0	0	0	0	0	0	0	0	0	0	0	0	0	0	0	0	0	0	0	0	0	0	0	0	0	0	0	0
2003-05-13	0	0	0	0	0	2	0	0	0	0	0	0	0	0	0	0	0	0	0	0	0	0	0	0	0	0	0	0.9	0	0	0	2.9	0	0	0	0	0	0	0	0	0	0	0	0	0	0	0	0	0
2003-05-14	0	0	0	0	0.1	2	0	0	0	0	0.1	0	0	0	0	0	0	0	0	0	0	0	0	0	0	0	0	0	0	0	0	3.3	0	0	0	0	0	0	0	0	0	0	0	0	0	0	0	0	0
2003-05-15	0	0	0	0	0.2	0.8	0	0	0.3	0	0	0	0	0	0.7	0	0	0	0.4	0.1	0	0	0	0	0	0	0	0	0	0	0	0	0	0	0	0	0	0	0.9	0	0	0	0	0	0	0	0.7	0.1	0
2003-05-16	0	0	0	0	0	2.6	0	0	0	0	0	0	0	0	0	0	0	0	0	0	0	0	0	0	0	0	0	0	0	0	0	6	0	0	0	0	0.2	0	0	0	0	0	0	0	0	0	0	0	0
2003-05-17	0	0	0	0	0	0	0	0	0	0	0	0	0	0	0	0	0	0	0	0	0	0	0	0	0	0	2	3.1	0	0	0	2.7	0	0	0	0	0	0	0	0	0	0	0	0	0	0	0	0	0
2003-05-18	0	0	0	0	0	0.5	0	0	0	0	0	0	0	0	0	0	0	0	0	0	0	0	0	0	0	0	0	0	0	0	0	1.4	0	0	0	0	0	0	0	0	0	0	0	0	0	0	0	0	0
2003-05-19	0	0	0	0	0	1.8	0	0	0	0	0	0	0	0	0	0	0	0	0	0	0	0	0	0	0	0	0	0	0	0	0	0	0	0	0	0	0	0	0	0	0	0	0	0	0	0	0	0	0
2003-05-20	0	0	0	0	0	0	0	0	0	0	0	0	0	0	0	0	0	0	0	0	0	0	0	0	0	0	0.9	0	0	0	0	1.3	0	0	0	0	0	0	0	0	0	0	0	0	0	0	0	0	0
2003-05-21	0	0	0	0	0	0	0	0	0	0	0	0	0	0	0	0	0	0	0	0	0	0	0	0	0	0	0	3	0	0	0	0.7	0	0	0	0	0	0	0	0	0	0	0	0	0	0	0	0	0
2003-05-22	0	0	0	0	0	0	0	0	0	0	0	0	0	0	0	0	0	0	0	0	0	0	0	0	0	0	0	0	0	0	0	0	0	0	0	0	0	0	0	0	0	0	0	0	0	0	0	0	0
2003-05-23	0	0	0	0	0	0	0	0	0	0	0	0	0	0	0	0	0	0	0	0	0	0	0	0	0	0	0	0	0	0	0	0	0	0	0	0	0	0	0	0.4	0	0	0	0	0	0	0	0	0
2003-05-24	0	0	0	0	0	0	0	0	0	0	0	0	0	0	0	0	0	0	0	0	0	0	0	0	0	0	0	0	0	0	0	0	0	0	0	0	0	0	0	0	0	0	0	0	0	0	0	0	0
2003-05-25	0	0	0	0	0	0	0	0	0	0	0	0	0	0	0	0	0	0	0	0	0	0	0	0	0	0	0	0	0	0	0	0	0	0	0	0	0	0	0	0	0	0	0	0	0	0	0	0	0
2003-05-26	0	0	0	0	0	0	0	0	0	0	0	0	0	0	0	0	0	0	0	0	0	0	0	0	0	0	0	0	0	0	0	0	0	0	0	0	0	0	0	0	0	0	0	0	0	0	0	0	0
2003-05-27	0	0	0	0	0	11.9	0	0	0	0	0	0.2	0	3.7	0	0	0.2	0.8	0	0	0	0.2	0	0	0	0	0	0	0.2	0.5	0.2	0.6	0	0	0	0	0	0	0	0	0.2	0	0	0	0	0	0	0	0.2
2003-05-28	0	0	0	0	0	0	0	0	0	0	0	0	8.7	0	0	6.5	0	0	0	0	0	0	7.3	7.3	8.7	9.8	0	0.1	0.5	0	0	0.5	0	0	0	0	0	0	0	0	2.2	0	0	0	0	0	0	0	0
2003-05-29	0	0	0	0.1	0	1.2	0	0	0	0	0	0	0	0.3	0	0	0	0	0	0	0	0	0	0	0	0	0.4	0	0	0	0	0	0.2	0	0	0	0	0	0	0	0	0	0	0	0	0	0	0	0
2003-05-30	0	0	0	0.1	0	1.9	0	0	0	0	0	0	0	0	0	0	0	0	0	0	0	0	0	0	0	0	0	0	0	0	0	0	0	0	0	0	0	0	0	0	0	0	0	0	0	0	0	0	0
2003-05-31	0	0	0	0	0	0	0	0	0	0	0	0	0	0	0	0	0	0	0	0	0	0	0	0	0	0	0	0	0	0	0	0	0	0	0	0	0	0	0	0	0	0	0.7	0	0	0	0	0	0
2003-06-01	0	0	0	0	0	0	0	0	0	0	0	0	0	0	0	0	0	0	0	0	0	0	0	0	0	0	0	1.4	0	0	0	0.7	0	0	0	5.5	0	0	0	0	0	0	0.4	0	0	0.4	0	0	0
2003-06-02	0	0	0	0	0	0.2	0	0	0	0	0	0	0	0	0	0	0	0	0	0	0	0	0	0	0	0	0	0	0	0	0	0	0	0	0	0	0	0	0	0	0	0	0	0	0	0	0	0	0
2003-06-03	0	0	0	0	0	5.1	0	0	0	0	0	0	0	3.6	0	0	0	0	0	0	0	0	0	0	0	0	0.4	4.8	0	0	0	2.3	0	0	0	0	0	0	0	0	0	0	0	0	0	0	0	0	0
2003-06-04	0	0	0	0	0	3.1	0	0	0	0	0	0	0	4.3	0	0	0	0	0	0	0	0	0	0	0	0	0	0	0	0	0	3.6	0	0	0	0	0	0	0	0	0	0.1	0	0	0	0	0	0	0
2003-06-05	0	0	0	0	0	0	0	0	0	0	0	0	0	0	0	0	0	0	0	0	0	0	0	0	0	0	4.7	0	0	0	0	1	0	0	0	0	0	0	0	0	0	0	0	0	0	0	0	0	0
2003-06-06	0	0	0	0	0	2.2	0	0	0	0	0	0	0	0	0	0	0	0	0	0	0	0	0	0	0	0	1.7	0	0	0	0	0	0	0	0	0	0	0	0	0	0	0	0	0	0	0	0	0	0
2003-06-07	0	0	0	0	0	0	0	0	0	0	0	0	0	0	0	0	0	0	0	0	0	0	0	0	0	0	2.8	0	0	0	0	0	0	0	1.1	0	0	0	0	0	0	0.2	0	0	0	0	0	0	0
2003-06-08	0	0	0	0	0	0	0	0	0	0	0	0	0	0	0	0	0	0	0	0	0	0	0	0	0	0	11.9	0	0	0	0	0	0	0	0	0	0	0	0	0	0	0.1	0	0	0.2	0	0	0	0
2003-06-09	0	0	0	0	0	0	0	0	0	0	0	0	0	0	0	0	0	0	0	0	0	0	0	0	0	0	8.1	2.7	0	0	0	3.1	0	0	0	0	0	0	0	0	0	0	0	0	0	0	0	0	0
2003-06-10	0	0	0	0	11.2	0.3	0	0	1.1	0	0	0	0	0	0	0	0	0	0	0	0	0	0	0	0	0	0	1.5	0	0	0	2.7	0	0	0	0	0	0	2.9	0	0	0	0	0	0	0	0	0	0
2003-06-11	0	0	0	0	0	0.5	0	0	0	0	0	0	0	0	0	0	0	0	0	0	0	0	0	0	0	0	0	9.3	0	0	0	12	0	0	0	0	0	0	0	0	0	0	0	0	0	0	0	0	0
2003-06-12	0	0	0	0	0	2	0	0	0	0	0.2	0	0	0	0	0	0	0	0	0	0	0	0	0	0	0	9.8	0	0	0	0	8.5	0	0	0	0	0	0	0	0	0	0	0	0	0	0	0	0	0
2003-06-13	0	0	0	0	0	0	0	0	0	0	0	0	0	4.4	0	0	0	0	0	0	0	0	0	0	0	0	0.7	0	0	0	0	0	0	0	0	0	0	0	0	0	0	0	0	0	0	0	0	0	0
2003-06-14	0	0	0	0	0	0	0	0	0	0	4.7	0	0	0	0	0	0	0	0	0	0	0	0	0	0	0	2	1.9	0.5	0	0	3.1	0	0	0	0	0	0	0	0	0	0.1	0	0	0	0	0	0	0
2003-06-15	0	0	0	0	0	0.4	0	0	0	0	0	0	0	0	0	0	0	0	0	0	0	0	0	0	0	0	0	0	0	0	0	0	0	0	0	0	0	0	2.4	0	0	0	0	0	0	0	0	0	0
2003-06-16	0	0	0	0	0.6	4.7	0	0	0	0	0	0	0	0	0	0	0	0	0	0	0	0	0	0	0	0	0	0	0	0	0	3.1	0	0	0	0	0	0	0	0	0	0	0	0	0	0	0	0	0
2003-06-17	0.1	0	0	0	3.2	1.2	0	0	0	0	0	0	0	0	0	0	0	0	0	0	0	0	0	0	0	0	2.2	0	0	0	0	0.9	0	0	0	0	0	0	0	0	0	0	0	0	0	0	0	0	0
2003-06-18	0	0	0	0	0.5	6	0	0	0	0.3	0	0	0	0	0	0	0	0	0	0	3.7	0	0	0	0	0	4.1	0	0	0	0	0	0	0	0	0	0	0	5.3	0	0	0	0	0	0	0	0	0	0
2003-06-19	0	0	0	0	0.2	3.1	0	0	0.1	0	0.4	0	0	0.9	0	0.1	0	0	0	0	0	0	0	0	0	0	1.1	0	0.1	0	0	0	0	0	0	0	0	0	0	0	0	0	0	0	0	0	0	0	0
2003-06-20	0	0	0	0	0.4	0	0	0.1	0.2	0	0	0	0	1.2	0	0	0	0	0	0	0	0	0	0	0	0	0	0	0	0	0	2.4	0	0	0	0	0	0	0	0	0	0	0	0	0	0	0	0	0
[truncated: 3,847 more rows]
[truncated: 82 more columns]
