# Supplementary material for: Performance of bias-correction schemes for CMORPH rainfall estimates in the Zambezi River basin
Source: Copernicus journal article supplement (doi:10.5194/hess-23-2915-2019), 2019-07-12
Supplement: Supplementary file 2 [file hess-23-2915-2019-supplement.zip › Data/Mean Annual Rainfall_Gauge_1998-2013.tif.aux.xml]

<PAMDataset>
  <PAMRasterBand band="1">
    <Metadata>
      <MDI key="STATISTICS_MAXIMUM">1203</MDI>
      <MDI key="STATISTICS_MEAN">883.33769776323</MDI>
      <MDI key="STATISTICS_MINIMUM">612</MDI>
      <MDI key="STATISTICS_STDDEV">101.82554630091</MDI>
    </Metadata>
  </PAMRasterBand>
</PAMDataset>
